# Supplementary material for: Evolution of transcription factor binding through sequence variations and turnover of binding sites
Source: HighWire-hosted journal article supplement (doi:10.1101/gr.276715.122), 2022-05-26
Supplement: Supplemental_Code.zip [file bioSample.xlsx]

## Sheet: Sheet1
sample_name	sample_title	bioproject_accession	organism	strain	isolate	host	isolation_source	collection_date	geo_loc_name	sample_type	collected_by	transcription_factor	tagged_allele	replicate	binding_site_swap
ABF1_rep1			Saccharomyces cerevisiae x Saccharomyces paradoxus	not applicable	S288c x OS142	not applicable	not applicable	16-Feb-2020	not applicable	cell culture	Gat Krieger and Offir Lupo	ABF1	cerevisiae	rep1
ABF1_rep2			Saccharomyces cerevisiae x Saccharomyces paradoxus	not applicable	S288c x OS142	not applicable	not applicable	16-Feb-2020	not applicable	cell culture	Gat Krieger and Offir Lupo	ABF1	cerevisiae	rep2
REB1_rep1			Saccharomyces cerevisiae x Saccharomyces paradoxus	not applicable	S288c x OS142	not applicable	not applicable	16-Feb-2020	not applicable	cell culture	Gat Krieger and Offir Lupo	REB1	cerevisiae	rep1
REB1_rep2			Saccharomyces cerevisiae x Saccharomyces paradoxus	not applicable	S288c x OS142	not applicable	not applicable	16-Feb-2020	not applicable	cell culture	Gat Krieger and Offir Lupo	REB1	cerevisiae	rep2
REB1_rep4			Saccharomyces cerevisiae x Saccharomyces paradoxus	not applicable	S288c x OS142	not applicable	not applicable	16-Aug-2020	not applicable	cell culture	Gat Krieger and Offir Lupo	REB1	cerevisiae	rep4
RAP1_rep1			Saccharomyces cerevisiae x Saccharomyces paradoxus	not applicable	S288c x OS142	not applicable	not applicable	16-Feb-2020	not applicable	cell culture	Gat Krieger and Offir Lupo	RAP1	cerevisiae	rep1
RAP1_rep2			Saccharomyces cerevisiae x Saccharomyces paradoxus	not applicable	S288c x OS142	not applicable	not applicable	16-Feb-2020	not applicable	cell culture	Gat Krieger and Offir Lupo	RAP1	cerevisiae	rep2
DOT6_rep1			Saccharomyces cerevisiae x Saccharomyces paradoxus	not applicable	S288c x OS142	not applicable	not applicable	06-Feb-2020	not applicable	cell culture	Gat Krieger and Offir Lupo	DOT6	cerevisiae	rep1
DOT6_rep2			Saccharomyces cerevisiae x Saccharomyces paradoxus	not applicable	S288c x OS142	not applicable	not applicable	06-Feb-2020	not applicable	cell culture	Gat Krieger and Offir Lupo	DOT6	cerevisiae	rep2
TOD6_rep1			Saccharomyces cerevisiae x Saccharomyces paradoxus	not applicable	S288c x OS142	not applicable	not applicable	20-Mar-2020	not applicable	cell culture	Gat Krieger and Offir Lupo	TOD6	cerevisiae	rep1
TOD6_rep2			Saccharomyces cerevisiae x Saccharomyces paradoxus	not applicable	S288c x OS142	not applicable	not applicable	20-Mar-2020	not applicable	cell culture	Gat Krieger and Offir Lupo	TOD6	cerevisiae	rep2
FHL1_rep1			Saccharomyces cerevisiae x Saccharomyces paradoxus	not applicable	S288c x OS142	not applicable	not applicable	20-Mar-2020	not applicable	cell culture	Gat Krieger and Offir Lupo	FHL1	cerevisiae	rep1
FHL1_rep2			Saccharomyces cerevisiae x Saccharomyces paradoxus	not applicable	S288c x OS142	not applicable	not applicable	20-Mar-2020	not applicable	cell culture	Gat Krieger and Offir Lupo	FHL1	cerevisiae	rep2
TBF1_rep1			Saccharomyces cerevisiae x Saccharomyces paradoxus	not applicable	S288c x OS142	not applicable	not applicable	20-Mar-2020	not applicable	cell culture	Gat Krieger and Offir Lupo	TBF1	cerevisiae	rep1
TBF1_rep2			Saccharomyces cerevisiae x Saccharomyces paradoxus	not applicable	S288c x OS142	not applicable	not applicable	20-Mar-2020	not applicable	cell culture	Gat Krieger and Offir Lupo	TBF1	cerevisiae	rep2
STB3_rep1			Saccharomyces cerevisiae x Saccharomyces paradoxus	not applicable	S288c x OS142	not applicable	not applicable	20-Mar-2020	not applicable	cell culture	Gat Krieger and Offir Lupo	STB3	cerevisiae	rep1
STB3_rep2			Saccharomyces cerevisiae x Saccharomyces paradoxus	not applicable	S288c x OS142	not applicable	not applicable	20-Mar-2020	not applicable	cell culture	Gat Krieger and Offir Lupo	STB3	cerevisiae	rep2
PHO4_rep1			Saccharomyces cerevisiae x Saccharomyces paradoxus	not applicable	S288c x OS142	not applicable	not applicable	16-Feb-2020	not applicable	cell culture	Gat Krieger and Offir Lupo	PHO4	cerevisiae	rep1
PHO4_rep2			Saccharomyces cerevisiae x Saccharomyces paradoxus	not applicable	S288c x OS142	not applicable	not applicable	16-Feb-2020	not applicable	cell culture	Gat Krieger and Offir Lupo	PHO4	cerevisiae	rep2
PHO2_rep1			Saccharomyces cerevisiae x Saccharomyces paradoxus	not applicable	S288c x OS142	not applicable	not applicable	20-Mar-2020	not applicable	cell culture	Gat Krieger and Offir Lupo	PHO2	cerevisiae	rep1
PHO2_rep2			Saccharomyces cerevisiae x Saccharomyces paradoxus	not applicable	S288c x OS142	not applicable	not applicable	20-Mar-2020	not applicable	cell culture	Gat Krieger and Offir Lupo	PHO2	cerevisiae	rep2
HAP4_rep1			Saccharomyces cerevisiae x Saccharomyces paradoxus	not applicable	S288c x OS142	not applicable	not applicable	06-Feb-2020	not applicable	cell culture	Gat Krieger and Offir Lupo	HAP4	cerevisiae	rep1
HAP4_rep2			Saccharomyces cerevisiae x Saccharomyces paradoxus	not applicable	S288c x OS142	not applicable	not applicable	06-Feb-2020	not applicable	cell culture	Gat Krieger and Offir Lupo	HAP4	cerevisiae	rep2
MBP1_rep1			Saccharomyces cerevisiae x Saccharomyces paradoxus	not applicable	S288c x OS142	not applicable	not applicable	16-Feb-2020	not applicable	cell culture	Gat Krieger and Offir Lupo	MBP1	cerevisiae	rep1
MBP1_rep2			Saccharomyces cerevisiae x Saccharomyces paradoxus	not applicable	S288c x OS142	not applicable	not applicable	16-Feb-2020	not applicable	cell culture	Gat Krieger and Offir Lupo	MBP1	cerevisiae	rep2
SWI4_rep1			Saccharomyces cerevisiae x Saccharomyces paradoxus	not applicable	S288c x OS142	not applicable	not applicable	16-Feb-2020	not applicable	cell culture	Gat Krieger and Offir Lupo	SWI4	cerevisiae	rep1
SWI4_rep2			Saccharomyces cerevisiae x Saccharomyces paradoxus	not applicable	S288c x OS142	not applicable	not applicable	16-Feb-2020	not applicable	cell culture	Gat Krieger and Offir Lupo	SWI4	cerevisiae	rep2
SKN7_rep1			Saccharomyces cerevisiae x Saccharomyces paradoxus	not applicable	S288c x OS142	not applicable	not applicable	06-Feb-2020	not applicable	cell culture	Gat Krieger and Offir Lupo	SKN7	cerevisiae	rep1
SKN7_rep2			Saccharomyces cerevisiae x Saccharomyces paradoxus	not applicable	S288c x OS142	not applicable	not applicable	06-Feb-2020	not applicable	cell culture	Gat Krieger and Offir Lupo	SKN7	cerevisiae	rep2
TEC1_rep1			Saccharomyces cerevisiae x Saccharomyces paradoxus	not applicable	S288c x OS142	not applicable	not applicable	20-Mar-2020	not applicable	cell culture	Gat Krieger and Offir Lupo	TEC1	cerevisiae	rep1
TEC1_rep2			Saccharomyces cerevisiae x Saccharomyces paradoxus	not applicable	S288c x OS142	not applicable	not applicable	20-Mar-2020	not applicable	cell culture	Gat Krieger and Offir Lupo	TEC1	cerevisiae	rep2
PHD1_rep1			Saccharomyces cerevisiae x Saccharomyces paradoxus	not applicable	S288c x OS142	not applicable	not applicable	20-Mar-2020	not applicable	cell culture	Gat Krieger and Offir Lupo	PHD1	cerevisiae	rep1
PHD1_rep2			Saccharomyces cerevisiae x Saccharomyces paradoxus	not applicable	S288c x OS142	not applicable	not applicable	20-Mar-2020	not applicable	cell culture	Gat Krieger and Offir Lupo	PHD1	cerevisiae	rep2
SOK2_rep1			Saccharomyces cerevisiae x Saccharomyces paradoxus	not applicable	S288c x OS142	not applicable	not applicable	16-Feb-2020	not applicable	cell culture	Gat Krieger and Offir Lupo	SOK2	cerevisiae	rep1
SOK2_rep2			Saccharomyces cerevisiae x Saccharomyces paradoxus	not applicable	S288c x OS142	not applicable	not applicable	16-Feb-2020	not applicable	cell culture	Gat Krieger and Offir Lupo	SOK2	cerevisiae	rep2
HMS2_rep1			Saccharomyces cerevisiae x Saccharomyces paradoxus	not applicable	S288c x OS142	not applicable	not applicable	16-Feb-2020	not applicable	cell culture	Gat Krieger and Offir Lupo	HMS2	cerevisiae	rep1
HMS2_rep2			Saccharomyces cerevisiae x Saccharomyces paradoxus	not applicable	S288c x OS142	not applicable	not applicable	16-Feb-2020	not applicable	cell culture	Gat Krieger and Offir Lupo	HMS2	cerevisiae	rep2
ASH1_rep1			Saccharomyces cerevisiae x Saccharomyces paradoxus	not applicable	S288c x OS142	not applicable	not applicable	20-Mar-2020	not applicable	cell culture	Gat Krieger and Offir Lupo	ASH1	cerevisiae	rep1
ASH1_rep2			Saccharomyces cerevisiae x Saccharomyces paradoxus	not applicable	S288c x OS142	not applicable	not applicable	20-Mar-2020	not applicable	cell culture	Gat Krieger and Offir Lupo	ASH1	cerevisiae	rep2
MSN2_rep5			Saccharomyces cerevisiae x Saccharomyces paradoxus	not applicable	S288c x OS142	not applicable	not applicable	20-Mar-2020	not applicable	cell culture	Gat Krieger and Offir Lupo	MSN2	cerevisiae	rep5
MSN2_rep6			Saccharomyces cerevisiae x Saccharomyces paradoxus	not applicable	S288c x OS142	not applicable	not applicable	20-Mar-2020	not applicable	cell culture	Gat Krieger and Offir Lupo	MSN2	cerevisiae	rep6
GCR2_rep1			Saccharomyces cerevisiae x Saccharomyces paradoxus	not applicable	S288c x OS142	not applicable	not applicable	16-Feb-2020	not applicable	cell culture	Gat Krieger and Offir Lupo	GCR2	cerevisiae	rep1
GCR2_rep2			Saccharomyces cerevisiae x Saccharomyces paradoxus	not applicable	S288c x OS142	not applicable	not applicable	16-Feb-2020	not applicable	cell culture	Gat Krieger and Offir Lupo	GCR2	cerevisiae	rep2
MIG1_rep1			Saccharomyces cerevisiae x Saccharomyces paradoxus	not applicable	S288c x OS142	not applicable	not applicable	06-Feb-2020	not applicable	cell culture	Gat Krieger and Offir Lupo	MIG1	cerevisiae	rep1
MIG1_rep2			Saccharomyces cerevisiae x Saccharomyces paradoxus	not applicable	S288c x OS142	not applicable	not applicable	06-Feb-2020	not applicable	cell culture	Gat Krieger and Offir Lupo	MIG1	cerevisiae	rep2
MIG2_rep1			Saccharomyces cerevisiae x Saccharomyces paradoxus	not applicable	S288c x OS142	not applicable	not applicable	06-Feb-2020	not applicable	cell culture	Gat Krieger and Offir Lupo	MIG2	cerevisiae	rep1
MIG2_rep2			Saccharomyces cerevisiae x Saccharomyces paradoxus	not applicable	S288c x OS142	not applicable	not applicable	06-Feb-2020	not applicable	cell culture	Gat Krieger and Offir Lupo	MIG2	cerevisiae	rep2
RGT1_rep1			Saccharomyces cerevisiae x Saccharomyces paradoxus	not applicable	S288c x OS142	not applicable	not applicable	06-Feb-2020	not applicable	cell culture	Gat Krieger and Offir Lupo	RGT1	cerevisiae	rep1
RGT1_rep2			Saccharomyces cerevisiae x Saccharomyces paradoxus	not applicable	S288c x OS142	not applicable	not applicable	06-Feb-2020	not applicable	cell culture	Gat Krieger and Offir Lupo	RGT1	cerevisiae	rep2
RPB9_rep1			Saccharomyces cerevisiae x Saccharomyces paradoxus	not applicable	S288c x OS142	not applicable	not applicable	20-Mar-2020	not applicable	cell culture	Gat Krieger and Offir Lupo	RPB9	cerevisiae	rep1
RPB9_rep2			Saccharomyces cerevisiae x Saccharomyces paradoxus	not applicable	S288c x OS142	not applicable	not applicable	20-Mar-2020	not applicable	cell culture	Gat Krieger and Offir Lupo	RPB9	cerevisiae	rep2
SUT1_rep1			Saccharomyces cerevisiae x Saccharomyces paradoxus	not applicable	S288c x OS142	not applicable	not applicable	20-Mar-2020	not applicable	cell culture	Gat Krieger and Offir Lupo	SUT1	cerevisiae	rep1
SUT1_rep2			Saccharomyces cerevisiae x Saccharomyces paradoxus	not applicable	S288c x OS142	not applicable	not applicable	20-Mar-2020	not applicable	cell culture	Gat Krieger and Offir Lupo	SUT1	cerevisiae	rep2
CFKH1_rep2			Saccharomyces cerevisiae x Saccharomyces paradoxus	not applicable	S288c x OS142	not applicable	not applicable	06-Feb-2020	not applicable	cell culture	Gat Krieger and Offir Lupo	FKH1	cerevisiae	rep2
PFKH1_rep2			Saccharomyces cerevisiae x Saccharomyces paradoxus	not applicable	S288c x OS142	not applicable	not applicable	06-Feb-2020	not applicable	cell culture	Gat Krieger and Offir Lupo	FKH1	paradoxus	rep2
CFKH2_rep1			Saccharomyces cerevisiae x Saccharomyces paradoxus	not applicable	S288c x OS142	not applicable	not applicable	06-Feb-2020	not applicable	cell culture	Gat Krieger and Offir Lupo	FKH2	cerevisiae	rep1
CFKH2_rep2			Saccharomyces cerevisiae x Saccharomyces paradoxus	not applicable	S288c x OS142	not applicable	not applicable	06-Feb-2020	not applicable	cell culture	Gat Krieger and Offir Lupo	FKH2	cerevisiae	rep2
PFKH2_rep1			Saccharomyces cerevisiae x Saccharomyces paradoxus	not applicable	S288c x OS142	not applicable	not applicable	06-Feb-2020	not applicable	cell culture	Gat Krieger and Offir Lupo	FKH2	paradoxus	rep1
PFKH2_rep2			Saccharomyces cerevisiae x Saccharomyces paradoxus	not applicable	S288c x OS142	not applicable	not applicable	06-Feb-2020	not applicable	cell culture	Gat Krieger and Offir Lupo	FKH2	paradoxus	rep2
hyb_cace2_rep1			Saccharomyces cerevisiae x Saccharomyces paradoxus	not applicable	S288c x OS142	not applicable	not applicable	27-Feb-2019	not applicable	cell culture	Offir Lupo	ACE2	cerevisiae	rep1
hyb_cace2_rep2			Saccharomyces cerevisiae x Saccharomyces paradoxus	not applicable	S288c x OS142	not applicable	not applicable	27-Feb-2019	not applicable	cell culture	Offir Lupo	ACE2	cerevisiae	rep2
hyb_pace2_rep1			Saccharomyces cerevisiae x Saccharomyces paradoxus	not applicable	S288c x OS142	not applicable	not applicable	27-Feb-2019	not applicable	cell culture	Offir Lupo	ACE2	paradoxus	rep1
hyb_pace2_rep2			Saccharomyces cerevisiae x Saccharomyces paradoxus	not applicable	S288c x OS142	not applicable	not applicable	27-Feb-2019	not applicable	cell culture	Offir Lupo	ACE2	paradoxus	rep2
hyb_cswi5_rep1			Saccharomyces cerevisiae x Saccharomyces paradoxus	not applicable	S288c x OS142	not applicable	not applicable	27-Feb-2019	not applicable	cell culture	Offir Lupo	SWI5	cerevisiae	rep1
hyb_cswi5_rep2			Saccharomyces cerevisiae x Saccharomyces paradoxus	not applicable	S288c x OS142	not applicable	not applicable	27-Feb-2019	not applicable	cell culture	Offir Lupo	SWI5	cerevisiae	rep2
hyb_cswi5_rep3			Saccharomyces cerevisiae x Saccharomyces paradoxus	not applicable	S288c x OS142	not applicable	not applicable	27-Feb-2019	not applicable	cell culture	Offir Lupo	SWI5	cerevisiae	rep3
hyb_cswi5_rep4			Saccharomyces cerevisiae x Saccharomyces paradoxus	not applicable	S288c x OS142	not applicable	not applicable	27-Feb-2019	not applicable	cell culture	Offir Lupo	SWI5	cerevisiae	rep4
hyb_pswi5_rep1			Saccharomyces cerevisiae x Saccharomyces paradoxus	not applicable	S288c x OS142	not applicable	not applicable	27-Feb-2019	not applicable	cell culture	Offir Lupo	SWI5	paradoxus	rep1
hyb1_rep1			Saccharomyces cerevisiae x Saccharomyces paradoxus	not applicable	S288c x OS142	not applicable	not applicable	11-Jan-2021	not applicable	cell culture	Gat Krieger and Offir Lupo	REB1	cerevisiae	rep1	hyb1: D1: TDH3 + GSP2 cer x D4: THO1 + VRG4 par
hyb2_rep1			Saccharomyces cerevisiae x Saccharomyces paradoxus	not applicable	S288c x OS142	not applicable	not applicable	11-Jan-2021	not applicable	cell culture	Gat Krieger and Offir Lupo	REB1	cerevisiae	rep1	hyb2: THO1 cer x D2: TDH3 + GSP2 par
hyb3_rep1			Saccharomyces cerevisiae x Saccharomyces paradoxus	not applicable	S288c x OS142	not applicable	not applicable	11-Jan-2021	not applicable	cell culture	Gat Krieger and Offir Lupo	REB1	cerevisiae	rep1	hyb3: VRG4 cer x CRP1 par
hyb4_rep1			Saccharomyces cerevisiae x Saccharomyces paradoxus	not applicable	S288c x OS142	not applicable	not applicable	11-Jan-2021	not applicable	cell culture	Gat Krieger and Offir Lupo	ACE2	cerevisiae	rep1	hyb4: D5: USV1 + HSP150 cer x ATG41 par
hyb5_rep1			Saccharomyces cerevisiae x Saccharomyces paradoxus	not applicable	S288c x OS142	not applicable	not applicable	11-Jan-2021	not applicable	cell culture	Gat Krieger and Offir Lupo	ACE2	cerevisiae	rep1	hyb5: ATG41 cer x D6: USV1 + HSP150 par
hyb6_rep1			Saccharomyces cerevisiae x Saccharomyces paradoxus	not applicable	S288c x OS142	not applicable	not applicable	11-Jan-2021	not applicable	cell culture	Gat Krieger and Offir Lupo	MSN2	cerevisiae	rep1	hyb6: HSP26 cer x GIS1 par
hyb7_rep1			Saccharomyces cerevisiae x Saccharomyces paradoxus	not applicable	S288c x OS142	not applicable	not applicable	11-Jan-2021	not applicable	cell culture	Gat Krieger and Offir Lupo	MSN2	cerevisiae	rep1	hyb7: GIS1 cer x HSP26 par
hyb1_rep2			Saccharomyces cerevisiae x Saccharomyces paradoxus	not applicable	S288c x OS142	not applicable	not applicable	11-Jan-2021	not applicable	cell culture	Gat Krieger and Offir Lupo	REB1	cerevisiae	rep2	hyb1: D1: TDH3 + GSP2 cer x D4: THO1 + VRG4 par
hyb2_rep2			Saccharomyces cerevisiae x Saccharomyces paradoxus	not applicable	S288c x OS142	not applicable	not applicable	11-Jan-2021	not applicable	cell culture	Gat Krieger and Offir Lupo	REB1	cerevisiae	rep2	hyb2: THO1 cer x D2: TDH3 + GSP2 par
hyb3_rep2			Saccharomyces cerevisiae x Saccharomyces paradoxus	not applicable	S288c x OS142	not applicable	not applicable	11-Jan-2021	not applicable	cell culture	Gat Krieger and Offir Lupo	REB1	cerevisiae	rep2	hyb3: VRG4 cer x CRP1 par
hyb4_rep2			Saccharomyces cerevisiae x Saccharomyces paradoxus	not applicable	S288c x OS142	not applicable	not applicable	11-Jan-2021	not applicable	cell culture	Gat Krieger and Offir Lupo	ACE2	cerevisiae	rep2	hyb4: D5: USV1 + HSP150 cer x ATG41 par
hyb5_rep2			Saccharomyces cerevisiae x Saccharomyces paradoxus	not applicable	S288c x OS142	not applicable	not applicable	11-Jan-2021	not applicable	cell culture	Gat Krieger and Offir Lupo	ACE2	cerevisiae	rep2	hyb5: ATG41 cer x D6: USV1 + HSP150 par
hyb6_rep2			Saccharomyces cerevisiae x Saccharomyces paradoxus	not applicable	S288c x OS142	not applicable	not applicable	11-Jan-2021	not applicable	cell culture	Gat Krieger and Offir Lupo	MSN2	cerevisiae	rep2	hyb6: HSP26 cer x GIS1 par
hyb7_rep2			Saccharomyces cerevisiae x Saccharomyces paradoxus	not applicable	S288c x OS142	not applicable	not applicable	11-Jan-2021	not applicable	cell culture	Gat Krieger and Offir Lupo	MSN2	cerevisiae	rep2	hyb7: GIS1 cer x HSP26 par
