# Supplementary material for: Evolution of transcription factor binding through sequence variations and turnover of binding sites
Source: HighWire-hosted journal article supplement (doi:10.1101/gr.276715.122), 2022-05-26
Supplement: Supplemental_Table_S6.xlsx [file Supplemental_Table_S6.xlsx]

## Sheet: Description
Column header	description
locs	location on the aligned promoter sequence coordinates, that ranges 2.4 M bases
chr_cer	location on the regular genome coordinates, chromosome number in S. cerevisiae (SacCer3)
pos_cer	position on the chromosome
chr_par	location on the regular genome coordinates, chromosome number in S. paradoxus (CBS432)
pos_par	position on the chromosome
peak_cer	1 if peak exceeds threshold, 0 if doesn't
peak_par
height_cer	peak height. 5' ends of reads were of normalized by the sum, multiplied by 1E7 and smoothed (20 bp sliding window) for peak calling
height_par
sum_cer	Sum of signal at the peak region (60 bp centered at the peak)
sum_par
max_score_cer	Maximal 7-mer motif score at the peak region
max_score_par
max_PWMscore_cer	Maximal PWM score at the peak region
max_PWMscore_par
seq_cer	Sequence of the best matching motif, with 5 flanking bases. (For Abf1 we did not include flanking bases) To find the sequence that best matches the motif we start from the site of maximal PWM score (60 bp centered at the peak), then search for a better PWM score at a region of +- 15 bases from that region
seq_par
motif_cer	1 if PWM motif exceeds threshold, 0 if doesn't
motif_par
seqDistMotif	Number of mismatches/ INDELS between orthologous sequences at the core motif
seqDistFlank	Number of mismatches/ INDELS between orthologous sequences at the five flanking bases
motif_com_alt	1 if the motif has a common mutation (common alternative), meaning an alternative base that is common to both orthologues
motif_uni_alt	1 if the motif has a unique mutation (unique alternative), meaning an alternative base in one orthologue and a consensus base in the other orthologue
motif_com_cons	1 if consensus motif appears in both orthologues

## Sheet: ABF1
locs	chr_cer	pos_cer	chr_par	pos_par	peak_cer	peak_par	gene	height_cer	height_par	sum_cer	sum_par	max_score_cer	max_score_par	max_PWMscore_cer	max_PWMscore_par	seq_cer	seq_par	motif_cer	motif_par	seqDistMotif	seqDistFlank	motif_com_alt	motif_uni_alt	motif_com_cons
4598	1	132067	1	122017	1	1	SWC3	1295.75	2130.62	24814.1	35635.2	7.91446	8.09647	0.838181	0.882169	ATCATCTAACACG	ATCATCCGACACG	1	1	2	3	0	0	1
4652	1	132121	1	122063	1	1	SWC3	1709.36	1946.52	33168	35834.8	7.91446	8.09647	0.838181	0.882169	ATCATCTAACACG	ATCATCCGACACG	1	1	2	3	0	0	1
5864	1	124663	1	114668	1	1	TPD3	751.426	1787.14	12079	30357.8	10.3477	9.06283	0	0	CTACTGCTATTCT	ATGCTACTATT-T	0	0	4	1	0	0	0
5906	1	124705	1	114710	0	1	TPD3	286.294	954.366	5267.79	14864.4	10.3477	9.06283	0.899452	0.899452	ATCACTACAGACG	ATCACTCTAGACG	1	1	2	4	0	0	1
8873	1	108816	1	98885	1	0	PMT2	2167.41	440.877	36633.6	7835.62	10.7219	9.70093	0	0	GCCATCATTTACA	ACCATCATTTACA	0	0	1	0	0	0	0
8915	1	108778	1	98851	1	1	PMT2	1982.37	1094.09	33340.6	18866	11.6091	11.6091	0.912016	0.890021	GTCGCTATGTACG	GTCGCTATTTACG	1	1	1	6	0	0	1
11728	1	84610	1	74679	1	1	PRP45	1002.71	2107.5	17422	38194.2	7.84015	7.75551	0	0	ATTCAAAAGTACT	ATTCAAAAGTACT	0	0	0	2	0	0	0
11768	1	84571	1	74639	0	1	PRP45	386.577	1155.42	6126.08	19998.3	7.84015	8.11348	0.60487	0.582875	GTAATTCTTCACG	GTAATTCTTTACG	1	1	1	1	1	0	0
12246	1	76330	1	66440	1	1	RBG1	1154.55	2277.21	20552.5	36964	7.27776	7.27776	0.921446	0.899452	ATCACAAGCGACG	ATCACAAACGACG	1	1	1	0	0	0	1
12302	1	76274	1	66386	1	1	RBG1	1408.17	2474.75	19323.1	34084.9	6.83951	10.0525	0.921446	0.899452	ATCACAAGCGACG	ATCACAAACGACG	1	1	1	0	0	0	1
14574	1	68609	1	58791	1	1	CLN3	1500.52	935.067	25801.7	16189	7.91446	7.91446	0	0	GCCACAATCAATT	GCCACAATCAATT	0	0	0	4	0	0	0
14622	1	68562	1	58743	1	1	CLN3	1175.43	774.083	17442.4	10981.9	7.91446	7.91446	0.904163	0.904163	ATCGTGTGCCACG	ATCGTGTGCCACG	1	1	0	0	0	0	1
15528	1	62648	1	52837	1	1	CDC24	2213.37	4293.37	37850.7	68286	10.8755	10.8755	0.816179	0.816179	ATCATATTGTACG	ATCATATTGTACG	1	1	0	4	0	0	1
15582	1	62701	1	52891	1	1	CDC24	1469.24	3342.44	24486.7	54058.4	8.01976	8.92661	0.921446	0.94344	ATCGCGAAGAACG	ATCGCGAAGGACG	1	1	1	1	0	0	1
15905	1	61149	1	51350	1	0	PTA1	992.013	427.357	12829.8	11061.8	9.89418	11.3052	0.868027	0.890021	GTCACTATATACG	GTCACCTTATACG	1	1	2	1	0	0	1
18080	1	45494	1	35733	1	1	ACS1	1084.06	702.278	19682.8	14681.7	8.16642	10.3477	0.860175	0.899452	ATCATTCTGGACG	ATCACTGTTGACG	1	1	3	3	0	0	1
18106	1	45468	1	35707	1	1	ACS1	2161.85	2062.4	29494.7	30284.7	9.96482	10.3477	0	0	ATCAAGATAAATG	ATCACTATTCATG	0	0	4	2	0	0	0
18149	1	45425	1	35664	1	1	ACS1	1099.85	848.995	14765.8	12710.4	9.96482	9.39808	0.882169	0.904163	ATCATCTCGGACG	ATCGTTCCGGACG	1	1	3	0	0	0	1
18277	1	45299	1	35541	1	1	ACS1	1587.82	1442.8	24533.6	24805.4	6.77294	5.80419	0.860175	0.894733	-TCATTTGCCACG	GTCGTTTGCCACG	1	1	2	3	0	0	1
20711	1	33034	1	23256	0	1	BDH2	288.586	761.309	6196.23	13706	6.27942	7.0594	0	0	CTTTTAATTTACT	C-TTTGATTTCGT	0	0	4	0	0	0	0
20746	1	33066	1	23291	1	0	BDH2	1446.96	272.237	23284.9	3865.48	8.16327	8.1643	0	0	AGCATTACGGAAG	AGCATTACGGAAG	0	0	0	2	0	0	0
20783	1	33103	1	23328	1	1	BDH2	999.1	1614.34	16085.6	24736.9	9.76467	8.16327	0.856241	0.856241	CTCACCCCGCACG	CTCACCCCGCACG	1	1	0	1	1	0	0
32504	1	189555	1	180000	1	0	YAT1	965.361	0	15728.8	9.04185	6.7025	5.56499	0.838181	0	ATCGTTTTCAACG	-----TTTCCAAG	1	0	7	3	0	1	0
38441	2	216572	2	237232	1	1	SLA1	916.429	1424.69	15937.6	21820.5	8.1643	7.12767	0	0	AACTTAGAGAACA	AACTGAGAGAACA	0	0	1	1	0	0	0
38496	2	216525	2	237184	1	1	SLA1	1155.87	1089.91	19558.3	18940	9.44754	8.36088	0.890021	0.890021	GTCACTTTCTACG	GTCACTTTCTACG	1	1	0	5	0	0	1
41011	2	193444	2	213469	1	0	ACH1	1893.21	290.194	25563.4	4192.03	11.2505	11.2505	0.636292	0.597015	GGCACTAACGACG	GGCGTTAACGACG	1	1	2	1	0	1	0
41172	2	193594	2	213628	1	1	ACH1	894.87	2521.13	14569.8	40780.8	8.28099	6.37186	0	0	ATATACATATACG	ATATACATATACT	0	0	1	1	0	0	0
41222	2	193644	2	213678	1	1	ACH1	5916.13	4982.6	96770.7	90093.3	11.3052	11.3052	0.82875	0.82875	GTCCTTTTATACG	GTCCTTTTATACG	1	1	0	0	0	0	1
41323	2	193743	2	213777	1	1	ACH1	1539.18	1424.88	21995.1	20314	8.10111	6.83286	0.965434	0.965434	ATCCCCTGCGACG	ATCCCCTGCCACG	1	1	1	0	0	0	1
43526	2	186661	2	206686	1	1	POP8	2432.9	838.911	38126.3	13064.3	10.8755	5.80753	0	0	ATC-TCCATCTTC	TTCTTGCACTTTC	0	0	5	3	0	0	0
43576	2	186611	2	206636	1	0	POP8	1729.94	527.756	31291.8	8870.92	8.11754	9.06161	0.816179	0.838181	ATCATATGTTACG	ATCATGTGTTACG	1	1	1	3	0	0	1
43612	2	186578	2	206601	1	0	POP8	1720.14	253.087	28381	4657.4	7.24026	7.21778	0.860175	0	ATCATCGAGAACG	ATCACCTGGAGCG	1	0	4	4	0	1	0
45560	2	172338	2	192385	1	1	NCL1	1467.84	2270.85	25633.1	37026.4	9.06161	6.83074	0.688138	0	GTACCCA-CTTAC	GTATTCATTTTAC	1	0	4	1	0	0	0
45605	2	172382	2	192427	1	1	NCL1	1064.71	1671.62	16863.1	25296.9	6.83074	6.83074	0.688138	0.806756	GTCATTTAATACG	GTCATTTAATACG	1	1	0	3	1	1	0
48480	2	164405	2	184419	1	1	PET9	2375.95	1914.45	38873.2	33310.2	8.04121	6.2128	0	0	GTTATAGTGAACA	GTTATGGTGCATA	0	0	3	1	0	0	0
48503	2	164382	2	184397	1	1	PET9	1488.17	3976.29	28961.8	72124.3	10.9008	10.7219	0	0	ATACTTCTGTATA	ATATATCTGTACA	0	0	3	2	0	0	0
48542	2	164343	2	184360	1	1	PET9	2771.27	6604.21	48484.7	118651	10.9008	10.7219	0.921446	0.899452	ATCACGATGCACG	ATCACGATGTACG	1	1	1	2	0	0	1
50117	2	153883	2	173860	1	0	POL12	820.305	425.075	13735.9	10912.7	7.46334	6.77294	0	0	CTCTCCAAAAACC	CTCTCCAAAAACC	0	0	0	2	0	0	0
50158	2	153842	2	173819	1	1	POL12	1161.22	993.797	19908	17438.8	7.42644	8.04121	0.921446	0.921446	ATCGCCTCAAACG	ATCGCCTCAAACG	1	1	0	0	0	0	1
51232	2	146046	2	166006	1	1	URA7	666.293	1261.9	11310	22786.8	8.11754	5.88535	0	0	CTTCCAAAGAAGT	CTTACAAAGAA-T	0	0	2	1	0	0	0
51277	2	146001	2	165961	0	1	URA7	585.914	2293.7	10139.2	36725.5	10.3477	10.3477	0.855456	0.855456	ATCACTAATTACG	ATCACTAATTACG	1	1	0	5	0	0	1
52000	2	141131	2	161109	1	1	FUI1	794.714	1749.24	14061.2	25520.1	10.3478	10.7219	0.94344	0.921446	ATCGCTCCGTACG	ATCGCTCTGTACG	1	1	1	1	0	0	1
52053	2	141080	2	161058	0	1	FUI1	393.453	1249.68	8869.81	20836.8	9.07399	10.7219	0.94344	0.921446	ATCGCTCCGTACG	ATCGCTCTGTACG	1	1	1	1	0	0	1
53510	2	136191	2	155984	1	1	ECM13	1621.77	703.428	25299.4	11004.8	10.7476	10.08	0.505106	0.904163	ATCACGGGCGACG	ATCATGGGCGACG	1	1	1	1	0	1	0
53589	2	136270	2	156062	1	1	ECM13	1464.78	734.906	21674.2	11751.5	9.80863	9.80863	0.597015	0.597015	GGCATTTCGCACG	GGCATTTCGCACG	1	1	0	4	1	0	0
57403	2	113571	2	133345	1	1	PTH2	903.485	801.612	13025.4	11960.6	9.43675	9.43675	0	0	ATAAACTCAAAGG	ATAAACTCAAAGG	0	0	0	0	0	0	0
57447	2	113528	2	133303	1	1	PTH2	1462.96	693.748	24090.5	13664.7	9.43675	9.43675	0.94344	0.899452	ATCACGCCTGACG	ATCACGTATGACG	1	1	2	4	0	0	1
59202	2	101805	2	121576	1	0	PRX1	785.207	204.573	11765	3491.14	8.4751	11.3052	0	0	AAACAA-TCAACG	AAACAAATCAACA	0	0	2	1	0	0	0
59253	2	101754	2	121533	1	0	PRX1	974.783	151.899	16491.5	2418.21	6.51231	10.1408	0	0	CGCACAGTGCGCG	CGCTT-GCGCGCG	0	0	4	2	0	0	0
59609	2	101434	2	121211	1	1	PRX1	1386.78	2012.61	20476.4	30984.2	6.54941	10.0525	0	0	ATATTCCTGATAG	ATAT---------	0	0	9	5	0	0	0
59651	2	101393	2	121170	1	1	PRX1	1609.88	1153.14	25273.2	18816.7	9.70093	10.1896	0.956012	0.956012	GTCACCCAGGACG	GTCACCCAGGACG	1	1	0	3	0	0	1
60040	2	100297	2	120074	1	1	SEF1	2945.78	2189.97	43057.8	37473.8	9.83373	9.07399	0.750982	0.790259	CTCATCTCGTACG	CTCACTTCGTACG	1	1	2	0	0	0	0
60085	2	100252	2	120029	1	1	SEF1	1603.98	2753.72	27888.7	40855.4	9.83373	9.07399	0.750982	0.790259	CTCATCTCGTACG	CTCACTTCGTACG	1	1	2	0	0	0	0
62509	2	87986	2	107814	0	1	AAR2	385.177	808.288	5436.61	13980.4	4.88964	5.54974	0	0	ATCTTATACCAAA	GTCTATTACAA--	0	0	6	3	0	0	0
62570	2	87928	2	107753	1	1	AAR2	746.206	1529.46	11083.4	24145.5	8.01976	8.01976	0	0	GTTCTTATAAAAG	GTTCTTATAAAAG	0	0	0	1	0	0	0
62616	2	87883	2	107707	0	1	AAR2	652.246	762.82	9912.15	11092.1	8.76001	8.76001	0.965434	0.94344	ATCGCGACGCACG	ATCGCGACACACG	1	1	1	0	0	0	1
63675	2	84470	2	104297	1	1	ILS1	691.714	1439.81	11933.8	22237.2	11.3052	11.3052	0	0	ATAATCAATCAAC	-TAATCAATCAAC	0	0	1	0	0	0	0
64474	2	75094	2	94901	1	1	PET112	1322.53	1929.71	21889.7	30712.5	9.80863	13.3884	0	0	ATTTTTCGAGATG	ATTTTTCGAGATG	0	0	0	1	0	0	0
64513	2	75058	2	94862	1	1	PET112	1583.78	1887.09	27787.6	33063.7	9.80863	13.3884	0.882169	0.838181	ATCGTGTTGCACG	ATCGTTTTACACG	1	1	2	5	0	0	1
65866	2	63518	2	83382	0	1	YBL086C	39.6381	719.405	631.578	10038.7	9.43675	7.05378	0.562451	0.562451	AGCCTTTCTTACG	AGCCTTTCTTACG	1	1	0	1	1	0	0
68949	2	40607	2	60482	0	1	BRN1	101.642	1311.63	4068.29	18980.5	9.06283	6.11889	0	0	TTATTAAAATAAG	TCATTAGAATAAG	0	0	2	4	0	0	0
69028	2	40686	2	60535	0	1	BRN1	454.268	858.723	8448.09	16708.8	6.51531	6.21476	0.921446	0.921446	ATCACGCGAAACG	ATCACCCGAAACG	1	1	1	5	0	0	1
74430	2	21421	2	47810	1	1	SEA4	1459.27	1981.69	21891.4	33886.1	6.90458	6.74326	0	0	CATATACCAAACG	CATATAGTAGACG	0	0	3	5	0	0	0
74478	2	21373	2	47763	1	1	SEA4	1499.41	2100.19	22716.8	31590.8	8.11754	8.11754	0.816179	0.816179	ATCATACTTTACG	ATCATACTTTACG	1	1	0	0	0	0	1
82202	2	258178	2	273173	1	1	IPP1	884.557	902.8	14088.4	14464.9	9.21923	9.21923	0.894733	0.894733	GTCATCGCAGACG	GTCATCGCAGACG	1	1	0	0	0	0	1
83008	2	270105	2	279562	0	1	MNN2	616.215	710.237	9866.32	10788.6	5.87921	6.31512	0	0	GAAGCTATAAAAG	GAAGCTATAAAAG	0	0	0	0	0	0	0
83068	2	270045	2	279502	1	1	MNN2	979.748	1037.66	13915.4	15755.7	8.80749	8.80749	1	1	GTCGCGCCCGACG	GTCGCGCCCGACG	1	1	0	0	0	0	1
89516	2	292327	2	301841	0	1	OLA1	302.421	1785.36	5210.46	27900.4	7.12767	7.42363	0	0	TTAGGTTTCTACG	TTAGGTTTCTACG	0	0	0	1	0	0	0
89688	2	292173	2	301677	1	1	OLA1	784.359	1412.56	12772.7	21836.6	7.74011	8.16642	0.82875	0.806756	GTCATTCAATACG	GTCATTTAATACG	1	1	1	1	0	0	1
91112	2	298134	2	307590	0	1	CDS1	411.15	1233.85	7839.17	22742.2	9.70093	9.70093	0.653574	0.653574	ATAGCGAAAAACG	ATAGCGAAAAACG	1	1	0	1	1	0	0
91285	2	297964	2	307421	1	1	CDS1	1281.45	1562.64	19808	26644.7	10.3478	9.49027	0.47604	0.47604	GTGCCTGAAAACG	GTGCCTGAAAACG	1	1	0	4	1	0	0
91329	2	297922	2	307379	1	1	CDS1	927.973	1040.03	12243.6	13597.5	8.28099	9.49027	0.82875	0.838181	GTCATTATCAACG	ATCATTATCGACG	1	1	2	0	0	0	1
97177	2	324291	2	333718	1	1	QDR3	767.68	823.362	13437.6	13197	9.06161	9.06161	0	0	AAAGTATGTAAGG	AAAGTATGTAAAG	0	0	1	2	0	0	0
101320	2	342159	2	351937	1	0	YBR053C	854.044	575.825	14549.9	9670.01	9.43675	7.86731	0.921446	0.956012	ATCACGGCATACG	GTCACGGCACACG	1	1	2	0	0	0	1
104412	2	360586	2	370751	1	0	AKL1	832.867	68.8373	12287.7	1372.1	10.3477	5.98733	0.622152	0	GTATCTTAAAACG	GTATCTTGAAAAG	1	0	2	3	0	1	0
116543	2	392498	2	402559	0	1	SLM4	415.563	1035.55	6803.87	16905.5	8.21919	8.21919	0	0.566378	TCGCAGATTTTAC	CTACCGA-TGAAC	0	1	7	0	0	0	0
116582	2	392459	2	402521	0	1	SLM4	251.664	924.171	3896.92	14017	8.16642	8.16843	0.816179	0.566378	ATCATTATCAACG	ATCATCATCAACG	1	1	1	3	0	1	0
117458	2	401038	2	411088	1	1	SEC18	984.204	1865.23	17016.4	34796.7	9.89418	9.89418	0	0	TGACGCTA-CGCT	TGACGCTAACGCA	0	0	2	3	0	0	0
117501	2	400996	2	411045	0	1	SEC18	482.659	1620.84	8350.14	21280.5	8.16843	8.16843	0.877458	0.877458	ATCACACTATACG	ATCACACTATACG	1	1	0	2	0	0	1
125343	2	444933	2	454923	0	1	FES1	177.31	1184.45	3778.1	19652.8	5.44906	6.67186	0	0	CTAACCTATTTCC	GTAGTCTATTGCA	0	0	5	3	0	0	0
125369	2	444907	2	454903	1	1	FES1	1152.9	1075.96	19131.9	18872.4	8.16642	9.06161	0.816179	0.877458	ATCATTTCAAACG	ATCACTTCAAACG	1	1	1	4	0	0	1
126541	2	452433	2	462482	1	1	VID24	1606.62	955.516	28537.7	17157.9	10.8161	10.8755	0	0	GCAGTGGCAAACG	GCAGTGGCAAACG	0	0	0	4	0	0	0
126587	2	452391	2	462436	1	1	VID24	2570.32	866.079	42604.8	19725.6	10.8161	10.8755	0.877458	0.601728	ATCACTTTACACG	AGCACTTTGTACG	1	1	3	1	0	1	0
126624	2	452354	2	462399	1	0	VID24	2093.09	432.474	27261.7	6891.96	8.83697	10.3478	0.860175	0.94344	ATCGTTCTGAACG	ATCGCTCTGCACG	1	1	2	1	0	0	1
127492	2	458758	2	468821	1	1	CMD1	5554.93	5408.19	76041.6	77560	11.2505	11.3052	0	0	TGA-CCAATTAAC	TGAGCCAATTAAC	0	0	1	2	0	0	0
127535	2	458716	2	468780	1	1	CMD1	4626.24	4283.2	70257.6	68255.6	11.2505	11.2505	0.860175	0.860175	ATCATCTTGCACG	ATCGTCTTGTACG	1	1	2	1	0	0	1
127745	2	458510	2	468576	1	1	CMD1	2486.76	2041.99	37772.4	31092.4	9.39237	10.1408	0.899452	0.912016	ATCACAGTACACG	GTCACAGTACACG	1	1	1	3	0	0	1
132465	2	477278	2	487558	1	0	TEF2	1149.08	204.742	19515.3	3350.02	10.8755	10.8755	0.750982	0	CTCTTGTACGACG	CTCTTGTACGACA	1	0	1	1	1	1	0
132514	2	477327	2	487607	1	1	TEF2	1290.87	862.558	20828.9	12319.9	10.8755	10.8755	0.750982	0	CTCTTGTACGACG	CTCTTGTACGACA	1	0	1	1	0	0	0
134142	2	483662	2	493940	1	1	GRS1	1301.48	1884.38	18838	25696.6	11.2505	11.2505	0	0	AAGCTCACTTACG	AAACTCAAATAGG	0	0	4	3	0	0	0
134182	2	483622	2	493900	1	1	GRS1	951.569	1074.83	12590.1	16350.5	11.2505	11.2505	0.816179	0.816179	ATCATTTTCTACG	ATCATTTTCTACG	1	1	0	0	0	0	1
134537	2	484678	2	495009	1	0	MRPL36	744.127	405.24	13280.5	9449.3	9.06283	6.82211	0	0	ATATCAAAATATG	GTATC-AAATA--	0	0	4	4	0	0	0
134559	2	484661	2	494988	0	1	MRPL36	517.799	1888.41	12317.7	33866.9	9.06283	7.12767	0.899452	0.921446	ATCGCTCTTTACG	-TCGCTCTCTACG	1	1	2	4	0	0	1
134606	2	484614	2	494942	1	1	MRPL36	805.663	2067.07	14323.5	28296.1	9.80863	7.12767	0.899452	0.921446	ATCGCTCTTTACG	-TCGCTCTCTACG	1	1	2	4	0	0	1
136991	2	495511	2	505846	1	1	OPY1	3695.55	1747.26	63713.8	33684.2	7.42202	7.45247	0	0	ATAATAGAACAAA	ATAACAGAACAAA	0	0	1	4	0	0	0
137044	2	495458	2	505794	1	1	OPY1	4694.78	2754.81	87610.6	52375	7.68371	7.40892	0.912016	0.934017	GTCACTCACAACG	GTCACTCGCAAC-	1	1	2	1	0	0	1
143731	2	535067	2	545415	1	1	MRPS9	3149.87	2376.74	52870.1	41540.3	11.3052	11.3052	0.794185	0.794185	ATCATTTTATACG	ATCATTTTATACG	1	1	0	5	0	0	1
143781	2	535114	2	545458	1	0	MRPS9	2410.5	534.751	32109.6	20867.1	8.16642	7.46334	0.794185	0.794185	ATCATTTTATACG	ATCATTTTATACG	1	1	0	5	0	0	1
151157	2	561049	2	571367	0	1	CSH1	304.076	1037.64	4701.57	17217.5	8.04121	6.76402	0	0	ATGCTACTGCACT	ATGCTACTGCATC	0	0	2	3	0	0	0
151241	2	561131	2	571447	1	1	CSH1	1079.95	1470.71	20032.5	21932.7	11.3052	7.45247	0.838181	0.877458	ATCGTCATATACG	ATCACCAAATACG	1	1	3	4	0	0	1
151785	2	565055	2	575411	0	1	TOS1	407.33	668.844	7193	11410.2	6.74049	7.0609	0.899452	0.921446	ATCACATACCACG	ATCACGTACCAC-	1	1	2	3	0	0	1
153787	2	576225	2	586659	1	0	SSE2	1958.18	504.405	28879.7	12983.7	8.34901	8.36088	0	0	TTG---GATGATT	TTAAAAGATGATT	0	0	4	1	0	0	0
153828	2	576184	2	586620	1	1	SSE2	1976.85	1857.36	30346.1	29009.6	8.34901	8.36088	0.877458	0.890021	ATCACATCATACG	GTCACTTCATACG	1	1	2	4	0	0	1
155445	2	586476	2	596906	0	1	EHT1	497.725	2239.27	8952.31	37381.3	9.80863	10.8161	0	0	AAATCAATATACA	ATATCAATATACA	0	0	1	1	0	0	0
155484	2	586437	2	596870	1	1	EHT1	904.207	1908.67	15288.1	33104.8	9.80863	10.8161	0	0.899452	TTCACTTTGCACG	ATCACGTTACACG	0	1	3	4	0	1	0
165211	2	618745	2	634447	0	1	TAF5	489.959	789.542	7414.66	11212	7.75551	10.8755	0	0	ATATTTCACTACA	CTATCCCATTGCT	0	0	6	1	0	0	0
165285	2	618671	2	634376	0	1	TAF5	567.75	838.719	9272.04	12875.7	8.11754	11.3052	0.816179	0.877458	ATCATCTTTTACG	ATCACCTTATACG	1	1	2	3	0	0	1
172016	2	645465	2	661984	1	0	ERV15	1161.43	120.849	19621.4	1797.72	8.16642	6.26389	0	0	ATTGCT--AAATA	ATTGTTGAAGATC	0	0	5	1	0	0	0
172304	2	647352	2	663814	1	0	AME1	1053.51	452.285	17703.5	7147.43	10.8755	7.91446	0.860175	0.860175	ATCGTGTTGTACG	ATCGTGTCATACG	1	1	2	2	0	0	1
172356	2	647301	2	663764	1	0	AME1	1002.24	316.23	17283.8	5927.21	10.8755	7.45247	0.860175	0.860175	ATCGTGTTGTACG	ATCGTGTCATACG	1	1	2	2	0	0	1
173005	2	651170	2	667668	1	1	SDS24	3744.82	3809.16	71117.3	71724	7.08628	7.08628	0.812253	0.934017	GTCGCTCAAGACG	GTCGCTCAAGACG	1	1	0	0	1	1	0
173069	2	651234	2	667732	1	1	SDS24	2710.58	2593.04	44550.7	43708.9	8.80749	8.80749	0	0	CTCCTCTTTTAAG	CTCCTCTTTTAAG	0	0	0	0	0	0	0
174181	2	662786	2	679299	1	0	PYC2	1542.32	180.795	23428.4	5425.75	10.7219	11.3052	0	0	AATATACTATACG	TGTATATTATACG	0	0	3	3	0	0	0
174215	2	662754	2	679267	1	1	PYC2	1254.58	725.226	23758.3	14566.9	11.6091	10.3477	0.838181	0.899452	GTCACTAACGACG	ATCACTAGCAACG	1	1	3	4	0	0	1
174279	2	662700	2	679205	1	0	PYC2	1327.75	633.592	21883.5	11364.3	6.7805	7.60215	0	0	TAAGGGACA--CG	TAAT--ACATTCG	0	0	5	2	0	0	0
175726	2	668612	2	685108	0	1	PCS60	13.9625	2492.19	320.033	38580.4	10.3477	10.3477	0	0.860175	ATAAAC-TTC-AG	AT---CGTTCTAG	0	1	5	3	0	1	0
175812	2	668532	2	685034	0	1	PCS60	348.637	1609.43	6373.33	29852.9	6.89508	6.04213	0.592302	0.592302	ATAGTTAAAGACG	ATAGTTAAAGACG	1	1	0	0	1	0	0
180236	2	697724	2	714245	1	0	YBR238C	1777.64	528.202	25761.4	7768.83	7.71295	9.96482	0.934017	0.956012	GTCCCTTCACACG	GTCCCTTCGGACG	1	1	2	1	0	0	1
180296	2	697664	2	714185	1	0	YBR238C	1941.37	475.721	34088.2	8202.19	10.8755	10.8755	0	0	CGAGCAGTTCACT	CGAGTAGTTAACA	0	0	3	0	0	0	0
192623	2	761118	2	777512	0	1	PAF1	356.615	717.081	6647.4	9805.41	10.8161	7.76753	0.877458	0.921446	ATCACATTACACG	ATCACACCACACG	1	1	2	3	0	0	1
193335	2	768088	2	784483	1	0	DUG2	916.599	635.831	13767.3	9332.38	9.43675	7.0609	0.899452	0.921446	ATCACGTTTCACG	ATCACGTTCCACG	1	1	1	1	0	0	1
194341	2	770795	2	787171	1	1	SSH1	1161.39	4768.61	19424.1	71264.1	8.83697	8.16642	0	0	TAAACCTAAGACG	CAAACCTAAGACG	0	0	1	2	0	0	0
194380	2	770756	2	787133	0	1	SSH1	83.0533	3578.81	1527.25	63313.2	10.8161	10.8161	0.838181	0.860175	ATCATTAGACACG	ATCATTAGGCACG	1	1	1	3	0	0	1
194416	2	770722	2	787097	1	1	SSH1	1518.94	2659.1	26910.4	40479.2	10.8161	10.8161	0.877458	0.877458	ATCACTTTACACG	ATCACTTTACACG	1	1	0	3	0	0	1
196023	2	782437	2	798763	1	1	BSD2	1035.94	1482.53	17302.6	21347.1	11.3052	11.3052	0.838181	0.838181	ATCGTGTTATACG	ATCGTGTTATACG	1	1	0	1	0	0	1
196069	2	782483	2	798809	1	0	BSD2	1061.15	605.166	15973.3	12202.7	11.3052	11.3052	0.838181	0.838181	ATCGTGTTATACG	ATCGTGTTATACG	1	1	0	1	0	0	1
196090	2	782503	2	798828	0	1	BSD2	376.222	966.436	9050.43	16141.5	5.02178	5.91377	0	0	GGACTCCGCATCG	GGACTCCGCATCG	0	0	0	0	0	0	0
204400	3	104532	3	129308	1	1	SGF29	3406.03	1743.05	52324.8	28464.6	12.1345	12.1345	0	0	CATCTATATAACG	CATCTATATAACG	0	0	0	0	0	0	0
204447	3	104485	3	129261	1	1	SGF29	3005.11	1662.04	45088.4	22977.6	12.1345	12.1345	0	0	GTACGTTTGTACG	GTACGTTTGTACG	0	0	0	2	0	0	0
204697	3	103538	3	128313	1	0	GBP2	926.997	271.875	14927.6	7138.56	8.11754	7.25626	0	0	ATGGTGGTTAACA	ATGTTGGTTAATA	0	0	2	3	0	0	0
204719	3	103517	3	128293	0	1	GBP2	548.44	1029.15	11725	15879.6	9.21923	7.31039	0	0	ATCTTATGATATG	AACTCACGTCATG	0	0	5	1	0	0	0
204756	3	103480	3	128258	1	0	GBP2	1115.09	596.593	20240.1	11099.8	9.21923	7.31039	0.921446	0.921446	ATCACTTCCGACG	ATCACATCCGACG	1	1	1	4	0	0	1
205571	3	94501	3	119314	0	1	NFS1	502.606	1553.52	7964.79	21150.3	6.82211	6.27942	0	0	ATATCT--ATCAT	ATATATACATCGT	0	0	4	1	0	0	0
205636	3	94436	3	119249	0	1	NFS1	258.411	1407.4	4891.53	22621.3	9.89418	8.36088	0	0.868027	GTCACTATCAACT	GTCACTTTTAACG	0	1	3	1	0	1	0
209221	3	65745	3	96125	1	1	RRP7	1679.61	1194.96	25856.6	21921.8	10.1896	9.43675	0	0	CACTCTTGCTACT	TCCTCCTGCTAC-	0	0	4	2	0	0	0
209256	3	65710	3	96090	1	1	RRP7	1101.55	846.31	19014	14943.2	9.06161	9.43675	0.899452	0.899452	ATCACTTCGAACG	ATCACGTCAAACG	1	1	2	5	0	0	1
209287	3	65679	3	96059	1	0	RRP7	1144.5	273.964	21823	6421.87	8.10111	6.5668	0	0	AATTTAACTTACG	AATTTAACTCATA	0	0	3	0	0	0	0
209758	3	61547	3	91947	1	1	GRX1	2698.36	1898.99	37759.5	30820.6	11.2505	10.8161	0	0	ATCCTTTCTAAGG	ATTCTTCCTTAGG	0	0	3	4	0	0	0
209804	3	61504	3	91901	1	1	GRX1	1436.73	932.593	24525	17081.4	11.2505	10.8161	0.877458	0.877458	ATCACTTTACACG	ATCACTTTACACG	1	1	0	5	0	0	1
211630	3	52493	3	82894	1	1	GID7	1813.68	1700.58	28389.7	25598.2	11.3052	8.11754	0	0	ACGTTCTTATACG	AA---CATATACA	0	0	6	2	0	0	0
211673	3	52536	3	82937	1	1	GID7	1849.24	1962.15	30135.5	33307.9	8.11754	8.11754	0.860175	0.838181	ATCATCGGAAACG	ATCATCAGAAACG	1	1	1	1	0	0	1
212874	3	48543	3	79051	1	1	MGR1	3113.67	2012.5	47687.7	31640.9	10.6124	8.72652	0	0	TTATCTTTTTATG	CTATTTTTT---G	0	0	5	2	0	0	0
212914	3	48503	3	79011	1	1	MGR1	3669.41	2659.44	50053.9	37347.9	10.6124	8.72652	0.934017	0.921446	GTCACACTGCACG	ATCACACTGCACG	1	1	1	1	0	0	1
213159	3	47075	3	77584	1	1	EMC1	2835.99	3578.07	51080.2	69082.3	10.7219	8.16327	0	0	GTCTTTGCGGATT	GTCTTTGCTAATT	0	0	2	1	0	0	0
213199	3	47035	3	77544	1	1	EMC1	1505.06	2764.75	26807.4	48595.7	10.7219	7.84015	0.921446	0.921446	ATCACGGTGTACG	ATCACGGTTCACG	1	1	2	1	0	0	1
213233	3	47001	3	77510	1	1	EMC1	1678.42	1342.06	24642.5	24413.5	6.54181	6.54181	0	0	ATATTTTCTCTGG	ATATTTTCTTTGG	0	0	1	1	0	0	0
218745	3	17132	3	47675	1	0	CHA1	708.096	107.244	13069.1	1907.13	7.1384	7.59425	0.94344	0.956012	ATCACCGCGAACG	GTCACCGCCAACG	1	1	2	3	0	0	1
219158	3	118537	3	143934	1	0	CDC10	911.846	626.277	15027.3	12796.4	7.3221	7.3221	0.838181	0	ATCGTATCATACG	ATCATATGATACG	1	0	2	3	0	1	0
219213	3	118483	3	143879	1	1	CDC10	755.203	818.227	12044.8	12809.5	7.3221	8.22494	0.838181	0.816179	ATCGTATCATACG	ATCATATGATACG	1	1	2	3	0	0	1
221083	3	122904	3	148342	1	0	CIT2	773.622	165.697	11541.2	3219.7	11.3052	11.3052	0	0	ACTGTGGAAGACG	AATGTGGAAGACC	0	0	2	2	0	0	0
222522	3	127865	3	154202	0	1	SAT4	584.428	1537.78	9733.53	28613.8	9.63438	7.21778	0.94344	0.505106	ATCACCTGGCACG	ATCACCTGGTACG	1	1	1	1	0	1	0
222578	3	127921	3	154257	0	1	SAT4	614.815	1030.95	10828.2	18062.7	8.76515	8.76515	0	0	TGATGAAATGACG	CGATGGAATGACG	0	0	2	1	0	0	0
224644	3	137256	3	163610	1	0	ADP1	1328.68	272.429	22952.9	5275.33	10.9008	7.062	0	0	GACACGCTCGACT	AACACGCTCGACT	0	0	1	0	0	0	0
224683	3	137221	3	163571	1	0	ADP1	1648.59	412.536	26031.1	6331.66	10.9008	6.76402	0.94344	0.912016	A-TCACGAGCGAC	AGTCACCAATGAC	1	1	4	1	0	0	1
235440	3	172637	3	200117	1	0	FEN2	1202.47	258.247	18939.3	4654.56	5.12821	6.03272	0	0	GGATCAATGGAGG	TGATTATAGG--G	0	0	6	3	0	0	0
235489	3	172589	3	200084	1	0	FEN2	1156.97	297.123	17029.2	5202.99	8.37958	8.87506	0.553024	0.57502	GGCATTTTTGACG	GGCATTTTCGACG	1	1	1	4	1	0	0
235516	3	172562	3	200057	1	0	FEN2	1220.89	607.489	19777.9	10419.7	7.16361	8.11754	0	0	TTCTTGTAATTCG	TTTTTGAAAT-CG	0	0	3	1	0	0	0
236542	3	176660	3	204161	1	1	SYP1	2340.94	3180.14	35989.8	52148.9	9.06283	8.16642	0	0	ATATTCTTATATA	AAGTTCTTATATA	0	0	2	3	0	0	0
236589	3	176614	3	204114	1	1	SYP1	2297.65	3561.9	40183	56012.8	8.08055	8.08055	0.94344	0.921446	ATCACGGGCTACG	ATCACGGACTACG	1	1	1	2	0	0	1
238249	3	186105	3	213651	1	1	SNT1	2288.57	1376.29	37850	25146.4	7.08608	6.81411	0.626866	0.60487	GTAATTGCGTACG	GTAATTGCATACG	1	1	1	0	1	0	0
238308	3	186163	3	213709	1	1	SNT1	2012.25	784.895	35695.1	13231.7	8.16642	8.16642	0.838181	0.838181	ATCATTACCAACG	ATCATTACCAACG	1	1	0	0	0	0	1
239162	3	193167	3	220699	1	1	RRP43	679.11	1260.63	12122.9	22286.8	8.87506	7.36079	0	0	GGGTTTATATCCG	GGGCTTATATCCG	0	0	1	2	0	0	0
239200	3	193129	3	220661	1	1	RRP43	851.2	1240.57	11860.6	17676.8	8.87506	7.36079	0.921446	0.877458	ATCACAGTCGACG	ATCACAATCAACG	1	1	2	4	0	0	1
244237	3	216470	3	244011	1	1	THR4	1247.2	1297.23	19407.8	21875.1	9.80863	12.1345	0	0	CTATAACATCACT	CTATAACATTACT	0	0	1	2	0	0	0
244286	3	216519	3	244059	1	1	THR4	938.2	1393.58	15382.4	22493.8	9.89418	12.1345	0.912016	0.912016	GTCACTACTCACG	GTCACTACTCACG	1	1	0	1	0	0	1
245713	3	224931	3	252468	1	0	YCR061W	1059.66	573.989	17567.3	10380.5	6.54258	5.31153	0	0	ATTGTTTT--TCT	TTTGTTTTGTTCG	0	0	4	5	0	0	0
245908	3	225102	3	252648	1	1	YCR061W	1198.9	1005.78	21009.7	18634.3	5.74824	5.9408	0	0	AGTTTC--GTACT	AGTTTCATGTAAT	0	0	3	6	0	0	0
246070	3	225250	3	252794	0	1	YCR061W	131.009	1292.22	2123.69	21716.4	8.24355	8.24355	0	0	ATAGATGAAAACT	ACAGAT-AAAATC	0	0	4	4	0	0	0
246106	3	225285	3	252830	1	1	YCR061W	764.794	1967.48	13602.1	25321.2	10.0525	8.24355	0	0.645719	AGCACGATCCATG	AGCACGATCCACG	0	1	1	3	0	1	0
247284	3	228186	3	255777	1	1	BUD31	2306.31	1635.51	33667.6	25481.7	7.73473	7.68371	0.872739	0.872739	GTCGTTCACAACG	GTCGTTCACAACG	1	1	0	0	0	0	1
247340	3	228239	3	255833	1	0	BUD31	1247.07	254.665	18423.1	6204.37	6.5668	6.5668	0.872739	0.872739	GTCGTTCACAACG	GTCGTTCACAACG	1	1	0	0	0	0	1
249801	3	240694	3	268340	1	1	IMG2	2265.86	2240.04	32315.7	34061	9.07399	9.91254	0.894733	0.894733	GTCATCGCGTACG	GTCATCGCGTACG	1	1	0	2	0	0	1
249860	3	240639	3	268282	1	1	IMG2	1188.63	1556.53	23326.4	27115	6.891	8.16642	0	0	AGCCATTCGTACG	ATCC-TTCGTACG	0	0	2	2	0	0	0
250602	3	246681	3	274331	0	1	SSK22	89.9284	671.041	1362.04	10736.9	7.729	8.2127	0	0.666143	GCAACAACATACG	GTAACAACGTACG	0	1	2	0	0	1	0
251818	3	258737	3	286345	1	1	AHC2	1099.04	2738.37	16715.7	44108.6	8.28099	8.16642	0.850744	0.838181	GTCATTTGGTACG	ATCATTTGGTACG	1	1	1	3	0	0	1
251867	3	258786	3	286391	1	1	AHC2	1026.94	2439.73	16712	37072	8.28099	8.16642	0.850744	0.838181	GTCATTTGGTACG	ATCATTTGGTACG	1	1	1	3	0	0	1
260827	3	310832	2	31293	1	1	RDS1	2196.01	2358.59	31828.4	37004.5	11.2505	8.08055	0.850744	0.82875	GTCATTGAGAACG	GTCATTAAGAACG	1	1	1	2	0	0	1
260878	3	310883	2	31249	1	1	RDS1	1101.8	3196.94	21889.9	46623.8	7.51679	7.55439	0.850744	0.82875	GTCATTGAGAACG	GTCATTAAGAACG	1	1	1	2	0	0	1
267278	4	431656	4	434285	0	1	YDL012C	544.069	823.428	9453.64	13746.7	6.99962	9.39808	0.816179	0.838181	ATCGTTTAATACG	ATCGTTTCTTACG	1	1	2	4	0	0	1
267342	4	431593	4	434221	0	1	YDL012C	323.046	688.631	6068.4	11343.4	7.4353	7.4353	0	0	ATCAGCGGCATCG	ATCGGCGGCATCG	0	0	1	1	0	0	0
268006	4	428825	4	431469	1	1	SLX5	2551.01	3124.35	38750.7	49854.2	7.33247	11.3052	0	0	CTCTTACGTATTT	CTATTACGTATAT	0	0	2	5	0	0	0
268049	4	428868	4	431512	1	1	SLX5	2675.36	2933.68	43628	46301.6	7.33247	11.3052	0.877458	0.794185	ATCACTGTATACG	ATCATTTTATACG	1	1	2	1	0	0	1
268328	4	427099	4	429712	1	1	TSC13	1427.78	965.582	20786.1	16886	10.8755	9.07399	0	0	CTTTTTCTTGAAA	CTTTTTCTTGAAA	0	0	0	1	0	0	0
268367	4	427062	4	429675	1	1	TSC13	935.357	790.054	17064.6	13138.2	10.8755	9.07399	0.816179	0.860175	ATCATTTTGTACG	ATCGTTTCGTACG	1	1	2	3	0	0	1
271233	4	417083	4	419639	1	1	RPN4	948.852	872.093	15080.9	14034	10.1896	11.2505	0.877458	0.816179	ATCACTGTAAACG	ATCATTGTAAACG	1	1	1	1	0	0	1
277709	4	403538	4	406228	1	0	MPS1	1001.26	421.15	16307.2	7220.16	8.16642	9.44754	0.794185	0.816179	ATCATTTAATACG	ATCATTCTATACG	1	1	2	3	0	0	1
278901	4	392648	4	395330	1	1	GPR1	2200.34	723.607	35657.5	11915.1	11.3052	7.35475	0.877458	0.934017	ATCACCTTATACG	GTCACACTCCACG	1	1	5	1	0	0	1
278945	4	392604	4	395286	1	1	GPR1	1793.77	842.132	31151.6	19140.3	11.3052	10.1896	0.877458	0.934017	ATCACCTTATACG	GTCACACTCCACG	1	1	5	1	0	0	1
279109	4	392444	4	395131	0	1	GPR1	327.799	761.821	5036.46	12239.9	7.01557	9.06283	0	0	--AATGAACTACT	CGAATT---TAAT	0	0	7	0	0	0	0
283369	4	371031	4	372489	1	1	NPC2	1922.57	1686.67	26009.4	23342.6	8.24355	7.89421	0.636292	0	GGCACGATGAACG	CCCACGATGACCG	1	0	3	3	0	0	0
283422	4	371084	4	372542	1	1	NPC2	2378.58	1639.46	41483.8	28515.9	8.10111	8.16327	0.636292	0.978006	GTCACCTCCCACG	GTCACCGCGCACG	1	1	2	4	1	1	0
286080	4	363782	4	365258	1	0	SLC1	1169.11	436.91	21534.3	6867.71	7.89421	7.89421	0	0	ATATTGCGATGAG	ATATTGCGATGAG	0	0	0	2	0	0	0
286147	4	363715	4	365192	1	1	SLC1	1182.31	744.014	18895	12716	8.11754	8.72652	0.838181	0.882169	ATCATCATTCACG	ATCATCGTGCACG	1	1	2	2	0	0	1
286461	4	362565	4	364035	1	1	PBP4	2276.39	3148.19	34977.2	48022.6	11.2505	11.2505	0.877458	0.877458	ATCACTTCTTACG	ATCACTTAGTACG	1	1	2	5	0	0	1
286507	4	362520	4	363989	1	1	PBP4	1299.87	1880.01	22502.3	28817.1	11.2505	11.2505	0.877458	0.877458	ATCACTTCTTACG	ATCACTTAGTACG	1	1	2	5	0	0	1
290599	4	341383	4	342543	1	1	RPS29B	1913.28	896.167	29979.2	15227.7	10.8755	10.8755	0.812253	0.790259	CTCGCGTTGTACG	CTCGCTTTGTACG	1	1	1	3	0	0	0
290647	4	341335	4	342496	1	0	RPS29B	869.109	262.599	14507.3	5222.32	10.8755	10.8755	0.812253	0.790259	CTCGCGTTGTACG	CTCGCTTTGTACG	1	1	1	3	0	0	0
291522	4	340396	4	341564	0	1	SYO1	318.972	1006.5	6074.69	15199.4	10.3477	8.36088	0	0	ATGTTTAGTGATG	ATATTGAG---TG	0	0	5	2	0	0	0
291544	4	340374	4	341544	1	0	SYO1	1681.35	179.109	30130.8	6526.66	7.22164	8.36088	0	0	ATAGTACTGCCCT	ATACTATTGCCGT	0	0	3	2	0	0	0
291583	4	340335	4	341505	1	1	SYO1	1890.91	934.555	34651.2	13486.4	7.22164	7.22164	0.816179	0.816179	ATCATTTAGAACG	ATCATTTGAAACG	1	1	2	1	0	0	1
292932	4	330699	4	331862	1	1	YET3	1032.16	823.922	16087.8	12080.2	6.63487	6.63487	0	0	GTAATATTGTACT	GCAATAATATACA	0	0	4	2	0	0	0
292964	4	330669	4	331830	1	1	YET3	720.827	931.443	12456.3	15729.1	6.63487	6.63487	0.584446	0.584446	AGCGTTGTTGACG	AGCGTTGTTGACG	1	1	0	1	1	0	0
293043	4	330592	4	331752	0	1	YET3	502.139	751.563	9346.18	13607.6	7.32323	7.75551	0	0	TA-GCTAAAAAAA	TAAGCTAAAAAAA	0	0	1	2	0	0	0
293081	4	330554	4	331714	1	0	YET3	778.799	515.771	10986.5	6867.75	7.32323	7.32323	0	0	CTTCCCCTTAATG	CTTCCCCTTAGCG	0	0	2	0	0	0	0
293301	4	326361	4	327531	1	1	BRE1	2385.03	1707.42	41848.5	28706.8	8.36088	8.36088	0	0	TCAAAG---TACG	TTAAAGACATGCG	0	0	5	2	0	0	0
293358	4	326304	4	327475	1	1	BRE1	2846.64	2731.45	43617.9	41092.4	5.89912	6.79103	0.899452	0.899452	ATCACATCCAACG	ATCACATCCAACG	1	1	0	2	0	0	1
296631	4	310368	4	311517	1	1	RPP1A	2301.09	1348.16	41748.1	26004.2	9.07399	10.7219	0.882169	0.860175	ATCGTGAGGTACG	ATCGTGATGTACG	1	1	1	5	0	0	1
296690	4	310309	4	311464	1	1	RPP1A	1945.24	1507.71	33674.6	26288.9	8.83697	7.51679	0.644148	0.622152	GTATCATCTTACG	GTATCTTTTTACG	1	1	2	2	0	0	0
297710	4	304925	4	306063	1	1	SUB2	1697.94	2488.09	30114.7	37981.1	6.83074	6.83074	0	0	ATGATAGTAAACA	ATGAT-GTAAACG	0	0	2	0	0	0	0
297768	4	304982	4	306121	1	1	SUB2	3171.81	3757.28	52744	50847	9.06283	9.06283	0.877458	0.899452	ATCACTGTTAACG	ATCACCTTGAACG	1	1	3	2	0	0	1
299816	4	292634	4	293725	1	1	SRP14	1691.07	935.898	27536.4	17760	10.7476	10.7476	0	0	ATCGCCCTAAATT	-------------	0	0	13	9	0	0	0
299858	4	292676	4	293767	1	0	SRP14	931.24	585.782	17073.8	11308.1	10.7476	10.7476	0.860175	0.860175	ATCCTTTTGCACG	ATCCTTTTGCACG	1	1	0	1	0	0	1
300740	4	286821	4	287993	1	0	RPN6	897.162	422.794	12003.3	7566.52	6.37734	6.45326	0	0	CCCATTTATATCG	CCCATTG-TCTCG	0	0	3	2	0	0	0
302609	4	272253	4	273439	1	1	PHO2	1340.23	2026.55	21004.1	37891.6	6.63487	6.76402	0	0	GAAACGCGCAACG	GAAACGCGCAACG	0	0	0	0	0	0	0
302792	4	272077	4	273265	1	1	PHO2	1581.87	2197.45	23134.8	33095.7	9.96482	10.7219	0	0	ATGATAGTAAATG	--GAAAGACAGTG	0	0	6	5	0	0	0
302834	4	272035	4	273223	1	1	PHO2	1109.74	1042.63	15936.6	16184.2	9.96482	9.06283	0.921446	0.899452	ATCACTTCGGACG	ATCACTCTTGACG	1	1	3	2	0	0	1
306428	4	251379	4	252584	1	1	NUP84	913.204	1164.48	17792.5	21733.8	10.3477	8.16642	0	0	ATCATTAAATAAT	ATCATTAAGTGAT	0	0	2	2	0	0	0
306473	4	251423	4	252629	1	1	NUP84	670.07	1172.76	12678	18797	10.3477	8.16642	0.855456	0.794185	ATCACTAAATACG	ATCATTAAATACG	1	1	1	2	0	0	1
307502	4	245758	4	246920	1	1	EXP1	725.453	1707.12	17441.6	29624.8	6.26389	7.11999	0	0	GTAACCGTAAATG	GCAACCGCTAATA	0	0	4	1	0	0	0
307563	4	245699	4	246860	0	1	EXP1	454.183	1464.25	7537.35	21243.2	11.2505	10.3477	0.877458	0.877458	ATCACTGAATACG	ATCACTAAGTACG	1	1	2	4	0	0	1
307589	4	245673	4	246834	1	1	EXP1	796.878	1010.24	14507.5	16992.8	6.8447	5.91377	0	0	TTCAAAAAAC--C	TTCAATAAAATTC	0	0	4	2	0	0	0
308101	4	242142	4	243329	1	0	UBP1	2407.74	499.096	45045.8	11329.8	6.98598	7.45247	0.544383	0.653574	ATAGCAGAATAC-	A--GCAGAATACG	1	1	3	6	0	0	0
308148	4	242189	4	243374	1	1	UBP1	2324.94	1031.46	31961.8	15866.9	8.28099	8.28099	0.850744	0.850744	GTCATTCTGTACG	GTCATTCTCTACG	1	1	1	3	0	0	1
313129	4	227172	4	228311	0	1	LYS21	295.97	810.335	5196.24	13348.2	8.36088	8.36088	0	0	CTGTTCCACCACT	TTATTTCATGACT	0	0	5	2	0	0	0
313174	4	227217	4	228356	0	1	LYS21	385.474	1319.28	6506.67	21379.2	8.83697	8.08055	0.899452	0.899452	ATCACACACAACG	ATCACATCCAACG	1	1	2	4	0	0	1
314211	4	222195	4	223383	1	0	SRF1	725.156	485.34	11803.1	8597.74	6.24199	6.24199	0.562451	0.562451	AGCATTCTGAACG	AGCATTCTGAACG	1	1	0	1	1	0	0
314721	4	221422	4	222596	1	1	PPH21	1715.94	865.441	28900.7	16975.2	9.80863	10.8755	0.899452	0.877458	ATCACTTTGCACG	ATCACATTGTACG	1	1	2	4	0	0	1
314778	4	221365	4	222539	1	1	PPH21	1896.94	1267.68	27786.8	18139.6	9.80863	10.8755	0.899452	0.877458	ATCACTTTGCACG	ATCACATTGTACG	1	1	2	4	0	0	1
315622	4	215835	4	216971	0	1	ARF2	267.409	779.796	4650.64	11527.9	9.00721	5.533	0	0	TGATTTTTCCTCG	TGA-TTTTCCTCA	0	0	2	4	0	0	0
315717	4	215910	4	217059	1	1	ARF2	1238.8	2070.59	20415.6	31414.2	9.00721	7.55439	0.860175	0.838181	ATCATGTGGTACG	ATCATGTAGTACG	1	1	1	2	0	0	1
317303	4	211301	4	212483	0	1	RPO21	460.421	863.244	8017.08	13903.1	8.21919	6.2128	0	0	ATATATTCTGATG	ATATATTCTGACG	0	0	1	3	0	0	0
317378	4	211230	4	212409	0	1	RPO21	442.215	726.4	8017.76	11858.1	8.33343	8.37958	0.768264	0.768264	CTCACTAAAGACG	CTCACTAAAGACG	1	1	0	4	1	0	0
317955	4	199887	4	201080	1	1	YDL144C	858.457	677.567	13356.7	10158.9	8.4751	8.4751	0	0	ATAGCTAAGTGGG	GTATTAAAGTGAA	0	0	6	1	0	0	0
318028	4	199815	4	201007	1	1	YDL144C	1464.36	1080.16	23327.4	17935.4	9.06161	9.05234	0.921446	0.94344	ATCACTTGCCACG	ATCACTCGCCACG	1	1	1	2	0	0	1
318285	4	198582	4	199772	1	1	COP1	927.803	1465.57	15533.6	22080.7	11.3052	11.3052	0.934017	0.934017	GTCGCTCTGTACG	GTCGCTCTGTACG	1	1	0	0	0	0	1
320672	4	172277	4	173496	1	1	STE7	939.134	1048.48	13428.9	14032	7.05378	7.05378	0	0	ATCGCCCATTAGT	ATTGGCCATTAGT	0	0	2	1	0	0	0
320762	4	172367	4	173586	1	1	STE7	1411.91	1569.83	21012.7	24630.4	8.11754	7.42202	0	0	ATCACTTATAACG	ATCACTTATAACG	0	0	0	1	0	0	0
323097	4	158876	4	160135	1	1	UGX2	1094.46	1722.42	14545.3	23771	12.1345	12.1345	0.772976	0.750982	CTCGTTCCGAACG	CTCGTTCCAAACG	1	1	1	0	1	0	0
323144	4	158829	4	160089	0	1	UGX2	650.761	1610.86	11115	21258.6	12.1345	12.1345	0.772976	0.750982	CTCGTTCCGAACG	CTCGTTCCAAACG	1	1	1	0	0	0	0
327526	4	133184	4	134540	1	0	YDL183C	1307.67	0	19816.5	0	10.0525	8.09605	0.670856	0	GTAGTGGACGACG	A-----GAAGACG	1	0	7	3	0	0	0
327594	4	133124	4	134477	1	0	YDL183C	720.488	0	11297.3	0	6.9548	7.46334	0	0	ATTGCTGGGGAAT	ATTGCTGCGGAAT	0	0	1	2	0	0	0
327835	4	132889	4	134256	1	0	YDL183C	787.542	0	13649.3	0	8.33343	8.33343	0	0	AGAGTTCCCGTCG	CGAATTCCCGTCG	0	0	2	2	0	0	0
329576	4	121921	4	124569	1	1	UFD2	2271.08	1909.69	40214.7	33881	9.00721	9.00721	0.628437	0.628437	AGCGTCCTCGACG	AGCGTCCTCGACG	1	1	0	1	1	0	0
329653	4	121844	4	124492	1	1	UFD2	1888.75	3659.34	40462.6	46377.8	7.58443	7.58443	0.94344	0.94344	ATCGCCTCTGACG	ATCGCCTCTGACG	1	1	0	2	0	0	1
330972	4	116030	4	118628	1	1	ARF1	967.653	1440.58	16235.4	20653.1	8.21919	7.62607	0	0	AGCTCTCAAGAAG	AACCCACAAGAAG	0	0	3	5	0	0	0
331058	4	116116	4	118714	1	1	ARF1	1796.28	2272.54	26260.4	31078.9	12.1345	12.1345	0.855456	0.855456	ATCACATATAACG	ATCACATATAACG	1	1	0	1	0	0	1
331521	4	114426	4	117022	1	0	NUS1	678.134	577.805	9442.39	9717.07	9.49027	6.31384	0	0	ATCATAATTTTGG	ATCTTCATTTTAA	0	0	4	2	0	0	0
331548	4	114453	4	117049	0	1	NUS1	463.944	1194.21	9754.45	17189.3	9.49027	7.91454	0.485467	0	TGACTTCCGA-CG	TGACTTTCCAGCA	1	0	4	3	0	0	0
331594	4	114497	4	117095	1	1	NUS1	1308.4	1791.85	24450.9	33147.1	11.3052	11.3052	0.485467	0.82875	GTCATTATAAACG	GTCATTATCAACG	1	1	1	3	1	1	0
335771	4	87386	4	89902	0	1	CWC2	472.517	3146.28	8111.93	42375.9	9.06161	9.06161	0.838181	0.838181	ATCGTTACATACG	ATCGTTACATACG	1	1	0	3	0	0	1
335832	4	87325	4	89844	1	1	CWC2	692.987	2421.71	12686.4	40378.1	7.51679	7.51679	0	0	ATCGTTACATACG	ATCGTTACATACG	0	0	0	3	0	0	0
338433	4	77127	4	79671	1	0	PRR2	1033.94	605.443	15670.9	10467.2	7.42644	6.79103	0.838181	0.860175	ATCATGAAAGACG	ATCATGAAGGACG	1	1	1	1	0	0	1
339883	4	68902	4	71458	1	1	TIM22	1758.76	2217.99	26200.1	41549.8	7.1723	7.1723	0.592302	0	ATATTTTCGTACG	GTATTATCGTGCA	1	0	4	2	0	0	0
339944	4	68847	4	71397	1	1	TIM22	1918.16	2261.03	35437.9	39765.6	9.07399	10.8755	0.592302	0.675569	ATAACGGCGTACG	ATAACGTTGCACG	1	1	3	1	1	0	0
342217	4	56909	4	59514	1	1	WHI4	807.615	1510.08	13676.5	23991	8.83697	8.83697	0	0	TCAAA----AATC	-CATAGTGGAATC	0	0	6	7	0	0	0
342257	4	56869	4	59476	0	1	WHI4	581.5	974.623	9378.52	15324.3	8.83697	8.83697	0.750982	0.750982	ATCGTACCAAACG	ATCGTACCAAACG	1	1	0	1	1	0	0
342894	4	43770	4	46245	1	0	SSB1	670.113	240.548	9439.34	4324.49	5.77343	5.77343	0	0	TTTTTCAATAACA	TCTTTCAACAATA	0	0	3	1	0	0	0
342982	4	43852	4	46330	1	0	SSB1	727.703	128.079	10324.2	3737.58	7.46334	7.46334	0.838181	0.816179	ATCATTTCGAACG	ATCATGTTAAACG	1	1	3	6	0	0	1
348456	4	452862	4	454818	0	1	NTH1	164.664	693.303	2936.49	11026.3	9.39237	9.39237	0	0	AGCGGGAAGTACG	AGCGGGAAGAACG	0	0	1	1	0	0	0
348505	4	452813	4	454770	0	1	NTH1	502.478	943.489	8504.36	15625.6	9.39237	9.39237	0.882169	0.882169	ATCGTGTAGGACG	ATCGTGTAGGACG	1	1	0	1	0	0	1
350363	4	462476	4	464459	1	1	GAL3	2126.32	1632.87	31020.8	24891.1	7.73473	7.062	0	0	ATCTCTCAACACT	ATCTCTTAACACT	0	0	1	1	0	0	0
350410	4	462523	4	464506	1	1	GAL3	1874.7	1512.66	31749.5	26876.6	7.73473	7.062	0.540456	0.57502	AGCATTTTTGACG	GGCATTTCTGACG	1	1	2	2	0	1	0
353438	4	471642	4	473446	0	1	RPL4B	561.681	1196.81	10369.6	20171.3	7.35475	6.29395	0	0	ATTGCTAAGAACT	ACTGTTAGGGAGC	0	0	6	3	0	0	0
353485	4	471689	4	473492	0	1	RPL4B	162.16	1260.38	3067.83	17110.6	7.24026	8.71997	0.548311	0.548311	ATAATTATTTACG	ATAATTTTTTACG	1	1	1	3	1	0	0
359382	4	497581	4	499681	1	0	VPS54	1904.24	598.086	33038	11284.6	7.0594	6.82211	0	0	GAAGCTCAAGAAG	GGAGTTCAAGACG	0	0	3	1	0	0	0
359404	4	497560	4	499660	1	1	VPS54	1773.19	1363.94	29658.5	21687.8	8.76001	7.58985	0	0	GAACACACATACG	CAACTCAAATACT	0	0	4	1	0	0	0
359443	4	497523	4	499622	1	1	VPS54	2699.51	1523.98	41713.6	24165.1	8.76001	7.58985	0.860175	0.838181	ATCATTACCCACG	-TCATTACACACG	1	1	2	2	0	0	1
359709	4	501690	4	503821	1	0	REG1	1717.98	437.825	28040	11684.8	10.3478	10.1896	0	0	ATTATAAGAGCCG	ATTATAAGAGCCG	0	0	0	3	0	0	0
359758	4	501642	4	503777	1	1	REG1	3373.4	1654.04	52421.7	27053.2	10.3478	10.1896	0.666143	0.94344	ATCGCTACACACG	ATCGCTACGCACG	1	1	1	3	0	1	0
363893	4	512437	4	514566	0	1	LYS14	429.865	1461.93	6832.26	24122.8	7.89996	8.83697	0	0	GTCATCGTTTCCT	-------------	0	0	13	6	0	0	0
363932	4	512398	4	514530	0	1	LYS14	445.695	970.722	10388	16024.1	8.34901	8.83697	0.860175	0.794185	ATCATTGCCTACG	ATCATTAATTACG	1	1	3	4	0	0	1
364277	4	521549	4	516928	0	1	ARO3	563.803	879.558	8721.69	14453.2	9.89418	8.37958	0	0	ATATTTAGCCGCT	TTATTTAGCCGCT	0	0	1	2	0	0	0
364315	4	521587	4	516966	0	1	ARO3	590.327	929.691	11186.1	13687.5	9.89418	8.37958	0.890021	0.912016	GTCACTATGTACG	GTCACCATTGACG	1	1	3	5	0	0	1
371326	4	551176	4	538703	0	1	BAP3	563.039	1856.42	9556.89	27040.4	6.45755	7.83518	0.653574	0.631579	ATAACTTGGTACG	ATAACTTAGTACG	1	1	1	6	1	0	0
380624	4	587939	4	575966	1	1	DOA4	1489.36	2478.01	31264.3	38996.6	8.83697	8.83697	0.838181	0.838181	ATCGTTCATTACG	ATCGTTCATTACG	1	1	0	1	0	0	1
380685	4	587882	4	575907	1	1	DOA4	3093.64	3111.47	50199.1	49432	7.75551	7.75551	0.838181	0.838181	ATCGTTCATTACG	ATCGTTCATTACG	1	1	0	1	0	0	1
381568	4	589605	4	577611	0	1	PAA1	480.41	1107.42	9179.74	15855	6.72492	6.72492	0.592302	0.592302	ATAGTTTTGAACG	ATAGTTTTGAACG	1	1	0	1	1	0	0
383404	4	593479	4	581450	1	1	TPS2	1106.26	1561.32	16990.3	23089.5	7.89421	8.33343	0	0	C-------CAGCG	CAAAAATCCAGCG	0	0	7	0	0	0	0
383441	4	593516	4	581486	1	0	TPS2	1036.32	566.289	18175.8	9575.87	5.92348	6.17361	0.750982	0.812253	CTCGTTCTCTACG	CTCGCTCTGTACG	1	1	2	2	1	1	0
386189	4	610283	4	598238	1	1	PDC2	1246.77	822.339	18676	13305.5	7.42202	7.42202	0.912016	0.912016	GTCACTCAGAACG	GTCACTCAGAACG	1	1	0	0	0	0	1
386236	4	610236	4	598191	1	1	PDC2	969.351	675.496	15648.5	12132.1	7.40892	7.40892	0.912016	0.912016	GTCACTCAGAACG	GTCACTCAGAACG	1	1	0	0	0	0	1
386406	4	611927	4	599880	1	1	RRP8	1670.91	917.94	25874.8	14350.1	7.73473	7.73473	0	0	CATTTGGAATACG	CATTTGGAATAC-	0	0	1	3	0	0	0
386446	4	611967	4	599919	1	1	RRP8	1992.64	1124.88	38425.5	19773.6	7.73473	7.73473	0.838181	0.860175	ATCGTCAATAACG	ATCGTCAACAACG	1	1	1	1	0	0	1
388072	4	618482	4	606461	1	0	RRP1	742.217	463.566	11265.2	7951.32	8.16642	7.98357	0	0	ATCTTTTAAGTGG	ATCTTTTAACTGT	0	0	2	1	0	0	0
388113	4	618441	4	606423	1	0	RRP1	906.668	530.826	13041.8	8553.23	7.98357	7.98357	0.956012	0.956012	GTCACGGAGCACG	GTCACGGAGCACG	1	1	0	1	0	0	1
391952	4	628940	4	616638	0	1	RLI1	513.003	1432.12	9936.47	23121.3	7.83518	7.51679	0.838181	0.816179	ATCATCAACAACG	ATCATTATCAACG	1	1	2	1	0	0	1
392130	4	628772	4	616466	0	1	RLI1	388.233	994.585	7224.36	15341.3	7.58985	5.66882	0	0	GTATTTGCTTATG	GTAATCGGTTATA	0	0	4	3	0	0	0
392421	4	636175	4	624019	1	0	GIS1	1202.81	293.818	16463	4138.51	9.06283	8.28099	0.965434	0.965434	ATCACCCGGCACG	ATCACCCGGCACG	1	1	0	2	0	0	1
396424	4	652503	4	634107	1	1	BMH2	3410.23	3232.08	61515.9	59770.4	7.91454	8.28099	0.82875	0.82875	GTCATTAACAACG	GTCATTAACAACG	1	1	0	3	0	0	1
396485	4	652564	4	634168	1	1	BMH2	1797.12	1647.41	31984.4	29329.1	10.6124	9.91254	0.894733	0	GTCTTCCGTGACG	TTGGAGCGTGACG	1	0	5	1	0	1	0
405328	4	693349	4	674386	0	1	DPB4	213.935	694.796	3698.78	10636.1	8.37958	10.3478	0	0	CTCATCGCAAAGT	CTCATCGCAA-GT	0	0	1	0	0	0	0
405370	4	693386	4	674428	0	1	DPB4	482.914	922.208	9502.66	15770.6	8.37958	10.3478	0.921446	0.899452	ATCCCTTTGGACG	ATCGCTTTGAACG	1	1	2	2	0	0	1
409053	4	716791	4	697856	1	1	FIN1	1156.46	1527.52	19819.6	27297.8	7.74011	6.79103	0	0	GAATTGGTGGACG	GAATTGGTGGACG	0	0	0	1	0	0	0
409113	4	716733	4	697798	1	1	FIN1	1186.6	1808.18	19056.5	25897	8.16642	8.16642	0.816179	0.816179	ATCATTATGTACG	ATCATTATGTACG	1	1	0	3	0	0	1
411234	4	730412	4	711577	0	1	HPR1	366.673	1336.1	7950.49	19887.6	8.28099	8.16642	0	0	GGCTTTATTGTCG	CGTTTCACTAAC-	0	0	7	3	0	0	0
411289	4	730461	4	711625	1	1	HPR1	1995.78	989.017	30547.3	16259	8.28099	8.28099	0.750982	0.728987	CTCATTTCGCACG	CTCATTTCACACG	1	1	1	2	1	0	0
414570	4	755498	4	736732	0	1	KGD2	442.258	682.617	7253.09	10652	5.4188	5.4188	0	0	GTAGTAAT-GACG	GTTGCAATAGAGG	0	0	4	2	0	0	0
414631	4	755437	4	736671	0	1	KGD2	170.096	760.22	3520.66	13378.8	9.21923	9.21923	0.860175	0.860175	ATCGTCTTTGACG	ATCGTCTTTGACG	1	1	0	3	0	0	1
421158	4	794446	4	778100	1	0	STB3	3004.09	133.304	55317.5	4094.4	8.16642	6.50472	0	0	ATACAATACTACA	GCACTGTGTTACA	0	0	6	5	0	0	0
421186	4	794418	4	778084	1	1	STB3	2961.61	2022.05	48473.4	32017.9	9.80863	9.80863	0.860175	0	ATCATTGCCAACG	ACCATTGCTAACG	1	0	2	5	0	1	0
421210	4	794394	4	778060	1	1	STB3	3733.32	841.512	64884.3	17331.6	11.2505	11.2505	0.860175	0.94344	ATCACTCCGCACG	ATCACTCCGCACG	1	1	0	1	0	0	1
421272	4	794332	4	778002	1	1	STB3	3207.46	1808.42	58110.4	32042.4	6.54772	6.63487	0	0	CTCAGCGCGCACG	CTCAACGCGCACG	0	0	1	0	0	0	0
425198	4	807962	4	788742	1	0	SUP35	1247.24	101.23	19117.1	1524.34	7.06681	6.99304	0	0	GTCACAGTGTTCG	GACGCAATGGCTA	0	0	7	2	0	0	0
425374	4	808128	4	788912	1	0	SUP35	966.295	582.369	16985.4	8064.08	11.3052	11.3052	0.794185	0.855456	ATCATATTATACG	ATCACATTATACG	1	1	1	6	0	0	1
425421	4	808164	4	788959	1	0	SUP35	1264.22	454.675	18532.4	8153.37	5.50845	6.29847	0.794185	0.855456	ATCATATTATACG	ATCACATTATACG	1	1	1	6	0	0	1
426248	4	814343	4	795136	1	1	RSM24	894.361	1221.91	14454	19817.6	9.78349	9.78349	0	0	ATTTCATTTGATG	ATTCCATTTGATG	0	0	1	1	0	0	0
426314	4	814279	4	795072	1	1	RSM24	1576.06	2441	20805.7	38651.8	11.6091	11.6091	0.94344	0.94344	ATCGCGTTGCACG	ATCGCGTTGCACG	1	1	0	0	0	0	1
426574	4	816631	4	797420	0	1	UBC1	610.274	1498.41	10457.5	23819.8	7.59425	9.07399	0	0	AACGCATATAACT	AACGCATATAACT	0	0	0	1	0	0	0
426618	4	816674	4	797464	0	1	UBC1	662.389	1166.57	13407.1	20100.6	7.59425	9.07399	0.868027	0.890021	GTCACATAATACG	GTCACATAGTACG	1	1	1	3	0	0	1
429853	4	836246	4	816865	1	1	SND1	822.681	801.016	14512	12201.3	11.2505	11.2505	0.877458	0.899452	ATCACTGTTTACG	ATCACTGTTCACG	1	1	1	1	0	0	1
432941	4	848079	4	828599	1	0	MSS116	1029.36	410.808	16798.1	6304.68	10.3477	9.89418	0	0	GTCTTTACTTATG	ACCATTACTTTTG	0	0	4	2	0	0	0
432983	4	848037	4	828558	1	1	MSS116	1079.57	877.107	19166.3	16113.2	10.3477	9.89418	0.899452	0.912016	ATCACTACAGACG	GTCACTACAGACG	1	1	1	3	0	0	1
434837	4	859212	4	839737	1	1	MSC2	5053.09	1802.83	78115.8	33949.8	9.91254	9.91254	0.94344	0.921446	ATCGCCTTGGACG	ATCGCCTTGAACG	1	1	1	3	0	0	1
434884	4	859258	4	839783	1	1	MSC2	3841.16	2075.04	62651.7	33417.4	9.91254	9.91254	0.94344	0.921446	ATCGCCTTGGACG	ATCGCCTTGAACG	1	1	1	3	0	0	1
435159	4	861585	4	842130	0	1	EBS1	137.969	1263.82	2315.86	22763.5	6.21536	6.62205	0	0.592302	---------TATG	ATATTGTTCTACG	0	1	10	5	0	0	0
435194	4	861603	4	842165	1	1	EBS1	1130.92	1172.09	19037.8	16776.8	7.22498	8.21919	0	0	ACGGT--------	AAGGTTTCTAGTA	0	0	9	10	0	0	0
435233	4	861642	4	842204	1	1	EBS1	1646.21	1780.57	29275.5	28374.5	9.06283	9.39808	0.899452	0.855456	ATCACGTCTTACG	ATCACATTTTACG	1	1	2	3	0	0	1
435615	4	867952	4	848529	1	1	UME6	846.277	1219.2	12432.8	17256.5	6.44852	6.44852	0	0	TTTTTTTTTAACC	TTTTTTTTTAACC	0	0	0	3	0	0	0
435645	4	867922	4	848499	1	1	UME6	979.112	1469.88	18427.7	27293.9	11.6091	9.76467	0	0	AATGGGCGGCACG	AATGGGCGGCACG	0	0	0	0	0	0	0
435688	4	867880	4	848457	0	1	UME6	526.414	1735.12	8570.31	22179.2	8.1456	8.1456	0.934017	0.872739	GTCACCTCAGACG	GTCATCTCAGACG	1	1	1	4	0	0	1
437688	4	884520	4	853425	1	0	GCD6	857.948	409.743	14147.8	8497.03	6.83074	10.7476	0	0	CACCTCGAGCACT	CACCTCGAGCACT	0	0	0	0	0	0	0
437729	4	884558	4	853466	1	0	GCD6	1399.26	584.355	24298.7	9858.18	6.83074	10.7476	0.706991	0.684996	CTCATGTAATACG	CTCATATAATACG	1	1	1	3	0	0	0
439558	4	893997	4	862877	1	1	ADR1	1172.93	2879.32	18675.1	45306.8	6.68629	8.21919	0.626866	0.626866	GTAGTTCTGTACG	GTAGTTCTGTACG	1	1	0	1	1	0	0
439611	4	894050	4	862930	0	1	ADR1	509.736	2771.31	8942.89	39977.4	10.7476	8.22494	0.626866	0.626866	GTAGTTCTGTACG	GTAGTTCTGTACG	1	1	0	1	0	0	0
442307	4	909573	4	878458	1	1	YDR222W	1665.22	1915.85	26665.7	29890.2	10.7219	10.7219	0	0	CTCGGCCAAAACG	CTCGGCCAAAACG	0	0	0	0	0	0	0
442348	4	909614	4	878499	1	1	YDR222W	1647.95	1237.17	27423	24457.7	10.7219	10.7219	0.614297	0.626866	ATAGTTCTGTACG	GTAGTTCTGTACG	1	1	1	1	1	1	0
442418	4	909682	4	878567	1	1	YDR222W	1087.12	1702.68	22889.1	25180.5	7.09382	7.09382	0	0	AAAATACAAGCCG	AAA-TACAAGCCG	0	0	1	0	0	0	0
445347	4	917328	4	886089	1	1	SIR4	2862.68	812.851	48594.4	12350.4	9.39808	9.39808	0	0	ATGTTTAAGGACG	AAGTTTA-GAATG	0	0	4	3	0	0	0
445388	4	917368	4	886130	1	1	SIR4	2893.07	1246.5	47001.5	20500.1	9.39808	9.39808	0.860175	0.816179	ATCGTTGAGAACG	ATCATTGAAAACG	1	1	2	1	0	0	1
447177	4	930809	4	899429	1	1	RTN1	1123.11	980.469	19043.7	15218.8	7.21214	9.07399	0.790259	0.899452	CTCACTTGACACG	ATCACTTGGTACG	1	1	3	4	0	1	0
447237	4	930751	4	899369	1	1	RTN1	2416.1	1375.26	39931.3	22231.9	9.06161	11.3052	0.877458	0.794185	ATCACTTGATACG	ATCATTATATACG	1	1	3	4	0	0	1
447275	4	930713	4	899331	1	1	RTN1	2528.6	1062.76	32471	16410.4	8.76001	9.83373	0.626866	0.626866	GTAATTTCGCACG	GTAATTTCGCACG	1	1	0	2	1	0	0
457374	4	977392	4	946180	1	1	SWM1	2077.18	1192.76	32469.5	18223.6	9.76467	8.83697	0	0	TGCTTTTC-TACA	CACTTTTTATACG	0	0	5	2	0	0	0
457415	4	977353	4	946139	0	1	SWM1	601.828	924.297	9242.21	14506	9.76467	8.83697	0.82875	0.816179	GTCTTTTTCTACG	ATCTTTTTCTACG	1	1	1	4	0	0	1
457454	4	977325	4	946106	1	0	SWM1	1171.62	333.164	19587.7	6144.02	6.56232	6.56232	0	0	-AAT--------T	TAATCCTGATAAT	0	0	9	5	0	0	0
460234	4	1002396	4	962127	1	1	HEL2	2306.39	1760.24	39419.4	32164.2	10.3477	6.74483	0.872739	0.872739	GTCATGTGTGACG	GTCATCTGTGACG	1	1	1	1	0	0	1
460282	4	1002351	4	962080	1	1	HEL2	2080.62	1831.83	30344.2	27926.5	12.1345	8.26826	0.872739	0.872739	GTCATGTGTGACG	GTCATCTGTGACG	1	1	1	1	0	0	1
462751	4	1011607	4	971363	1	1	BSC2	2513.03	1988.04	32910.2	39069.6	10.8755	10.8755	0.626866	0.592302	GTAGTTTCCTACG	ATAGTTTTGTACG	1	1	3	4	1	1	0
462834	4	1011689	4	971436	1	1	BSC2	5264.01	3009.49	89136.9	55307.3	7.51679	8.2127	0.794185	0.877458	ATCATTATTTACG	ATCACAGTTTACG	1	1	3	6	0	0	1
462883	4	1011734	4	971483	1	1	BSC2	1174.25	2670.7	31078.7	43329.6	6.22095	5.36846	0	0	CTAGGTTTCCGCG	CCGGGTTCCCACT	0	0	5	2	0	0	0
462928	4	1011778	4	971523	1	1	BSC2	3517.56	1133.28	54331.7	18414.5	9.80863	9.80863	0.872739	0.894733	GTCCTTTTGCACG	GTCCTGTTGCACG	1	1	1	4	0	0	1
463761	4	1014140	4	973903	1	0	PMP3	1556.96	150.918	25046	2057.94	7.3221	7.062	0	0	ATCTTCGCTACCC	GTCCTCGCTATCT	0	0	4	4	0	0	0
468034	4	1020486	4	979345	1	1	RRP45	1016.42	1356.49	18163.5	19007.6	9.89418	9.89418	0	0	ATGCTATAACTCG	ATGCTAAAACT-A	0	0	3	2	0	0	0
468076	4	1020528	4	979387	1	1	RRP45	695.279	972.023	11043.2	15691.7	9.89418	9.89418	0.912016	0.890021	GTCACTACCAACG	GTCACTATCAACG	1	1	1	2	0	0	1
470152	4	1030404	4	988920	1	1	GCN2	1075.41	1965.07	19369.1	31059.3	10.8161	10.8161	0	0	ATTAATCTTGACG	ATTAATCCTGACG	0	0	1	2	0	0	0
470195	4	1030361	4	988880	1	1	GCN2	2241.38	1701.96	31333.8	29668.9	10.8161	10.8161	0.877458	0.877458	ATCACTTTACACG	ATCACATTACACG	1	1	1	2	0	0	1
471363	4	1032226	4	990750	1	1	DPP1	1539.82	1467.26	28414.5	22841.9	8.66116	6.25292	0.51846	0.540456	AGCATTTTTTACG	AGCATTTTTCACG	1	1	1	2	1	0	0
471418	4	1032174	4	990696	1	1	DPP1	1029.32	1654.77	17693.7	25045.4	7.89421	7.89421	0.51846	0.540456	AGCATTTTTTACG	AGCATTTTTCACG	1	1	1	2	0	0	0
471789	4	1031840	4	990345	0	1	DPP1	536.981	2293.31	17676.1	37723.5	8.37958	7.73473	0	0	ACCACCTGAAAGG	-CCACCTGAAAGG	0	0	1	3	0	0	0
471832	4	1031803	4	990307	1	1	DPP1	2004.44	889.514	30878.5	14465	8.37958	9.63438	0.626866	0.850744	GTCATCGTTGACG	GTCATTGTTGACG	1	1	1	5	0	1	0
471859	4	1031779	4	990280	1	1	DPP1	1837.44	3520.49	30883.9	55530.9	7.16361	9.63438	0.653574	0.882169	---ATGCAGCACG	ATCATGCAGCACG	1	1	3	2	0	1	0
475556	4	1055058	4	1013691	1	1	HDA2	1301.99	941.568	20648.8	18577.7	10.8755	10.8755	0	0	ATATTCAGATACT	------AGATACT	0	0	6	3	0	0	0
475601	4	1055019	4	1013646	1	1	HDA2	1102.27	1623.57	20187.9	26452.4	10.8755	10.8755	0.706991	0.706991	CTCATTTTGTACG	CTCATTTTGTACG	1	1	0	7	1	0	0
477383	4	1063208	4	1021797	1	1	PRO1	1811.64	1253.41	30165.3	21317.8	11.2505	9.06283	0	0	AGCAGCGTTAAAG	AGCAGCGTTAAAA	0	0	1	0	0	0	0
477416	4	1063175	4	1021765	1	0	PRO1	2132.05	630.052	39752.2	12021.7	11.2505	9.06283	0.877458	0.855456	ATCACTTACTACG	ATCACTTATTACG	1	1	1	4	0	0	1
477601	4	1062997	4	1021586	1	0	PRO1	1797.93	254.069	26129.4	5710.51	5.36353	6.56232	0	0	ATAAATTTAGACC	ATAAATTTGGAC-	0	0	2	3	0	0	0
478275	4	1071830	4	1030425	1	1	RSC3	1849.45	1385.93	28787.6	21492.2	7.4401	7.4401	0.877458	0.877458	ATCACATAGAACG	ATCACATAGAACG	1	1	0	0	0	0	1
478335	4	1071770	4	1030365	1	0	RSC3	864.059	649.779	12301	10502.1	7.60481	7.60481	0.877458	0.877458	ATCACATAGAACG	ATCACATAGAACG	1	1	0	0	0	0	1
480727	4	1080912	4	1039505	1	0	GIC2	950.211	415.371	15753.1	7388.59	10.8755	11.3052	0	0	ACCTTTATCGACG	GCCTTTATCGACG	0	0	1	1	0	0	0
480775	4	1080864	4	1039457	1	1	GIC2	1570.97	1316.91	26946.8	23473.2	10.8755	11.3052	0	0	AACGCCCCAGTCG	AACGCCTCAGTCG	0	0	1	1	0	0	0
481565	4	1084973	4	1043521	1	1	SUM1	1164.44	730.09	19685.4	13916.2	7.81424	6.48353	0.728987	0.728987	CTCGTTTTTGACG	CTCGTTTTTGACG	1	1	0	1	1	0	0
481622	4	1084916	4	1043464	1	1	SUM1	1994.21	973.365	34021.5	16491.4	8.16642	7.0915	0.882169	0.882169	ATCATGTCCCACG	ATCATGTCCCACG	1	1	0	3	0	0	1
481807	4	1084735	4	1043283	1	1	SUM1	1848.56	1139.15	33186.2	19355.5	10.08	10.08	0.838181	0.838181	ATCTTGTTGAACG	ATCTTGTTGAACG	1	1	0	0	0	0	1
482478	4	1087408	4	1045950	1	1	SSF2	882.435	1223.15	13802.8	20297.5	7.91454	6.82211	0	0	AGACCTAAGCACT	AGAACAAGGTGCT	0	0	5	6	0	0	0
482531	4	1087444	4	1046003	1	1	SSF2	714.971	1661.95	10626.7	25518.5	8.23736	8.23736	0.860175	0.860175	ATCATCTTGGACG	ATCATCTTGGACG	1	1	0	4	0	0	1
490410	4	1125255	4	1077766	1	1	YSP2	1573.64	1851.11	29323	34762	10.3478	10.3478	0	0	ATATATGTATACA	ATATATGTGTGCA	0	0	2	0	0	0	0
490456	4	1125209	4	1077720	1	1	YSP2	1992.43	2427.45	33348.5	38325.9	10.3478	10.3478	0.921446	0.899452	ATCGCTACACACG	ATCGCTAAACACG	1	1	1	2	0	0	1
491060	4	1127731	4	1080218	1	1	PEX3	1813.17	841.897	31050.1	15428.7	8.16642	9.39237	0	0	ATATTCATACATT	GTATTCATATATA	0	0	3	2	0	0	0
491106	4	1127685	4	1080172	1	1	PEX3	2179.97	1036.57	39172.8	16449.1	8.16642	9.39237	0.838181	0.816179	ATCATTACACACG	ATCATTATACACG	1	1	1	2	0	0	1
491974	4	1135600	4	1088080	0	1	RQC1	614.815	1075.92	9403.44	15136.8	9.44754	11.3052	0.653574	0.609584	ATACCTCTATACG	ATATCTTTATACG	1	1	2	4	0	0	0
492042	4	1135537	4	1088012	0	1	RQC1	540.504	1005.2	8474.95	15104.4	8.04121	11.3052	0	0	GTAACATTATGCG	GTAATATTATATC	0	0	4	2	0	0	0
495253	4	1150665	4	1103193	1	1	FCF1	1480.23	781.566	21481.1	11783.8	8.16642	8.26826	0.816179	0.816179	ATCATTATGAACG	ATCATTATGTACG	1	1	1	1	0	0	1
495305	4	1150615	4	1103146	1	0	FCF1	1691.28	632.376	30656.5	10701.3	6.27374	6.99962	0.816179	0.816179	ATCATTATGAACG	ATCATTATGTACG	1	1	1	1	0	0	1
497949	4	1169002	4	1121543	1	1	SVF1	1311.62	971.15	19916.9	18276	6.5668	8.28099	0	0	ATGATATTGCTC-	ATGATATTGCCCT	0	0	2	2	0	0	0
497989	4	1168965	4	1121507	0	1	SVF1	558.88	846.418	9040.2	13636.2	6.5668	8.28099	0.790259	0.82875	CTCACTTTCCACG	GTCATTTTTCACG	1	1	3	3	0	1	0
498403	4	1172234	4	1124840	0	1	PAL1	243.855	667.652	4689.05	10348.9	10.0525	10.0525	0.904163	0.904163	ATCGTCGTGCACG	ATCGTCGTGCACG	1	1	0	2	0	0	1
500427	4	1178360	4	1130311	1	1	ATP22	1043.28	1731.75	18229	30218.8	6.98505	5.999	0	0	ATCCTGCTATAAT	ATCCTGCTATAAT	0	0	0	1	0	0	0
500489	4	1178298	4	1130253	1	1	ATP22	1346.51	2279.68	23769.7	36789.8	11.2505	11.2505	0.855456	0.855456	ATCACTATATACG	ATCACTATATACG	1	1	0	3	0	0	1
501295	4	1182887	4	1134826	0	1	TRR1	33.06	792.167	477.015	10529.2	6.0477	13.3884	0	0.60487	GTACTTTTACACA	GTACTTTTACACG	0	1	1	2	0	1	0
503115	4	1195354	4	1147288	1	1	EAF1	1045.91	829.057	17119	14828.9	6.4121	6.60764	0	0	AGGGCAGTGATCG	GAGGCTGTGGTAG	0	0	5	3	0	0	0
503136	4	1195333	4	1147267	0	1	EAF1	628.31	1215.96	13095.8	19125.5	10.1408	9.44754	0.872739	0.850744	GTCATCCTACACG	GTCATCGTATACG	1	1	2	2	0	0	1
503610	4	1196504	4	1148417	0	1	BCP1	88.5703	996.698	1635.73	14628.3	5.31153	7.55825	0	0	GTTATTCCTGCCG	G-------TGTCG	0	0	8	5	0	0	0
503670	4	1196447	4	1148386	0	1	BCP1	497.216	1462.74	10027.4	25982.9	11.3052	11.3052	0	0	AACTTCAGTTAAG	-------------	0	0	13	7	0	0	0
503711	4	1196411	4	1148347	1	1	BCP1	1156.51	751.563	17882	13015.2	11.3052	11.3052	0.868027	0.806756	GTCACTTTATACG	GTCATTTTATACG	1	1	1	7	0	0	1
505117	4	1206568	4	1159080	1	1	ESF1	693.327	1071.27	10747.2	17378.8	7.51679	7.91454	0.816179	0.82875	ATCATTATTGACG	GTCATTATTGACG	1	1	1	1	0	0	1
505583	4	1212244	4	1159080	0	1	KEI1	0	950.508	18.461	16128	6.82211	7.91454	0	0.82875	GTTTTTAT-----	GTCATTATTGACG	0	1	7	5	0	1	0
507289	4	1222604	4	1169231	1	1	VPS74	692.266	834.944	12239.5	12113	5.50845	8.21919	0	0	ATAATGTTTAATT	ATAATGTTTAACC	0	0	2	3	0	0	0
508682	4	1229762	4	1176447	1	1	LSM6	919.4	1271.69	14347.8	20544.6	5.84504	5.19828	0	0	GCTAAAAGA-AAG	GCTAAAGGTTAAG	0	0	3	4	0	0	0
508742	4	1229703	4	1176389	0	1	LSM6	563.124	1112.43	9794.94	18819.9	9.6884	9.39237	0.57502	0.57502	GGCATTGTACACG	GGCATTGTACACG	1	1	0	2	1	0	0
509980	4	1242820	4	1189536	0	1	ATO3	407.797	1041.65	7294.09	18811.9	9.80863	9.80863	0.860175	0.882169	ATCGTTTTGCACG	ATCGTGTTGCACG	1	1	1	2	0	0	1
510031	4	1242773	4	1189488	1	1	ATO3	1475.73	844.474	25421.3	18660.3	6.79103	6.5271	0.860175	0.882169	ATCGTTTTGCACG	ATCGTGTTGCACG	1	1	1	2	0	0	1
510065	4	1242741	4	1189454	1	1	ATO3	1331.61	749.131	19586.6	12715.7	10.8755	6.17361	0.60487	0.626866	GTACTTTTGTACG	GTACTTCTGTACG	1	1	1	0	1	0	0
510211	4	1242597	4	1189309	1	0	ATO3	847.805	343.741	11549.2	5090.24	7.062	8.37958	0.648861	0.648861	GTAATGGCTGACG	GTAATGGCTGACG	1	1	0	2	1	0	0
514308	4	1261441	4	1208671	1	1	RPT3	1998.96	1068.29	29018.5	24226.3	8.1643	8.1643	0.965434	0.965434	ATCGCGCGCTACG	ATCGCGCGCTACG	1	1	0	2	0	0	1
514362	4	1261494	4	1208725	1	1	RPT3	1211.64	1613.74	24970.9	27660.8	7.24026	7.24026	0.965434	0.965434	ATCGCGCGCTACG	ATCGCGCGCTACG	1	1	0	2	0	0	1
515099	4	1267239	4	1214478	1	1	NCB2	1470.26	1260.96	22631.4	23231	13.3884	13.3884	0.82875	0.82875	GTCATTTAACACG	GTCATTTAACACG	1	1	0	3	0	0	1
515305	4	1267037	4	1214274	1	1	NCB2	2579.11	2845.12	45809	50109.3	6.45326	6.45326	0	0	CCACTTTAAAACG	CCACCTTAAAACG	0	0	1	1	0	0	0
515353	4	1266989	4	1214227	1	1	NCB2	1457.57	1275.95	27297.9	23486.3	8.72652	9.39237	0	0	GTTTTTGGTCGCG	G-TTTTGGCCGCG	0	0	2	0	0	0	0
515391	4	1266951	4	1214189	1	1	NCB2	2134.6	2516.71	27747.2	33635.1	8.83697	9.39237	0.688138	0.666143	GTAACTCTGCACG	GTAACTCTACACG	1	1	1	1	1	0	0
515680	4	1269584	4	1216814	0	1	HPT1	10.5673	1277.87	466.193	19568.4	9.00721	9.7757	0	0.790259	CTTACTGTTAACG	CTCGCTGTTAACG	0	1	2	2	0	0	0
516711	4	1277493	4	1224817	1	1	RPB7	845.386	2274.65	15123	38099.9	11.3052	11.3052	0.899452	0.838181	ATCGCGTTATACG	ATCGTGTTATACG	1	1	1	0	0	0	1
516768	4	1277436	4	1224760	1	1	RPB7	1042.52	2014.85	18324.3	35756.1	11.2505	7.74011	0.855456	0.877458	ATCACTTAATACG	ATCACATAACACG	1	1	2	3	0	0	1
516980	4	1288179	4	1235546	1	1	TRS120	847.593	1279.98	13098.5	18478.8	6.5668	9.07399	0	0	CTATTCTTATTTG	CTATTCTTATTTT	0	0	1	2	0	0	0
517044	4	1288118	4	1235483	1	1	TRS120	911.931	1296.38	14265.6	20014.5	9.49276	9.49276	0.816179	0.816179	ATCATGATTTACG	ATCATGATTTACG	1	1	0	2	0	0	1
517412	4	1289239	4	1236598	0	1	ADE8	424.773	878.022	6316.76	11588.8	8.10111	8.10111	0	0.645719	AGCTCAGGTGACA	AGCTCAGGTGACG	0	1	1	4	0	1	0
517941	4	1293281	4	1240622	1	1	STE14	1590.53	879.172	23195.3	13480.6	8.37958	8.37958	0	0	ATACTATGTCAGA	ATACGATGTCAAA	0	0	2	1	0	0	0
517983	4	1293240	4	1240580	1	1	STE14	1938.36	890.05	31991.5	15433.5	8.37958	8.37958	0.899452	0.899452	ATCACTCAAGACG	ATCACTCAAGACG	1	1	0	2	0	0	1
523043	4	1319314	4	1267086	1	1	SIP1	1843.34	1078.39	26800	17081.4	8.92661	11.3052	0.592302	0.570306	ATACTTTCATACG	ATACTTTTATACG	1	1	1	1	1	0	0
524379	4	1318018	4	1265770	1	1	SIP1	1117.42	2128.57	19554.8	38218.5	9.06325	10.3477	0	0.562451	AGCATA---TAAA	AGCATACACTACG	0	1	5	2	0	0	0
524434	4	1317967	4	1265717	1	1	SIP1	915.92	2116.52	17725.7	38172	10.8755	9.06161	0.899452	0.855456	ATCGCTTTGTACG	ATCACTTTTTACG	1	1	2	3	0	0	1
525600	4	1325457	4	1273265	1	1	TIF35	1251.99	1678.18	17667.1	26514.8	7.87207	7.729	0	0	ATAATTTAATCCT	ATAGTATGATCCT	0	0	3	0	0	0	0
525641	4	1325416	4	1273224	1	1	TIF35	765.771	1067.2	12831.6	17248.9	7.729	7.729	0.899452	0.899452	ATCGCTTGTAACG	ATCGCTTACAACG	1	1	2	0	0	0	1
525939	4	1328657	4	1276464	1	1	CYM1	759.787	1106.75	11899.4	17271.6	9.05234	8.4751	0	0	GGATTTAAAAAGG	GGGTTTAAAAAGG	0	0	1	0	0	0	0
525981	4	1328615	4	1276424	1	1	CYM1	1575.04	2799.63	24702.3	42226	9.05234	7.96853	0.877458	0.912016	ATCACTGTAAACG	GTCACTGTAGACG	1	1	2	2	0	0	1
527186	4	1331027	4	1278845	1	1	GPI17	1654.49	811.593	28466.2	19890.2	6.83074	6.83074	0	0	AGTTTCTTCAACT	AGTGTCCAAAATT	0	0	5	1	0	0	0
527230	4	1331071	4	1278889	1	1	GPI17	1766.02	1510.25	28930.7	24992.1	6.83074	6.83074	0.794185	0.794185	ATCATTTAATACG	ATCATTTAATACG	1	1	0	0	0	0	1
533744	4	1362697	4	1316819	0	1	YHP1	44.1366	852.005	853.025	11566.4	5.91377	6.11053	0	0	CTACCATAAAACC	GTACC--ACAACC	0	0	4	4	0	0	0
533788	4	1362654	4	1316775	0	1	YHP1	341.889	1744.46	5663.15	31011.2	7.32858	6.11053	0	0.609584	ATAACTTTAAAGG	ATAACTTTAAACG	0	1	1	1	0	1	0
535109	4	1367352	4	1321480	0	1	GUK1	321.773	1063.98	6404.31	18499.2	7.51679	7.51679	0	0	ATCTTGGGTGCCC	ATTTTGGGTGCCC	0	0	1	1	0	0	0
535152	4	1367309	4	1321437	1	1	GUK1	682.547	1089.74	11520.9	17448.6	9.43675	8.11754	0.816179	0.838181	ATCATTATTCACG	ATCATTATCCACG	1	1	1	6	0	0	1
536853	4	1386611	4	1340710	1	1	STP1	1379.1	1392.26	20986.9	28058.1	5.43987	5.92682	0	0	GTCCATATATACG	GTGTATATAAATG	0	0	4	6	0	0	0
536880	4	1386634	4	1340737	1	1	STP1	1000.29	2898.39	17176.6	44294.1	10.3477	9.70093	0	0	ATGTCTATGTACA	ATGTATAT--ACA	0	0	3	2	0	0	0
536923	4	1386668	4	1340775	1	1	STP1	1476.16	1791.74	27079.9	25319.6	10.3477	9.70093	0.877458	0.912016	ATCACTATTGACG	GTCGCTATCAACG	1	1	4	9	0	0	1
537401	4	1388619	4	1342734	1	1	SPP41	2126.71	976.628	30649.7	18861.3	9.06161	8.16642	0.877458	0.816179	ATCACTTTTGACG	ATCATTTTTGACG	1	1	1	0	0	0	1
537458	4	1388676	4	1342791	1	1	SPP41	1372.05	1136.1	21469.3	15812.9	7.01557	7.01557	0	0	ATCACTTTTGACG	ATCATTTTTGACG	0	0	1	0	0	0	0
539366	4	1402814	4	1356886	0	1	TRS31	548.652	925.026	8989.36	14013.9	9.80863	11.3052	0.838181	0.850744	ATCATTTTGCACG	GTCATTTTGCACG	1	1	1	2	0	0	1
539437	4	1402885	4	1356947	0	1	TRS31	123.625	780.205	3550.11	13784.4	5.65591	7.11491	0	0	ATAATTTCAAAAT	ATAATTTCAAAAT	0	0	0	6	0	0	0
542896	4	1411271	4	1365098	0	1	YDR476C	324.065	937.005	5695.03	14925.8	6.21476	6.21476	0.560879	0.560879	GTAATTATAAACG	GTAATTATAAACG	1	1	0	1	1	0	0
542956	4	1411211	4	1365038	0	1	YDR476C	353.687	774.36	5469.29	11096.5	5.52726	5.60701	0	0	GTAATTATAAACG	GTAATTATAAACG	0	0	0	1	0	0	0
545682	4	1429229	4	1383097	1	1	RIB3	2321.33	2571.59	36048	41650.2	10.1408	10.1408	0.934017	0.912016	GTCCCTCTACACG	GTCTCTCTACACG	1	1	1	1	0	0	1
547367	4	1436769	4	1390618	1	1	RSM28	1925.38	1710.85	23107.7	23049.9	7.03474	5.91415	0.899452	0.877458	ATCCCTTTTGACG	ATCCCTTTTAACG	1	1	1	6	0	0	1
547420	4	1436811	4	1390671	1	1	RSM28	2587.42	764.06	47600.8	17628.4	9.00721	7.29438	0.899452	0.877458	ATCCCTTTTGACG	ATCCCTTTTAACG	1	1	1	6	0	0	1
559855	4	1489208	4	1449223	1	1	AGE1	1585.44	1616.38	24386.9	29188.8	8.28099	8.37958	0	0	CGCCGAGAATACG	CGTCGGGAAAATG	0	0	4	1	0	0	0
559894	4	1489169	4	1449185	1	1	AGE1	1314.51	1942.68	20947.1	33303.1	9.96482	9.96482	0.82875	0.82875	GTCATTTTGAACG	GTCATTTTGAACG	1	1	0	1	0	0	1
559936	4	1489130	4	1449143	1	1	AGE1	1256.58	1252.24	17050.7	21872.6	10.3478	10.3478	0.614297	0.60487	ATAGTACTTGACG	GTAGTATTTGACG	1	1	2	1	0	1	0
560133	4	1490856	4	1450866	0	1	RBA50	423.924	1055.92	6643.75	17154.3	9.06161	9.06283	0.855456	0.877458	ATCACTTATTACG	ATCACTTTCTACG	1	1	2	2	0	0	1
560181	4	1490903	4	1450913	0	1	RBA50	347.152	1699.72	5775.06	23216.5	9.06161	9.06283	0.855456	0.877458	ATCACTTATTACG	ATCACTTTCTACG	1	1	2	2	0	0	1
567731	4	1511912	4	1471398	1	0	FDC1	1013.95	614.719	15937.4	9667.89	8.36088	7.40892	0	0	ATTTTCACGAAAG	ATTTTTACGAATG	0	0	2	1	0	0	0
567779	4	1511959	4	1471446	1	1	FDC1	1643.07	889.238	19858	10778.8	10.9008	10.9008	0	0	GTCAAAGTGACCG	GTCAGAGTGACCG	0	0	1	1	0	0	0
568273	4	1521017	4	1475973	1	0	YDR541C	811.053	39.1532	14601.6	637.54	7.24026	8.16642	0	0	ATGCGATCGTA--	ATGCAACCACACA	0	0	6	9	0	0	0
571414	5	144098	5	141848	1	1	YEA6	2041.57	853.925	36128.5	14675.1	7.12767	7.12767	0	0	ATGATGTCAAAAG	ATAATGTCAAAAA	0	0	2	2	0	0	0
571454	5	144137	5	141888	1	1	YEA6	2464.1	1077.3	39275.8	17989.4	7.29213	7.12767	0	0	ATGTTGACAGAGG	ATGTTGACAGAGA	0	0	1	3	0	0	0
571766	5	141040	5	138826	0	1	MIT1	460.931	1047.62	8377.81	18495	8.1456	11.2505	0.838181	0.899452	ATCATTGCATACG	ATCACTGCATACG	1	1	1	0	0	0	1
576007	5	123465	5	120280	1	1	GTT3	3331.08	2976.37	49105.1	47559.8	9.44754	11.3052	0.816179	0.816179	-TCATCATATACG	ATCATTGTATACG	1	1	3	0	0	0	1
576106	5	123562	5	120379	1	1	GTT3	1951.56	1482.06	34549.8	27136.9	10.6124	10.6124	0.614297	0	ATATTTTCGCACG	ATTTCTTCGCAGC	1	0	4	0	0	0	0
580783	5	100523	5	97075	1	1	VMA3	864.738	1268.44	16397.8	19763.5	11.3052	10.8755	0.877458	0.666143	ATCCCTTTATACG	GTACCTTTGTACG	1	1	3	1	0	1	0
582105	5	90083	5	86154	1	1	SPF1	1304.62	770.116	20761.5	12308	8.16843	7.42202	0	0	ATATTCATTAACA	ATATTCACTAACA	0	0	1	3	0	0	0
582147	5	90125	5	86196	1	1	SPF1	695.873	845.949	11095.4	13172.9	7.1723	7.1723	0.934017	0.934017	GTCACGCCATACG	GTCACGCCATACG	1	1	0	1	0	0	1
583925	5	85386	5	81423	1	1	HYP2	1142.84	1267.38	16822.3	18453.1	10.08	10.08	0	0	G-GTCCCTTGTCG	GAGTCC-TTGTCG	0	0	2	0	0	0	0
584058	5	85519	5	81555	1	1	HYP2	1531.84	1513.11	23371.5	23149.2	10.0525	10.0525	0.894733	0.894733	ATCGTGGAACACG	ATCGTGGAACACG	1	1	0	0	0	0	1
585434	5	82928	5	78964	1	1	RAD23	2053.37	2031.05	31646.7	32819.8	10.3477	13.3884	0.877458	0.877458	ATCACTATACACG	ATCACTATACACG	1	1	0	4	0	0	1
585510	5	82861	5	78889	1	1	RAD23	1049.56	675.177	17563.3	12153.5	9.70093	9.70093	0	0	AATTTCAATTTCG	AATTTCAATTTCG	0	0	0	0	0	0	0
588484	5	69336	5	65413	1	0	GLY1	1007.76	541.722	13996.1	7642.31	6.00447	6.00447	0	0	ATTCTTTTTTTCT	ATTTTTCTTTTCT	0	0	2	3	0	0	0
588549	5	69271	5	65348	1	0	GLY1	1376.89	343.632	21294.1	5635.05	7.3978	9.76467	0.628437	0.912016	GTCACGCGAAACG	GTCACATGGAACG	1	1	3	3	0	1	0
597139	5	39788	5	37947	1	1	CIN8	1040.44	722.325	15633.1	12239.9	11.2505	10.6124	0	0	ATTATATCTT--A	ATTATGTATTCGA	0	0	4	1	0	0	0
597181	5	39746	5	37909	1	1	CIN8	1660.26	1159.87	21454.6	17619.8	10.6124	10.6124	0.934017	0.890021	GTCACCACACACG	GTCACTAAAGACG	1	1	3	3	0	0	1
605106	5	162528	5	160286	1	0	NUG1	1381.31	597.936	22095.3	9186.45	8.5041	8.44296	0	0	CTAGATATATACA	CTAGATATACATA	0	0	2	2	0	0	0
605150	5	162568	5	160330	1	0	NUG1	688.828	549.464	9724.66	8966.82	9.6884	8.44296	0.890021	0.890021	GTCACTCTAAACG	GTCACTCTAAACG	1	1	0	2	0	0	1
611488	5	191997	5	188666	0	1	AFG3	472.389	2574.24	9072.41	47663.2	7.51298	7.51298	0	0	-TCTCTGTCGCCG	GTTTTTTTCGCC-	0	0	5	7	0	0	0
611516	5	191969	5	188638	1	1	AFG3	1116.49	6247.01	18816.1	102937	11.3052	7.51298	0.987429	0.94344	ATCGCGGGCCACG	ATCGCGTACCACG	1	1	2	3	0	0	1
612973	5	200931	5	197549	1	1	PRO3	2729.34	2283.93	42772.3	39476.3	10.8755	11.3052	0	0	ATGGCAATGTATG	ATGGTGATGTATG	0	0	2	3	0	0	0
613017	5	200975	5	197593	1	1	PRO3	2102.98	980.192	29462.3	16101	10.8755	11.3052	0.850744	0.82875	GTCCTTTTGTACG	GTCCTTTTATACG	1	1	1	0	0	0	1
613042	5	201000	5	197618	0	1	PRO3	441.366	1091.53	11004.1	15751.6	5.13175	6.18557	0	0	ATCTTCGAAAACA	TTCGGCCAAAACA	0	0	4	0	0	0	0
614175	5	208693	5	205484	1	1	CHO1	2664.37	1668.67	44421.9	25545.3	9.06161	9.06161	0.877458	0.877458	ATCACTTTGAACG	ATCACTTTCAACG	1	1	1	3	0	0	1
614256	5	208612	5	205408	1	1	CHO1	845.301	1052.33	14028.3	15455.8	7.45247	6.51231	0	0	AAGCTCAAAGGCG	AAGCTCAAAGTCG	0	0	1	0	0	0	0
616828	5	222387	5	219163	1	1	EDC2	2451.79	836.69	45849.3	13627.8	6.7805	6.7805	0	0	GTAGTCAAGTAAT	GTAGTCAGGTAAT	0	0	1	2	0	0	0
616870	5	222429	5	219205	1	1	EDC2	1907.34	1320.26	27896.2	17452.2	7.67777	6.7805	0.965434	0.965434	ATCGCGCGGTACG	ATCGCGCGGTACG	1	1	0	0	0	0	1
617429	5	225550	5	222305	0	1	ARB1	292.617	1123.58	5274.5	18952	9.06283	8.71997	0.899452	0.899452	ATCACCTTTGACG	ATCACCTTTGACG	1	1	0	4	0	0	1
629831	5	266135	5	262595	0	1	HIS1	161.99	1109.29	2723.36	17904.1	5.24934	6.82211	0	0.553024	CGCATGCTAAACA	GGCATGTTAAACG	0	1	3	4	0	0	0
634349	5	281179	5	277685	1	0	GPP2	994.05	175.57	15470.4	3210.95	8.37356	8.23736	0.834247	0	CTCGCCCTGAACG	CTTACCCTGGACG	1	0	3	1	0	0	0
634412	5	281118	5	277623	1	1	GPP2	1749.38	746.549	29533.4	17529.5	9.21923	7.18183	0.838181	0.912016	GTCGTTAAAGACG	GTCGCTAAAGACG	1	1	1	4	0	0	1
634514	5	281019	5	277522	1	1	GPP2	678.898	847.183	10746.9	12655.7	10.8161	6.31384	0	0	GGCACAGATGATG	GGCACAGAGGATA	0	0	2	1	0	0	0
635669	5	284506	5	280960	1	0	VHR2	1265.96	145.651	20403	2598.68	7.35475	7.22164	0	0	AGCGCCCAGAAAA	AACACCTAGAAAA	0	0	3	3	0	0	0
635711	5	284465	5	280919	1	0	VHR2	856.42	77.56	13380.3	1142.52	7.35475	7.22164	0.666143	0	TACCTTCT-AACG	TACTTTTTTAACG	1	0	3	2	0	0	0
639874	5	295001	5	290904	1	0	ARG5,6	1478.02	320.986	24359	5516.04	8.26826	5.50713	0	0	GTATCTGGCTAAT	GTA----GCTGCT	0	0	6	7	0	0	0
639952	5	295076	5	290981	1	1	ARG5,6	2339.96	930.715	37146.9	15005.7	8.11754	8.76001	0	0	TGCAGCGCTGACG	TGCAACGATGACG	0	0	2	3	0	0	0
639987	5	295109	5	291014	0	1	ARG5,6	99.1376	1030.77	2065.51	19958.1	8.11754	9.70093	0.838181	0.838181	ATCATAATGCACG	ATCATAATGCAC-	1	1	1	2	0	0	1
641515	5	302631	5	298529	1	1	TDA2	1840.79	1137.14	29106.4	17668.9	10.3478	10.3478	0	0	TCTCCGAGACACG	TCTCCGAGGCACG	0	0	1	0	0	0	0
641555	5	302592	5	298489	1	1	TDA2	2472.63	877.595	41956.2	14269.2	10.3478	10.3478	0.899452	0.877458	ATCGCTTGTTACG	ATCGCTTATTACG	1	1	1	3	0	0	1
641728	5	302424	5	298322	1	0	TDA2	1079.73	261.106	16570.8	4414.04	6.90458	6.82854	0	0	TTTACAAAAAAGG	TTTACAAAAAAAA	0	0	2	2	0	0	0
651067	5	337824	5	333748	1	0	PTC2	1107.11	635.446	19075	12339.9	6.68546	6.68546	0	0	ATAGCCCTTTAGT	ATATCCCTTTAGT	0	0	1	2	0	0	0
651094	5	337797	5	333721	1	1	PTC2	768.699	797.049	14111.5	14382.2	8.5041	8.5041	0	0	ATCTAACAATACT	ATATAACAATATT	0	0	2	2	0	0	0
651133	5	337758	5	333682	1	1	PTC2	1924.78	1273.75	33915.4	21881.8	8.5041	8.5041	0.899452	0.899452	ATCACTGTGTACG	ATCACTGTGTACG	1	1	0	1	0	0	1
652600	5	349746	5	345658	1	0	PUP3	1027.87	93.916	13722	1435.1	8.1719	8.28099	0	0	ACCCTATGCTACG	ACCCTATGCTACG	0	0	0	0	0	0	0
652762	5	349589	5	345520	1	0	PUP3	1408.34	342.994	21448	7471.53	10.1896	11.2505	0.877458	0.855456	ATCGCTATTAACG	ATCACTATTAACG	1	1	1	2	0	0	1
660711	5	374880	5	370991	0	1	GLE2	335.481	1865.14	11440.4	31471.8	7.46334	8.5041	0.816179	0.816179	ATCATGATTTACG	ATCATGATTTACG	1	1	0	0	0	0	1
660768	5	374823	5	370940	0	1	GLE2	374.482	1359.33	7716.44	22241.8	8.1719	8.1719	0.816179	0.816179	ATCATGATTTACG	ATCATGATTTACG	1	1	0	0	0	0	1
661177	5	382407	5	378504	1	1	KAP123	1727.4	1699.13	29723.3	26872.3	6.82211	6.82211	0	0	GAACTA----CTA	--ACAATCCGTTA	0	0	8	3	0	0	0
661208	5	382376	5	378478	1	0	KAP123	1287.64	468.749	20276.4	7492.48	10.8755	11.3052	0.806756	0.860175	GTCTTTTATTACG	ATCTTTCGCTACG	1	1	4	3	0	0	1
661244	5	382342	5	378442	0	1	KAP123	439.414	992.9	7331.01	14880.1	10.8755	11.3052	0.816179	0.794185	ATCATATTGTACG	ATCATATTATACG	1	1	1	3	0	0	1
661606	5	387094	5	383146	1	1	SWI4	922.37	912.486	13749.4	14063.6	7.84015	8.21919	0	0	TTCCTTCTTTACC	AACCTACCGTACT	0	0	6	4	0	0	0
661649	5	387051	5	383105	1	1	SWI4	1405.07	3197.71	21784.9	50175.2	7.84015	6.79103	0.816179	0.816179	ATCATGTTTTACG	ATCATGTTTTACG	1	1	0	5	0	0	1
661740	5	386965	5	383020	0	1	SWI4	149.852	2106.52	2927.66	35655.8	7.46334	6.70248	0.816179	0.850744	ATCATCAATTACG	GTCATCAACTACG	1	1	2	1	0	0	1
661784	5	386927	5	382978	1	1	SWI4	914.732	1652.68	16662.7	27758.8	7.00157	6.31384	0	0	CGCCCA-----CA	C--CCATCTACCA	0	0	7	3	0	0	0
665116	5	400985	5	397051	1	1	AVT6	1030.63	1155.53	15573.3	17159.8	8.08055	8.08055	0.94344	0.921446	ATCACCACGCACG	ATCACCACACACG	1	1	1	1	0	0	1
665172	5	400929	5	396995	1	1	AVT6	1926.82	1991.84	30007.5	30050.9	7.73704	6.8447	0.94344	0.921446	ATCACCACGCACG	ATCACCACACACG	1	1	1	1	0	0	1
665839	5	404564	5	400616	1	1	GLO3	1076.85	834.114	20273.9	16079.2	7.52545	5.75641	0	0	AAAATTTTAAACA	AAAATTTTAAACA	0	0	0	0	0	0	0
665895	5	404508	5	400560	1	0	GLO3	769.123	197.855	10442.4	3321.91	9.78349	8.09647	0.850744	0.912016	GTCATTTTCGACG	GTCACACTTGACG	1	1	4	1	0	0	1
665925	5	404478	5	400538	1	1	GLO3	707.968	902.162	12062.7	14699.6	8.1643	5.94118	0	0	TTTTTTCGAAACT	------CGAAACT	0	0	6	3	0	0	0
666202	5	409573	5	405607	0	1	DSE1	628.013	1002.19	10027.8	15534.6	11.3052	8.28099	0.82875	0.82875	GTCATTATGTACG	GTCATTATGTACG	1	1	0	2	0	0	1
666877	5	414389	5	410342	0	1	NSA2	631.366	1820.46	10089.2	30689.9	7.32858	7.32858	0	0	ATACCATTCTAAA	CTAACATTCTAAA	0	0	2	1	0	0	0
666926	5	414340	5	410293	1	1	NSA2	1124.42	1938.67	18780.3	31703.6	9.78349	7.32858	0.916735	0.916735	GTCGTCGGCAACG	GTCGTGGGCAACG	1	1	1	1	0	0	1
667710	5	416611	5	412551	1	0	SAK1	953.393	617.278	14358.3	12964.4	8.08055	7.67454	0	0	GCTTTTGGTTACG	GCTTCTGGTTACG	0	0	1	1	0	0	0
667754	5	416654	5	412595	1	1	SAK1	904.334	722.583	14314.7	12165	7.67454	7.67454	0.912016	0.890021	GTCGCTTGATACG	GTCGCTTAATACG	1	1	1	0	0	0	1
675618	5	442390	5	444769	0	1	YER137C	116.495	758.919	2104.64	12740.7	9.06325	9.80863	0.49725	0.49725	CGCCTCCATCACG	CGCCTCCATCACG	1	1	0	0	1	0	0
676570	5	453230	5	449236	1	1	COX15	2331.47	1847.46	34741.8	28155.7	9.70093	10.3478	0	0	ATAGCGAGCGACA	ATAGCGAGCGACA	0	0	0	0	0	0	0
676621	5	453281	5	449287	1	1	COX15	1754.6	1455.02	32549.7	25760.9	9.44754	10.3478	0.94344	0.921446	ATCGCGGCTTACG	ATCGCTGGTTACG	1	1	2	2	0	0	1
679530	5	464997	5	460997	1	1	SCC4	2098.87	1634.43	40186.1	31664.7	7.05378	7.05378	0	0	AGATCTTCAAATT	AGATCTTC--ATT	0	0	2	0	0	0	0
679572	5	464956	5	460956	1	1	SCC4	1924.1	1302.88	28346.5	20233.7	6.74326	6.41913	0.609584	0.609584	ATAACTATTTACG	ATAACTATTTACG	1	1	0	4	1	0	0
682586	5	491425	5	487156	0	1	YER158C	282.262	1272.02	4578.92	19566.6	6.7025	7.08608	0	0.688138	GTAATCACATATG	GTAACCACGTACG	0	1	3	1	0	0	0
682732	5	491288	5	487015	1	1	YER158C	1269.1	2763.54	22600.4	42291.5	7.42644	8.2127	0.921446	0.94344	ATCACCCCATACG	ATCACCCCGTACG	1	1	1	0	0	0	1
682811	5	491210	5	486937	1	1	YER158C	695.237	902.885	12350	17002.9	9.44754	12.1345	0.584446	0.584446	AGCCTGCTATACG	AGCCTCCTATACG	1	1	1	2	1	0	0
685013	5	492284	5	487987	1	1	BUR6	881.247	2368.22	21250.3	40692.2	8.76001	9.39237	0.507463	0	ATGCCGGGTTACG	ATACCGGGT----	1	0	5	10	0	0	0
685062	5	492242	5	487938	1	1	BUR6	1773.02	3447.24	31246.1	55466.4	8.76001	9.39237	0.82875	0.82875	GTCATAATTCACG	GTCATAATACACG	1	1	1	2	0	0	1
685372	5	500536	5	490977	1	1	SPT2	1781.21	1045.27	28941.7	18261.6	6.68546	6.8447	0	0	AAATTCCTGAACA	AAGTCCCTTACCT	0	0	5	3	0	0	0
685424	5	500484	5	490931	1	1	SPT2	2523	1726.93	40818.2	29430.3	5.84089	6.8447	0.816179	0.816179	ATCATGTTAAACG	-TCATTCTAAACG	1	1	3	5	0	0	1
687538	5	509967	5	500451	1	1	PAB1	1491.65	1035	23799.7	20944	9.00721	9.00721	0	0	ATGACCATATA--	AT----ATGTATA	0	0	7	4	0	0	0
687581	5	510010	5	500489	1	0	PAB1	1348.97	521.911	19782.5	8433.58	9.00721	9.00721	0.816179	0.816179	ATCATGTTTAACG	ATCATGTTTAACG	1	1	0	3	0	0	1
687613	5	510042	5	500519	0	1	PAB1	439.159	993.628	7714.23	16474	4.96204	4.96204	0	0	CTGTTAATCGAAG	CGGTTAACCGAAG	0	0	2	1	0	0	0
688111	5	512305	5	502784	1	0	DNF1	1006.87	268.932	15813.9	5649.76	6.82211	6.82211	0	0	GTATCATTTTACT	GTATCATTTTACT	0	0	0	0	0	0	0
688163	5	512357	5	502836	1	0	DNF1	1049.69	436.356	16813	7770.05	6.70699	9.00721	0.684996	0.684996	CTCATTATTAACG	CTCATTATTAACG	1	1	0	3	1	0	0
690224	5	526829	5	517284	1	1	RAD3	2526.31	1807.23	39660.6	27452.1	9.87881	10.08	0	0	AGAATATTCAAAG	AGGTTATTTACGG	0	0	5	2	0	0	0
690260	5	526865	5	517320	1	1	RAD3	3093.47	1864.74	50717	31494.3	9.87881	10.08	0.904163	0.904163	ATCATGGCCGACG	ATCATGGGCGACG	1	1	1	1	0	0	1
690576	5	536191	5	526651	1	1	BRR2	2399	870.835	37085.8	13542.7	7.90111	10.3478	0.912016	0.877458	GTCGCTCTTTACG	ATCGCTATATACG	1	1	3	1	0	0	1
690632	5	536135	5	526598	1	1	BRR2	2179.76	1324.72	32759.6	18377.1	6.0477	5.42424	0.912016	0.877458	GTCGCTCTTTACG	ATCGCTATATACG	1	1	3	1	0	0	1
699709	6	119246	6	139958	1	1	SMC1	760.593	1583.88	13918.3	25405.9	10.3478	9.43675	0	0	A-GCCTTGGAACG	ATGC--TGAAACA	0	0	5	3	0	0	0
699751	6	119287	6	140000	0	1	SMC1	429.059	1187.98	7299.82	17361.6	7.08608	7.89421	0.838181	0.965434	ATCATGACAAACG	ATCGCCCCGAACG	1	1	5	3	0	0	1
699776	6	119312	6	140025	1	0	SMC1	692.351	618.771	11613.2	11141.1	6.74326	6.74326	0	0	ATAAACACGTA-C	ATAAACGCGTATT	0	0	3	4	0	0	0
700745	6	110095	6	130976	1	1	IES1	1621.09	1712.65	25511.2	26123.2	9.39237	8.83697	0.860175	0.838181	ATCGTGTACAACG	ATCGTGAAAAACG	1	1	2	1	0	0	1
700805	6	110035	6	130916	1	1	IES1	1218.09	1229.91	18351.1	19018.2	7.00157	6.21536	0	0	AACCTGTTTTTCG	AACCTATTTTTCG	0	0	1	2	0	0	0
703660	6	103365	6	124246	1	1	LPD1	4302.47	2891.1	68967	44424.2	7.51679	9.89418	0.794185	0.912016	ATCATTAAAAACG	GTCACTAGCAACG	1	1	4	3	0	0	1
703698	6	103327	6	124208	1	1	LPD1	772.094	1724.03	14539	31138	7.1384	7.4401	0.860175	0.899452	ATCATCTCGAACG	ATCACATCGAACG	1	1	2	1	0	0	1
703745	6	103281	6	124161	1	1	LPD1	2581.87	1305.98	42611.5	21817.1	7.29213	6.29847	0	0	CTCCGCGGAGACT	CTCCGCGGAGACT	0	0	0	1	0	0	0
704673	6	95285	6	115639	0	1	FRS2	604.799	867.614	9760.52	14028.7	5.53265	5.04781	0	0	ATCGTTTTATCAG	ATCGTTTGTT---	0	0	5	2	0	0	0
704749	6	95213	6	115576	1	1	FRS2	807.658	1029.88	14521.5	16910.1	6.25295	5.92348	0	0	AAAACAGAAAAAT	AAAA---AAAAAT	0	0	3	4	0	0	0
704795	6	95167	6	115531	1	1	FRS2	974.104	1159.54	16608.8	19546.9	7.08608	7.08608	0.540456	0.579733	AGCATTTTTCACG	AGCACTTTTTACG	1	1	2	0	1	1	0
708286	6	74970	6	95362	1	1	RIM15	966.04	841.578	16398.5	14670.8	8.04121	8.04121	0	0	ATAGTGAATGTAG	ATAGTGAAAG-AG	0	0	2	2	0	0	0
708332	6	74928	6	95316	1	1	RIM15	1609.2	1125.26	20840.2	16233.3	7.52545	10.7219	0.921446	0.877458	ATCACTCGGTACG	ATCACAATGTACG	1	1	3	2	0	0	1
708587	6	74679	6	95069	0	1	RIM15	593.044	1314.93	9768.5	20976.7	8.16843	6.99334	0	0	AGC--TTTTGGCA	AGCTTTTTTGGCA	0	0	2	2	0	0	0
708640	6	74626	6	95016	0	1	RIM15	424.009	731.156	6696.21	11684.9	6.46119	6.56232	0	0	ATGCTGTGATACG	ATGCTGTAATACG	0	0	1	1	0	0	0
709385	6	58347	6	78742	1	1	RPO41	1662.25	1461.61	26162.3	21150.7	8.16642	10.3477	0.653574	0.877458	ATCATTTTTCACG	ATCACTATTCACG	1	1	2	1	0	1	0
709453	6	58415	6	78810	1	1	RPO41	1400.53	1566.38	24769.7	23681	11.2505	11.2505	0.877458	0.899452	ATCACTGAATACG	ATCACTGCAAACG	1	1	2	0	0	0	1
709796	6	56197	6	76618	1	1	YPT1	767.638	852.558	11360.7	12332.5	10.08	9.89418	0.912016	0.890021	GTCACTGTACACG	GTCACTATACACG	1	1	1	4	0	0	1
709860	6	56133	6	76554	1	1	YPT1	727.363	876.078	12719.3	14124.2	8.83697	6.65782	0.890021	0.890021	GTCACGATATACG	GTCACAAACTACG	1	1	3	1	0	0	1
712188	6	40334	6	60716	1	1	EMP47	2802.21	3949.43	45982.8	63704.7	10.3477	9.89418	0	0	ATATTATGAAACA	ATATTATGAAACA	0	0	0	3	0	0	0
712229	6	40293	6	60675	1	1	EMP47	2447.33	4378.62	41942.5	70327.3	10.3477	9.89418	0.877458	0.890021	ATCACTATACACG	GTCACTACATACG	1	1	3	2	0	0	1
717794	6	153293	6	167197	1	1	YPI1	1266.64	975.647	20681.5	18233.1	6.70963	6.70963	0	0	ATATTAATACTGG	AGGATACTACTGG	0	0	4	2	0	0	0
717853	6	153234	6	167139	1	1	YPI1	1651.98	776.491	30061.8	14314.2	11.6091	11.6091	0.882169	0.860175	ATCATCAGCGACG	ATCATTAGCGACG	1	1	1	0	0	0	1
722172	6	164879	6	179450	1	1	UBP6	1927.62	1518.37	29319.3	29730.9	9.06161	9.06161	0.855456	0.877458	ATCACTTTTTACG	ATCACTTCTTACG	1	1	1	3	0	0	1
722215	6	164921	6	179493	1	1	UBP6	1626.99	2432.71	29664.6	43582.2	9.06161	9.06161	0.855456	0.877458	ATCACTTTTTACG	ATCACTTCTTACG	1	1	1	3	0	0	1
723958	6	169733	6	184299	1	1	IOC3	863.677	954.92	12514.9	13188.2	8.83697	10.8755	0	0	CGCATAAGGAAAG	CGTACAAG-AAAG	0	0	3	2	0	0	0
724004	6	169779	6	184345	1	1	IOC3	711.406	676.2	12294.3	11584.5	8.83697	8.83697	0.882169	0.882169	ATCGTGCTTCACG	ATCGTGCTTCACG	1	1	0	0	0	0	1
726998	6	183159	6	197251	1	1	IGD1	3786.07	1007.1	57566.5	16912.1	9.89418	9.43675	0	0	AGATTCTACCATG	AGATTTTACCATG	0	0	1	1	0	0	0
727045	6	183113	6	197204	1	1	IGD1	4775.41	1510.42	80268.6	24632.6	9.05234	9.43675	0.899452	0.921446	ATCACTGGTTACG	ATCACGGCTTACG	1	1	2	2	0	0	1
727373	6	184417	6	198505	1	1	YFR018C	2520.8	2693.05	46453.2	48246.4	9.39808	9.39808	0.626866	0.626866	GTACTTCTTGACG	GTACTTCTTGACG	1	1	0	0	1	0	0
727440	6	184350	6	198438	1	1	YFR018C	1101.68	1623.53	20938.8	24622.7	7.35343	6.71059	0	0	GGCAACGCAAACG	GGCAACGCAAACG	0	0	0	0	0	0	0
733059	6	210263	6	224001	1	1	CDC14	2472.92	1110.44	38337.3	17578.8	9.06161	9.06161	0	0	ATCTCTAC----T	-TCCCTACCTTCT	0	0	6	4	0	0	0
733099	6	210223	6	223963	1	1	CDC14	1988.91	1416.84	30494.8	23379.9	9.06161	9.06161	0.877458	0.877458	ATCACTTTCAACG	ATCACTTTGAAC-	1	1	2	3	0	0	1
734122	6	225046	6	238765	1	1	QCR6	1656.31	952.783	26810.2	17191.5	8.10111	8.44296	0	0	CTACCTTCATGCG	CCACCTTCATGCA	0	0	2	2	0	0	0
734223	6	224946	6	238664	1	0	QCR6	689.592	402.254	10867.9	6945.23	8.80749	6.63487	0	0.478398	GGACTGGGGCGCG	GGACCGGGGCACG	0	1	2	0	1	1	0
737120	6	241579	6	255161	1	1	DUG1	943.123	670.891	14256.5	9881.63	8.37958	7.69029	0.82875	0.82875	GTCATTCAAAACG	GTCATTCAAAACG	1	1	0	1	0	0	1
745770	7	475408	7	476557	1	1	SCL1	1272.83	1677.5	24545.9	31503.5	9.06283	9.06283	0	0	ATGCCAAGGTAAA	ACGTTAAAGTAAC	0	0	5	3	0	0	0
745824	7	475354	7	476504	0	1	SCL1	478.246	2127.48	18869.5	29797.8	9.06283	9.78349	0.877458	0.899452	ATCACAATAGACG	ATCACAATCGACG	1	1	1	4	0	0	1
745845	7	475337	7	476483	1	1	SCL1	2171.44	866.145	30974	16365.6	7.11491	7.03585	0	0	GGCACACACCAAT	GAC-CATATCAAT	0	0	4	2	0	0	0
747201	7	465586	7	466805	1	1	PUF4	2504.75	1123.84	44887.4	16863.9	7.96853	7.96853	0	0.483111	TTAATTTGTGACG	CTAATTTGTGACG	0	1	1	0	0	0	0
747240	7	465625	7	466841	1	0	PUF4	2313.65	353.848	42902.2	8316.65	7.96853	7.96853	0.912016	0.912016	GTCACTCTTGACG	GTCACTCTCAACG	1	1	2	3	0	0	1
748343	7	452204	7	453429	0	1	PIB2	589.436	1190.91	11076.5	19634.9	8.11754	9.89418	0.934017	0.934017	GTCACCATCGACG	GTCACTACCGACG	1	1	2	1	0	0	1
753864	7	428409	7	428972	1	1	PNC1	6595.24	3523.76	115946	97948.7	8.28099	8.16642	0.82875	0.816179	GTCATTGTTAACG	ATCATTTCTAACG	1	1	3	4	0	0	1
753918	7	428364	7	428922	1	1	PNC1	6077.1	2346.71	95750.9	49605.7	11.3052	10.3478	0.82875	0.816179	GTCATTGTTAACG	ATCATTTCTAACG	1	1	3	4	0	0	1
753958	7	428329	7	428889	1	1	PNC1	7510.48	11196.8	141814	202227	11.3052	10.3478	0.82875	0.794185	GTCGTTATATACG	----TTAAATACG	1	1	5	4	0	0	1
754140	7	428156	7	428717	1	1	PNC1	4448.93	3046.18	74811.9	56384.3	7.3221	6.81411	0.912016	0.912016	GTCTCCAGATACG	GTCTCCAGATACG	1	1	0	1	0	0	1
757820	7	413236	7	414472	1	0	RIM8	1737.07	133.069	27850.5	2316.98	7.36079	5.93863	0	0	ATTATATAGTCCG	A--GCATAGTCCG	0	0	4	1	0	0	0
757859	7	413275	7	414507	1	0	RIM8	1638.23	2.00462	25496.4	224.854	7.36079	5.75012	0.601728	0	AGCACTTTCAACG	AATACTTTCAACG	1	0	2	2	0	0	0
762886	7	401428	7	399229	1	1	ERV14	762.036	934.982	12920.9	15326.4	9.05234	8.16642	0	0	AAAACAAGGAAGG	AAAACAAGGAAGG	0	0	0	0	0	0	0
763637	7	397998	7	395823	1	0	SDS23	752.742	567.421	11540.1	9221.46	9.63438	6.7557	0	0.741555	ATTCTCCGTGACT	ATACCCCGGGACG	0	1	4	4	0	0	0
763688	7	397949	7	395772	1	0	SDS23	707.374	52.716	10927.8	3395.74	9.63438	10.1896	0.838181	0.877458	ATCATTATGCACG	ATCGCTATATACG	1	1	4	3	0	0	1
765764	7	383335	7	381199	1	1	MRH4	928.269	2125.59	19017.2	30112.9	9.06161	11.2505	0	0	CTTGCACAGCACA	GTTGAACAGCCCA	0	0	3	2	0	0	0
765811	7	383290	7	381153	1	1	MRH4	1716.36	2636.93	26935.5	37300.7	9.06161	11.2505	0.899452	0.899452	ATCACTTACCACG	ATCACTTACCACG	1	1	0	3	0	0	1
769397	7	364246	7	362110	1	1	HNM1	695.788	1605.23	20076.9	21951.1	8.11348	8.11348	0	0.483111	CTAGTGAATAACA	CTAGTGAATAACG	0	1	1	2	0	1	0
769439	7	364205	7	362068	1	1	HNM1	1585.86	1184.95	26223.6	17683.6	7.91454	7.91454	0.850744	0.82875	GTCATTACTGACG	GTCATTATTGACG	1	1	1	1	0	0	1
769474	7	364171	7	362033	1	1	HNM1	1669.76	1157.23	28775.2	18825.9	7.42488	7.42488	0	0	GGCTTTATTTTCT	GGCTTCGTTTTCT	0	0	2	2	0	0	0
784340	7	307247	7	306196	1	1	ARC1	1705.07	3110.4	30117.5	50678.4	9.00721	9.00721	0.806756	0.806756	GTCATTATTAACG	GTCATTATTAACG	1	1	0	2	0	0	1
784390	7	307297	7	306246	1	1	ARC1	1425.61	2267.08	23232.9	35157.2	9.00721	9.00721	0.806756	0.806756	GTCATTATTAACG	GTCATTATTAACG	1	1	0	2	0	0	1
784698	7	306452	7	305439	1	1	RMD9	1281.83	1530.68	22316.4	24175.4	8.16642	10.9008	0	0	ATACTCAGAGTAG	ATACTCAAAGCAG	0	0	2	2	0	0	0
784743	7	306407	7	305394	1	1	RMD9	1136.77	1056.98	20305.3	18197.9	8.16642	10.9008	0.838181	0.860175	ATCATTACACACG	ATCATTGCACACG	1	1	1	3	0	0	1
790690	7	280717	7	278963	1	1	NAB2	1707.32	1165.55	28779.7	21075.3	10.7219	8.83697	0	0	TTCACATTAAACT	TTCATATTCGGCG	0	0	5	2	0	0	0
790737	7	280671	7	278917	1	0	NAB2	861.301	281.941	13212	4186.01	10.7219	8.83697	0.666143	0.644148	GTAACGATGTACG	GTAACGATATACG	1	1	1	2	1	0	0
791192	7	277374	7	275695	0	1	MON1	402.407	1377.33	14122.9	17388.2	9.80863	9.80863	0	0	CTATTTTTTCATC	CTAATTTTTCACC	0	0	2	2	0	0	0
791214	7	277353	7	275673	1	0	MON1	2102.43	525.132	32593.2	12548.5	12.1345	12.1345	0.82875	0.82875	GTCATCATTAACG	GTCATCATTAACG	1	1	0	3	0	0	1
791283	7	277286	7	275606	1	1	MON1	773.197	782.975	15416.2	15055.4	7.4401	6.79095	0	0	TTGATGGAAAACG	TTGGCAGAAAACA	0	0	4	3	0	0	0
791451	7	277132	7	275453	1	0	MON1	1791.61	6.52554	28092.8	208.456	7.29213	6.62205	0.592302	0	ATAGTTTTCTACG	AAAGCTTTCTACG	1	0	2	5	0	1	0
791932	7	272105	7	270415	1	1	MET13	2910.98	3391.89	52186.3	64290.5	9.89418	10.7476	0.597015	0.562451	GGCCTTGTCTACG	GGCGTTGTCTATG	1	1	2	1	0	1	0
791976	7	272149	7	270459	1	0	MET13	965.658	416.672	13965.5	9996.7	10.9008	10.7476	0.872739	0.850744	GTCATACTGGACG	GTCATAGTGAACG	1	1	2	1	0	0	1
805329	7	197232	7	196316	0	1	RAD54	286.888	1249.38	8802.2	18827	7.69029	5.26292	0.816179	0.838181	ATCATTGAAAACG	ATCATTGACAACG	1	1	1	3	0	0	1
805381	7	197180	7	196267	1	1	RAD54	1138.47	1229.35	17428.3	20151.1	8.16642	5.96578	0.816179	0.838181	ATCATTGAAAACG	ATCATTGACAACG	1	1	1	3	0	0	1
806819	7	190952	7	190138	1	0	PMR1	949.701	130.83	17375.3	2147.38	7.4353	7.1503	0.592302	0	ATATTCTTTCACG	ATACTCTTTCAAA	1	0	3	1	0	0	0
809097	7	180585	7	179727	1	1	XRN1	1693.66	1850.42	25101.3	34573.5	9.06283	9.06283	0	0	GTCTTTTTCAACT	AGCTTTTTCAACT	0	0	2	0	0	0	0
809139	7	180545	7	179685	1	1	XRN1	1310.48	1559.4	24817.9	26568.2	9.06283	9.06283	0.899452	0.899452	ATCACTCAACACG	ATCACTCAACACG	1	1	0	2	0	0	1
816889	7	148112	7	147292	1	1	CDC55	2173.64	1593.76	34422.1	23924.2	10.6124	8.5041	0.934017	0.899452	GTCACCTTCC--A	ATCAC--TCCATA	1	1	5	4	0	0	1
816944	7	148059	7	147239	1	0	CDC55	1848.22	615.297	24502.4	10159.7	8.1643	7.45247	0.934017	0.899452	GTCACCTTCC--A	ATCAC--TCCATA	1	1	5	4	0	0	1
818086	7	141862	7	141053	1	1	IME4	3264.5	2179.65	48734.3	33775.4	9.43675	9.43675	0	0	GCATCTTGAAACG	GCATCATGAAACG	0	0	1	1	0	0	0
818129	7	141905	7	141094	1	1	IME4	1382.96	772.91	24956.3	18061.4	9.43675	9.43675	0.877458	0.877458	ATCACGTTTAACG	ATCACGTTTAACG	1	1	0	4	0	0	1
818302	7	142071	7	141259	1	1	IME4	2118.43	1555.35	34612.4	26432.4	6.92455	6.92455	0	0	GTTCTTTCTTTCG	G--CTTTCTTTCG	0	0	2	1	0	0	0
818962	7	131370	7	130569	0	1	GCN1	328.648	775.149	5319.18	11451.3	7.25626	8.1643	0.872739	0.82875	GTCGTTACGTACG	GTCGTTTAATACG	1	1	3	0	0	0	1
820007	7	124333	7	123545	1	1	MDS3	776.72	1251.57	12693.1	19834.4	8.11754	6.89975	0	0	CTAGTTACATATG	CTAGT--CAAATA	0	0	4	2	0	0	0
820046	7	124372	7	123584	0	1	MDS3	580.821	735.568	10202.9	13088.2	6.89315	6.89508	0.856241	0.834247	CTCGCGAGCCACG	CTCGCGAGCTACG	1	1	1	1	1	0	0
824797	7	98723	7	98227	1	1	SPT16	693.454	756.638	10225.9	11056.8	7.55507	7.4401	0.899452	0.877458	ATCACAAACCACG	ATCACATACTACG	1	1	2	1	0	0	1
827066	7	93630	7	93071	1	1	YPT32	852.304	1183.23	16221.1	21297.3	8.80749	7.83518	0.570306	0	ATATTATGTTACG	ATATTATGTTACA	1	0	1	1	0	1	0
827104	7	93668	7	93109	1	1	YPT32	1056.86	1662.42	18667.3	27025.3	8.80749	7.83518	0.570306	0.570306	ATAATATAGTACG	ATAATATAGTACG	1	1	0	0	1	0	0
829585	7	81375	7	80726	1	1	EDC1	1842.79	1217.33	31017.3	23323.3	10.8161	8.76001	0	0	ATGGCTATATAGG	ATAGCTATAT---	0	0	4	4	0	0	0
829633	7	81327	7	80678	1	1	EDC1	2125.52	1290.81	35992.7	20969.5	10.8161	8.76001	0.816179	0.838181	ATCATTTTACACG	ATCATTTCACACG	1	1	1	3	0	0	1
831925	7	76572	7	75957	1	1	VRG4	1559.59	1762.85	24421.1	24691.7	9.06283	8.11754	0.514532	0.838181	ATCACAGTTGACG	ATCATAGTTGACG	1	1	1	1	0	1	0
831978	7	76624	7	76008	1	1	VRG4	1703.84	1284.5	32521.5	24021.8	11.6091	9.80863	0.899452	0.838181	ATCACAGTTGACG	ATCATAGTTGACG	1	1	1	1	0	0	1
833060	7	67467	7	68675	1	1	SAP4	708.817	2583.27	11740.6	35208	7.81424	10.8755	0	0	CGCTTACTTTAAG	-GCTTCCTTTAAG	0	0	2	1	0	0	0
833101	7	67427	7	68636	0	1	SAP4	87.764	2322.08	1773.53	44263.5	6.79103	10.8755	0.838181	0.921446	ATCATCATGTACG	ATCCCCTTGTACG	1	1	3	5	0	0	1
835162	7	56319	7	57508	1	1	ADE5,7	786.778	1025.57	12350	15847.3	7.4034	7.4034	0	0	GGCACTTGTCACT	GGCACTTGTCACC	0	0	1	1	0	0	0
841425	7	31764	7	32979	0	1	RMR1	372.36	1498.48	6143.48	23913.3	8.11754	9.43675	0	0	CGGATTATAAACA	CGAATTATAGACA	0	0	2	4	0	0	0
841470	7	31808	7	33024	1	1	RMR1	694.94	1757.32	10568.3	28659.4	8.11754	9.43675	0.860175	0.921446	ATCATGTACCACG	ATCACGTACCACG	1	1	1	3	0	0	1
843482	7	23377	7	24604	1	0	HXK2	1289	600.795	19451.3	8856.32	6.0389	8.66116	0	0	CTCTGGAGCCCCG	CCCTGGAGCCCCG	0	0	1	1	0	0	0
843544	7	23438	7	24666	1	1	HXK2	2224.7	1064.77	36422.9	17984.4	6.59297	6.66544	0	0	ATGTTACTACGAG	GTGTGACTACCAG	0	0	3	2	0	0	0
843584	7	23478	7	24703	0	1	HXK2	632.172	1110.25	11332.3	16010.3	6.59297	8.09605	0.904163	0.882169	ATCATGCCGGACG	ATCATGCCGTACG	1	1	1	3	0	0	1
849809	7	506828	7	507927	1	1	ECT1	929.076	1541.92	14860.3	22988.6	7.55507	6.84187	0	0	AGAATGGTATACC	GGAATGGTATGCC	0	0	2	0	0	0	0
849854	7	506873	7	507972	1	1	ECT1	679.322	1501.55	11990.5	21590.7	8.83697	10.3478	0.965434	0.94344	ATCGCGTGGCACG	ATCGCGTAGCACG	1	1	1	3	0	0	1
857450	7	547497	7	543660	1	0	GSC2	1003.34	478.706	16366.6	7837.19	7.67777	6.83286	0	0	AATCCTCGTGCCG	AGTCCTCGTGCCG	0	0	1	0	0	0	0
857502	7	547549	7	543712	1	1	GSC2	1081.86	1614.16	19738	28951.4	8.28099	6.82211	0.872739	0.872739	GTCATGTGCTACG	GTCATGAGCTACG	1	1	1	4	0	0	1
860941	7	560256	7	556410	0	1	ACB1	660.437	1723.41	12720.3	25583.7	8.33343	12.1345	0	0	TTCCTAAACTACA	ATTTTACACCACA	0	0	5	2	0	0	0
860989	7	560210	7	556366	0	1	ACB1	620.077	751.178	9532.75	10928.3	8.4751	8.4751	0.921446	0.899452	ATCTCTTCCGACG	-TCTCTTTCGACG	1	1	2	2	0	0	1
861073	7	560126	7	556282	0	1	ACB1	355.724	794.936	5866.73	13382.3	6.57208	6.57208	0	0	GAGTTTGCGGACG	GAGTTTGCGGACG	0	0	0	0	0	0	0
870504	7	601462	7	586711	1	0	RSC1	1037.93	619.306	17085.5	10105.5	7.35475	7.52545	0.877458	0.899452	ATCACTATTGACG	ATCACTCTAGACG	1	1	2	2	0	0	1
870573	7	601529	7	586778	1	0	RSC1	797.43	482.354	12037.2	8973.38	8.5041	8.5041	0.877458	0.899452	ATCACTATTGACG	ATCACTCTAGACG	1	1	2	2	0	0	1
872185	7	609747	7	594990	0	1	ERG25	496.834	1065.23	8025.95	17711.1	6.62205	6.81411	0.838181	0.816179	ATCATCTTCTACG	ATCATTTTCTACG	1	1	1	3	0	0	1
872228	7	609784	7	595031	0	1	ERG25	343.162	1215.64	8786.96	18951.8	6.62205	6.77294	0.838181	0.816179	ATCATCTTCTACG	ATCATTTTCTACG	1	1	1	3	0	0	1
873939	7	617982	7	603165	1	1	SPT4	1905.34	860.878	31596.4	18339	8.10111	8.83697	0	0	ATATTCATGTATA	ATATTCATGCATA	0	0	1	2	0	0	0
873987	7	617934	7	603118	1	0	SPT4	1937.3	407.545	25541.5	6931.92	11.3052	11.3052	0.890021	0.890021	GTCACCTTATACG	GTCACCTTATACG	1	1	0	3	0	0	1
875787	7	625340	7	610679	1	0	YGR067C	712.891	613.545	12679.3	11085.2	8.10663	8.10663	0.912016	0.978006	GTCACGTAAGACG	GTCGCGCAGGACG	1	1	3	0	0	0	1
886484	7	656563	7	641983	1	1	NNF2	978.815	1642.1	13873.5	26327.2	11.3052	10.8755	0.877458	0.899452	ATCGCATTATAC-	ATCGCATTGTACG	1	1	2	3	0	0	1
886540	7	656616	7	642039	1	1	NNF2	797.854	693.303	12752.3	13276.9	7.45247	6.68629	0.877458	0.899452	ATCGCATTATAC-	ATCGCATTGTACG	1	1	2	3	0	0	1
890163	7	677715	7	663707	0	1	ASK10	429.908	922.973	7108.84	16806.8	8.09605	8.09605	0.921446	0.899452	ATCGCTAGCAACG	ATCGCTAACAACG	1	1	1	1	0	0	1
890224	7	677776	7	663767	0	1	ASK10	401.558	815.771	5849.72	11793.4	10.1896	10.1896	0.921446	0.899452	ATCGCTAGCAACG	ATCGCTAACAACG	1	1	1	1	0	0	1
892024	7	695262	7	681223	1	0	GTF1	1182.31	579.918	17610.6	11672.5	9.76467	7.59425	0	0	ATTTTTTGCGATG	ATTTTTTGCGATG	0	0	0	0	0	0	0
892067	7	695223	7	681187	1	1	GTF1	1093.23	799.909	17882.7	11172.1	9.89418	7.59425	0.934017	0.978006	GTCACCACAGACG	GTCACCGCGGACG	1	1	2	4	0	0	1
894073	7	699951	7	685907	1	1	VOA1	3159.72	2092.02	58713	40480.3	10.8161	10.8161	0.890021	0.890021	GTCACATTACACG	GTCACATTACACG	1	1	0	3	0	0	1
894119	7	699905	7	685862	1	1	VOA1	2789.99	3402.75	51364.3	56561.5	10.8161	10.8161	0.890021	0.890021	GTCACATTACACG	GTCACATTACACG	1	1	0	3	0	0	1
898874	7	729888	7	710331	1	1	NUP57	761.357	1044.15	12766.2	16094.8	9.43675	8.16642	0.816179	0.816179	ATCATTTTGAACG	ATCATTTTGAACG	1	1	0	3	0	0	1
900835	7	739328	7	719596	1	1	PPT1	1913.83	988.867	30639.8	20599.5	10.8755	10.8755	0.562451	0.584446	AGCCTTAAGAACG	AGCCTTACGAACG	1	1	1	3	1	0	0
900881	7	739289	7	719550	0	1	PPT1	289.265	1802.04	7367.72	25262.6	10.8755	10.8755	0.899452	0.899452	ATCGCTTTGTACG	ATCGCTTTGTACG	1	1	0	4	0	0	1
900925	7	739257	7	719515	1	0	PPT1	1229.54	234.342	20008.3	4193.29	7.45738	5.66652	0	0	CTCTGC----CCA	CTCTGCTAAAGCA	0	0	5	8	0	0	0
903689	7	750284	7	730537	1	0	UTP8	2030.58	633.315	32794.7	11105.4	10.1408	8.66116	0	0	ATCGCAAATAT--	ATCGCAAAGATTC	0	0	3	5	0	0	0
903729	7	750244	7	730497	1	0	UTP8	1055.42	581.345	20366.5	10187.7	10.1408	8.66116	0.850744	0.82875	GTCATTCTACACG	GTCATTTAACACG	1	1	2	1	0	0	1
904508	7	754121	7	734408	1	1	YGR130C	1144.33	1222.91	17228.5	17709.5	6.51231	6.51231	0	0	CTACCATTGAAGG	CTACGATTTAAGG	0	0	2	0	0	0	0
904548	7	754082	7	734368	1	1	YGR130C	781.982	857.441	13811.5	15024.6	6.51231	6.51231	0.768264	0.768264	CTCACCTTAAACG	CTCACCTTAAACG	1	1	0	0	1	0	0
904642	7	753991	7	734275	0	1	YGR130C	92.6869	814.898	1555.56	10728.9	5.73093	9.89418	0	0	CTCTCCCGGTTCT	CTCTCCCAGTTCT	0	0	1	0	0	0	0
914807	7	780024	7	759956	1	1	THI4	1055.54	1946.07	14298.3	26872.9	6.18557	8.83697	0	0	GTTTTTTTTTACG	G--TTCTTTTACG	0	0	3	2	0	0	0
914846	7	780062	7	759994	1	1	THI4	994.687	1010.36	15111.4	18404.3	6.18557	8.83697	0.860175	0.597015	ATCGTTTTGGACG	ATCGTTTTGGACG	1	1	0	6	1	1	0
914875	7	780091	7	760022	0	1	THI4	532.356	1121.53	7098.7	16788.3	5.56499	8.28099	0	0	AGCCCTTTTTCTG	AG-CCTTCTCCCG	0	0	4	3	0	0	0
921444	7	806220	7	786370	0	1	MTR3	274.241	2111.9	5816.7	37201.4	10.1896	10.7476	0	0	T--TTTCTTCGAA	TCATTTCTTTCAA	0	0	4	2	0	0	0
921485	7	806179	7	786329	1	1	MTR3	1112.79	2181.91	16814.3	30888.4	10.1896	10.7476	0.899452	0.816179	ATCGCTAGATACG	ATCGTTATATACG	1	1	2	2	0	0	1
922830	7	810134	7	790234	1	0	RTS3	1403.59	138.571	22586.8	2800.62	8.83697	10.3477	0.860175	0	ATCATCATGGACG	CTCATTACGATCG	1	0	5	0	0	1	0
922872	7	810092	7	790192	1	0	RTS3	1257.64	220.737	17105.8	3336.62	8.72652	9.37556	0.860175	0.49725	ATCATCATGGACG	CTCATTACGATCG	1	1	5	0	0	1	0
923326	7	809644	7	789748	1	1	RTS3	733.602	831.597	11024.5	12342.2	10.8755	10.8755	0	0	ATCGTTGAGTACA	ATCGTTGAGTACA	0	0	0	0	0	0	0
923416	7	809556	7	789661	1	1	RTS3	767.723	888.75	12791.2	14987.1	7.55981	8.16642	0	0	ATCTTCGGCCTCA	ATCTTCGGCCTCA	0	0	0	3	0	0	0
925050	7	823709	7	797242	0	1	TIF4631	362.048	764.379	5367.95	12448.8	11.6091	11.6091	0	0	TCATCCCATTACG	TCACTCCACTACG	0	0	3	3	0	0	0
925093	7	823752	7	797201	0	1	TIF4631	315.534	1211.87	5223.53	18577.8	11.6091	11.6091	0.860175	0.860175	ATCGTTTCTCACG	-TCGTTTCTCACG	1	1	1	1	0	0	1
927730	7	832257	7	802379	1	1	CLC1	1554.63	1352.27	26455.2	22571.6	10.8161	10.8161	0.877458	0.877458	ATCACATTACACG	ATCACATTACACG	1	1	0	2	0	0	1
927775	7	832302	7	802419	1	0	CLC1	1008.18	341.82	17328	9956.47	10.8161	10.8161	0.877458	0.877458	ATCACATTACACG	ATCACATTACACG	1	1	0	2	0	0	1
927806	7	832333	7	802449	1	1	CLC1	719.003	786.773	9944.83	11253.7	6.46119	5.87337	0	0	ATATTTTTTTACA	-TTTTTTTTTACA	0	0	2	5	0	0	0
933451	7	859710	7	830557	1	1	QCR9	2709.1	2862.24	41249.1	42165	9.39237	9.70093	0.816179	0.838181	ATCATTATACACG	ATCGTTATACACG	1	1	1	1	0	0	1
933530	7	859631	7	830478	1	1	QCR9	1392.72	1368.01	19618.3	22911.9	8.28099	8.28099	0	0	ATGCCGAAAGAAT	ATGCCGAAAGAAT	0	0	0	0	0	0	0
934123	7	867672	7	838533	1	1	TYS1	1075.7	807.819	15931.2	14128.6	10.3477	11.2505	0.877458	0.855456	ATCACTAAGAACG	ATCACTATAAACG	1	1	2	2	0	0	1
934170	7	867631	7	838486	1	1	TYS1	808.549	957.991	14883.9	14890.7	10.3477	11.2505	0.877458	0.855456	ATCACTAAGAACG	ATCACTATAAACG	1	1	2	2	0	0	1
934749	7	871656	7	842514	1	1	HGH1	778.629	1180.52	14498.5	19798	9.21923	8.1456	0	0	ATCCCAATTGGCT	ATCCTTTTTGGTT	0	0	4	2	0	0	0
934789	7	871616	7	842475	1	0	HGH1	1238.29	656.858	21404	15442.3	9.21923	8.1456	0.94344	0.921446	ATCACCCCAGACG	ATCACCTCAGACG	1	1	1	4	0	0	1
944457	7	915054	7	886223	0	1	YGR210C	35.0122	779.351	649.572	14011.5	7.73473	7.73473	0	0.544383	TTTATAGTTGACG	CTAACTGTTGACG	0	1	4	2	0	0	0
946789	7	922008	7	893176	1	1	RSM27	1775.48	894.782	30424.7	16121.2	11.2505	11.2505	0	0	ATAGCTAACTACT	ATAGCTAATTACT	0	0	1	3	0	0	0
946831	7	922049	7	893218	1	1	RSM27	1885.78	1181.37	31653.6	17835.1	11.2505	11.2505	0.855456	0.855456	ATCACTATATACG	ATCACTATATACG	1	1	0	2	0	0	1
949282	7	939837	7	910502	1	1	TOS2	937.394	1786.49	16845	29575.8	9.00721	9.39808	0.877458	0.899452	ATCACGATTAACG	ATCACGATCAACG	1	1	1	3	0	0	1
949404	7	939716	7	910382	0	1	TOS2	576.28	1565.56	10733.1	28557.6	6.26389	5.59556	0	0	GTCTTACTATGCG	GCCTTTCTATGCG	0	0	2	1	0	0	0
952500	7	953829	7	924573	1	0	PHB2	983.78	436.399	16189.3	7104.61	5.98444	7.21778	0	0	ATCATACTTGACA	ATCATACTTGACA	0	0	0	2	0	0	0
952641	7	953691	7	924436	1	1	PHB2	936.503	811.912	14552.9	12424.8	10.3477	10.3477	0	0	CTAAACGGATACG	TTCAACATATACG	0	0	4	4	0	0	0
952685	7	953647	7	924392	1	0	PHB2	1911.5	475.082	25043.5	10430	10.3478	10.3477	0.877458	0.855456	ATCACTATCAACG	ATCACTATAAACG	1	1	1	2	0	0	1
957281	7	974706	7	945507	0	1	PFK1	221.914	1640.48	4002.64	22340.9	6.22176	8.08055	0	0.553024	GGTTCAATCTACG	GGCATAATCTACG	0	1	3	2	0	0	0
957347	7	974640	7	945443	0	1	PFK1	197.299	1994.76	3689.14	34763.2	9.76467	7.36079	0.838181	0.728987	ATCGTTTTCAACG	ATCGTTTTCAACG	1	1	0	7	1	1	0
963826	7	996704	7	967326	1	1	GCN5	1204.38	1423.05	16158.2	22050.9	8.16642	11.3052	0	0	ATATTCATATATT	GTATTGATGTATT	0	0	3	5	0	0	0
963864	7	996742	7	967364	1	1	GCN5	811.647	1254.48	12220.2	18282.1	8.16642	11.3052	0.794185	0.806756	ATCATTATATACG	GTCATTTTATACG	1	1	2	1	0	0	1
964481	7	1000254	7	970822	1	0	PUP2	1457.32	493.335	21698	7283.86	8.22048	10.0525	0.956012	0.956012	GTCCCGCTTCACG	GTCCCGCTTCACG	1	1	0	3	0	0	1
964557	7	1000182	7	970746	1	0	PUP2	859.391	366.622	13333.9	6302.01	6.09094	6.54941	0	0	TGCATCAATGACC	TGCGTCAACGAGT	0	0	4	0	0	0	0
965462	7	999319	7	969926	1	0	PUP2	1505.27	0	25823.1	516.174	10.3477	9.44754	0	0	GACTTGGGCTACA	AACT--GGC--CA	0	0	5	3	0	0	0
965502	7	999279	7	969900	1	0	PUP2	1218.04	559.83	18464.6	8611.23	10.3477	9.44754	0.877458	0.877458	ATCACTATTCACG	ATCACGATATACG	1	1	3	7	0	0	1
969965	7	1022070	7	992708	1	0	MES1	1042.43	180.325	14712.2	4158.98	9.43675	8.36088	0.94344	0.956012	ATCACGAGGCACG	GTCACGAGGCACG	1	1	1	2	0	0	1
971597	7	1027109	7	997753	1	1	HUA1	2511.08	1124.69	41039.5	18005.4	10.3477	10.3477	0.855456	0.877458	ATCACTAAAAACG	ATCACTAAACACG	1	1	1	5	0	0	1
971897	7	1026812	7	997458	1	1	HUA1	1808.33	3501.96	34396.7	65573.1	8.16642	9.44754	0	0	ATCGCTTTTTTCC	ATCGCCTTTTTTA	0	0	3	1	0	0	0
971954	7	1026755	7	997401	1	1	HUA1	1823.14	3696.86	32407.5	66621.4	9.89418	8.36088	0.816179	0.82875	ATCATTTTCTACG	GTCATTTTCTACG	1	1	1	3	0	0	1
973508	7	1031639	7	1002316	0	1	SLH1	24.742	1298.32	494.118	21558.4	7.27457	6.98598	0	0	ATATATATACAAG	TAATAAATACAAG	0	0	3	3	0	0	0
973574	7	1031700	7	1002379	0	1	SLH1	95.0635	1405.38	1570.12	20916.4	7.91454	7.91454	0	0	TTACCCGAAAC-G	TTACCCGAAGCCG	0	0	2	2	0	0	0
976578	7	1058979	7	1029703	1	1	BGL2	1362.42	1631.99	21603.3	25173.5	6.62205	10.1896	0.838181	0.921446	ATCGTTTTCTACG	ATCGCTGTCTACG	1	1	2	2	0	0	1
981963	7	1069276	7	1052057	1	0	IMA1	795.223	3.26277	11836.3	43.9089	10.6124	8.44296	0	0	TCGT------ACA	TTGTTTCATCACG	0	0	8	4	0	0	0
983531	8	102514	8	90412	1	1	LAG1	1123.96	2648.12	16072.3	40863.6	10.3477	10.3477	0	0	AGAATCCATTGCG	AGACCTCATTGCG	0	0	3	4	0	0	0
983571	8	102479	8	90372	0	1	LAG1	604.587	2688.28	10163.7	35136	10.3477	10.3477	0.855456	0.855456	ATCACTAATAACG	ATCACTAATAACG	1	1	0	6	0	0	1
984967	8	98337	8	86266	1	0	STE20	1332.63	506.729	22441.7	9369.64	9.21923	8.36088	0.860175	0.544383	ATCGTCTTCTACG	TTCGTATTCTACG	1	1	2	2	0	1	0
995410	8	56005	8	50084	1	0	RIM4	1159.18	115.69	18568.1	1989.68	6.54941	7.06681	0	0	ATTCCTTG--TGA	ATT--TTGTTTGT	0	0	5	2	0	0	0
995638	8	56226	8	50301	1	0	RIM4	978.475	27.1255	15273	497.687	7.91446	7.87207	0	0	CGACCTATCTCCG	CGATCTATCTCCG	0	0	1	2	0	0	0
995673	8	56261	8	50336	1	0	RIM4	972.152	110.23	17324.6	2027.73	7.91446	5.94118	0.860175	0	ATCATGCAACACG	ATCATGCAACATG	1	0	1	1	0	1	0
997007	8	50860	8	44902	1	1	RIM101	1650.62	2565.42	27272	40882.5	9.96482	9.96482	0.894733	0.894733	GTCATCTCGGACG	GTCATCTCGGACG	1	1	0	0	0	0	1
997043	8	50894	8	44937	1	1	RIM101	919.4	1727.23	16786.6	31548.6	8.1456	7.12767	0.838181	0.82875	A-TCA-TTTCAGA	AGTCATTTTCA-A	1	1	3	0	0	0	1
997088	8	50939	8	44982	1	1	RIM101	921.777	1524.41	14672.7	23952.1	5.66975	6.26389	0	0	ATCTTTTGTCTCG	ATTTTTTGGTTCG	0	0	3	1	0	0	0
997765	8	48193	8	42252	1	1	OCA5	1242.23	1915.47	23060.1	32868	8.83697	11.3052	0	0	GTTGTTGTTGCCG	GTTGTTGCTGTCG	0	0	2	2	0	0	0
997813	8	48146	8	42207	1	1	OCA5	1541.09	1186.15	25709.3	19660.3	8.1719	10.7476	0.838181	0.838181	ATCATTTGAGACG	ATCATTTGAGACG	1	1	0	2	0	0	1
997874	8	48085	8	42149	1	1	OCA5	1071.54	1344.42	17307.8	18821.8	5.02785	4.70371	0	0	ATATTTTTCATTT	ATATTTTTCA--A	0	0	3	2	0	0	0
1000598	8	34319	8	28359	1	1	SBP1	733.347	989.745	12876	17082.4	8.10111	8.10111	0	0	ATATTTTAAAATT	ATATTTCAAAATT	0	0	1	1	0	0	0
1000642	8	34275	8	28315	1	1	SBP1	708.605	892.759	8790.66	11131.9	10.08	10.08	0.956012	0.956012	GTCCCAGGTGACG	GTCCCAGGTGACG	1	1	0	0	0	0	1
1006995	8	122560	8	110370	1	1	ERG11	2009.15	682.81	36989.4	12262.4	6.54258	6.21971	0	0	GTTCTTGTTATTG	GTTCTTGTTATTG	0	0	0	1	0	0	0
1007109	8	122446	8	110256	1	1	ERG11	3535.81	1460.88	50271.1	22526.8	8.80749	8.80749	0	0	GGGACAGGCGGCG	GGGACAGCCGGCG	0	0	1	0	0	0	0
1007218	8	122339	8	110158	1	1	ERG11	1433.29	1030.09	23707.1	16882.9	10.7219	10.7219	0.626866	0.626866	GTAATGTCACACG	GTACTGTTACACG	1	1	2	2	1	0	0
1009789	8	129404	8	117195	0	1	VPS29	25.2512	725.846	466.278	10632.4	6.76402	7.71295	0	0.94344	ACCTCGCCACGCG	ATCTCGCCACACG	0	1	2	1	0	1	0
1010988	8	131935	8	119730	0	1	ARD1	248.608	792.871	3596.29	11940.1	9.80863	9.80863	0.688138	0.626866	GTACCTTTGCACG	GTACTTTTGCACG	1	1	1	2	1	1	0
1012614	8	143701	8	131972	1	1	DED81	761.866	670.867	10957.9	10593.8	8.72652	8.24355	0.921446	0.956012	ATCACCATGCACG	GTCACTGCGCACG	1	1	4	2	0	0	1
1015189	8	164892	8	152435	1	1	RPN1	1975.58	1949.12	36171.2	34342.1	7.12767	11.3052	0	0	ATATTTACATACT	ATATTTACATACT	0	0	0	2	0	0	0
1015229	8	164853	8	152395	1	1	RPN1	1156	695.711	17896.6	11828.9	7.12767	11.3052	0.838181	0.877458	ATCATCTTCTACG	ATCGCTTTATACG	1	1	4	3	0	0	1
1015264	8	164821	8	152360	1	1	RPN1	1206.59	1409.13	20639.8	22820.3	6.92455	6.92455	0	0	GTGGCAAAAGGCG	GTGGCAAAAGATG	0	0	2	2	0	0	0
1016304	8	170674	8	158164	1	1	SLT2	793.016	950.08	12577.2	14984	6.81411	6.81411	0	0	GTATAATTTAACA	GTATAAATTAACG	0	0	2	2	0	0	0
1016343	8	170635	8	158125	1	1	SLT2	685.264	817.95	12294.9	13176.3	6.81411	6.81411	0.94344	0.94344	ATCGCCGCATACG	ATCGCCGCATACG	1	1	0	0	0	0	1
1018894	8	190326	8	177773	1	1	SRB2	774.725	756.83	10691	10463.5	7.42644	7.42644	0	0	AAAATGCAAAACG	AAAATGCAAAACG	0	0	0	1	0	0	0
1018953	8	190267	8	177714	1	1	SRB2	1586.58	1313.48	23134.8	20245.6	10.3477	10.3477	0.899452	0.838181	ATCACAGTTCACG	ATCATAGTTCACG	1	1	1	2	0	0	1
1024063	8	209388	8	196332	1	1	COX6	4690.07	5988.04	77818.9	76245	10.3478	9.44754	0.921446	0.860175	ATCGCTCC-ATAC	ATCG-TCCTATAC	1	1	2	1	0	0	1
1024145	8	209469	8	196412	1	1	COX6	2177.25	3797.78	42417.2	58558.6	7.60481	7.60481	0	0	GGCGGAAATAACG	GGCGGAAATAACG	0	0	0	1	0	0	0
1025401	8	217995	8	202880	1	1	RSC30	1717.72	2335.28	33619.7	41923.4	10.9008	10.9008	0	0	TTGGC--GTCCTA	TCGGCATGTCC-A	0	0	4	3	0	0	0
1025443	8	217953	8	202838	1	1	RSC30	1535.87	1268.4	27878.1	22763.2	10.9008	10.9008	0.899452	0.921446	ATCACACTACACG	ATCACACTGCACG	1	1	1	0	0	0	1
1026505	8	222811	8	207771	1	0	GIC1	742.768	656.985	11020.5	9865.09	10.1896	10.3478	0.548311	0.877458	ATCACAATCCACG	ATCACAATCAACG	1	1	1	2	0	1	0
1027792	8	227359	8	212329	1	1	SSZ1	1871.01	1068.05	26969.6	16428.8	7.00157	7.00157	0.514532	0.492537	CGCTCCCATTACG	CGCTCTCATTACG	1	1	1	0	1	0	0
1027849	8	227310	8	212282	1	1	SSZ1	1926.65	4140.88	40914.8	58504.1	8.87506	9.89418	0.622152	0.912016	GTAACTATTTACG	GTCACTAGGTAC-	1	1	4	4	0	1	0
1027900	8	227259	8	212232	1	1	SSZ1	1446.92	1890.54	24843.1	29437.2	6.24759	7.27776	0.899452	0.921446	ATCACATTCGACG	ATCACATCCGACG	1	1	1	1	0	0	1
1029402	8	236341	8	221305	1	1	PCL5	1285.01	1788.86	20980	26956.7	5.56118	6.70248	0	0	ATCACAATTACCA	ATCACAATTACCA	0	0	0	0	0	0	0
1029461	8	236400	8	221364	1	1	PCL5	1136.26	1381.29	17133.2	20540.1	9.91254	9.7757	0.899452	0.934017	ATCGCTTCATACG	GTCGCTTCACACG	1	1	2	1	0	0	1
1032058	8	242404	8	227660	1	1	OSH3	1019.34	1080.76	17487.6	18492.6	7.45247	7.45247	0.51846	0.51846	AGCTTTTAATACG	AGCTTTTAATACG	1	1	0	1	1	0	0
1032354	8	246027	8	231293	1	1	QNS1	2186.59	1869.58	31940	28456.8	8.87506	8.87506	0	0	AGGACATATAAAG	AGGGTATATAAGG	0	0	3	1	0	0	0
1032395	8	246068	8	231334	1	1	QNS1	1720.52	1133.43	25758.9	21336.8	8.87506	8.87506	0.838181	0.838181	ATCTTTTTCGACG	ATCTTTTTCGACG	1	1	0	1	0	0	1
1036003	8	267420	8	252653	0	1	LAM4	357.125	917.344	5260.02	12910.7	8.72652	5.64625	0	0	TTTTTCTTCCACA	TTTTTCTTTCACA	0	0	1	2	0	0	0
1036066	8	267359	8	252590	0	1	LAM4	204.259	1303.43	3027.39	19117.4	7.84015	8.62509	0.912016	0.872739	GTCACGTTTCACG	GTCGTGTTTCACG	1	1	2	3	0	0	1
1039395	8	280623	8	265820	1	0	RTC3	728.254	196.639	13179	4425.4	7.85522	10.0525	0	0	CTACCCTGTTGGG	CTACCCTGCTGGG	0	0	1	3	0	0	0
1039800	8	281311	8	266512	1	1	RPF1	1995.74	668.525	32707.7	12083.6	7.87207	7.42488	0	0	ATTTCAATATACA	ATTTCTATATACA	0	0	1	1	0	0	0
1039862	8	281373	8	266574	1	1	RPF1	2352.4	817.8	39752.8	14172.2	10.6124	10.1896	0.860175	0.816179	ATCATGTGTGACG	ATCATATTTGACG	1	1	2	1	0	0	1
1040714	8	284765	8	269957	1	1	YNG2	2260.13	1594.65	36851.3	27689.5	10.8755	8.11754	0.899452	0.838181	ATCACGTTGTACG	ATCATGATGTACG	1	1	2	4	0	0	1
1040768	8	284714	8	269903	1	1	YNG2	2432.27	1387.54	34165.6	24998.5	9.43675	8.11754	0.899452	0.838181	ATCACGTTGTACG	ATCATGATGTACG	1	1	2	4	0	0	1
1041164	8	286880	8	272067	0	1	MSR1	160.038	917.218	2385.37	16735.2	9.00721	6.89005	0	0	ATTCCTA--ACCT	ATTCTTAGCACCA	0	0	4	3	0	0	0
1041210	8	286835	8	272021	0	1	MSR1	139.115	676.796	1925.29	9405.2	6.62205	6.89005	0	0	ATCAATAAATACG	ATCAATAAGTACG	0	0	1	3	0	0	0
1045453	8	299052	8	284135	0	1	PAL2	249.16	926.218	4199.77	16702.6	9.44754	9.44754	0	0	GTGGCTGTGGCCG	GTGGTTGTGGCCG	0	0	1	2	0	0	0
1045489	8	299016	8	284099	0	1	PAL2	154.266	803.641	2624.9	12900.4	7.67454	10.3477	0.548311	0.609584	ATAATTAAATACG	ATAACTAAATACG	1	1	1	0	1	1	0
1046415	8	302181	8	287279	1	1	SFB3	871.868	784.702	15350	13087	7.55439	6.5271	0.475255	0.475255	CGCATTGTGCACG	CGCATTGTGCACG	1	1	0	0	1	0	0
1047108	8	316266	8	301374	1	1	BIG1	2636.23	4319.02	44229.6	66395	8.26826	6.891	0.882169	0.894733	-TCATGCCACACG	GTCATGCCACACG	1	1	1	4	0	0	1
1047244	8	316131	8	301238	1	1	BIG1	1378.85	1489.69	23396.7	26945.6	13.3884	13.3884	0	0	ATCGCATACAATG	ATCGCATACAATG	0	0	0	2	0	0	0
1047281	8	316094	8	301201	1	1	BIG1	2985.67	4235.89	51682.8	68092.4	13.3884	13.3884	0.860175	0.860175	ATCATGCAACACG	ATCATCCAACACG	1	1	1	2	0	0	1
1049980	8	332941	8	318027	1	1	UBA4	3093.68	1830.98	52778.7	28936.6	10.3478	10.3478	0	0	ATATTATACTACC	ATATTATACAACC	0	0	1	1	0	0	0
1050024	8	332981	8	318071	1	1	UBA4	2058.76	1086.39	30242.7	16079.4	10.3478	10.3478	0.899452	0.899452	ATCGCTCATTACG	ATCGCTCATTACG	1	1	0	0	0	0	1
1051930	8	341654	8	326754	1	1	DMA1	1758.42	1496.58	29955.9	26084.1	9.06283	10.9008	0.614297	0.675569	ATATTCTCTCACG	ATATCCTCTCACG	1	1	1	3	1	1	0
1051973	8	341611	8	326712	1	1	DMA1	1475.35	1495.15	23033.6	23451	9.06283	9.43675	0.614297	0.675569	ATATTCTCTCACG	ATATCCTCTCACG	1	1	1	3	0	0	0
1058488	8	368269	8	354130	1	1	YHR131C	783.425	754.037	12779.7	12194.7	10.3477	7.51679	0	0	CCTTCAA--GTCA	C-TTCAAATGTCA	0	0	3	4	0	0	0
1058540	8	368217	8	354078	1	1	YHR131C	1154.47	974.966	17575.6	15288.3	8.83697	8.83697	0.860175	0.860175	ATCATCGTTGACG	ATCATCGTTGACG	1	1	0	0	0	0	1
1059878	8	375470	8	361337	1	0	SPL2	944.439	19.8535	15463.2	377.452	9.87881	7.36079	0.494108	0.60487	GTATTTTTGCTCA	GTATTTT--CTCA	1	1	2	1	0	0	0
1059982	8	375368	8	361239	1	0	SPL2	1175.43	60.7766	19775.5	1144.46	9.07399	9.44754	0.592302	0	ATTT--TCGTACG	ATTTCTTCGTCTG	1	0	4	5	0	0	0
1069416	8	422535	8	408058	0	1	YAP1801	657.848	1457.92	11645.2	23396.3	9.06161	9.06161	0.855456	0.877458	ATCACTTTTTACG	ATCACTTTTCACG	1	1	1	1	0	0	1
1070603	8	437157	8	422665	1	1	PRP8	4069.52	2935.58	71490.8	45271.8	9.07399	9.07399	0.816179	0.838181	ATCATTTAGTACG	ATCATTTGGTACG	1	1	1	0	0	0	1
1070656	8	437104	8	422612	1	1	PRP8	3665.29	2759.73	64600.7	44980.9	8.36088	8.16642	0.816179	0.838181	ATCATTTAGTACG	ATCATTTGGTACG	1	1	1	0	0	0	1
1073359	8	450766	8	436313	1	1	ENO2	839.784	1000.88	15455.3	17995.5	6.7025	7.67777	0	0	AT-ATTTATTATC	ATCCTTTACTCTC	0	0	4	2	0	0	0
1073393	8	450800	8	436347	1	0	ENO2	747.904	396.18	13344.8	6293.22	9.89418	9.89418	0.912016	0.890021	GTCACTAACGACG	GTCACTAACAACG	1	1	1	2	0	0	1
1082404	8	491715	8	477803	1	1	UTP9	1502.56	819.419	24545.7	13704.2	7.69029	9.21923	0	0	AACACTGAACAAG	AACACTGAACAAG	0	0	0	0	0	0	0
1082462	8	491773	8	477860	1	0	UTP9	2093.69	504.297	32274.1	13219.9	12.1345	9.21923	0.890021	0.82875	GTCACTTACAACG	GTCATTTACAACG	1	1	1	2	0	0	1
1082747	8	493738	8	479823	1	1	RIX1	911.549	767.919	13474.1	10314.3	7.02982	7.02982	0.838181	0.860175	ATCATTTGAGACG	ATCGTTTGAGACG	1	1	1	1	0	0	1
1082812	8	493803	8	479888	1	1	RIX1	822.342	769.37	13665.6	11948.7	6.03272	5.52394	0	0	GGGTCATCGCAAG	GGGTCATCGCAGG	0	0	1	0	0	0	0
1083300	8	498598	8	484672	1	0	AIM46	956.916	586.462	15660.7	9813.75	7.32323	9.44754	0	0	CGAACACTAAAGG	CGAACACTAAAGG	0	0	0	0	0	0	0
1083343	8	498555	8	484629	1	1	AIM46	1363.02	1424.5	21094.5	20862.4	11.3052	11.3052	0.816179	0.82875	ATCATTCTATACG	GTCATTCTATACG	1	1	1	4	0	0	1
1090285	8	522049	8	508195	1	0	YHR210C	829.514	148.125	15107.2	2291.51	7.35254	10.0525	0	0.47604	ATGCGACCTGACA	GTGCCACTTAACG	0	1	5	1	0	0	0
1092016	9	348959	9	343079	1	1	CFD1	1173.78	1534.86	18815.8	23323.7	8.09605	8.09605	0.877458	0.877458	ATCACATTAGACG	ATCACATTAGACG	1	1	0	0	0	0	1
1092062	9	349005	9	343124	1	1	CFD1	1108.42	1820.96	16204.7	27725.8	8.09605	8.09605	0.877458	0.877458	ATCACATTAGACG	ATCACATTAGACG	1	1	0	0	0	0	1
1096177	9	312667	9	305808	1	0	RPB3	1455.15	221.441	25094.7	3904.65	6.82211	6.82211	0.614297	0	ATACTTCTTGACG	ATACTTCTTGACA	1	0	1	2	0	1	0
1096247	9	312736	9	305878	1	0	RPB3	911.549	497.537	14346.7	9802.7	5.1212	6.42175	0.872739	0.872739	GTCATTGCGAACG	GTCATTGCGAACG	1	1	0	1	0	0	1
1098735	9	308098	9	301243	1	0	IRR1	1771.79	585.397	26898.6	9686.72	9.83373	6.59297	0.750982	0.750982	CTCATCTCTGACG	CTCATCTCTGACG	1	1	0	1	1	0	0
1098790	9	308043	9	301191	1	0	IRR1	939.898	472.373	13213.1	6221.14	7.97921	9.49276	0.750982	0.750982	CTCATCTCTGACG	CTCATCTCTGACG	1	1	0	1	0	0	0
1100246	9	300203	9	293076	1	1	SSM4	1575.97	2114.97	29575.9	38811.2	8.1719	7.03474	0	0	ATAGCCCTGTAGG	AAAGCCCTGTAGG	0	0	1	0	0	0	0
1100286	9	300163	9	293037	1	1	SSM4	847.805	1294.8	13079.1	19371.9	8.1719	7.46334	0.838181	0.882169	ATCATTAGAGACG	ATCATTGGGGACG	1	1	2	1	0	0	1
1100575	9	292381	9	285213	1	1	BCY1	1033.73	1191.71	17603.6	17466.5	8.28099	8.28099	0.82875	0.872739	GTCATTTCTAACG	GTCATTGCGAACG	1	1	2	2	0	0	1
1100630	9	292326	9	285158	1	1	BCY1	1714.33	731.794	29601.8	14986.4	8.09647	7.97921	0.82875	0.872739	GTCATTTCTAACG	GTCATTGCGAACG	1	1	2	2	0	0	1
1101756	9	289190	9	282060	1	1	CKA1	784.231	1456.55	16540.7	23584.1	10.3478	8.11754	0	0	TTTACATGTATCG	TTCACATGTATCG	0	0	1	2	0	0	0
1101781	9	289166	9	282035	1	1	CKA1	1611.84	1205.11	23610.6	20426.4	8.5041	9.43675	0	0	ATATCATATAAA-	ATATCATATAGAT	0	0	2	4	0	0	0
1101823	9	289124	9	281994	1	0	CKA1	1273.89	645.812	19536.2	10171.3	8.5041	9.43675	0.921446	0.877458	ATCACTCGGAACG	ATCACTTATCACG	1	1	4	1	0	0	1
1103360	9	285314	9	278190	1	0	CST6	686.494	319.216	11839.4	5723.07	6.82211	6.29847	0	0	CTCTATA-ATCAA	CTC-AGATATTAC	0	0	5	4	0	0	0
1103387	9	285341	9	278216	0	1	CST6	318.887	1068.41	5224.93	17114.9	10.8161	10.8161	0	0	ATATTATTCCCAG	ATACTATTGCCA-	0	0	3	2	0	0	0
1103427	9	285378	9	278255	1	0	CST6	1483.84	479.284	19463	8201.16	10.8161	10.8161	0.899452	0.899452	ATCACCTTACACG	ATCACCTTACACG	1	1	0	6	0	0	1
1104857	9	283202	9	276089	0	1	NOT3	421.759	688.228	7994.67	11343.7	6.16895	7.14065	0	0	ATATTTTTGAATG	ATTTTTTTTAATA	0	0	3	1	0	0	0
1105036	9	283029	9	275916	1	1	NOT3	1297.96	1376.61	21903.6	23580.9	10.9008	10.6124	0.934017	0.934017	GTCACCTTCCACG	GTCACCTTCCACG	1	1	0	2	0	0	1
1106033	9	276431	9	269321	0	1	PKP1	554	705.607	8856.82	11392.4	7.89996	7.89996	0	0	GTTATAGGTGAAG	GTTATAGGTGAAG	0	0	0	2	0	0	0
1106070	9	276394	9	269284	1	1	PKP1	812.156	1548.38	14759.5	26820.6	7.89996	7.89996	0.812253	0.812253	CTCGCTTCTCACG	CTCGCTTCTCACG	1	1	0	1	1	0	0
1106589	9	274006	9	266902	1	1	AGE2	1527.93	1232.13	24746.6	19141.7	8.10111	8.10111	0	0	TATATATA-TATG	TACATATACTAT-	0	0	3	5	0	0	0
1106615	9	273980	9	266876	1	1	AGE2	1539.94	1563.73	21168.4	23109.2	8.23736	8.23736	0	0	ATAGCGTATATAT	ATAGTGTATATAT	0	0	1	3	0	0	0
1106654	9	273942	9	266837	1	1	AGE2	2579.66	2668.15	42160.4	42992.2	11.3052	11.3052	0.904163	0.904163	ATCGTCCAGCACG	ATCGTCCAGCACG	1	1	0	1	0	0	1
1107747	9	268066	9	260984	0	1	SYG1	327.757	1024.55	4966.6	14906.4	6.56232	5.62659	0	0	GGCTTCCGACTCG	GGATCCCGACTCG	0	0	2	3	0	0	0
1107802	9	268011	9	260929	0	1	SYG1	337.136	1162.29	6151.03	20898	8.22048	9.43675	0.956012	0.921446	ATCCCGTCCCACG	ATCCCGTTCCACG	1	1	1	1	0	0	1
1108181	9	261020	9	253934	1	1	NEO1	1451.2	2120.36	26949.4	34575.2	9.44754	10.3477	0	0	ATAATAGTGAAAG	ATAATACTGAAAA	0	0	2	4	0	0	0
1108219	9	261058	9	253972	1	1	NEO1	1345.23	1118.4	21971.2	19059	7.91454	9.89418	0.806756	0.890021	GTCATTAAAAACG	GTCACTAGAAACG	1	1	2	1	0	0	1
1109763	9	254306	9	247269	0	1	GPP1	439.669	1334.21	6192.11	18225.5	9.06283	10.8755	0.921446	0.570306	ATCCCTTGGTACG	ATATTTTTCTACG	1	1	5	2	0	1	0
1109914	9	254457	9	247418	1	1	GPP1	927.718	923.292	13448.7	13352.4	7.05378	7.05378	0	0	GGTACTTCGCACC	CGGACCCCGCACC	0	0	4	0	0	0	0
1109960	9	254503	9	247464	1	1	GPP1	1427.14	2085.11	24057.3	32841.1	6.74483	6.74483	0.934017	0.934017	GTCTCAGTCCACG	GTCTCAGTCCACG	1	1	0	1	0	0	1
1110023	9	254566	9	247525	1	0	GPP1	796.581	439.234	13344	7373	8.28099	8.28099	0.746269	0.746269	CTCACTATTAACG	CTCACTATTAACG	1	1	0	1	1	0	0
1110090	9	254632	9	247592	1	1	GPP1	1099.55	808.33	14387.4	11015.3	9.39237	8.16642	0.746269	0.746269	CTCACTATTAACG	CTCACTATTAACG	1	1	0	1	0	0	0
1121149	9	216164	9	211085	0	1	RCI37	470.352	830.381	8593.57	12034	8.37958	10.6124	0	0	CTTTGACGAGACG	CTTCAAAGAGACG	0	0	3	0	0	0	0
1121196	9	216124	9	211039	1	0	RCI37	1213.08	31.6465	18831.2	922.696	6.10031	10.6124	0.644148	0.934017	TAACTA-TGAACG	TCACCAGTGA-CG	1	1	4	2	0	1	0
1121223	9	216099	9	211013	0	1	RCI37	124.474	1045.4	2879.91	16242.4	5.33795	7.83518	0	0	-----ATAAA--C	CGGAAATTAATGC	0	0	8	4	0	0	0
1121604	9	212343	9	207199	1	1	AIR1	1245.84	2650.08	21552	44439.1	7.32323	7.11491	0	0	AT--TTTTTTCAA	ATCATTTTTTCAA	0	0	2	1	0	0	0
1121644	9	212309	9	207159	1	1	AIR1	2124.67	991.876	33981.5	19081.7	9.06283	8.5041	0.816179	0.838181	ATCATCATATACG	ATCATCTCTTACG	1	1	3	3	0	0	1
1121812	9	212141	9	206996	1	1	AIR1	1083.3	1290.07	19269.7	21126.7	5.51864	5.16991	0	0	AAGACAAAGGACA	AAGACAAAGGACA	0	0	0	0	0	0	0
1125255	9	193357	9	193600	1	1	UTP25	1002.5	1048.16	15592.4	16186.7	9.39237	9.39237	0.860175	0.838181	ATCATGGTACACG	ATCATGATACACG	1	1	1	0	0	0	1
1125312	9	193300	9	193543	1	1	UTP25	1403.8	1286.78	22729.1	21706.3	6.05673	6.33498	0.860175	0.838181	ATCATGGTACACG	ATCATGATACACG	1	1	1	0	0	0	1
1128011	9	166198	9	160332	0	1	PFK26	304.246	681.829	5387.72	10581.5	11.3052	6.95068	0.806756	0.794185	GTCATATTATACG	ATCATATAATACG	1	1	2	5	0	0	1
1128089	9	166124	9	160255	1	0	PFK26	1526.11	546.821	25402.9	9464.66	9.43675	9.43675	0	0	ATTATTATTATCG	ACTGTTGCTGTCA	0	0	6	1	0	0	0
1128126	9	166088	9	160218	1	0	PFK26	757.113	192.865	13125.4	3314.19	7.45247	7.4401	0.877458	0.877458	ATCACAACATACG	ATCACAACATACG	1	1	0	5	0	0	1
1131152	9	149040	9	143160	1	1	NUP159	1725.32	1342.25	26111.5	25052.3	6.93249	11.3052	0	0	AACTAAACAAACG	AACTGAACAAACA	0	0	2	2	0	0	0
1131220	9	148975	9	143092	1	1	NUP159	1409.49	767.985	23065.4	16219.8	7.55507	9.44754	0.882169	0.899452	ATCGTGACCTACG	ATCGCGATATACG	1	1	3	2	0	0	1
1131700	9	142683	9	136612	1	0	PRM5	1116.44	367.646	16644.9	6189.89	9.89418	6.42175	0.601728	0.579733	AGCACTAACTACG	AGCACTAATTACG	1	1	1	1	1	0	0
1138805	9	113453	9	107416	1	0	TAO3	2644.76	582.754	42780	10379.9	10.3477	11.2505	0.899452	0.855456	ATCACTAACCACG	ATCACTAATTACG	1	1	2	6	0	0	1
1138858	9	113408	9	107368	1	1	TAO3	1833.45	907.044	28267.2	15394.1	10.3477	11.2505	0.899452	0.855456	ATCACTAACCACG	ATCACTAATTACG	1	1	2	6	0	0	1
1140901	9	96563	9	90545	1	1	VHS2	2762.44	1713.6	45683.6	27409.9	8.66116	13.3884	0	0	ATGGTCGATCACC	ATGGTAGATCACC	0	0	1	0	0	0	0
1140942	9	96522	9	90504	1	1	VHS2	2393.78	2216.35	36802.1	33908	8.66116	13.3884	0.899452	0.899452	ATCACGTAACACG	ATCACGTAACACG	1	1	0	1	0	0	1
1142106	9	89861	9	83830	1	1	TPM2	1884.29	1587.02	24790.1	23197.1	7.52545	7.1723	0	0	AGTACTATAAACG	AGAAGTAGAAATG	0	0	4	1	0	0	0
1142148	9	89819	9	83788	1	1	TPM2	1434.02	1921.63	22258.6	26785.4	6.70248	7.42488	0.82875	0.912016	GTCATATACTACG	GTCACATACCACG	1	1	2	1	0	0	1
1143521	9	83201	9	77142	1	1	SSL2	1288.24	1309.15	19051.2	18437.5	8.4751	8.4751	0	0	CTCTTTTTTATTG	CTCTTTCTTACTG	0	0	2	1	0	0	0
1143572	9	83151	9	77091	1	1	SSL2	2144.19	1375.35	36423.5	21037	12.1345	12.1345	0.838181	0.838181	ATCGTTAGAAACG	ATCGTTAGAAACG	1	1	0	0	0	0	1
1143862	9	77892	9	71821	1	0	PAN6	905.31	259.186	14298.2	5121.5	8.16642	8.16642	0	0	AACACCAAAAATG	AACACCAAAAATG	0	0	0	3	0	0	0
1143903	9	77856	9	71783	1	0	PAN6	832.188	533.066	12350.2	8918.26	8.16642	8.16642	0.838181	0.816179	ATCATTCCATACG	ATCATTCTATACG	1	1	1	3	0	0	1
1158129	9	375243	9	369435	1	1	DSN1	1606.74	3280.07	25432.7	50520.8	8.16642	12.1345	0	0	ATCATATAGTAAG	ATGGTATATTAAG	0	0	3	2	0	0	0
1158169	9	375283	9	369475	1	1	DSN1	1569.31	3486.03	27042.3	58313.8	8.16642	12.1345	0.794185	0.794185	ATCATTTTAAACG	ATCATTAAAAACG	1	1	2	5	0	0	1
1160464	9	384535	9	378629	0	1	MET28	598.688	2251.21	16874.6	31871.3	9.70093	11.3052	0	0	----TACAACAAG	GTCGTATAACAAG	0	0	5	5	0	0	0
1160520	9	384480	9	378573	1	1	MET28	1478.03	2520.7	19590.6	33307.2	9.80863	9.80863	0.850744	0.838181	GTCTTTTTGCACG	ATCTTTTTGCACG	1	1	1	1	0	0	1
1163454	9	399646	9	395162	1	1	DAL81	2370.73	861.323	38778.5	13818.1	10.7219	10.7219	0	0	ATACTCATAT-AA	ATGTTCACATGAA	0	0	4	2	0	0	0
1163490	9	399682	9	395197	1	1	DAL81	1828.74	1013.8	29145.2	16737.3	10.7219	10.7219	0.899452	0.921446	ATCACCATGTACG	ATCACCCTGTACG	1	1	1	0	0	0	1
1167843	9	415960	9	411485	0	1	DAL3	520.982	718.358	8602.14	10735.6	6.31384	6.31384	0	0	AGCCTTTTAAAAG	AGCCTTTTAAAAG	0	0	0	0	0	0	0
1167895	9	415909	9	411433	0	1	DAL3	657.593	716.865	9927.94	12240	8.83697	9.49276	0.872739	0.850744	GTCATGATCCACG	GTCATAATCCACG	1	1	1	3	0	0	1
1172233	10	432524	10	430337	1	0	SYS1	707.841	179.495	12200	3644.89	7.78372	5.85055	0	0	CT----GGTCACC	CTAACTG----CC	0	0	8	1	0	0	0
1172277	10	432481	10	430293	1	0	SYS1	898.69	525.752	14831.6	8486.34	7.78372	5.36846	0.877458	0	ATCTCTTGTTACG	ACCTCTTGCTACG	1	0	2	1	0	1	0
1172426	10	432337	10	430148	0	1	SYS1	515.55	1058.2	9179.36	16442.7	8.01976	8.76001	0	0	GTAACACTATAGG	GTAACAGCA-AGG	0	0	3	4	0	0	0
1172471	10	432292	10	430104	1	1	SYS1	1531.24	1288.81	25988.4	24651	8.01976	9.06283	0.94344	0.965434	ATCGCGAGCTACG	ATCGCGAGCCACG	1	1	1	2	0	0	1
1175221	10	421833	10	419765	1	1	CCT8	1760.88	3527.04	40187.4	66933.6	7.91454	8.16642	0	0	GTAAATGTGCTCG	GCAAGTGTGCTCT	0	0	3	2	0	0	0
1175268	10	421789	10	419719	1	1	CCT8	691.205	2360.93	14176	35500.2	7.91454	8.16642	0.806756	0.816179	GTCATTATTAACG	ATCATTATCAACG	1	1	2	3	0	0	1
1178776	10	407393	10	406004	1	1	CCT3	2397.81	837.118	37175.5	18293	9.06283	9.06283	0.890021	0.82875	GTCACGTTAAACG	GTCATGTTAAACG	1	1	1	0	0	0	1
1178824	10	407441	10	406052	1	1	CCT3	1336.07	756.806	19891.3	11286.7	7.97921	6.69581	0.890021	0.82875	GTCACGTTAAACG	GTCATGTTAAACG	1	1	1	0	0	0	1
1191174	10	361026	10	366523	0	1	MHP1	609.849	890.219	9882.83	14670.4	8.23388	8.23388	0.978006	0.978006	GTCGCGCAGCACG	GTCGCGCAGCACG	1	1	0	1	0	0	1
1195975	10	342307	10	339340	1	1	MTR4	713.019	1022.05	11198	16521.9	7.91446	5.94118	0	0	TGGGAAC------	TGGGAGCTGTCAA	0	0	7	6	0	0	0
1196005	10	342337	10	339369	0	1	MTR4	534.096	868.042	8202.62	12791.4	7.91446	5.94118	0.860175	0.816179	ATCGTGTTCTACG	ATCATGTTTTACG	1	1	2	0	0	0	1
1196071	10	342402	10	339422	0	1	MTR4	376.052	748.662	5746.21	10394	6.5668	6.70699	0.560879	0.60487	GTATTAATTTACG	GTATTACTTCACG	1	1	2	2	1	0	0
1198106	10	335707	10	332812	1	1	PEP8	3768.38	3676.91	55759.1	58209.6	8.72652	8.11754	0	0	AAAACCACCCAAG	GAAGCCATCCAAG	0	0	3	1	0	0	0
1198146	10	335747	10	332852	1	1	PEP8	2435.58	3904.79	38482.9	60916.9	8.72652	7.90111	0.860175	0.838181	ATCATCATGCACG	ATCATCATTCACG	1	1	1	2	0	0	1
1198697	10	333271	10	330364	1	1	ZAP1	736.657	1796.93	13953.4	29997.1	9.06283	9.06283	0.921446	0.94344	ATCACTGCAGACG	ATCACTGCGCACG	1	1	2	1	0	0	1
1202044	10	316644	10	313730	1	1	MRPL8	1886.29	2169.73	30523.6	34183.5	8.5041	8.5041	0	0	GGCATAAGCAACA	AGTATAAGCAACA	0	0	2	3	0	0	0
1202109	10	316579	10	313665	1	1	MRPL8	1886.12	1889.31	34552.6	35298.7	9.83373	8.23388	0.956012	0.956012	GTCACCGCGTACG	GTCACTGCGCACG	1	1	2	1	0	0	1
1203250	10	312862	10	309971	1	1	UTP18	1438.77	796.134	23456.2	13112.9	8.10111	8.28099	0	0	ATTTTATGTCACC	ATTGTATGTCATA	0	0	3	3	0	0	0
1203295	10	312817	10	309926	1	1	UTP18	1552.93	769.051	22477.3	12593.7	8.37958	8.1643	0.921446	0.921446	ATCACATCCGACG	ATCACACCCTACG	1	1	2	2	0	0	1
1210475	10	262688	10	259705	1	1	GWT1	1131.85	2840.62	17375.7	45129.4	6.79103	7.68371	0	0	GGCGTATGTAAAT	GGTGTATGTAGG-	0	0	4	2	0	0	0
1210517	10	262646	10	259663	0	1	GWT1	354.875	2179.8	6186.81	36144.7	8.28099	10.8161	0.816179	0.860175	ATCATACAAAACG	ATCATGCACAACG	1	1	2	0	0	0	1
1211849	10	256867	10	253869	1	0	SRS2	974.571	603.565	16426.2	11124.3	7.87207	9.78349	0.790259	0.812253	CTCACGATCTACG	CTCACGACCTACG	1	1	1	1	1	0	0
1216631	10	231150	10	228147	0	1	GSM1	165.428	821.508	2999.3	14170.3	7.29213	7.98357	0.623723	0.645719	AGCACAGAGAACG	AGCACGGAGAACG	1	1	1	2	0	0	0
1217280	10	227176	10	224197	1	1	PAM16	1044.6	1553.84	18312.2	24825.2	8.83697	8.28099	0.631579	0.806756	ATCATTTTTCACG	GTCATTTTTTACG	1	1	2	3	0	1	0
1217329	10	227221	10	224244	1	1	PAM16	1295.28	875.079	24279.3	17606.8	6.25295	5.92348	0.816179	0.806756	ATCATTTTTCACG	GTCATTTTTTACG	1	1	2	3	0	0	1
1219927	10	211832	10	208827	1	1	GZF3	1368.32	1145.37	23342.5	19546.4	10.3477	10.3477	0	0	CAATTACGCTACT	CAATTACATAACT	0	0	3	2	0	0	0
1219967	10	211793	10	208789	1	1	GZF3	1916.17	1518.74	35341.4	28775.1	10.3477	10.3477	0.899452	0.899452	ATCACTAGGAACG	ATCACTAGGAACG	1	1	0	1	0	0	1
1220526	10	207738	10	204744	1	0	CCT7	821.578	417.249	13683.2	7013.31	6.69581	6.79103	0.816179	0.860175	ATCATTATTCACG	ATCATTGTCCACG	1	1	2	5	0	0	1
1224759	10	189624	10	193228	0	1	MTC1	514.701	917.495	9278.75	16559.8	6.10031	8.16642	0	0	ATAACTTATGGCG	ATA-CTTATGGCG	0	0	1	3	0	0	0
1224814	10	189569	10	193175	0	1	MTC1	386.577	1115.69	6202.94	19713.1	6.30393	6.77294	0.838181	0.816179	ATCATTCCAAACG	ATCATTTCAAACG	1	1	1	1	0	0	1
1228295	10	173494	10	177137	0	1	URA2	91.244	909.133	1912.9	14388.8	9.06283	8.72652	0	0	TTTTTTTTTAA--	TCTTTCTGAGAAA	0	0	7	9	0	0	0
1231329	10	154928	10	158617	1	1	TIF2	1913.58	1291.2	31998.6	25738.7	10.6124	10.6124	0	0	CAATCATTCAACT	TAATCATTCTACT	0	0	2	1	0	0	0
1231368	10	154889	10	158579	1	1	TIF2	1030.21	788.73	15647.5	12097.2	10.6124	10.6124	0.912016	0.890021	GTCACATCAGACG	GTCACATTAGACG	1	1	1	3	0	0	1
1231442	10	154816	10	158505	1	1	TIF2	755.161	938.071	14095.5	17582.6	5.62659	5.62659	0	0	TTTC-TTTTTTTC	TTTCTTTTTTTTT	0	0	2	0	0	0	0
1232247	10	150768	10	154473	0	1	YAK1	458.978	741.859	7959.79	13082	10.3477	10.8161	0.956012	0.872739	GTCGCGTTGCACG	GTCGTGTTACACG	1	1	2	6	0	0	1
1236655	10	136331	10	140013	0	1	INO1	405.845	747.596	6856.67	11371.7	7.62607	7.62607	0	0	AGAGCTCGTTCCG	AGAGCCCGGACCG	0	0	3	0	0	0	0
1239925	10	120189	10	123821	1	1	PIR5	686.791	782.313	10622.9	12663.6	6.82211	6.82211	0	0	TTAGCTCAAAATG	TTAGCTTAGAATG	0	0	2	0	0	0	0
1240015	10	120100	10	123731	1	0	PIR5	942.444	645.938	15551.8	12360.7	10.3477	9.89418	0.899452	0.912016	ATCACTACAGACG	GTCACTACAGACG	1	1	1	1	0	0	1
1241304	10	116602	10	120210	1	0	JJJ2	3058.67	0	43808.1	0	11.2505	6.25292	0	0	ATCATAGTTTACA	AGCATAGTTTACA	0	0	1	4	0	0	0
1241347	10	116559	10	120202	1	0	JJJ2	2586.62	0	40905.8	0	11.2505	4.52523	0.899452	0	ATCACTCTAGACG	-------------	1	0	13	10	0	1	0
1245070	10	104611	10	107796	0	1	SET2	367.055	854.714	5995.92	12851	9.06283	9.06283	0.877458	0.877458	ATCACCTTTAACG	ATCACCTTTAACG	1	1	0	6	0	0	1
1248163	10	94871	10	98000	1	1	SWI3	1539.14	1426.08	23696.2	26221.3	9.06283	9.06161	0.877458	0.855456	ATCACTTTTGACG	ATCACTTTTAACG	1	1	1	3	0	0	1
1248345	10	94706	10	97835	1	1	SWI3	1559.72	1865.4	23911.4	29723.2	8.54068	8.54068	0.877458	0.877458	ATCACGAATAACG	ATCACGAATAACG	1	1	0	2	0	0	1
1248389	10	94662	10	97791	1	1	SWI3	1786.81	1706.29	30403.9	30450.5	8.54068	8.54068	0.877458	0.877458	ATCACGAATAACG	ATCACGAATAACG	1	1	0	2	0	0	1
1250067	10	83865	10	87024	1	1	MNN11	1014.72	2102.18	22323.9	30241.1	8.16642	10.6124	0	0	AGCGCTAGAGAGT	AGCACTAGATAAT	0	0	3	1	0	0	0
1250120	10	83914	10	87077	1	1	MNN11	1684.02	2485.86	35650.3	48279	9.06161	8.16642	0.877458	0.816179	ATCACTTGTAACG	ATCATTTTTGACG	1	1	3	4	0	0	1
1250382	10	83341	10	86495	1	1	ATG36	1093.15	853.052	15162.5	13894.8	6.68546	5.80753	0	0	CTACCAAT-AATC	CTAACTATGTATT	0	0	5	2	0	0	0
1250585	10	83148	10	86302	1	1	ATG36	926.233	1990.54	16975.5	30089.3	10.3477	10.7219	0	0	TGCTCTAGTGATG	TACTATAGTAATG	0	0	3	5	0	0	0
1250626	10	83110	10	86262	0	1	ATG36	252.13	1064.28	4906	13656.9	8.2127	10.7219	0.838181	0.882169	ATCGTTATACACG	ATCGTCGTACACG	1	1	2	4	0	0	1
1250652	10	83084	10	86236	1	1	ATG36	777.484	982.323	11708.4	14941.9	7.73704	7.73704	0	0	CGTACGATCTACG	CGGATGCTTTACG	0	0	4	1	0	0	0
1256753	10	54240	10	57148	1	1	ECM25	797.684	3574.55	15875.5	69081.4	10.3477	9.43675	0.855456	0.899452	ATCACTATTAACG	ATCACGTTTGACG	1	1	3	5	0	0	1
1256817	10	54301	10	57208	1	1	ECM25	1062.38	2971.71	17109.9	47027.1	6.5668	6.5668	0	0	-CGCCAAAATACG	ACGCCAAAATACG	0	0	1	6	0	0	0
1263208	10	438690	10	436488	1	1	MPP10	932.598	1102.96	15491.6	18425	9.39237	9.39237	0.592302	0.592302	ATAATTCTACACG	ATAATTCTACACG	1	1	0	1	1	0	0
1263262	10	438737	10	436536	1	0	MPP10	726.684	347.046	12222.4	7442.69	6.183	5.92958	0.592302	0.592302	ATAATTCTACACG	ATAATTCTACACG	1	1	0	1	0	0	0
1266175	10	449061	10	446856	1	0	POL31	1346.63	223.253	18982.5	3869.32	11.3052	11.3052	0.816179	0.838181	ATCGTATAACATG	ATCGTATAACACG	1	1	1	3	0	0	1
1268389	10	455177	10	452967	1	0	TDH2	1735.72	138.102	28107.5	2466.84	8.28099	8.28099	0.82875	0.850744	GTCATGAAATACG	GTCATACTCTACG	1	1	4	2	0	0	1
1268437	10	455129	10	452919	1	0	TDH2	991.631	524.259	17156.9	8970.48	7.68371	7.52545	0.82875	0.850744	GTCATGAAATACG	GTCATACTCTACG	1	1	4	2	0	0	1
1272114	10	467169	10	464906	1	1	ESS1	3034.73	1857	44048.7	32884.9	10.9008	9.06283	0.899452	0.899452	ATCACCTTTCACG	ATCACCTTCTACG	1	1	2	3	0	0	1
1272164	10	467119	10	464858	1	1	ESS1	1955.89	1697.76	35227.7	30511.9	10.9008	7.12767	0.899452	0.899452	ATCACCTTTCACG	ATCACCTTCTACG	1	1	2	3	0	0	1
1276072	10	513951	10	500089	1	0	URB2	1230.01	573.646	19285.6	12478.8	9.91254	10.8161	0	0	TTTCTATACAACT	TGTCCATACCACT	0	0	3	5	0	0	0
1276118	10	513906	10	500045	1	0	URB2	1485.28	428.657	27200.6	7089.16	10.1896	9.91254	0.965434	0.965434	ATCGCGCACGACG	ATCGCGCACGACG	1	1	0	1	0	0	1
1278486	10	521921	10	509541	1	0	SSC1	829.981	453.14	12237.8	7386.4	9.06283	9.05234	0.921446	0.877458	ATCACCCACAACG	ATCACTCATTACG	1	1	3	4	0	0	1
1279140	10	525923	10	513660	1	1	ANB1	1566.3	814.453	24487.3	14044.8	5.44652	11.3052	0.838181	0.838181	ATCATATTCGACG	ATCATACTTGACG	1	1	2	2	0	0	1
1279204	10	525859	10	513597	1	0	ANB1	1986.11	402.982	28620	6948.77	8.87506	9.21923	0.838181	0.838181	ATCATATTCGACG	ATCATACTTGACG	1	1	2	2	0	0	1
1285733	10	545346	10	539471	1	1	APS2	725.453	1557.03	12537.6	24082.6	9.80863	8.22048	0	0	GCATTTCTAAACT	GTATCTCTAGACT	0	0	3	0	0	0	0
1285777	10	545303	10	539427	0	1	APS2	278.103	783.571	7108.2	11631.7	9.80863	8.22048	0.838181	0.860175	ATCATTTTGCACG	ATCATTTCGCACG	1	1	1	3	0	0	1
1287847	10	555741	10	549806	1	1	CCT5	2029.78	3524.45	40139	51200.7	10.8161	9.06161	0.877458	0.899452	ATCACTTTACACG	ATCACTTTCCACG	1	1	1	3	0	0	1
1287911	10	555801	10	549866	1	1	CCT5	2082.36	2710.66	31534.9	41840.5	6.82211	7.01038	0	0	GCATA-AATCACT	---TATAATCACT	0	0	4	3	0	0	0
1294817	10	585593	10	579672	0	1	TMH11	480.835	1547.89	9624.84	26901.2	8.09647	6.84016	0	0.592302	ATA-TTTTAGACG	ATAGTTTTAGACG	0	1	1	3	0	0	0
1294868	10	585543	10	579621	1	1	TMH11	726.005	1507.2	11419.9	22432.2	9.00721	9.00721	0.978006	0.592302	GTCGCGCCCTACG	ATCGCCCTCTACG	1	1	3	2	0	1	0
1295180	10	587532	10	581614	1	1	EMC2	3826.9	2743.74	66277.6	45779.4	8.1643	9.43675	0.921446	0.94344	ATCACGCGATACG	ATCACGCGAGACG	1	1	1	3	0	0	1
1295228	10	587484	10	581566	1	1	EMC2	2996.92	2719.72	50737.3	47667.4	9.00721	9.43675	0.921446	0.94344	ATCACGCGATACG	ATCACGCGAGACG	1	1	1	3	0	0	1
1296562	10	604394	10	598522	1	1	FIP1	2283.22	3329.75	33186.8	46284.8	8.28099	8.28099	0	0	GTATTCAATGTCT	GTATTCAATGTCT	0	0	0	0	0	0	0
1296606	10	604350	10	598478	1	1	FIP1	1403.04	2630.97	24742.7	46194.9	8.1643	8.1643	0.921446	0.921446	ATCGCGACATACG	ATCGCGACATACG	1	1	0	2	0	0	1
1307118	10	639157	10	634054	1	1	RSM7	1367.73	1597.4	23065.8	24711.3	7.46334	6.77294	0	0.636292	ACATCGAGCCACG	ATATTAGGCCACG	0	1	4	0	0	0	0
1307167	10	639109	10	634008	1	1	RSM7	1115.3	1099.4	17542.8	16880.4	7.32323	10.1408	0.60487	0.626866	GTAGTTCTATACG	GTAGTTCTACACG	1	1	1	3	1	0	0
1307410	10	640485	10	635335	1	1	TDA4	745.06	1238.65	12061.1	19983	9.49276	9.49276	0	0	CTAATCACATAAT	GTAGTCACATAAT	0	0	2	0	0	0	0
1307465	10	640540	10	635390	0	1	TDA4	512.197	761.628	7685.42	11379.2	7.0594	10.7219	0.872739	0.860175	GTCATCGCATACG	ATCATCGCATACG	1	1	1	1	0	0	1
1308726	10	647191	10	642100	0	1	JHD2	162.202	2473.51	2555	37343.7	8.76515	13.3884	0.921446	0.921446	ATCGCGAATCACG	ATCGCGAAACACG	1	1	1	1	0	0	1
1308819	10	647111	10	642015	0	1	JHD2	291.472	2386.51	5483.55	39008.4	7.0609	7.27776	0	0	CCAGCGCATCACG	------CATCACG	0	0	6	3	0	0	0
1309032	10	646914	10	641817	0	1	JHD2	6.36586	1321.22	144.972	22552.5	9.39237	7.27987	0	0.505106	--AGTCTTGCTTG	CTAGTCTT-----	0	1	7	5	0	0	0
1309088	10	646864	10	641761	0	1	JHD2	2.46146	3164.7	95.6576	49269.9	9.43675	9.43675	0	0.540456	AGTATTATACAC-	AGCATTGTATACG	0	1	4	8	0	0	0
1309125	10	646828	10	641724	0	1	JHD2	23.0868	1304.61	386.747	23593.7	4.89166	8.21919	0	0	TTCT-ATATCACG	TTCTTATATCACG	0	0	1	3	0	0	0
1309168	10	646788	10	641686	0	1	JHD2	55.765	2058.33	1151.12	26924.4	6.0921	6.891	0	0	ATTTTACCCTAGG	ATGTTA----AGG	0	0	5	5	0	0	0
1314018	10	656136	10	651086	1	1	ENT3	3076.54	2070.23	53265.9	36341.9	8.37356	7.68371	0	0	ATATACAAAAAAG	AGGTACAAAATAA	0	0	4	4	0	0	0
1314057	10	656097	10	651047	1	1	ENT3	3049.84	2356.37	52306.2	38193.1	8.37356	7.68371	0.934017	0.934017	GTCACACCGTACG	GTCACCCACTACG	1	1	3	1	0	0	1
1314621	10	663624	10	658509	1	0	RSF2	1065.26	149.425	18375.8	2820.72	10.1408	5.49799	0	0	CTTTTTTTTTTCG	CTTTTTTTTTTC-	0	0	1	2	0	0	0
1314697	10	663549	10	658437	1	0	RSF2	1877.72	150.172	32320.7	2561.88	6.728	5.84089	0.644148	0	GTAACAAACTACG	GTAACAAACCATG	1	0	2	3	0	1	0
1317405	10	684460	10	679428	1	0	MET5	1218.6	431.836	18390.4	7441.81	10.3477	11.2505	0	0	ATAGTAAGTGACA	ATAGTAAGTGACA	0	0	0	5	0	0	0
1317450	10	684417	10	679385	1	1	MET5	2770.21	862.305	42340.9	13645.5	8.08055	8.08055	0	0	ATCACTATCTATG	ATCACTACCAATG	0	0	2	4	0	0	0
1317489	10	684379	10	679346	1	1	MET5	2298.84	826.456	37579.4	14243	6.68629	7.00157	0.838181	0.838181	ATCATTGTGTACG	ATCATTGTGTACG	1	1	0	1	0	0	1
1317860	10	684029	10	678991	0	1	MET5	196.153	729.578	4641.81	12751.8	5.16687	6.09375	0	0	ATTTTGGATGAAT	AGATTGGGTTATT	0	0	5	4	0	0	0
1318046	10	683852	10	678813	1	1	MET5	677.752	2586.11	11335.3	43050.4	10.3477	10.3477	0.855456	0.855456	ATCACTAAATACG	ATCACTAAAAACG	1	1	1	2	0	0	1
1318092	10	683806	10	678769	0	1	MET5	277.382	1919.08	5024.19	28658.8	10.3477	10.3477	0.855456	0.855456	ATCACTAAATACG	ATCACTAAAAACG	1	1	1	2	0	0	1
1318276	10	683651	10	678594	1	1	MET5	769.632	903.739	11792.3	14113.7	6.41913	7.01038	0	0	GACTTTTACTAAG	AAC-TTTGCTGAG	0	0	4	2	0	0	0
1321049	10	703710	10	698659	1	1	HMS2	668.585	979.144	9460.18	14275.7	6.99304	7.42202	0.79497	0	GTCGTTCGGCACG	GTCGTTCGGCACG	1	0	0	2	1	0	0
1321094	10	703755	10	698703	1	1	HMS2	2068.56	1886.08	35164.1	26966.4	6.99304	7.42202	0.79497	0.916735	GTCGTTCGGCACG	GTCGTTCGGCACG	1	1	0	2	0	1	0
1321181	10	703840	10	698788	1	0	HMS2	976.523	225.492	14049.8	3510.99	7.75551	9.80863	0.667714	0	AGCACGTGCGACG	AGCACGTGCAAGG	1	0	2	3	0	1	0
1330472	11	435083	11	456790	1	0	BYE1	984.459	634.958	17432.8	10059.1	11.2505	9.06325	0.899452	0.921446	ATCACTCTTCACG	ATCGCTCTTCACG	1	1	1	6	0	0	1
1332079	11	418189	11	439898	1	1	ARC19	2180.99	2727.66	35850.2	44143.4	8.83697	8.83697	0	0	ATGACATCGCAAT	AGGACATCGCAAT	0	0	1	3	0	0	0
1332130	11	418138	11	439847	1	1	ARC19	2871.68	3272.56	43058.2	42545.2	11.6091	11.6091	0.860175	0.838181	ATCGTTTACCACG	ATCGTTTATCACG	1	1	1	0	0	0	1
1332614	11	417231	11	438949	0	1	URB1	354.536	1461.73	6193.47	20688.2	5.92348	6.95068	0.522388	0.483111	CTAACACAAAACG	CTAATACGAAACG	1	1	2	3	1	1	0
1332790	11	417062	11	438783	0	1	URB1	569.617	2313.1	9363.29	35271.7	9.06283	9.06283	0.899452	0.877458	ATCACTGTAGACG	ATCACTTGAAACG	1	1	3	3	0	0	1
1332841	11	417015	11	438732	0	1	URB1	594.571	968.802	9583	14615.5	7.13264	5.93937	0.899452	0.877458	ATCACTGTAGACG	ATCACTTGAAACG	1	1	3	3	0	0	1
1333157	11	408315	11	430026	1	1	ATP7	857.948	926.302	11509.4	11719.6	12.1345	9.06161	0.806756	0.912016	GTCATTATAAACG	GTCACTGTAGACG	1	1	3	3	0	0	1
1334135	11	402268	11	424005	1	1	SPT23	1135.54	1749.75	16152.4	23961	10.9008	10.9008	0	0	ATAATGCCAGGCC	ATAATGCCAGGCC	0	0	0	1	0	0	0
1334174	11	402229	11	423966	1	1	SPT23	870.977	1115.33	13765.4	17314.7	10.9008	10.9008	0.912016	0.94344	GTCACCTTACACG	ATCACCTCGCACG	1	1	3	3	0	0	1
1335928	11	385645	11	401203	1	1	MAE1	3908.09	4396.42	60131.6	61643.1	10.3477	10.3477	0	0	AAAGCTAATTAAG	AAAGTTAGTTAAG	0	0	2	1	0	0	0
1335969	11	385608	11	401162	1	0	MAE1	5272.8	486.448	85494.3	9036.44	10.3477	10.3477	0.899452	0.877458	ATCACTACACACG	ATCACTATGTACG	1	1	3	2	0	0	1
1336132	11	385449	11	401006	1	1	MAE1	5772.18	900.519	80236.7	26840.1	10.1896	7.25626	0	0.645719	AGGGCAAAGGATG	AGCGCAAAGGACG	0	1	2	3	0	0	0
1336157	11	385429	11	400981	1	1	MAE1	1983.77	4228.1	50115.1	68361.6	11.2505	8.23388	0	0.912016	ATTGTT-GTAATG	GTCGCTAGTAACG	0	1	5	3	0	1	0
1336192	11	385394	11	400946	1	1	MAE1	3006.34	4603.25	55255.1	79601.9	11.2505	8.23388	0.877458	0.934017	ATCACTCTTAACG	GTCACTCCTCACG	1	1	3	4	0	0	1
1336296	11	385290	11	400842	1	1	MAE1	3280.84	2813.07	55050.4	53434.1	8.72652	8.72652	0	0	ATATTGCATCGTG	ATATTGCATCGTG	0	0	0	0	0	0	0
1336332	11	385254	11	400806	1	1	MAE1	3704.25	5105.52	66812.8	92171.3	11.3052	11.3052	0.921446	0.921446	ATCGCCTTGAACG	ATCGCCTTGAACG	1	1	0	3	0	0	1
1337216	11	382457	11	398005	0	1	IXR1	415.181	1142.09	7630.46	19258	6.7025	7.51679	0	0	AACCCAAGCAACT	GATCCAGG----T	0	0	7	2	0	0	0
1337261	11	382412	11	397962	1	0	IXR1	1871.61	344.21	29595.6	5014.09	10.1896	10.1896	0	0	ATGATACCAAATG	ATGATACCAAATA	0	0	1	1	0	0	0
1337297	11	382376	11	397937	1	1	IXR1	976.013	1624.21	15228.5	25827.6	10.1896	10.1896	0.921446	0.899452	ATCGCTAAGCACG	ATCGCTAAGTACG	1	1	1	4	0	0	1
1340006	11	364816	11	380785	0	1	RGT1	521.109	768.666	7870.41	11387.7	9.89418	9.89418	0.912016	0.912016	GTCACTAAGGACG	GTCACTAAGGACG	1	1	0	0	0	0	1
1341201	11	362005	11	377964	1	1	NFU1	955.558	1637.22	18853.4	24276.6	9.06161	10.3477	0.877458	0.877458	ATCACTTGATACG	ATCACTTCATACG	1	1	1	5	0	0	1
1341272	11	361934	11	377893	1	1	NFU1	1196.36	956.69	19185.5	14146.2	11.2505	9.91254	0	0	AATTCGGAAAACT	AATTCGGAAAACT	0	0	0	2	0	0	0
1341788	11	359897	11	375863	1	1	VPS24	1561.04	3968.91	27820.8	51379.2	10.3478	9.21923	0	0	ATAACTATAAATG	ATAGCTA-AAGAG	0	0	4	3	0	0	0
1341827	11	359932	11	375902	1	1	VPS24	1999.47	3056.66	34919.5	54131.6	10.3478	9.21923	0.899452	0.860175	ATCGCTTTTGACG	ATCGTTTTGGACG	1	1	2	4	0	0	1
1346302	11	349342	11	365311	1	1	ELM1	2395.6	2980.38	32905.9	41538.9	9.06161	9.06283	0	0	GGCATCATTTAAT	AGCATCATTTAAT	0	0	1	2	0	0	0
1346349	11	349296	11	365267	1	1	ELM1	1498.48	2468.3	26349.8	37710.3	11.3052	10.8161	0.855456	0.877458	ATCACTTTAAACG	ATCACTTTACACG	1	1	1	4	0	0	1
1348297	11	339083	11	354999	1	1	DEF1	1145.39	1379.98	20194.1	23458.6	11.2505	6.20081	0	0	TTATTATAAGTCG	TTGCTATGAGTCG	0	0	3	0	0	0	0
1348375	11	339005	11	354922	1	1	DEF1	2274.01	2366.86	32956.4	35046.6	9.49027	8.33343	0.834247	0.834247	CTCACCTCCGACG	CTCACCTCCGACG	1	1	0	1	1	0	0
1350977	11	328007	11	343936	0	1	FBA1	262.061	906.749	4777.58	15560.8	7.91454	7.74011	0	0	ATAATGACAGCAG	ATAAT---AGCAG	0	0	3	3	0	0	0
1351048	11	327937	11	343866	0	1	FBA1	431.86	1017.21	6837.95	16880.1	9.87881	10.1408	0.794185	0.794185	ATCATTATTTACG	ATCATTATAAACG	1	1	2	6	0	0	1
1352858	11	322659	11	338517	1	0	YKL063C	694.6	640.37	9911.47	9186.29	10.7219	10.8161	0.626866	0.626866	GTACTGTTGTACG	GTACTGTTGTACG	1	1	0	1	1	0	0
1352926	11	322591	11	338449	1	1	YKL063C	741.835	1105.86	14818.4	17907.8	6.15193	9.89418	0.626866	0.626866	GTACTGTTGTACG	GTACTGTTGTACG	1	1	0	1	0	0	0
1353662	11	321873	11	337728	1	1	YKL063C	923.389	1546.48	12209.5	26653.1	6.29395	6.25957	0	0	CTAAAAACATAAG	TCAAAAACATAAG	0	0	2	1	0	0	0
1353710	11	321825	11	337680	0	1	YKL063C	414.842	1102.21	7252.16	16047.3	11.6091	11.6091	0.626866	0.872739	GTAATTTGGCACG	GTCATTAGGCACG	1	1	2	1	0	1	0
1354093	11	317423	11	333345	0	1	YET1	613.16	1092.28	10590	19310.4	6.57208	6.21393	0	0	ATATTCTGCTGCT	ATACTCTGCTGCT	0	0	1	2	0	0	0
1354281	11	317259	11	333173	0	1	YET1	310.951	1142.95	5014.73	18392.3	9.06283	9.06283	0	0	CGTACTGCTTATG	TATATTGCCTA--	0	0	6	1	0	0	0
1354317	11	317223	11	333137	1	1	YET1	1165.04	1210.08	17880.9	17710.6	9.06283	9.06283	0.899452	0.899452	ATCACAGGATACG	ATCACAGCATACG	1	1	1	0	0	0	1
1358687	11	307127	11	322527	1	1	YKL069W	1451.76	1753.1	21713.9	24914.4	9.00721	9.00721	0	0	TTTCCTCCAAACA	TTTTCTCCAAACA	0	0	1	1	0	0	0
1358733	11	307172	11	322573	1	1	YKL069W	1381.99	1150.92	20532.1	19579	9.39808	9.00721	0.816179	0.877458	ATCCTTTTTAACG	ATCCCTTTTAACG	1	1	1	4	0	0	1
1361342	11	294553	11	308814	1	0	YKL075C	1040.69	587.124	15403.4	9733.89	7.1503	7.1503	0	0.483111	CTAATCTTTAACG	CTAATCTTGAACG	0	1	1	0	1	0	0
1361401	11	294494	11	308757	1	0	YKL075C	1041.67	661.825	14988.5	10647.2	7.42488	7.42488	0.890021	0.912016	GTCACCAAAAACG	GTCACCGAAAACG	1	1	1	1	0	0	1
1368195	11	263186	11	277496	1	0	YJU3	2116.31	298.851	35738.3	5168.77	10.1896	12.1345	0.710133	0.899452	ATCGCTACTTACG	ATCGCTACTTACG	1	1	0	2	0	1	0
1368272	11	263262	11	277573	1	0	YJU3	1138.22	275.373	17611.2	4938.84	7.51298	7.51298	0	0	GCCCCTTCGGACT	GCCCCTTCGGACT	0	0	0	2	0	0	0
1370575	11	256662	11	270973	1	1	UTP11	2870.11	1753.57	48994.5	34478.8	7.81424	7.91454	0.872739	0.82875	GTCGTTATGCACG	GTCATTATGTACG	1	1	2	1	0	0	1
1370622	11	256618	11	270928	1	1	UTP11	1856.33	1914.66	25815.4	30315.2	8.01976	7.91454	0.872739	0.82875	GTCGTTATGCACG	GTCATTATGTACG	1	1	2	1	0	0	1
1377525	11	226383	11	240684	1	1	RAD27	2985.21	4453	48086.9	73303.6	9.00721	9.00721	0.899452	0.899452	ATCCCCATTAACG	ATCCCCATTAACG	1	1	0	1	0	0	1
1377575	11	226333	11	240634	1	1	RAD27	1784.65	2539.57	31337	44003.3	9.06283	9.06283	0	0	AGAACAGGGAAAG	AGAACAGAGGAAG	0	0	2	0	0	0	0
1377615	11	226293	11	240594	1	1	RAD27	1860.27	1395.84	25196	22096.4	7.84015	7.84015	0	0	TTTGCTTGCCACT	TTTGCTTGCCACT	0	0	0	0	0	0	0
1377677	11	226232	11	240533	0	1	RAD27	606.03	4483.6	10478.8	65577.7	12.1345	9.06161	0.890021	0.855456	GTCACTGTTAACG	ATCACTTATAACG	1	1	3	4	0	0	1
1381926	11	210326	11	225216	1	1	SSH4	1738.6	1869.21	28121.3	30327	10.6124	8.36088	0.626866	0.868027	GTCACTTACTACG	GTCACTTATTACG	1	1	1	3	1	1	0
1381971	11	210371	11	225261	1	1	SSH4	1650.92	1538.35	28649.3	28710.9	10.6124	8.36088	0.626866	0.868027	GTCACTTACTACG	GTCACTTATTACG	1	1	1	3	0	1	0
1382842	11	205378	11	220264	1	1	YPK1	1290.27	1375.09	23879.7	22879.1	5.92682	6.37164	0	0	TTGCTGATTGACT	TTACTCATTGAGT	0	0	3	3	0	0	0
1382892	11	205425	11	220309	1	1	YPK1	683.057	995.139	9932.78	15405.1	5.52664	5.52664	0.934017	0.934017	GTCGCGAGTAACG	GTCGCGAGTAACG	1	1	0	0	0	0	1
1385497	11	200362	11	214726	1	0	MYO3	1195.76	540.807	22246.6	9414.2	6.27077	5.51864	0	0	CGATCAGTTTACC	GAATCAGTTTATT	0	0	4	1	0	0	0
1385555	11	200304	11	214668	1	1	MYO3	1730.83	969.398	25563.1	13963.5	7.1723	7.1723	0.912016	0.912016	GTCACAGCAAACG	GTCACAGCAAACG	1	1	0	0	0	0	1
1387692	11	188879	11	203249	1	1	APL2	1384.49	703.494	21756.5	11362.4	8.16642	10.6124	0	0	ATTCTTTTATATA	ATTCCTTTATATA	0	0	1	1	0	0	0
1387736	11	188835	11	203205	1	1	APL2	1558.53	833.644	27636.7	14449.7	8.16642	8.16642	0.838181	0.838181	ATCATTCTGTACG	ATCATTCTGTACG	1	1	0	3	0	0	1
1390059	11	176657	11	191000	0	1	RPC25	494.118	1663.79	8459.85	28869.2	11.3052	11.3052	0	0	ATCGCCTGAATAT	ATCGGCTGAATAG	0	0	2	3	0	0	0
1390103	11	176613	11	190956	0	1	RPC25	524.462	1274.97	11416.4	22177.2	11.3052	11.3052	0.912016	0.912016	GTCGCGTTATACG	GTCGCGTTATACG	1	1	0	2	0	0	1
1390422	11	173982	11	188334	0	1	RPT1	91.1591	878.384	1764.45	13264.2	5.70335	6.63937	0	0	AAAACAAGGTATG	AAA-CAAGACATG	0	0	3	3	0	0	0
1390478	11	174034	11	188390	0	1	RPT1	341.21	1030.84	6518.89	16062.7	8.04121	8.04121	0	0	GCCATACCAAATT	GCCGTACCAAGTG	0	0	3	5	0	0	0
1401024	11	134266	11	146388	1	1	MRP49	1442.33	1589.34	23231.7	25191.5	11.2505	11.2505	0.877458	0.522388	ATCACTTTGAACG	ATCACTTTGAACG	1	1	0	4	0	1	0
1401078	11	134213	11	146334	1	1	MRP49	1327.88	1649.46	18966	22892.4	11.2505	11.2505	0.877458	0.877458	ATCACTTTGAACG	ATCACTTTGAACG	1	1	0	4	0	0	1
1401808	11	130422	11	142540	1	1	MRPL38	1007.63	1242.89	16683.9	17332.6	9.80863	9.80863	0.536528	0.475255	CGCACGTTGCACG	CGCATGTTGCACG	1	1	1	4	1	1	0
1401875	11	130487	11	142603	1	1	MRPL38	700.584	790.289	10271.8	12003	7.81424	7.06681	0	0	AACTCAGAATATT	ATCTCAAAAGATT	0	0	3	5	0	0	0
1402574	11	125600	11	137678	1	1	EBP2	2003.21	1210.22	26572.2	17212.1	10.3477	10.3477	0.855456	0.855456	ATCACTAAATACG	ATCACTAATTACG	1	1	1	4	0	0	1
1402638	11	125659	11	137742	1	0	EBP2	1218.85	271.49	19328.9	4920.03	5.61437	5.61437	0	0	ATAACTACTCATC	GTAATTGCTCATC	0	0	3	3	0	0	0
1403219	11	118651	11	130731	0	1	LST4	582.646	1816.6	9320.34	25281.4	7.98357	7.98357	0	0	ATCATCTCATTTG	ATCATCTCACTTG	0	0	1	1	0	0	0
1403263	11	118607	11	130687	1	1	LST4	923.898	1052.74	13912.1	15926.2	7.98357	7.98357	0.934017	0.934017	GTCACAACCCACG	GTCACAACCCACG	1	1	0	1	0	0	1
1403419	11	118460	11	130541	0	1	LST4	165.13	1081.1	4238.26	14516.7	7.98357	7.98357	0	0	---TTGTAAAACA	ACATTG--AAACA	0	0	5	3	0	0	0
1403468	11	118411	11	130493	0	1	LST4	521.619	963.535	8110.91	12532.5	7.98357	7.98357	0	0	AGTGTGGTGCACG	GATGTGGTGCACG	0	0	2	2	0	0	0
1405224	11	112660	11	124750	1	1	COY1	1792.29	1327.17	31954.3	21479.6	8.16642	8.11754	0.816179	0.816179	ATCATTTGTTACG	ATCATGTTTTACG	1	1	2	0	0	0	1
1405274	11	112610	11	124700	1	1	COY1	1034.28	825.559	18285.4	13042.9	8.16642	8.11754	0.816179	0.816179	ATCATTTGTTACG	ATCATGTTTTACG	1	1	2	0	0	0	1
1406687	11	99667	11	111775	1	0	FAS1	1549.24	428.615	25936.5	7879.23	7.12767	7.1503	0.772976	0	CTCGTCCTCTACG	CTCGT--------	1	0	8	6	0	0	0
1406744	11	99724	11	111816	1	1	FAS1	1632.84	1182.42	26421.5	19814.8	9.44754	9.44754	0.772976	0	CTCGTCCTCTACG	CTCGT--------	1	0	8	6	0	0	0
1406795	11	99775	11	111867	1	1	FAS1	755.967	1115.67	15580.3	21254.7	6.4121	6.4121	0	0	GGCCCTCAAGACA	GGCCCTCAAGACA	0	0	0	1	0	0	0
1406902	11	99882	11	111974	0	1	FAS1	162.499	2237.6	2594.47	35951.5	12.1345	12.1345	0.899452	0.912016	ATCACGATACACG	GTCACGATTCACG	1	1	2	1	0	0	1
1408811	11	93789	11	105930	1	0	MTR2	753.039	54.2511	13423	1123.94	8.21919	5.01411	0.697564	0	ATACCCCCATACG	ATACCCG-ATTTG	1	0	4	1	0	0	0
1409161	11	93482	11	105587	1	1	MTR2	1398.32	707.185	23146.8	9966.2	11.3052	10.8755	0	0	GACTCCCTGTATG	GACTCGTTACATG	0	0	4	2	0	0	0
1409205	11	93438	11	105543	1	1	MTR2	2406.97	1588.75	39666.9	25643.5	11.3052	10.8755	0.816179	0.816179	ATCGTTTTATACG	ATCATTTTGTACG	1	1	2	1	0	0	1
1412815	11	82761	11	94558	1	1	CNB1	1387.67	1156.32	23531.4	20893.6	8.36088	10.8161	0.934017	0.912016	GTCACTTCGCACG	GTCACGTTACACG	1	1	3	4	0	0	1
1412872	11	82818	11	94613	1	0	CNB1	782.746	654.384	14091.1	11573.3	10.3477	5.34409	0	0	GGCCTTCCACGCG	GGACTTCGAT-CG	0	0	4	0	0	0	0
1413197	11	80880	11	92682	1	0	ACP1	797.77	298.255	12583.4	5816.67	4.99487	6.99304	0	0.666143	GTA-CATATA-AA	GTAGCA---AGAA	0	1	5	1	0	0	0
1413398	11	80686	11	92490	1	0	ACP1	1008.52	533.385	15919.8	9569.49	9.06283	8.5041	0.899452	0.899452	ATCACTGTTGACG	ATCACTGTTGACG	1	1	0	4	0	0	1
1414335	11	75709	11	87549	1	1	YKT6	1571.82	2091.83	20814.9	28177.4	8.4751	8.4751	0	0	ATGTTTTTAAACC	ACG-TTTTAAACC	0	0	2	3	0	0	0
1414382	11	75662	11	87502	1	1	YKT6	882.945	1968.65	16745.5	33156.6	6.68629	6.68629	0.860175	0.860175	ATCGTTCTGTACG	ATCGTTCTGTACG	1	1	0	0	0	0	1
1417970	11	53544	11	59808	1	1	EAP1	1858.19	1349.82	29776.5	24295.7	11.3052	7.91454	0	0	ATAATAGATAAAG	ATAATGGATAAAG	0	0	1	5	0	0	0
1418010	11	53584	11	59848	1	1	EAP1	1564.81	1503.6	22603.9	21390.1	7.06681	7.91454	0.82875	0.806756	GTCATTCTTTACG	GTCATTATTTACG	1	1	1	2	0	0	1
1418556	11	48038	11	54302	1	1	EMC3	3857.41	1997.27	63381.1	32476.3	7.59425	9.89418	0	0	ATATATGGATATG	ATATTTGGATATG	0	0	1	2	0	0	0
1418611	11	48088	11	54353	1	1	EMC3	3752.55	2154.14	56407.7	31978.4	7.69029	9.39808	0.768264	0.790259	CTCACTAAGAACG	CTCACTACGAACG	1	1	1	4	1	0	0
1420412	11	39046	11	45277	1	1	TRP3	1334.71	1121.77	22131.2	18343.4	7.46334	7.22498	0	0	ATCCTACTTAAAG	ATCCTACTTAATG	0	0	1	0	0	0	0
1420463	11	38995	11	45226	1	1	TRP3	1085.51	1452.33	20463.1	21674.1	9.39237	10.9008	0.912016	0.850744	GTCACACTACACG	GTCATGATACACG	1	1	3	2	0	0	1
1420941	11	38529	11	44779	1	1	TRP3	1298.68	851.3	22278.4	15318.9	6.95068	6.5668	0	0	CGTATTTTTCACT	CACATTTTTCACT	0	0	2	2	0	0	0
1421135	11	38339	11	44597	1	1	TRP3	939.176	1824.43	14903.3	32448.4	9.49027	9.49027	0	0	CTATCTCTTCTGG	CCATATCCCCTGG	0	0	4	6	0	0	0
1421170	11	38309	11	44562	1	1	TRP3	1251.91	1505.17	23013.3	26960.8	9.49027	11.2505	0.921446	0.921446	ATCACTGACGACG	ATCACTGACGACG	1	1	0	4	0	0	1
1430394	11	452041	11	473690	1	1	RSC4	1293.67	2535.18	23047.3	40472.5	7.01557	7.01557	0	0	AGCTTGTATACCA	TAAATATATATTA	0	0	7	2	0	0	0
1430439	11	452084	11	473734	1	1	RSC4	1546.95	2475.81	25255	36133.9	8.37958	8.37958	0.877458	0.877458	ATCACATTTGACG	ATCACATTTGACG	1	1	0	2	0	0	1
1432640	11	461489	11	483326	1	1	TOF2	3953.33	1041.18	62564.4	20067.2	8.54068	7.35254	0	0	ATTTCTATAAATG	ACTTTTATAA-TA	0	0	4	3	0	0	0
1432690	11	461442	11	483277	1	1	TOF2	3526.47	1008.32	53133	15957	11.3052	11.3052	0.890021	0.890021	GTCGCATTATACG	GTCGCATTATACG	1	1	0	1	0	0	1
1434662	11	466325	11	488158	1	1	YPT52	2349.72	1287.46	40241.7	21406.3	6.9455	10.3478	0.956012	0.934017	GTCGCTGTCCACG	GTCACTGTCCACG	1	1	1	2	0	0	1
1434712	11	466278	11	488108	1	1	YPT52	1545.42	992.346	26166.7	17274.5	7.51298	7.59425	0.956012	0.934017	GTCGCTGTCCACG	GTCACTGTCCACG	1	1	1	2	0	0	1
1435041	11	469540	11	491364	1	1	YKR015C	1164.78	760.027	17258.1	13483.8	9.06161	11.6091	0.877458	0.899452	ATCACTTTAGACG	ATCACTTTCGACG	1	1	1	5	0	0	1
1435085	11	469498	11	491322	1	1	YKR015C	1267.61	1141.86	20233.7	19780.6	9.06161	11.6091	0.877458	0.899452	ATCACTTTAGACG	ATCACTTTCGACG	1	1	1	5	0	0	1
1439902	11	500154	11	521802	1	1	SET3	4752.75	3902.2	83073.3	65663.8	11.2505	11.2505	0.899452	0.890021	ATCACTTCCAACG	GTCACTTCTAACG	1	1	2	3	0	0	1
1440090	11	499968	11	521617	1	1	SET3	12338.8	7330.45	189676	122004	9.76467	9.00721	0	0	AAATTGTTCAACC	AAATTGTTCAACT	0	0	1	3	0	0	0
1440132	11	499927	11	521575	1	1	SET3	8909.02	6914.98	112108	101464	9.76467	9.00721	0.816179	0.794185	ATCATTATCAACG	ATCATTATTAACG	1	1	1	3	0	0	1
1440611	11	506615	11	528266	1	1	SPO14	1762.88	1799.46	30646	28854.5	10.3477	10.3478	0.728987	0.728987	GTCGTTGATAACG	GTCGTTGATAACG	1	1	0	0	1	0	0
1440658	11	506568	11	528219	1	1	SPO14	1589.94	1121.64	26776.8	19810.1	8.26826	8.26826	0.728987	0.728987	GTCGTTGATAACG	GTCGTTGATAACG	1	1	0	0	0	0	0
1441984	11	514631	11	536426	0	1	KAE1	493.439	1348.86	6881.32	19597.7	7.85522	6.95131	0	0	CTCATGCAGCAAA	----TGCAGCTAA	0	0	5	6	0	0	0
1442015	11	514600	11	536395	0	1	KAE1	302.803	1419.62	5291.64	21629.2	7.85522	7.89421	0	0	CTGCCTGATAGCG	CTGCCTGATAGCG	0	0	0	2	0	0	0
1442055	11	514560	11	536377	1	0	KAE1	800.528	0	12226.1	0	9.06283	7.89421	0	0.890021	AGGAAATGGTATA	AGGGACGG-----	0	1	8	6	0	1	0
1442093	11	514524	11	536357	1	1	KAE1	1019.09	3231.23	16147.3	46964.5	9.06325	9.06325	0.877458	0.890021	AGGAAATGGTATA	AGGGACGG-----	1	1	8	6	0	0	1
1443640	11	513313	11	534971	1	1	KAE1	812.029	686.031	13391.9	11091.4	11.3052	8.13395	0.877458	0.816179	ATCGCTTTATACG	AT---TTCATACG	1	1	4	5	0	0	1
1443689	11	513270	11	534931	1	0	KAE1	829.174	147.932	14028.9	5365.12	11.3052	7.45247	0.877458	0.816179	ATCGCTTTATACG	AT---TTCATACG	1	1	4	5	0	0	1
1446656	11	525220	11	546653	1	1	PLN1	1872.62	1347.24	27924.1	21717.1	8.16642	7.1723	0	0	--TCT-----TAG	CATCTACATCTAC	0	0	8	2	0	0	0
1446707	11	525169	11	546605	1	1	PLN1	1644.6	1054.53	27838.2	16827.1	7.3221	7.3221	0.904163	0.904163	ATCATCCCCCACG	ATCATCCCCCACG	1	1	0	0	0	0	1
1449575	11	548111	11	569461	1	1	DYN1	1746.2	1882.01	30416.3	33105.9	7.81424	7.81424	0	0	ATGTCTTTTGTCG	GTGTCTTGTGTCG	0	0	2	2	0	0	0
1449637	11	548049	11	569399	1	1	DYN1	2537.39	2390.98	39907.9	38129.8	10.8755	11.3052	0.912016	0.890021	GTCGCATTGTACG	GTCGCATTATACG	1	1	1	3	0	0	1
1451180	11	551504	11	572855	1	0	RPS21A	1081.22	652.103	17909.4	13787.8	9.06283	10.8161	0.899452	0.877458	ATCACTCTACACG	ATCACTTTACACG	1	1	1	4	0	0	1
1451232	11	551556	11	572907	1	1	RPS21A	693.285	946.498	13810.9	16331.4	9.06283	9.06283	0.899452	0.877458	ATCACTCTACACG	ATCACTTTACACG	1	1	1	4	0	0	1
1451552	11	552389	11	573738	0	1	GLG1	114.586	1158.64	1799.16	22308	5.50845	7.13264	0	0.582875	GTATTTTTAGACA	GTATTTTTAGACG	0	1	1	1	0	1	0
1451603	11	552440	11	573789	0	1	GLG1	53.4732	1110.34	1174.97	17667.3	6.42175	9.7757	0	0.582875	GTATTTTTAGACA	GTATTTTTAGACG	0	1	1	1	0	0	0
1452026	11	554770	11	576090	1	1	TIF1	1162.45	1370.68	19036	21534	9.89418	9.89418	0.868027	0.868027	GTCACTATAAACG	GTCACTATAAACG	1	1	0	0	0	0	1
1452093	11	554836	11	576157	1	1	TIF1	1507.18	1427.06	20606.9	19736	12.1345	12.1345	0	0	TTTTTCAGTCACT	ATTTTCAGTCACT	0	0	1	0	0	0	0
1454331	11	566042	11	587422	1	1	PAM17	2336.31	1289.53	37083.6	23603.5	8.11754	8.11754	0	0	GTATTATTTATCT	GTACTATTTATCT	0	0	1	2	0	0	0
1454380	11	565993	11	587373	1	1	PAM17	2103.28	1648.8	34078.9	24603.7	10.8755	8.11754	0.816179	0.816179	ATCATCTAATACG	ATCATCTAATACG	1	1	0	2	0	0	1
1457604	11	578427	11	599810	1	1	SIS2	1877.8	2533.85	29891.3	41227.2	10.9008	10.9008	0	0	CTCATGTTAAAAG	CTCATGCTTAGGG	0	0	4	0	0	0	0
1457656	11	578375	11	599758	1	1	SIS2	1467.88	1583.77	26728.1	28993.5	10.9008	10.9008	0.956012	0.956012	GTCACTGCCCACG	GTCACTGCCCACG	1	1	0	0	0	0	1
1459825	11	581395	11	602770	0	1	YKR075C	488.007	1100.51	7198.22	18242.1	7.51679	6.99304	0.794185	0.794185	ATCATTATAAACG	ATCATTTTAAACG	1	1	1	3	0	0	1
1459873	11	581347	11	602722	0	1	YKR075C	117.514	937.987	1614.51	14158.2	7.51679	6.99304	0.794185	0.794185	ATCATTATAAACG	ATCATTTTAAACG	1	1	1	3	0	0	1
1462202	11	592716	11	613933	1	1	RPF2	1399.89	798.542	23767.7	17294.3	11.3052	10.8161	0.816179	0.860175	ATCGTTTTATACG	ATCGTCTTACACG	1	1	2	2	0	0	1
1462276	11	592644	11	613860	1	1	RPF2	1378.89	1068.69	18535.1	13955.1	7.75551	7.75551	0	0	CGATTTGAAAATT	CGGTTTGAAAATT	0	0	1	1	0	0	0
1462786	11	599041	11	620255	1	1	HBS1	1768.52	1218.61	26716.4	18021.2	10.8161	10.8161	0.899452	0.899452	ATCACAATGCACG	ATCACAATGCACG	1	1	0	3	0	0	1
1462832	11	598997	11	620209	1	1	HBS1	1458.93	1049.1	20313.8	14798.7	7.98357	7.39139	0.899452	0.899452	ATCACAATGCACG	ATCACAATGCACG	1	1	0	3	0	0	1
1480013	12	111760	12	107333	1	1	DPS1	1855.44	2364.18	31164.3	44584	10.6124	10.6124	0	0	GTTCTTATGGATG	GTTCCCATGGATG	0	0	2	2	0	0	0
1480053	12	111720	12	107293	1	1	DPS1	1555.65	2132.37	20227.5	27913.1	10.6124	10.6124	0.860175	0.860175	ATCATCAGTGACG	ATCATCAGTGACG	1	1	0	0	0	0	1
1480992	12	99008	12	94444	0	1	POM33	634.252	683.581	9735.78	11142.8	6.81411	6.69647	0	0	TT-ACACAAAACT	TTTACACAAAACT	0	0	1	1	0	0	0
1485480	12	84377	12	79889	1	0	TPO1	767.68	96.4323	11124.6	1233.34	9.70093	9.70093	0.527101	0	CTACTGTGAGACG	CTACTGTGAGGCG	1	0	1	1	1	1	0
1485576	12	84472	12	79985	1	0	TPO1	763.733	135.116	12044.7	2160.92	6.74158	5.87358	0	0	AACTCCCGATACG	AACCCCCGATACG	0	0	1	0	0	0	0
1488819	12	73340	12	68884	1	1	RIX7	867.497	670.078	12600.6	9458.78	8.11754	6.25357	0	0	AGTATATCATACG	AGCAT--CATATT	0	0	5	3	0	0	0
1490666	12	54160	12	49704	1	1	SDH2	1154.89	666.689	19844.8	11704.3	7.3221	7.3221	0.732128	0.732128	GTAGCTCCGCACG	GTAGCTCCGCACG	1	1	0	1	1	0	0
1494437	12	46567	12	41944	1	1	YBT1	889.947	1109.53	12016.2	16682.5	7.68371	7.68371	0	0	ATCCTCCTTTATT	ATCCTCCTTTATT	0	0	0	2	0	0	0
1494481	12	46523	12	41902	1	1	YBT1	1169.28	1141.41	16079.8	16240.1	7.68371	7.68371	0.912016	0.912016	GTCACAACGTACG	GTCACAACGTACG	1	1	0	0	0	0	1
1503630	12	187551	12	183729	1	1	IZH3	826.925	1357.92	12596.1	19615.6	7.51679	8.23388	0.956012	0.956012	GTCCCTTCCCACG	GTCCCTTCCCACG	1	1	0	2	0	0	1
1503738	12	187443	12	183623	1	1	IZH3	682.929	1084.53	10086.5	15780	9.44754	9.44754	0	0	AGTGTGGGGTATG	GGTGTGGGGTGTG	0	0	2	0	0	0	0
1504140	12	194300	12	190473	1	1	UBR2	1757.49	1169.64	27922.4	21347.5	11.3052	10.8161	0	0	ATTTTTAAATAAG	ATTTTTAAATAAG	0	0	0	1	0	0	0
1504180	12	194263	12	190435	1	1	UBR2	2204.58	1215.64	33902.8	21588.4	11.3052	10.8161	0.794185	0.82875	ATCATTTTATACG	-TCATTTTACACG	1	1	2	5	0	0	1
1504361	12	194088	12	190261	1	0	UBR2	668.5	235.046	10927.3	4735.38	6.26389	10.1896	0	0	GTCATCCTATAAT	ATCAATCTTGAAT	0	0	5	5	0	0	0
1504892	12	193594	12	189751	1	0	UBR2	697.189	497.813	11436.4	7719.04	9.43675	9.06161	0.877458	0.899452	ATCACTTATCACG	ATCACTTACCACG	1	1	1	3	0	0	1
1506833	12	198214	12	194371	1	1	AAT2	1231.96	1468.49	17025	19267.4	11.6091	11.6091	0	0	CTCTCGGCGATCG	GTCTCGCAGATCG	0	0	3	2	0	0	0
1506872	12	198175	12	194332	1	1	AAT2	1674.18	2179.22	27214.3	33967.8	11.6091	11.6091	0.956012	0.956012	GTCGCCTTGCACG	GTCGCCTTGCACG	1	1	0	2	0	0	1
1508728	12	203064	12	199227	1	0	RPL15A	702.451	82.1231	9656.2	2284.13	5.67025	6.83074	0	0	ATTGTTAAACACT	ATTATTAGACACT	0	0	2	2	0	0	0
1508918	12	202877	12	199041	1	0	RPL15A	1131.55	477.96	17019.9	6955.93	8.28099	12.1345	0.838181	0.838181	ATCATGTTTGACG	ATCATGTTAGACG	1	1	1	4	0	0	1
1518799	12	232188	12	222510	1	1	TRX1	1439.62	1401.66	21753.8	22558.5	8.83697	8.83697	0.838181	0.838181	ATCTTTTCCAACG	ATCTTTTCCAACG	1	1	0	1	0	0	1
1518861	12	232134	12	222448	1	0	TRX1	709.751	320.624	11468.3	6289.79	5.14225	4.94201	0	0	GTCTTCCAAAAAA	GTCTTCCAAAAAA	0	0	0	1	0	0	0
1520172	12	237928	12	228236	1	1	STU2	1908.95	1331.8	27861.3	19283.9	6.79103	6.79103	0.838181	0.816179	ATCATGGTTAACG	ATCATAGTTTACG	1	1	2	3	0	0	1
1520576	12	239258	12	229573	1	0	YLR046C	1121.54	80.6723	17927.4	1445.96	10.7219	6.29847	0	0	ATGGTGGCATATC	ATGGT---ATATC	0	0	3	1	0	0	0
1520611	12	239225	12	229539	1	0	YLR046C	1187.91	67.8139	18675.4	1159.81	10.7219	9.91254	0.636292	0	GGCCCTATGTACG	GGCCCTAACTGCG	1	0	3	0	1	1	0
1520950	12	242112	12	232411	1	1	FRE8	967.865	962.235	16125.1	15721.1	8.76001	8.76001	0	0	CTCGTATTGAAAA	CTCGTATTGAAAA	0	0	0	1	0	0	0
1520992	12	242070	12	232369	1	1	FRE8	1296.43	1127.38	19591.9	16554.3	8.76001	9.70093	0	0.484682	GTTCCCTACCACG	GTTCCCTGCCACG	0	1	1	0	1	0	0
1522896	12	253409	12	243725	1	1	SPT8	1201.45	1355.02	22598.9	25426.1	9.49276	10.08	0.916735	0.916735	GTCGTGCCACACG	GTCGTGCCACACG	1	1	0	4	0	0	1
1522937	12	253368	12	243684	1	1	SPT8	1007.8	1303.39	15806	21363.5	9.49276	9.49276	0.899452	0.899452	ATCGCAAGTTACG	ATCGCAAGTTACG	1	1	0	0	0	0	1
1523000	12	253307	12	243625	0	1	SPT8	489.747	1192.44	8670	20402.3	8.16642	7.75551	0	0	ATACGAAAAAACC	--ACGAAAAAACC	0	0	2	2	0	0	0
1524210	12	260844	12	251149	1	0	REX2	840.039	367.26	12849.6	8601.63	12.1345	12.1345	0	0	ATTTCCTTCAATT	ATTTCCTTCAATT	0	0	0	1	0	0	0
1524254	12	260801	12	251105	1	1	REX2	1060.72	777.28	17029.8	13144.1	12.1345	12.1345	0.921446	0.899452	ATCACGACACACG	ATCACAACACACG	1	1	1	1	0	0	1
1524421	12	260636	12	250941	1	0	REX2	746.418	365.792	12942.3	6826.18	5.05484	5.05484	0	0	GTTTCTTTTT-CC	GTTTCTTTTTCCC	0	0	1	2	0	0	0
1527832	12	278772	12	269091	1	1	RGR1	1943.07	2248.31	32111.1	35942.1	8.22048	8.22048	0	0	ATGCCACTAAATT	ATGCCACTAAATT	0	0	0	2	0	0	0
1527876	12	278728	12	269047	1	1	RGR1	1030.42	1224.3	17091.3	18266.2	8.22048	8.22048	0.956012	0.956012	GTCCCATCGCACG	GTCCCATCGCACG	1	1	0	1	0	0	1
1532556	12	302130	12	292397	0	1	ARP6	406.312	1279.26	8203.34	21509.7	8.54068	8.01976	0	0	-ACACTGGAATCG	CACACCGGAATCG	0	0	2	1	0	0	0
1532578	12	302111	12	292375	1	1	ARP6	745.145	1123.01	12669.5	19390.9	8.54068	8.01976	0	0	ATAATGTAAACCT	ATGATGTATATCG	0	0	4	2	0	0	0
1532622	12	302068	12	292332	1	1	ARP6	699.014	2311.42	11274.1	32556.3	7.03474	6.29847	0.60487	0.60487	GTAATTATGGACG	GTAATTCTGAACG	1	1	2	2	1	0	0
1534975	12	332304	12	322555	1	1	IOC2	2200.21	2452.44	40050.3	44940.5	7.71295	13.3884	0.94344	0.94344	ATCACCGCACACG	ATCACCGCACACG	1	1	0	3	0	0	1
1535043	12	332236	12	322487	1	1	IOC2	1734.02	2014.95	28075.3	31869.6	9.89418	8.36088	0.890021	0.890021	GTCACTTTTGACG	GTCACTTTTGACG	1	1	0	3	0	0	1
1538682	12	364010	12	354243	0	1	REA1	647.79	940.099	11933.4	16680.9	12.1345	12.1345	0.934017	0.934017	GTCGCCCTTTACG	GTCGCCCTTTACG	1	1	0	1	0	0	1
1538764	12	363928	12	354164	0	1	REA1	425.876	745.784	6706.39	10569.3	9.06283	9.06283	0	0	AAAATTTTTCACT	AAAATTTTTCACT	0	0	0	1	0	0	0
1541572	12	380670	12	371706	1	1	MSL5	2434.05	2673.64	38655.5	42833.1	9.00721	9.00721	0	0	ACAGCAATTTATG	ATGGCAATTTATG	0	0	2	1	0	0	0
1541612	12	380710	12	371746	1	1	MSL5	1830.35	779.393	29660.1	12665.3	9.00721	9.00721	0.746269	0.746269	CTCACTTTTAACG	CTCACTATTAACG	1	1	1	1	1	0	0
1541875	12	384672	12	375709	1	1	CLF1	1520.08	4112.99	20892	60764.7	7.58443	10.7476	0.921446	0.536528	ATCGCGTCTTACG	GTCGCGTCTTACG	1	1	1	2	0	1	0
1541923	12	384624	12	375661	1	1	CLF1	1510.96	4189.33	24579.5	71340.7	7.58443	7.05378	0.921446	0.536528	ATCGCGTCTTACG	GTCGCGTCTTACG	1	1	1	2	0	1	0
1543883	12	390756	12	381784	0	1	YPS3	383.479	764.102	7324.09	13118.1	7.03474	8.16642	0.899452	0.794185	ATCCCTTATGACG	ATCATTTATAACG	1	1	3	2	0	0	1
1546749	12	404422	12	395718	1	1	ZRT2	829.132	1439.21	12257.6	21440.8	6.74326	7.08628	0	0	TTATTTC-TTTAC	TTATTTCTTTTAT	0	0	2	0	0	0	0
1546809	12	404362	12	395658	1	0	ZRT2	962.9	485.701	17382.5	11902.2	7.35254	8.11754	0.890021	0.838181	GTCCCTATAAACG	ATCATCATGAACG	1	1	5	1	0	0	1
1554284	12	447708	12	439110	0	1	ACS2	535.581	670.548	8262.54	9682.32	8.83697	8.83697	0.965434	0.965434	ATCGCACCGCACG	ATCGCACCGCACG	1	1	0	0	0	0	1
1556349	12	493411	12	464331	1	1	MAS1	734.875	2620.44	17674.1	38443.5	8.16843	7.91454	0.855456	0.855456	ATCACTAAATACG	ATCACTATATACG	1	1	1	3	0	0	1
1556408	12	493353	12	464272	1	1	MAS1	1173.02	2676.74	21215.3	40679.2	10.3477	11.3052	0.855456	0.855456	ATCACTAAATACG	ATCACTATATACG	1	1	1	3	0	0	1
1558824	12	504207	12	475313	0	1	IDP2	282.517	939.395	3955.96	14384.1	7.44017	7.0915	0	0	CGATCAAATAAAG	CAATCAAATAAAG	0	0	1	2	0	0	0
1558877	12	504260	12	475366	0	1	IDP2	609.425	800.547	9162.47	12268.7	8.28099	8.28099	0	0	GTCACCCTCTCCG	GTCACCCTCTCCG	0	0	0	2	0	0	0
1559104	12	505893	12	477015	1	1	CBF5	1154.55	865.634	19950.3	15013.5	7.22164	6.43121	0	0	AT-TATATATT--	ATATATATATTCT	0	0	3	5	0	0	0
1559147	12	505935	12	477058	1	1	CBF5	1099.85	720.386	17721.5	12139.4	6.15193	6.43121	0.816179	0.794185	ATCATATGTTACG	ATCATATTTTACG	1	1	1	2	0	0	1
1563290	12	523451	12	494665	1	0	EMG1	860.876	298.381	16263.4	4446.26	7.11491	8.54068	0.82875	0.877458	GTCATGAATTACG	ATCACGAATTACG	1	1	2	1	0	0	1
1563346	12	523507	12	494721	1	0	EMG1	1106.26	320.432	19006.2	5325.49	6.5668	8.54068	0.82875	0.877458	GTCATGAATTACG	ATCACGAATTACG	1	1	2	1	0	0	1
1565818	12	539814	12	510957	0	1	HCR1	553.278	1026.17	8643.39	15949.7	9.89418	9.89418	0.816179	0.912016	ATCATATTAGACG	GTCACATCAGACG	1	1	3	1	0	0	1
1565893	12	539741	12	510882	0	1	HCR1	268.13	707.034	4151.05	12641.1	6.06797	6.82854	0	0	ATGCCCAAAAACA	ATGTTCAAAAACA	0	0	2	0	0	0	0
1567458	12	543400	12	514538	1	0	NMT1	884.685	486.002	16035.1	7938.28	9.80863	8.11754	0.860175	0.860175	ATCATGAGCAACG	ATCATGAGCAACG	1	1	0	1	0	0	1
1567820	12	545867	12	517023	0	1	NOP56	333.401	1380.31	5590.5	20861.2	9.06283	9.06283	0	0	GTCATCATATGCT	GTTGTCATATGCT	0	0	2	4	0	0	0
1567888	12	545934	12	517090	0	1	NOP56	120.612	1129.68	2261.2	20966.7	7.16361	7.12767	0.899452	0.921446	ATCGCATTCTACG	ATCGCTCTCTACG	1	1	2	1	0	0	1
1568671	12	552174	12	523334	1	1	MSS51	960.014	977.76	15521.8	16407.1	7.45738	7.45738	0.882169	0.860175	ATCATGCGCTACG	ATCATGCACTACG	1	1	1	0	0	0	1
1568724	12	552121	12	523282	0	1	MSS51	647.408	725.93	9819.34	10890.3	6.79103	6.79103	0.882169	0.860175	ATCATGCGCTACG	ATCATGCACTACG	1	1	1	0	0	0	1
1576172	12	581914	12	553163	1	1	UTP13	1378	1471.99	19438.9	22011.5	10.8161	10.8161	0.912016	0.850744	GTCGCTTTACACG	GTCGTTTTACACG	1	1	1	1	0	0	1
1576243	12	581843	12	553092	1	1	UTP13	991.674	1224.45	16557	19764.1	7.42644	6.9371	0	0	ATTTTCTGAAAAA	ATTTTCTGAAAAA	0	0	0	0	0	0	0
1577609	12	586010	12	557240	1	0	UCC1	669.561	139.998	11940.6	2618.26	11.3052	6.99334	0.855456	0.855456	ATCTCTTTATACG	ATCTCTTTTTACG	1	1	1	2	0	0	1
1581854	12	605550	12	570170	1	1	CDC42	889.905	879.642	14059.8	12665.8	6.72492	7.73473	0.626866	0.626866	GTACTGTTGAACG	GTACTGTTTGACG	1	1	2	3	1	0	0
1583391	12	611921	12	576564	0	1	THI7	27.5005	752.135	515.804	13171.8	7.67777	10.8161	0	0.614297	ATATTCACGCGCG	ATAATCACTCACG	0	1	3	1	1	1	0
1587299	12	636403	12	601708	0	1	YEF3	229.935	890.219	4222.86	13889.3	7.84015	6.45326	0	0	ATCATGACAGGCT	ATCATGACGGGCT	0	0	1	1	0	0	0
1587401	12	636504	12	601807	1	1	YEF3	667.651	1393.45	10676.2	23545	11.2505	11.2505	0.899452	0.899452	ATCACTTAGCACG	ATCACTTAGCACG	1	1	0	0	0	0	1
1589728	12	645220	12	610483	1	0	NDL1	1014.68	614.719	16304.1	12084.8	8.11754	9.70093	0	0	CTTTTTTCTTCCT	CATTCTTTTTCCT	0	0	3	0	0	0	0
1589779	12	645169	12	610441	1	0	NDL1	1198.9	194.358	16939.4	3195.04	8.11754	8.16642	0.860175	0.816179	ATCATCTGTGACG	ATCATTTGTAACG	1	1	2	4	0	0	1
1591352	12	658331	12	617391	1	1	YLR257W	1691.66	1783.66	32721.6	32674.2	10.3477	10.3477	0.899452	0.899452	ATCACTAGAGACG	ATCACTAGAGACG	1	1	0	1	0	0	1
1593205	12	665248	12	624338	0	1	HSP60	407.755	753.525	6055.84	10930.5	8.28099	7.45247	0.82875	0.82875	GTCATCATATACG	GTCATTTCATACG	1	1	3	3	0	0	1
1594300	12	672938	12	632007	0	1	RPS28B	285.106	687.65	5112.68	11188.2	10.8755	11.3052	0.816179	0.794185	ATCATTTTGTACG	ATCATTTTATACG	1	1	1	3	0	0	1
1599335	12	697081	12	656399	1	1	DBP9	1866.64	1065.51	28687.5	15722.6	8.5041	8.5041	0	0	TTAGAA------C	GT-GAAGATAACC	0	0	8	6	0	0	0
1599372	12	697045	12	656362	1	0	DBP9	2106.8	614.292	41571.8	11106.2	8.5041	8.5041	0.877458	0.877458	ATCACTCTTTACG	ATCACTCTTTACG	1	1	0	2	0	0	1
1600614	12	704642	12	663908	1	1	YLR278C	2175.77	1236.07	28039.1	15962.9	9.49276	8.22048	0.498036	0.965434	ATCGTGTCGTACG	ATCGCGTCGCACG	1	1	2	3	0	1	0
1600694	12	704562	12	663828	1	1	YLR278C	1208.37	678.223	19307.5	11733.3	9.83373	9.83373	0.670856	0.921446	GTCGCGAAGTACG	ATCGCGAAGTACG	1	1	1	1	0	1	0
1605524	12	720518	12	679757	1	1	SEC72	1078.55	1817.5	20255.2	24020.7	7.87207	10.8161	0	0	CAAGCCAAATACG	-------AATACG	0	0	7	4	0	0	0
1605566	12	720478	12	679715	1	1	SEC72	1110.08	1479.41	16639.3	21406.8	6.74158	10.1408	0.838181	0.838181	ATCGTTTCAAACG	ATCGTTTCAAACG	1	1	0	2	0	0	1
1605776	12	721693	12	680921	1	1	GSP1	838.172	705.607	12475.9	9875.04	10.6124	7.51679	0	0	AGTATGACCTACG	AGTATGACCTATG	0	0	1	2	0	0	0
1605805	12	721668	12	680898	1	0	GSP1	2418.14	258.951	38035.8	4059.92	10.6124	8.23736	0.498036	0	TGACGAACC-ACG	GGGAGAAACTACG	1	0	5	4	0	0	0
1605846	12	721627	12	680857	1	0	GSP1	1360.72	581.496	21668.9	10254.2	10.3478	8.23736	0.94344	0.94344	ATCGCTCTGGACG	ATCGCACTGGACG	1	1	1	0	0	0	1
1607439	12	722602	12	681823	1	1	ATP14	754.864	1017.02	13558.4	17086.7	9.39237	9.44754	0.921446	0.855456	ATCGCCATACACG	ATCACAATATACG	1	1	3	2	0	0	1
1615156	12	757273	12	716287	1	1	CDC25	1296.05	1377.24	20440.5	20118.1	8.10111	9.21923	0	0	----------TCG	TATTGACCGCTCA	0	0	11	2	0	0	0
1615205	12	757224	12	716238	1	1	CDC25	1112.03	922.696	15971.6	15007.1	8.1719	8.1719	0.965434	0.965434	ATCGCGGGAGACG	ATCGCGGGAGACG	1	1	0	1	0	0	1
1619753	12	784002	12	743020	0	1	TMA10	19.9039	712.687	739.713	10162.7	10.0525	10.0525	0	0	CTCACGACGAAGT	CACACGACGAGCC	0	0	4	1	0	0	0
1621770	12	787485	12	746830	1	1	CHS5	763.309	900.922	13742	14049.5	8.36088	8.36088	0	0	CTT----------	CTTGAACCATACC	0	0	10	1	0	0	0
1621804	12	787519	12	746864	1	1	CHS5	967.95	721.133	15627.8	12524.4	8.36088	8.36088	0.890021	0.890021	GTCACTTAAGACG	GTCACTTAAGACG	1	1	0	4	0	0	1
1621848	12	787562	12	746907	0	1	CHS5	431.945	963.258	7052.27	14653.5	6.70699	12.1345	0	0.644148	GCAATAAATAATG	GTAACAAGTAACG	0	1	4	4	0	0	0
1623594	12	796840	12	755843	1	0	RPS25B	911.633	2.00462	14009.9	34.0785	8.11754	6.24199	0	0	CAAT---------	CAATGCCGCATCT	0	0	9	10	0	0	0
1623633	12	796806	12	755809	1	0	RPS25B	1277.88	5.03262	17287.7	96.8779	8.66116	5.026	0.838181	0	ATCATCACATACG	-TC-TCCCA---G	1	0	6	3	0	1	0
1625686	12	805311	12	762928	1	0	VRP1	768.444	0	12914	6.29077	5.45584	6.58915	0.912016	0	TAACCTAG-----	TAGCCGAGGAAGA	1	0	7	6	0	1	0
1625781	12	805259	12	763022	1	0	VRP1	897.798	0	14068.1	0	6.21672	5.97543	0.505106	0	GAC--GGCGGCCG	GACAAGCAAGCCG	1	0	5	6	0	0	0
1629908	12	826750	12	786512	0	1	KAP95	621.308	1343.21	9723.51	21310.7	7.22164	9.43675	0	0	ATCCATTTGATCG	GTTAATTTGATCG	0	0	3	1	0	0	0
1629947	12	826711	12	786473	1	1	KAP95	1202	870.004	17996.8	14723.8	7.22164	9.43675	0.816179	0.877458	ATCATGTTAAACG	ATCACGTTAAACG	1	1	1	2	0	0	1
1632915	12	837546	12	797362	1	0	TAL1	725.284	595.973	11529.4	10022.9	9.44754	9.44754	0	0	GTTAGTATATACG	GTTAGTATATACG	0	0	0	0	0	0	0
1635908	12	853360	12	813167	0	1	NMD4	558.413	958.93	12249.6	15636.8	9.00721	9.00721	0	0	CAGTTTATTAACG	CAGATTATTAACG	0	0	1	1	0	0	0
1635961	12	853308	12	813114	1	1	NMD4	1081.69	1557.29	18470.2	25477.8	10.6124	7.73473	0.890021	0.899452	GTCACGTTTTACG	ATCACGTTTGACG	1	1	2	3	0	0	1
1638921	12	862422	12	822318	1	0	ARC18	949.065	387.499	12946.8	9429.96	8.76001	8.76001	0	0	ATGATAGTGAAAA	ATGATAATGAAAA	0	0	1	0	0	0	0
1638965	12	862378	12	822274	1	1	ARC18	859.136	967.737	13110	14170.6	8.76001	8.76001	0.882169	0.882169	ATCATCCACCACG	ATCATCCACCACG	1	1	0	0	0	0	1
1639891	12	871462	12	831353	0	1	VID22	217.118	787.411	4721.52	13311.6	6.25625	8.76001	0.850744	0.82875	GTCATTTACCACG	GTCATTTCATACG	1	1	3	2	0	0	1
1641804	12	877826	12	837701	1	1	SEC61	667.949	1425.37	11654.2	19923.8	7.98357	9.80863	0	0	AGAACAAGAGATG	AGAACAAGAGATG	0	0	0	2	0	0	0
1641855	12	877775	12	837652	0	1	SEC61	552.599	1513.13	8573.03	23630.9	7.98357	9.80863	0.872739	0.934017	GTCATGTCACACG	GTCACGTTGCACG	1	1	3	3	0	0	1
1642059	12	877573	12	837487	0	1	SEC61	348.51	1046.13	4930.61	13096.1	5.36846	7.16361	0	0	ATAAGCTAGAATG	AAAAACTTGAGCG	0	0	5	2	0	0	0
1646441	12	912471	12	872343	1	1	VPS33	1282.04	899.688	19738.2	15659.9	9.06161	8.5041	0	0	ATTTCTATCTACT	TTCTCTACCTGCT	0	0	4	1	0	0	0
1646479	12	912433	12	872307	1	1	VPS33	1244.48	1096.29	18893.9	17161.5	9.06161	8.5041	0.899452	0.899452	ATCACTTCACACG	ATCACTCCATACG	1	1	2	2	0	0	1
1647414	12	919176	12	879065	1	1	SKI2	1793.98	2665.37	28118.8	41391.1	9.49027	9.43675	0	0	TTGTCTCAGAACG	TCATCTCCTGATA	0	0	7	3	0	0	0
1647450	12	919140	12	879029	1	1	SKI2	1599.83	1228.93	23594.1	22969.7	9.49027	9.43675	0.94344	0.921446	ATCACGACGGACG	ATCACGATGGACG	1	1	1	3	0	0	1
1648383	12	921706	12	881616	1	1	BDF1	1225.94	700.786	20297.8	11029.2	6.86523	6.86523	0.658287	0.658287	ATACTTCGCGACG	ATACTTCGCGACG	1	1	0	0	1	0	0
1648448	12	921643	12	881551	1	1	BDF1	1113.43	1311.65	17491.8	19879.3	6.183	6.2128	0	0	ATTATTTGGGAAG	ATGATTTGGGAAG	0	0	1	2	0	0	0
1648476	12	921616	12	881523	1	1	BDF1	1658.18	869.468	24288.3	13917.1	7.91454	7.91454	0.850744	0.850744	GTCATTACGTACG	GTCATTACGTACG	1	1	0	1	0	0	1
1649716	12	924838	12	884756	1	1	DUS3	1154.64	961.681	18835	16100.4	9.80863	9.80863	0	0	ATTTCAATTGATT	ATTTCAATTGATT	0	0	0	0	0	0	0
1649756	12	924798	12	884716	1	0	DUS3	681.868	638.901	10078.4	9953.3	9.80863	9.80863	0.956012	0.956012	GTCCCCTTGCACG	GTCCCCTTGCACG	1	1	0	1	0	0	1
1652915	12	932591	12	892565	1	0	YLR407W	727.448	522.061	12011.1	8728.94	13.3884	7.59425	0.562451	0.562451	AGCATTACACACG	AGCATTAGTCACG	1	1	2	4	1	0	0
1652965	12	932640	12	892610	1	1	YLR407W	810.331	898.58	13830.9	15029.9	6.63487	6.63487	0.562451	0.562451	AGCATTACACACG	AGCATTAGTCACG	1	1	2	4	0	0	0
1659095	12	965724	12	920128	1	1	RPN13	1328.72	1962.9	24321.3	31476.7	7.45247	7.45247	0.877458	0.877458	ATCACGAAATACG	ATCACGTAATACG	1	1	1	4	0	0	1
1659167	12	965652	12	920056	1	1	RPN13	1273.47	1573.52	22103.8	26356.4	8.4751	8.4751	0.570306	0	ATCACGAAATACG	ATCACGTAATACG	1	0	1	4	0	0	0
1662239	12	990611	12	939676	1	1	CRN1	1623.72	1993.31	24108.7	29058.3	7.85522	7.85522	0	0	ATGCATTTGGACT	ATGCACTTGAACT	0	0	2	1	0	0	0
1662280	12	990651	12	939717	1	1	CRN1	1404.69	1934.17	24445.8	33442.1	9.06283	9.06283	0.921446	0.921446	ATCACGCACAACG	ATCACGCACAACG	1	1	0	0	0	0	1
1668239	12	1028058	12	976964	1	1	VMA6	1905.56	2376.12	32775.3	41621.3	10.8755	10.8755	0	0	GTATTATGGAACT	GTACTATGTAACT	0	0	2	2	0	0	0
1668277	12	1028020	12	976926	1	1	VMA6	1687.8	2728.65	25681.7	40187.4	10.8755	10.8755	0.890021	0.890021	GTCACTTTGTACG	GTCACTTTGTACG	1	1	0	0	0	0	1
1669962	12	1032312	12	981166	1	1	HMG2	2185.95	943.597	31428.8	18435.1	10.8161	7.76753	0	0	GTAATATGTAAAG	GCAATATGTATGG	0	0	3	4	0	0	0
1670008	12	1032358	12	981212	1	1	HMG2	1544.61	879.684	23087.5	12984.7	7.76753	9.39808	0.860175	0.838181	ATCGTTAGAGACG	ATCGTTAGAAACG	1	1	1	1	0	0	1
1671180	12	1043758	12	992641	1	1	RIF2	1091.28	3223.19	17685.6	52849.1	13.3884	9.49027	0	0.57502	AGTATATTTCCCG	GGCATGTTCTACG	0	1	6	4	0	0	0
1671217	12	1043722	12	992604	0	1	RIF2	535.411	2850.68	9532.7	49070.5	13.3884	9.43675	0.899452	0.57502	ATCACGTTACACG	ATCACGTCACACG	1	1	1	5	0	1	0
1671591	12	1043389	12	992244	1	0	RIF2	829.853	483.378	14186.6	7729.97	8.16642	8.16642	0.838181	0.816179	ATCATTTCCAACG	ATCATTTTCAACG	1	1	1	1	0	0	1
1678536	13	259123	13	252484	0	1	GIS4	7.59659	1315.7	694.897	20075.1	6.79103	6.84187	0	0.912016	TCCTATTATCATA	TC---TTAGCACG	0	1	6	2	0	1	0
1678586	13	259074	13	252440	0	1	GIS4	116.113	1302.54	2016.32	19202.7	7.00157	7.00157	0	0.912016	TCCTATTATCATA	TC---TTAGCACG	0	1	6	2	0	1	0
1680283	13	245902	13	239215	1	1	ERV25	2506.11	6001.96	38988.7	90115.1	9.00721	9.00721	0.816179	0.838181	ATCTTCTTCATCC	ATCTTCTTCAACG	1	1	2	3	0	0	1
1680327	13	245946	13	239259	1	1	ERV25	2550.93	2703.75	38697.6	39771.9	10.8755	10.8755	0.816179	0.706991	ATCGTTAAAAACG	CTCGTTAAAAACG	1	1	1	1	1	1	0
1680369	13	245988	13	239301	1	1	ERV25	1544.57	3292.14	22671.1	43714.9	7.51679	7.51679	0.666143	0.666143	GTAACAACCAACG	GTAACAACCAACG	1	1	0	0	1	0	0
1681048	13	241930	13	235251	1	1	PPZ1	3109.72	3832.27	56990.1	64642.4	9.76467	9.76467	0	0	AT--TGATATATG	ATGTTCATATATG	0	0	3	3	0	0	0
1681089	13	241889	13	235211	1	1	PPZ1	3413.2	3203.77	45933.6	45809.7	9.76467	11.3052	0.82875	0.82875	GTCATTTCAAACG	GTCATTTCAAACG	1	1	0	1	0	0	1
1685765	13	209250	13	202663	1	0	AMD1	1480.02	41.2	23694.9	685.898	7.22498	7.22498	0.921446	0.921446	ATCACCCTGAACG	ATCACCCTGAACG	1	1	0	2	0	0	1
1686374	13	204367	13	197797	0	1	YMD8	614.348	713.349	8956.64	10772.3	10.08	10.0525	0.916735	0.540456	GTCATCGGCGACG	GTCATCGACGACG	1	1	1	1	1	1	0
1693180	13	178237	13	183164	1	1	GSF2	1930.26	1176.14	26346.4	17402.9	8.7433	8.7433	0	0	ATGGCTTATGACG	ATGGCCCATGATG	0	0	3	0	0	0	0
1693226	13	178283	13	183210	1	1	GSF2	1772.64	862.666	26022.4	12436.2	8.7433	8.7433	0.978006	0.978006	GTCGCCCCACACG	GTCGCCCCACACG	1	1	0	0	0	0	1
1700988	13	135303	13	140219	1	1	POB3	690.144	1321.89	10631.5	21467.6	8.01976	8.01976	0.921446	0.94344	ATCGCGAAGAACG	ATCGCGAGGAACG	1	1	1	2	0	0	1
1701045	13	135360	13	140274	0	1	POB3	442.003	1055.51	6857.56	17266	9.00721	7.86731	0	0	ATCGTTCTTCGCG	ACCGTTCCTCGCG	0	0	2	1	0	0	0
1701742	13	132828	13	137267	0	1	COG8	0	1270.47	11.7132	19346	7.55825	8.01976	0	0.899452	ACTCAATTATACA	A------TATACG	0	1	7	7	0	1	0
1701788	13	132793	13	137228	0	1	COG8	6.36586	1237.25	114.755	20270.5	8.11754	8.01976	0	0.899452	ACTCAATTATACA	A------TATACG	0	1	7	7	0	1	0
1711943	13	91852	13	96379	1	0	RPM2	683.269	8.01846	8964.15	163.482	9.89418	9.89418	0.816179	0.816179	ATCATGAAATACG	ATCATGAATTACG	1	1	1	3	0	0	1
1713121	13	86901	13	91498	1	1	PRE8	1846.27	1067.71	27723.8	18366.6	11.6091	6.26857	0	0	ACGTCTATATAAG	--------ATAAG	0	0	8	7	0	0	0
1713166	13	86858	13	91453	1	1	PRE8	2589	1515.88	34987.8	24190.3	11.6091	6.96289	0.899452	0.838181	ATCGCTTTTCACG	ATCGTTTTTCACG	1	1	1	2	0	0	1
1713197	13	86827	13	91423	1	1	PRE8	1191.9	1253.02	15690.2	18793.9	6.70963	6.96289	0	0	CCACCTTAATAAG	CCACCTTAATGCA	0	0	3	0	0	0	0
1714411	13	70271	13	74969	0	1	TSL1	111.572	889.219	1931.27	12724.3	6.75527	5.37924	0	0	CTTGCTGGAAATT	CTTGCTGGTAATT	0	0	1	0	0	0	0
1714729	13	70165	13	74863	0	1	CUE4	237.744	1147.49	4095.37	19266.7	5.891	5.75854	0	0	GTGTCATTGCACA	GTGTCACTGCACA	0	0	1	1	0	0	0
1716503	13	56398	13	61140	1	1	PML39	1039.04	748.854	17624.6	12281.8	6.82854	5.14347	0	0	TGATTTGATAACA	TGATTTGATAACA	0	0	0	3	0	0	0
1716567	13	56334	13	61076	1	1	PML39	1343.75	1076.28	24393.4	19228.7	5.81528	5.67046	0.872739	0.872739	GTCATTCGGAACG	GTCATTCGGAACG	1	1	0	3	0	0	1
1716840	13	54586	13	59360	0	1	YML108W	185.586	773.782	3707.18	11068	9.43675	9.43675	0.877458	0.877458	ATCACGAAAAACG	ATCACGAAAAACG	1	1	0	1	0	0	1
1717933	13	46019	13	50800	0	1	BUL2	63.022	1495.3	1258.7	23828.5	10.8755	9.80863	0	0	GTATCTGTATTAT	ATATCTGTACTAT	0	0	2	3	0	0	0
1717971	13	46053	13	50838	0	1	BUL2	119.381	1321.74	2211.41	23436.8	10.8755	9.80863	0	0	GTATCAA----TG	GTATAAAAGAGTG	0	0	5	2	0	0	0
1720108	13	37849	13	42640	0	1	ATR1	31.4049	1146.27	567.537	19064	7.91454	9.89418	0	0.768264	TTCATTCTGCCAC	CTCACTCT-AAAC	0	1	5	4	0	0	0
1720189	13	37930	13	42719	0	1	ATR1	463.265	1916.7	7128.91	32192.2	9.78349	9.78349	0.894733	0.916735	GTCGTCGCTAACG	GTCGTCGCTGACG	1	1	1	3	0	0	1
1720253	13	37994	13	42774	0	1	ATR1	236.088	1088.9	4093.67	15351	5.6333	4.72614	0	0	CTGCGGCTTGACG	CTGCGGCTTGACG	0	0	0	1	0	0	0
1721879	13	30236	13	35049	1	0	NDI1	720.912	274.669	11655.3	4670.84	10.3477	10.0525	0	0	TTCATTATTGACC	CCCATTTCTGAGC	0	0	5	4	0	0	0
1721926	13	30192	13	35002	1	0	NDI1	921.352	439.661	11956.8	5260.35	7.18183	10.0525	0.934017	0.872739	GTCGCTAGCAACG	GTCGTTAGCAACG	1	1	1	4	0	0	1
1728646	13	272040	13	266177	1	1	CDC5	1409.74	1122.6	22110.8	17587.4	11.3052	8.4751	0	0	ACCGCAATCTCCG	ACCGCAATCTCCG	0	0	0	2	0	0	0
1728694	13	271992	13	266132	1	1	CDC5	1120.6	855.863	17583	13816.1	11.3052	8.92661	0	0.60487	GTGCTTTTATACG	ACTCTTTTA--CG	0	1	5	1	0	0	0
1731355	13	275807	13	269964	0	1	TAF4	494.118	2891.35	8574.56	40333.6	7.81424	8.28099	0	0.540456	---ATATTATAAG	AGCATGTAATACG	0	1	6	4	0	0	0
1731401	13	275847	13	270006	1	1	TAF4	1067.94	5366.73	19115.3	92146.7	8.37958	10.6124	0.816179	0.882169	ATCATTTATGACG	ATCGTTCGTGACG	1	1	3	1	0	0	1
1731453	13	275897	13	270056	1	1	TAF4	796.327	1241.89	11453.1	28532.5	10.8161	7.87207	0.816179	0.882169	ATCATTTATGACG	ATCGTTCGTGACG	1	1	3	1	0	0	1
1733456	13	284684	13	278793	1	1	ANY1	1421.37	923.274	21912.3	14178.6	5.92682	8.16642	0	0	ATAATGTATTATG	ATGATATATTATG	0	0	2	0	0	0	0
1733513	13	284740	13	278850	1	1	ANY1	1645.87	1004.5	28077.9	16567.6	6.27374	6.45755	0.838181	0.860175	ATCATTCTTGACG	ATCATTCTCGACG	1	1	1	1	0	0	1
1737817	13	303093	13	298606	0	1	ERG5	319.863	1193.87	4831.6	16850.9	10.8161	10.8161	0.877458	0.899452	ATCTCTTTACACG	ATCCCTTTACACG	1	1	1	1	0	0	1
1747290	13	337622	13	333183	1	1	ARP9	1887.05	2142.29	30447.1	37537.6	8.36088	8.36088	0	0	ATATTATTTAATG	A-GTTAGTTAAGA	0	0	5	2	0	0	0
1747325	13	337657	13	333218	1	1	ARP9	1064.8	1413.54	19351	23004	8.36088	8.36088	0.890021	0.890021	GTCACTTGTTACG	GTCACTTCTTACG	1	1	1	1	0	0	1
1747367	13	337699	13	333259	1	1	ARP9	1178.15	835.673	18272.5	13714.5	6.82211	9.21923	0	0	ATTTCCGCGCAGT	ATTT-CGCGTAGT	0	0	2	3	0	0	0
1748840	13	347465	13	343008	0	1	MSN2	45.2825	1376.52	733.559	21699.8	7.68371	7.45247	0.626866	0.653574	GTAGCGTAATACA	ATAGCGTAATACG	1	1	2	1	0	0	0
1749168	13	347137	13	342681	1	1	MSN2	973.425	1454.1	13936.7	22441.9	11.3052	11.3052	0	0.57502	GATATGTATGACG	GGCATGTATGACG	0	1	2	1	0	0	0
1749223	13	347082	13	342627	0	1	MSN2	577.765	1271.45	9960.53	19415.1	6.95068	6.95068	0	0	AGCCATTTATACG	AGCCATTTATACG	0	0	0	1	0	0	0
1752812	13	355204	13	350717	1	1	IOC4	1650.41	2362.51	27056	38746.5	11.3052	9.07399	0.570306	0.860175	ATACTTTTATACG	ATCGTTTGGTACG	1	1	4	5	0	1	0
1752889	13	355274	13	350793	1	1	IOC4	789.961	1399.49	15804.9	26271.7	8.83697	6.63487	0	0.475255	CCCGTTAACAGTG	CGCGTTAGCAACG	0	1	4	1	0	0	0
1756791	13	379246	13	362652	1	0	FAR3	2209.72	179.344	32483.6	13347.3	9.21923	10.1896	0	0	ATTTTATTCCCCG	A-----------G	0	0	11	3	0	0	0
1756832	13	379282	13	362690	1	0	FAR3	1514.52	279.147	22240.5	7369.62	9.21923	8.87506	0.872739	0.60487	GTCATTGTCGACG	GTAATTATCGACG	1	1	2	3	0	1	0
1760608	13	396604	13	379961	1	0	ARG7	1341.12	168.809	19111.4	3822.97	7.51679	7.76753	0	0	ATTGAAGGTAGCG	ATTGAGGGTTGCA	0	0	3	2	0	0	0
1760651	13	396561	13	379919	1	0	ARG7	826.076	249.247	13180.1	5585.9	7.51679	7.76753	0.816179	0.838181	ATCATTATTGACG	ATCGTTATTGACG	1	1	1	3	0	0	1
1760721	13	396492	13	379849	1	0	ARG7	898.01	205.061	13966.6	3225.13	9.78349	10.6124	0	0	ATGACTCACTGCG	ATGACTCACTGCG	0	0	0	1	0	0	0
1763132	13	408194	13	391538	0	1	MOT3	522.722	1144.09	9650.94	20534.2	8.87506	8.87506	0.934017	0.94344	GTCACCTTCGACG	ATCGCCTTCGACG	1	1	2	4	0	0	1
1763207	13	408269	13	391613	1	1	MOT3	1328.6	1166.01	21389.4	17951.2	9.43675	12.1345	0	0	ACCTCGTGTAAAG	ACCTCATGTGCAA	0	0	4	3	0	0	0
1763306	13	408368	13	391712	0	1	MOT3	558.541	1983.11	17102.4	36579.4	6.89508	9.76467	0.498036	0.899452	ATCACTGAATACG	ATCGCTGAATACG	1	1	1	1	0	1	0
1763366	13	408428	13	391772	1	1	MOT3	3182.34	2483.06	57238.2	46362.9	9.05234	13.3884	0.877458	0.899452	ATCACTGAATACG	ATCGCTGAATACG	1	1	1	1	0	0	1
1763443	13	408505	13	391849	1	0	MOT3	1045.78	348.111	13090.7	10721.1	10.6124	9.7757	0.956012	0.956012	GTCGCGTGTGACG	GTCGCGTTGGACG	1	1	2	0	0	0	1
1763482	13	408544	13	391888	1	1	MOT3	1593.97	1685.62	22685.7	23651	6.94664	6.94664	0.965434	0.965434	ATCGCAGGGCACG	ATCGCGTGGCACG	1	1	2	4	0	0	1
1764316	13	413025	13	396327	1	1	IRC21	2841.93	1647.56	46589.1	27192.9	11.3052	11.3052	0	0	ATCATCTTCGTCG	GTCATCTTCGTCG	0	0	1	0	0	0	0
1764361	13	412980	13	396284	1	1	IRC21	2872.91	1661.55	46836.4	25738	11.3052	11.3052	0.622152	0.560879	GTAACATTATACG	GTAATATTATACG	1	1	1	1	1	1	0
1765656	13	424849	13	409281	0	1	CTF18	614.772	692.045	8276.68	9455.56	10.8755	10.8755	0	0	TTGTTGATCAACG	TTGTTGATCAACG	0	0	0	1	0	0	0
1765697	13	424808	13	409240	1	1	CTF18	1068.66	1169.37	17568	18857.9	10.8755	10.8755	0.934017	0.934017	GTCGCGTTGTACG	GTCGCGTTGTACG	1	1	0	1	0	0	1
1766095	13	429858	13	414286	1	1	NAM7	2376.59	1930.25	32598.9	30473.7	11.3052	9.07399	0	0	ATCATCAGTTTCC	ATCATCAGTTTCA	0	0	1	2	0	0	0
1766139	13	429814	13	414242	1	1	NAM7	2111.73	1479.54	36104.9	28832.1	9.07399	9.07399	0	0	AAAGCGTATAAAG	AAAGCGTGTAGAC	0	0	3	1	0	0	0
1769241	13	434413	13	418906	1	0	ADH3	735.978	425.16	12761.3	7624.38	11.2505	11.2505	0.94344	0.480754	ATCACTCGCGACG	ATCACTCGCGACG	1	1	0	4	0	1	0
1773228	13	453844	13	438303	1	0	AIP1	849.757	618.175	13403.9	11035.3	12.1345	12.1345	0.855456	0.855456	ATCACTAATTACG	ATCACTAATTACG	1	1	0	4	0	0	1
1773394	13	453680	13	438138	1	0	AIP1	772.561	410.531	11939.7	6434.66	9.39808	6.68629	0	0	GTCTCTAGTGTCC	ACCTCTCATACAC	0	0	7	3	0	0	0
1782083	13	486393	13	471357	1	0	MYO5	982.507	514.789	17972.6	11881.1	7.31039	8.1456	0	0	ATCAAATACTACC	GTC------TACC	0	0	7	4	0	0	0
1782130	13	486439	13	471404	1	1	MYO5	775.277	1015.93	13663.9	16899.8	8.62509	7.91446	0.79497	0.772976	GTCGTGTCCGACG	ATCGTGTCTGACG	1	1	2	2	1	0	0
1789970	13	517339	13	501810	1	1	STO1	2824.96	1721.05	47615.9	29447.9	10.8161	11.3052	0.877458	0.82875	ATCACTTTACACG	GTCATTTTACACG	1	1	2	2	0	0	1
1790017	13	517384	13	501855	1	1	STO1	1871.22	1169.41	28753	23930.5	10.8161	10.8161	0.877458	0.82875	ATCACTTTACACG	GTCATTTTACACG	1	1	2	2	0	0	1
1790067	13	517433	13	501905	1	1	STO1	1213.5	1532.19	19207.6	28466.8	6.29847	6.54941	0	0	TTTTTTTC-AACT	TTTTTTTCCAACT	0	0	1	2	0	0	0
1791112	13	527639	13	512143	1	1	POM152	7268.75	1596.06	117059	26816.4	8.28099	8.21919	0.806756	0.82875	GTCATTATATAC-	GTCATTGTATACG	1	1	2	4	0	0	1
1791169	13	527695	13	512199	1	1	POM152	4587.88	2840.28	68771.1	41622.9	11.3052	7.3221	0.609584	0.631579	ATAACTTTATACG	ATAACTTGATACG	1	1	1	3	1	0	0
1796221	13	540161	13	524612	0	1	GID8	284.639	1303.39	5459.45	21823.8	7.91454	7.91454	0.934017	0.934017	GTCTCCTGCAACG	GTCTCCTGCAACG	1	1	0	0	0	0	1
1798910	13	557408	13	541954	1	1	NDE1	1065.77	1527.52	19315.3	27143.7	7.73704	8.83697	0	0	ATATGCATATACG	ATATGCATATACG	0	0	0	3	0	0	0
1798989	13	557333	13	541879	1	1	NDE1	1852.76	1355.79	34830.1	26777.6	8.1643	6.79102	0.631579	0.653574	ATATCTTGATACG	ATACCTTGATACG	1	1	1	6	0	0	0
1803848	13	577520	13	563238	0	1	HLJ1	183.549	832.705	2688.26	13226.5	9.44754	9.70093	0	0	ATCATTAATCAAG	ATCATTAATCAAG	0	0	0	0	0	0	0
1803878	13	577550	13	563268	0	1	HLJ1	207.909	861.197	3622.22	13158.4	9.44754	9.70093	0.570306	0.570306	ATAATATGTTACG	ATAATATGTTACG	1	1	0	1	1	0	0
1813017	13	618331	13	610465	1	1	FPY1	1986.57	924.213	32421.2	18009.4	6.46119	6.41913	0.872739	0.872739	GTCGTTTTCCACG	GTCGTTTTCCACG	1	1	0	3	0	0	1
1813090	13	618403	13	610536	1	1	FPY1	1342.14	788.266	20156	13245.4	8.28099	8.16642	0	0	TGCCCGAGAGACT	CGCCCGAGAGACT	0	0	1	3	0	0	0
1820233	13	659402	13	651451	1	0	VTI1	1362.63	621.203	20662.5	10423	6.09375	5.39673	0	0	GATACCACTGTCG	GGTACCATCATCG	0	0	4	3	0	0	0
1820311	13	659324	13	651376	1	0	VTI1	997.573	641.887	14733.2	10847.8	7.22498	7.1723	0	0	ATTACTGATCACA	GTT--TG-TCACA	0	0	4	2	0	0	0
1820348	13	659288	13	651344	1	0	VTI1	878.573	182.992	12397.5	2759.36	6.84187	6.17636	0	0	CTCCTAACTTTCA	CTCCTAA-TTTCA	0	0	1	2	0	0	0
1821734	13	664476	13	656536	1	1	ROT1	1287.94	1557.46	20792.6	23676.4	7.36079	6.79103	0.838181	0.838181	ATCATCATGAACG	ATCATCATGAAC-	1	1	1	0	0	0	1
1822706	13	668311	13	660341	1	1	TOM40	2122.04	764.614	31201.1	11642.1	10.0525	10.0525	0	0	ATAATAGTAATAG	ATAA---------	0	0	9	5	0	0	0
1822749	13	668354	13	660383	1	0	TOM40	1552.8	437.103	22561.5	7604.62	10.0525	10.0525	0.921446	0.850744	ATCACCTACGACG	GTCATTTACGACG	1	1	3	2	0	0	1
1823346	13	671487	13	663495	1	1	INP1	1841.77	2366.39	30307.3	42667.9	9.43675	7.84015	0	0	ATATTTATACATG	TTATTTATACATG	0	0	1	2	0	0	0
1823388	13	671445	13	663453	1	1	INP1	1101.55	2469.41	18255.5	35673	9.43675	7.84015	0.899452	0.934017	ATCACGAAGAACG	GTCACGAAGGACG	1	1	2	1	0	0	1
1826452	13	701549	13	693574	0	1	SKY1	397.484	1108.23	6699.26	15299.3	6.66544	6.66544	0	0	TTTTT------CT	TTTTTTTTCTTCT	0	0	6	1	0	0	0
1826623	13	701379	13	693404	1	1	SKY1	1178.15	1320.07	17497.4	19464.8	10.3477	10.3477	0.899452	0.877458	-TAGTGATATAAT	ATAGTGATACAAA	1	1	3	6	0	0	1
1830486	13	731349	13	723515	1	0	RRP5	714.716	336.192	11553.2	6088.62	11.2505	9.80863	0.899452	0.834247	ATCACTTTGCACG	ATCATTTTGCACG	1	1	1	3	0	1	0
1833075	13	742882	13	734963	1	1	RNA1	1752.9	1929.22	27415.3	29505.2	9.89418	8.28099	0.912016	0.850744	GTCA-CTATGCAC	GTCATCT-TGAAC	1	1	3	1	0	0	1
1833122	13	742837	13	734918	1	1	RNA1	1580.85	1861.52	24154.7	28767.5	9.89418	8.34901	0.912016	0.850744	GTCA-CTATGCAC	GTCATCT-TGAAC	1	1	3	1	0	0	1
1833382	13	743534	13	735612	1	1	BCH1	3179.36	2822.92	50480.9	46590.7	9.39237	9.39237	0	0	ATTCTACATGACG	ATTCTACATTACA	0	0	2	1	0	0	0
1833421	13	743571	13	735651	1	1	BCH1	3590.64	1067.99	63978.3	15466.2	9.39237	9.39237	0.899452	0.899452	ATCACGATACACG	ATCACGATACACG	1	1	0	1	0	0	1
1833451	13	743601	13	735677	1	1	BCH1	1479.38	2790.13	23569.6	47377.4	9.39237	6.54181	0	0	ATGT--TCTCTAA	ATGTTATTTCTGG	0	0	5	1	0	0	0
1844306	13	790022	13	782752	1	0	TIF11	782.407	498.903	12417.9	7749.19	9.39808	9.39808	0.816179	0.860175	ATCATTATACACG	ATCGTTACGTACG	1	1	4	2	0	0	1
1852568	13	831607	13	823989	1	1	CAT8	1411.18	705.264	21483.7	11404.8	10.3478	6.95068	0	0	ATATTTACCAATA	A-ACTTCCTAAAT	0	0	6	1	0	0	0
1852601	13	831574	13	823958	1	1	CAT8	879.38	705.457	13771.9	12010.5	10.3478	6.95068	0.877458	0.899452	ATCGCTTAATACG	ATCGCGTAATACG	1	1	1	1	0	0	1
1856335	13	841844	13	834388	1	1	NGL2	1021.13	807.734	17373.2	15263.6	8.72652	9.06283	0.872739	0.860175	GTCTTTCTGCACG	ATCTTTCTGCACG	1	1	1	1	0	0	1
1856398	13	841781	13	834325	1	1	NGL2	1063.48	780.139	18323	12203.3	5.2979	7.51679	0	0	GTCTTTCTGCACG	ATCTTTCTGCACG	0	0	1	1	0	0	0
1859820	13	861368	13	853916	1	1	LCB1	916.132	666.261	13952.5	10712.3	11.3052	8.21919	0.582875	0.60487	GTACTTTTATACG	GTAGTTTCATACG	1	1	2	2	1	0	0
1859869	13	861320	13	853867	1	0	LCB1	1315.06	108.972	22376.8	3889.1	11.3052	11.3052	0.582875	0.60487	GTACTTTTATACG	GTAGTTTCATACG	1	1	2	2	0	0	0
1862866	13	874752	13	867349	1	1	ADH2	1450.86	1074.79	20974.3	15826.4	6.59528	7.14065	0	0	GTAACTGATTAAT	GTAACTGATTAAT	0	0	0	0	0	0	0
1862909	13	874709	13	867307	1	0	ADH2	1183.84	465.294	18108.5	7341.55	6.59528	7.14065	0.82875	0.850744	GTCTTCATTAACG	GTCTTCATCAACG	1	1	1	1	0	0	1
1867094	13	892494	13	885094	0	1	PSE1	587.993	749.324	10021.7	12712.4	8.83697	8.24355	0.882169	0.882169	ATCATGACGCACG	ATCATGACGCACG	1	1	0	1	0	0	1
1867380	13	895647	13	888263	1	1	NIP1	689.72	766.745	10591.4	11688.8	8.36088	8.36088	0.750982	0.750982	GTCGTTTCCAACG	GTCGTTTCCAACG	1	1	0	0	1	0	0
1867703	13	896855	13	889465	0	1	YMR310C	425.282	1517.28	14623.9	23628.2	9.43675	9.43675	0	0	GTATAGGTAAACG	GTATAGGTAAACG	0	0	0	1	0	0	0
1867753	13	896805	13	889415	1	1	YMR310C	1403.76	1042.4	21014.2	22402.8	9.43675	9.43675	0.921446	0.921446	ATCACGCGAAACG	ATCACGCGAAACG	1	1	0	0	0	0	1
1872606	14	627326	14	618614	1	1	RLP7	1124.72	868.361	17974.9	13821.5	7.83518	6.74483	0	0	AT----ATACAAA	ATGTTAGTAAAAA	0	0	6	3	0	0	0
1872648	14	627286	14	618576	1	1	RLP7	1129.09	723.691	20262.9	12490.1	7.83518	6.74483	0.921446	0.912016	ATCACGCAGTACG	GTCACACTGTACG	1	1	3	3	0	0	1
1873404	14	622801	14	614053	1	1	MRP7	948.258	1272.14	14255.7	20048.2	6.65169	5.73994	0.82875	0.806756	GTCATTTGAAACG	GTCATTTAAAACG	1	1	1	4	0	0	1
1873456	14	622749	14	614001	0	1	MRP7	232.396	894.144	3946.96	14756	9.89418	5.70372	0.82875	0.806756	GTCATTTGAAACG	GTCATTTAAAACG	1	1	1	4	0	0	1
1876703	14	604830	14	596118	0	1	PBI2	154.266	771.501	2603.59	14915.5	7.97921	10.1408	0.558523	0.485467	CGCACCCGTGACG	CGCACCCGTGATG	1	1	1	7	0	1	0
1876747	14	604874	14	596162	1	0	PBI2	673.296	611.288	10976.9	9405.62	7.83518	7.78372	0.706991	0.728987	CTCATTAAGTACG	CTCATTAGGTACG	1	1	1	5	1	0	0
1891070	14	552164	14	548794	1	1	COG6	4276.84	1454.82	68392.5	24786	9.06283	7.73473	0	0	TGCTTTCTGTTCG	GGCTTTCTATTCA	0	0	3	3	0	0	0
1891111	14	552123	14	548755	1	1	COG6	3526.39	1234.13	50874.1	25026.5	8.1719	7.73473	0.894733	0.872739	GTCGTCTGAGACG	GTCGTCAAAGACG	1	1	2	3	0	0	1
1893126	14	545057	14	542332	0	1	YIP3	572.163	1139.49	9608.63	18577.5	8.22048	5.9519	0	0	ATAACCTACTAAT	ATAACTTATTTAT	0	0	3	2	0	0	0
1893172	14	545103	14	542378	0	1	YIP3	211.007	865.29	3638.38	12924.2	8.22048	9.07399	0.894733	0.894733	GTCGTGCGATACG	GTCATGCGGTACG	1	1	2	3	0	0	1
1898808	14	515088	14	518552	1	1	ARP5	2376.25	3195.58	42077.5	47416.3	7.12767	9.39808	0	0	AGAATTTACAACG	GTAATTCTTATCT	0	0	7	1	0	0	0
1898851	14	515049	14	518510	1	1	ARP5	2777.17	2090.44	43823.1	33871.1	7.51679	9.39808	0.838181	0.838181	ATCATAGTCTACG	ATCATAGTCTACG	1	1	0	3	0	0	1
1899575	14	507498	14	510985	0	1	YDJ1	610.571	1091.17	8509.54	15436.7	10.8755	10.8755	0.570306	0.592302	ATAATTTTGTACG	ATAGTTTTGTACG	1	1	1	2	1	0	0
1901175	14	500540	14	504013	1	0	SUN4	1484.77	620.817	20304.1	11877.9	6.83074	7.05378	0	0	TTTTTTGGTAAAG	TTTTTTGGTAAAG	0	0	0	2	0	0	0
1901214	14	500579	14	504051	0	1	SUN4	612.056	916.64	10747.5	15988.4	6.83074	7.05378	0.816179	0.838181	ATCATTTGTAACG	ATCATTTGCAACG	1	1	1	3	0	0	1
1901251	14	500606	14	504077	1	0	SUN4	759.108	326.446	13400.7	6064.62	6.11889	5.05724	0	0	TGATTGCAAGACT	T--TTGTCAGACT	0	0	4	4	0	0	0
1904639	14	493158	14	496575	1	1	TOM7	1154.22	844.582	17818.5	15749.6	8.16642	11.6091	0.899452	0.921446	ATCACGTCAAACG	ATCACGTCGAACG	1	1	1	5	0	0	1
1904687	14	493206	14	496623	1	0	TOM7	726.302	608.94	11179.7	9882.73	6.48353	11.6091	0.899452	0.520031	ATCACGTCAAACG	ATCACGTCGAACG	1	1	1	5	0	1	0
1904989	14	491333	14	494770	1	1	LAT1	861.004	1226.65	13950.7	17214.8	6.31622	11.3052	0.934017	0.934017	GTCACGCTTCACG	GTCACGCTTCACG	1	1	0	2	0	0	1
1906437	14	483195	14	486631	1	0	MKS1	795.775	406.715	13110.3	5850.02	10.8161	7.11597	0.710133	0.710133	GTAACCTCCCACG	GTAACCTCCCACG	1	1	0	1	1	0	0
1908273	14	476804	14	480203	1	1	SWS2	1282.3	1710.13	20744.2	30224.3	5.61257	9.06283	0	0	ATAATCATTCAA-	ATGGTCATTCAAG	0	0	3	5	0	0	0
1908326	14	476751	14	480151	1	1	SWS2	1897.79	2240.17	37285.7	40162.9	9.76467	10.3477	0.899452	0.855456	ATCCCTATTGACG	ATCACTATTAACG	1	1	2	3	0	0	1
1909090	14	471286	14	474667	1	1	END3	1277.63	1686.48	22750.7	28983.2	10.1896	10.1896	0.816179	0.816179	ATCATATTTGACG	ATCATATTTGACG	1	1	0	3	0	0	1
1909139	14	471237	14	474618	1	1	END3	1520	2041.78	24363.3	30067.5	9.39237	8.11754	0.816179	0.816179	ATCATATTTGACG	ATCATATTTGACG	1	1	0	3	0	0	1
1909392	14	466712	14	470097	1	1	MKT1	1530.06	1107.72	22599.2	16949.6	8.83697	8.76515	0	0	GTAAAAGGAATCG	GTGAAAGAAATTG	0	0	3	2	0	0	0
1909427	14	466747	14	470131	1	1	MKT1	727.618	1172.08	13487.7	19123.5	8.83697	8.76515	0.860175	0.838181	ATCGTTTCTCACG	ATCATTTCTCACG	1	1	1	4	0	0	1
1915590	14	441271	14	439571	1	0	RAS2	2605.55	46.66	40567.1	967.213	10.7476	7.78372	0	0	ATATATATATATG	GTATATATTTGT-	0	0	4	5	0	0	0
1915637	14	441227	14	439528	1	0	RAS2	2219.56	27.872	36995.5	487.429	7.78372	7.78372	0	0	ATA--CGGCCACG	ATATACGGCCATC	0	0	4	4	0	0	0
1919790	14	418726	14	417043	1	1	NOP15	3264.88	1179.6	50937.7	22212.1	8.09605	8.09605	0	0	ATCCTGCTAAACC	AACTTGCTGAACT	0	0	4	3	0	0	0
1919830	14	418687	14	417003	1	1	NOP15	3256.43	1601.67	46460.8	22779.4	8.09605	8.09605	0.728987	0.750982	CTCATTACAGACG	CTCATTCCAGACG	1	1	1	4	1	0	0
1920196	14	417732	14	416049	1	1	CYB5	2069.2	1043.21	32864	19486.2	8.16642	8.16642	0.816179	0.850744	--CATTGAATACG	GTCATCAGATACG	1	1	5	1	0	0	1
1920248	14	417684	14	416003	1	0	CYB5	1668.45	321.136	29242.8	8891	8.16642	9.7757	0.816179	0.850744	--CATTGAATACG	GTCATCAGATACG	1	1	5	1	0	0	1
1920846	14	413337	14	411664	1	1	DBP2	3484.46	3128.21	53529.5	51160.4	10.8755	10.8755	0.623723	0.623723	AGCACCTTGTACG	AGCACCTTGTACG	1	1	0	1	1	0	0
1920905	14	413391	14	411717	1	1	DBP2	2708.04	3309.35	51011.7	53404.6	7.45247	8.1643	0.623723	0.623723	AGCACCTTGTACG	AGCACCTTGTACG	1	1	0	1	0	0	0
1921317	14	412644	14	410976	0	1	YNL115C	262.146	952.94	5351.27	12969.8	9.06161	10.8161	0.877458	0.816179	ATCACTTGTTACG	ATCATTTTACACG	1	1	4	5	0	0	1
1921384	14	412585	14	410914	1	0	YNL115C	688.744	211.93	10168.7	5346.2	6.2873	9.70093	0.60487	0	TAATG-GTAAACG	TAATGAG--AACG	1	0	3	4	0	0	0
1922162	14	408166	14	406438	1	1	DMA2	920.8	748.409	14161.4	12362.4	9.87881	10.7476	0	0	ATGATTCATTGCT	ATGAATCATTATT	0	0	3	4	0	0	0
1922201	14	408204	14	406477	1	0	DMA2	747.267	664.793	12633.3	11337.8	9.87881	10.7476	0.94344	0.978006	ATCACGGTCGACG	GTCACGGGCGACG	1	1	2	3	0	0	1
1922875	14	405830	14	404112	1	0	DCP2	1158.54	618.494	19176.1	13084.8	8.11754	7.71295	0	0	GGCCCAATGGAAG	GGCCCAATGGACC	0	0	2	4	0	0	0
1922948	14	405760	14	404040	1	1	DCP2	1517.54	2992.65	26834	52778.3	10.3477	10.3477	0	0	ATCACTATATACG	ATCATTAAACACG	0	0	3	4	0	0	0
1922985	14	405724	14	404003	1	1	DCP2	948.81	1036.25	16053.8	17430.7	10.3477	10.3477	0.899452	0.899452	ATCACTAAGCACG	ATCACTAACCACG	1	1	1	2	0	0	1
1923365	14	400907	14	399151	1	1	TOM70	1816.35	1352.38	23976.5	21791.4	7.51679	8.16642	0	0	CTGTTATAGTACC	CCGTTATAGTACC	0	0	1	0	0	0	0
1923403	14	400869	14	399118	1	1	TOM70	3697.12	1312.1	57049.7	23630.1	7.51679	8.16642	0.816179	0.816179	ATCATTATCTACG	ATCATTATGTACG	1	1	1	6	0	0	1
1923585	14	400711	14	398959	1	0	TOM70	1503.19	651.507	23815.4	10907.1	9.44754	9.89418	0	0	CTTTCCTTCCACT	---TCCT--CAAT	0	0	6	7	0	0	0
1923623	14	400677	14	398923	1	1	TOM70	1875.38	1202.29	29502.2	18622.4	9.7757	9.89418	0.877458	0.890021	ATCACTGTATACG	GTCACTATACACG	1	1	3	2	0	0	1
1923939	14	394487	14	392720	1	0	NMA111	1221.74	429.084	23353	7663.25	9.89418	8.11754	0.860175	0.860175	ATCATGTCACACG	ATCATGTCACACG	1	1	0	4	0	0	1
1924001	14	394546	14	392780	1	0	NMA111	700.329	340.755	11533.7	5711.31	8.11754	8.11754	0	0	ATA--ATTTTTCT	ATATTTTTTTTCT	0	0	3	0	0	0	0
1928358	14	378584	14	376802	1	1	TOM22	1449.8	2015.21	25043.9	32976.1	10.3478	7.91446	0	0	ATGTTTCTATTCT	ATGTTTCTGTTAT	0	0	2	2	0	0	0
1928398	14	378622	14	376841	1	1	TOM22	1928.77	2145.21	34566.9	38649.5	10.3478	8.83697	0.94344	0.860175	ATCGCTCGACACG	ATCGTTCAACACG	1	1	2	2	0	0	1
1930336	14	370290	14	368535	1	1	NAM9	1920.92	1462.91	32247.2	26759.9	9.00721	9.00721	0	0	CTAATA--AACTC	CTTATACTAACT-	0	0	4	8	0	0	0
1930378	14	370249	14	368493	1	1	NAM9	787.499	1617.24	12844.9	26237.9	9.00721	9.00721	0.860175	0.860175	ATCGTGCTTAACG	ATCGTGCTTAACG	1	1	0	1	0	0	1
1930413	14	370215	14	368458	1	0	NAM9	1049.31	515.921	16847	10649.2	6.38353	8.1643	0	0	GCAGCCGGATACG	GCAGCCGAATGGG	0	0	3	2	0	0	0
1930776	14	366590	14	364830	1	1	SRV2	1215.24	1371.57	21814.7	24944.1	8.83697	10.8161	0.794185	0.816179	ATCATTTTAAACG	ATCATTTTACACG	1	1	1	3	0	0	1
1930826	14	366639	14	364879	1	1	SRV2	908.111	1376.77	15151.7	22147.1	9.76467	7.3978	0.794185	0.816179	ATCATTTTAAACG	ATCATTTTACACG	1	1	1	3	0	0	1
1931765	14	355656	14	353937	0	1	MEP2	661.88	673.214	9178.04	9653.73	6.21672	11.2505	0	0	ATCCTGTAAAAAC	ATCTTGTAAAAAC	0	0	1	3	0	0	0
1934658	14	355622	14	353897	1	0	YNL144C	681.571	35.1862	12720.8	693.893	5.88216	6.95068	0	0	ATTTTAGCTCACT	TCTTTGGATCACT	0	0	4	3	0	0	0
1937213	14	346206	14	344366	1	1	GIM3	2817.1	1664.86	41551.6	30841.5	8.13063	8.13063	0.838181	0.850744	ATCATGAATGACG	GTCATGTATGACG	1	1	2	1	0	0	1
1937262	14	346157	14	344317	1	1	GIM3	1781.8	1233.68	29653.2	19919.4	7.46334	6.31384	0.838181	0.850744	ATCATGAATGACG	GTCATGTATGACG	1	1	2	1	0	0	1
1937824	14	342303	14	340417	1	1	NSG2	2090.93	2213.32	28679.1	29430.7	9.6884	10.9008	0.542027	0.542027	GTCGCTGGCCACG	GTCGCTGGCCACG	1	1	0	1	1	0	0
1937886	14	342241	14	340355	1	1	NSG2	806.427	1109.42	13721.1	19019	6.95068	6.95068	0	0	AGTTCCCCCCTCG	AGTTCCCCGCTCG	0	0	1	0	0	0	0
1938085	14	340203	14	338320	1	1	IGO1	1560.65	836.798	25251.4	14093.6	6.74158	8.83697	0.838181	0.838181	ATCGTTCAATACG	ATCGTTCAATACG	1	1	0	3	0	0	1
1938384	14	339495	14	337607	1	1	ASI2	1328.89	916.724	21926.5	14973	7.03474	10.8161	0	0	ATCTTCATATTCA	ATCTTCATACTCG	0	0	2	1	0	0	0
1938419	14	339460	14	337572	1	1	ASI2	1652.41	1283.41	28115	23173.6	8.04121	7.062	0.838181	0.921446	ATCATCAATGACG	ATCACGGATGACG	1	1	3	2	0	0	1
1940312	14	332225	14	330312	1	0	CBK1	1761.52	296.719	29713.9	5103.07	6.74326	6.74326	0	0	ATTTTAAAGCAAA	ATTTTAAAGCAAA	0	0	0	0	0	0	0
1940372	14	332281	14	330371	1	0	CBK1	2805.48	514.621	55374.3	9071.71	8.09647	10.7219	0	0	TT----AGTTGCA	TTCATTAGGTGCA	0	0	5	0	0	0	0
1942016	14	326581	14	324630	0	1	IBD2	585.617	889.496	10634.8	15870.2	8.11754	8.11754	0.816179	0.816179	ATCATAGAATACG	ATCATAGAATACG	1	1	0	4	0	0	1
1949178	14	295889	14	293906	1	1	NPR1	768.147	1244.86	12835.7	19786.3	9.06161	9.06161	0	0	ATGTTATTAAAAT	ATGCTCTTAAAAT	0	0	2	0	0	0	0
1949202	14	295865	14	293882	1	1	NPR1	1958.39	1247.63	31224.9	18241.5	9.06161	9.06161	0.816179	0.850744	ATCATCTATTACG	GTCATCTACTACG	1	1	2	3	0	0	1
1949271	14	295796	14	293816	1	1	NPR1	2819.35	2503.17	48911.2	44356.2	6.54434	6.72146	0.82875	0.82875	GTCATTGATAACG	GTCATTGATAACG	1	1	0	3	0	0	1
1951647	14	283712	14	281700	1	1	SRP1	2320.02	684.646	38768.9	12490.6	8.16642	8.16642	0	0	ATCGTTAGTGGAG	ATCACCACTAGAG	0	0	5	2	0	0	0
1951679	14	283744	14	281731	1	1	SRP1	2838.2	1382.88	42672.1	24927.2	8.16642	8.16642	0.838181	0.838181	ATCATTCTAGACG	ATCATTCAAGACG	1	1	1	4	0	0	1
1951713	14	283763	14	281765	0	1	SRP1	453.207	2111.69	6363.99	38326.8	5.58237	5.58237	0	0	AGAATGATATATG	TGAATGATATATA	0	0	2	1	0	0	0
1951858	14	283901	14	281910	0	1	SRP1	633.7	2303.29	15354.4	36475.8	9.06161	9.06283	0.877458	0.921446	ATCACCATTAACG	ATCACCATCGACG	1	1	2	6	0	0	1
1952122	14	281489	14	279495	0	1	YNL190W	98.8831	898.815	1493.39	12492.8	9.83373	10.8755	0	0	CTCTCTTTCAGTG	CTCTCTTTCAGGA	0	0	2	0	0	0	0
1954240	14	274182	14	272067	0	1	YNL194C	133.853	839.297	2084.31	12991	10.3477	6.26857	0.626866	0.582875	GTAGTTGCATACG	GTAATTGTATACG	1	1	2	1	0	0	0
1961776	14	255091	14	252906	1	1	RIO2	1103.29	1718.28	15805.9	26794.5	7.32858	10.8161	0	0	TCAAGTATG-TAG	CAAACTATACTA-	0	0	6	2	0	0	0
1961817	14	255127	14	252947	0	1	RIO2	567.028	2756.45	8201.98	48928.4	7.32858	6.26857	0.82875	0.806756	GTCATTTGTTACG	GTCATTTATTACG	1	1	1	4	0	0	1
1963999	14	251817	14	249640	1	1	SSB2	691.035	746.362	10819.6	10405.2	8.16642	8.16642	0.838181	0.838181	ATCATTCGAAACG	ATCATTCGAAACG	1	1	0	0	0	0	1
1965998	14	247333	14	244789	1	1	RRG9	1736.05	1561.33	28548.6	24040.7	9.06161	8.16642	0	0	GTAGTCAAGCACT	GTAATCGAGTGAG	0	0	6	0	0	0	0
1966025	14	247306	14	244762	1	1	RRG9	2213.2	1201.65	35938.2	19605	9.06161	10.8755	0	0	ATGTCCCTTAAGG	GTGTCCCTTAAGG	0	0	1	0	0	0	0
1966070	14	247264	14	244717	1	1	RRG9	3828.6	2268.91	65636.4	38561.4	7.55981	10.8755	0.816179	0.816179	ATCATTTTAGACG	ATCATTTTGTACG	1	1	2	3	0	0	1
1969007	14	228931	14	226349	1	0	SSU72	921.479	538.61	13867.2	10260.8	7.46334	7.46334	0	0	ATTCCCTAAAACT	ATTCCCTAAAACT	0	0	0	3	0	0	0
1969050	14	228974	14	226392	0	1	SSU72	290.453	775.149	5131.35	13041.7	7.46334	7.46334	0.838181	0.838181	ATCATCCTTTACG	ATCATCCTTTACG	1	1	0	2	0	0	1
1970958	14	218851	14	216224	0	1	ELA1	313.54	918.283	6125.57	15551	7.42842	7.91446	0	0	CGCC--AGATATA	CGCCGAAGAAAGA	0	0	4	4	0	0	0
1970998	14	218813	14	216184	1	1	ELA1	736.063	1057.64	10303	14636.1	8.08055	7.91446	0.597015	0.57502	GGCATTTGCCACG	GGCATTTGACACG	1	1	1	1	1	0	0
1971730	14	214700	14	212076	0	1	CSL4	18.8854	724.823	356.573	12827.9	6.6836	6.68629	0	0	ATCGCAAGAATCT	ATTGCAAGAAGTT	0	0	3	4	0	0	0
1971770	14	214725	14	212111	0	1	CSL4	11.501	947.221	228.874	14214.8	8.1719	7.1723	0	0	-----ACACATAA	TTAGTAAACGTAG	0	0	8	8	0	0	0
1974649	14	198513	14	195847	1	0	ZWF1	1264.43	20.6	20543	262.81	9.87881	6.31384	0.860175	0	ATCCTTTTCGACG	ATCTTTTTCGGCG	1	0	2	1	1	1	0
1974874	14	198343	14	195623	1	0	ZWF1	693.072	28.1068	12382.1	436.85	7.05378	5.41195	0	0	T-CCACTATTACG	TTCCACTATTGTG	0	0	3	1	0	0	0
1975782	14	187915	14	185216	1	1	SUI1	2234.37	2160.01	39080.4	37934.8	7.27987	8.22048	0.750982	0.750982	CTCCTATAGGACG	CTCCTATAGGACG	1	1	0	0	1	0	0
1975860	14	187837	14	185138	1	1	SUI1	1347.99	834.264	21982.3	14721.2	10.8755	10.8755	0.850744	0	GTCGTACAAAACG	GTCGTACAAAACT	1	0	1	4	1	1	0
1979653	14	167984	14	165220	1	1	GIS2	2888.87	1763.7	49499.4	29117	7.13264	7.13264	0.850744	0.872739	GTCATGATAGACG	GTCATGCTAGACG	1	1	1	0	0	0	1
1979708	14	167929	14	165165	1	1	GIS2	1132.32	800.27	16958.5	10832	6.54258	6.54258	0.850744	0.872739	GTCATGATAGACG	GTCATGCTAGACG	1	1	1	0	0	0	1
1980314	14	160544	14	157772	1	1	DSL1	1699.98	812.617	26047.1	17250.9	10.1896	10.1896	0	0	GTGCTCATTAACC	ATGCCCAGTAAGC	0	0	4	2	0	0	0
1980364	14	160495	14	157723	1	1	DSL1	1347.4	815.645	24060.4	15105.6	10.3478	10.3478	0.899452	0.899452	ATCGCTATTGACG	ATCGCTATTGACG	1	1	0	3	0	0	1
1980394	14	160465	14	157693	0	1	DSL1	512.197	983.346	8217.18	13770.4	6.37164	7.3221	0	0	ATGTTGAACTAAG	ATGTTGAAATCAG	0	0	2	3	0	0	0
1982549	14	140618	14	137907	1	1	PIK1	1824.24	2731.58	36382.1	37339.7	8.83697	5.9642	0.82875	0.806756	GTCATTATTCACG	GTCATTTTAAACG	1	1	3	3	0	0	1
1982598	14	140666	14	137956	1	1	PIK1	1202.43	965.263	18530.5	17931.4	8.83697	7.06681	0.82875	0.806756	GTCATTATTCACG	GTCATTTTAAACG	1	1	3	3	0	0	1
1983011	14	138033	14	135263	1	0	LYP1	820.262	178.321	13843.5	4974.25	5.58237	6.4268	0	0	CTTTTCC---CCA	CTGTTCCTTTCCG	0	0	5	3	0	0	0
1983104	14	138094	14	135346	1	0	LYP1	1537.31	458.257	22723.1	7907.52	6.70699	9.44754	0.806756	0.816179	GTCATTATATACG	ATCATTGTATACG	1	1	2	8	0	0	1
1992306	14	91617	14	93472	1	0	SEC21	1026.6	444.652	16297.9	8780.43	7.62607	7.91454	0	0	GCACT-TA--ACT	--ACTCTAGGACT	0	0	5	2	0	0	0
1992396	14	91705	14	93561	1	1	SEC21	903.528	764.807	12402.8	10390.3	9.49276	8.76001	0.850744	0.850744	GTCATTCACTACG	GTCATTCACTACG	1	1	0	2	0	0	1
1995877	14	76741	14	78601	1	1	MON2	2087.32	1900.43	29381.8	26769.6	10.0525	10.0525	0.894733	0.894733	GTCATCCACGACG	GTCATCCACGACG	1	1	0	0	0	0	1
1995935	14	76683	14	78543	1	1	MON2	1773.49	1642.46	24447.9	22400.2	8.66116	13.3884	0.894733	0.894733	GTCATCCACGACG	GTCATCCACGACG	1	1	0	0	0	0	1
1998879	14	58052	14	59881	1	1	MCK1	2350.36	2479.41	31440.9	33894.4	9.07399	9.07399	0	0	AGAGTAAATCAGG	AGAGTAAGTAAGG	0	0	2	1	0	0	0
1998924	14	58007	14	59836	1	1	MCK1	3052.68	3481.7	42678.1	55159.9	9.07399	9.07399	0.912016	0.899452	GTCACGAAGTACG	ATCACGAAGTACG	1	1	1	0	0	0	1
1999114	14	57846	14	59672	1	1	MCK1	1377.36	1403.82	21924.5	23257.9	7.91454	8.16642	0	0	ATCACACGTAGCT	AACTTACATAGTT	0	0	5	4	0	0	0
1999155	14	57805	14	59631	1	1	MCK1	956.322	1289.45	15957.9	19302.5	7.91454	8.16642	0.82875	0.794185	GTCATTACATACG	ATCATTAAATACG	1	1	2	0	0	0	1
2000566	14	48202	14	49982	1	1	EMW1	2161.93	2233.92	31044.4	31722.5	6.67946	6.67946	0	0	TTGCCACATTACT	TTGCCACACTACT	0	0	1	3	0	0	0
2000629	14	48140	14	49919	1	1	EMW1	3303.54	2887.68	53256.8	48213.2	9.44754	9.44754	0.899452	0.838181	ATCGCCATATACG	ATCGTCATATACG	1	1	1	3	0	0	1
2003388	14	34602	14	36362	1	1	KRE1	1917.4	1704.95	30092.5	26785.6	11.3052	11.3052	0	0	ATGTTTATTATCT	ATGTTTATTATCT	0	0	0	0	0	0	0
2003435	14	34555	14	36315	1	1	KRE1	1558.36	1349.22	26941.2	23121.1	11.3052	11.3052	0.890021	0.890021	GTCGCTTTATACG	GTCGCTTTATACG	1	1	0	1	0	0	1
2003580	14	34412	14	36170	1	1	KRE1	1660.17	2540.4	30728.8	40461.6	6.54181	6.54181	0	0	AGTATATGGCACA	AGTATATGGCACA	0	0	0	0	0	0	0
2003631	14	34361	14	36120	1	1	KRE1	1297.32	1792.77	21675.3	31549.8	9.06283	9.06283	0.899452	0.899452	ATCACCATACACG	ATCACCATACACG	1	1	0	0	0	0	1
2003656	14	34336	14	36095	1	1	KRE1	1141.4	1420.88	18879.4	23388.8	7.42488	7.42488	0	0	TTATGAAAAAACG	TTATGAAAAA-CG	0	0	1	2	0	0	0
2012759	14	662571	14	653547	1	1	ACC1	986.878	1103.73	17831.6	18008	9.07399	8.2127	0.956012	0.956012	GTCGCTGCGTACG	GTCGCTGCGTACG	1	1	0	6	0	0	1
2012831	14	662510	14	653485	0	1	ACC1	390.864	886.613	7228.86	12342.4	6.29847	6.38403	0	0.505106	TTTGTTT-GCACA	CTAGTTTAGCACG	0	1	4	5	0	0	0
2013429	14	661917	14	652902	0	1	ACC1	150.022	797.862	2432.06	11016.3	8.5041	8.5041	0.47604	0.688138	GTGCCAGAATACG	GTACCGGAATACG	1	1	2	2	0	0	0
2015711	14	668199	14	659156	1	1	YNR021W	915.198	1158.71	16730.8	17622	8.16642	10.7219	0.816179	0.860175	ATCATTTATGACG	ATCATGTACGACG	1	1	2	3	0	0	1
2015786	14	668273	14	659230	0	1	YNR021W	330.643	933.532	6996.04	16899.8	7.14086	7.14086	0	0	ATTGGCGAAAACG	TTTATC-AAAACG	0	0	4	1	0	0	0
2018229	14	694194	14	685146	1	1	ARC35	2327.7	4012.52	44316.1	61809.4	11.3052	11.3052	0	0	TTCTCAGTATACG	----CAGTATACG	0	0	4	0	0	0	0
2018268	14	694156	14	685107	1	1	ARC35	1784.65	4076.84	29793.4	70352	11.3052	11.3052	0.877458	0.877458	ATCGCTTTATACG	ATCGCTTTATACG	1	1	0	4	0	0	1
2018885	14	695512	14	686445	0	1	RSM19	660.564	886.017	10313	12391.5	5.60701	5.77343	0	0	ATCGCCAGTTATG	ATCGCCAGTTATG	0	0	0	1	0	0	0
2018965	14	695433	14	686365	0	1	RSM19	408.858	741.54	8191.93	12307.6	11.2505	7.51679	0.877458	0.816179	ATCACTATTCACG	ATCATTATTCACG	1	1	1	5	0	0	1
2020666	14	707614	14	698571	1	1	TRM112	1080.88	1172.61	17197.9	17015.5	7.01557	10.8161	0	0	CGCATTTCTGATA	CGCATTTCAGACA	0	0	2	1	0	0	0
2020725	14	707671	14	698627	1	1	TRM112	1076.38	1081.21	15473.4	15642.4	7.0594	8.28099	0.838181	0.838181	ATCATCTCATACG	ATCATGTCATACG	1	1	1	5	0	0	1
2021079	14	708350	14	699300	1	1	FPK1	1038.48	1075.11	15959.7	15885.2	8.13395	8.13395	0	0	GTCTTTGTTTTCC	GTCTTT----TCC	0	0	4	2	0	0	0
2021125	14	708396	14	699346	1	1	FPK1	1282.08	1197.32	21115.6	17591.5	8.13395	8.13395	0.965434	0.965434	ATCACGCGCGACG	ATCACGCGCGACG	1	1	0	0	0	0	1
2022032	14	713816	14	704764	1	1	MSO1	981.531	838.123	14692.4	14582.7	7.55439	11.2505	0	0	TTAGTCT-AAAAA	TTAGTTTGGAAAA	0	0	3	3	0	0	0
2022065	14	713785	14	704731	1	1	MSO1	1403.59	1215.62	21923.6	18836.9	7.55439	7.55439	0.684996	0.684996	CTCATTTAATACG	CTCATTTAATACG	1	1	0	1	1	0	0
2024420	14	720903	14	711895	1	1	POP2	719.554	1151.99	14191.7	16070.7	8.16642	6.58915	0.850744	0.850744	GTCATTCCAAACG	GTCATTCCAAACG	1	1	0	1	0	0	1
2024730	14	723339	14	714299	1	1	NOG2	675.885	720.94	9863.09	10624.9	7.06681	7.06681	0.850744	0.850744	GTCATTTAGCACG	GTCATTTAGCACG	1	1	0	1	0	0	1
2041474	14	779027	5	14962	1	1	AIF1	1192.79	1796.16	21740.9	28939.5	10.3477	9.89418	0.855456	0.890021	-TCACTAATAACG	GTCACTAAACACG	1	1	3	7	0	0	1
2041530	14	778976	5	15012	1	1	AIF1	728.042	1694.14	15350.7	28763.5	9.00721	10.1896	0.855456	0.890021	-TCACTAATAACG	GTCACTAAACACG	1	1	3	7	0	0	1
2045259	15	307759	15	299123	1	0	RCL1	775.998	335.807	11894.4	5638.45	6.57208	7.98357	0.582875	0.582875	GTAATTTTTCACG	GTAATTTTTCACG	1	1	0	3	1	0	0
2052705	15	274454	15	265556	1	0	MIM1	1101.8	465.872	16342.3	7764.42	9.06161	9.06161	0.855456	0.877458	ATCACTTATAACG	ATCACTTACAACG	1	1	1	3	0	0	1
2055386	15	259740	15	250852	1	1	SMC5	905.098	1188.86	15421.3	17817	6.96289	7.14065	0	0	TTATTTCAACA-A	TTATTTCAACAGA	0	0	1	7	0	0	0
2055425	15	259779	15	250891	1	1	SMC5	1498.78	3419.02	21198.4	51181.1	7.86731	10.3478	0.872739	0.872739	GTCATCCTGAACG	GTCATCCTGAACG	1	1	0	2	0	0	1
2055745	15	256191	15	247295	1	1	YOL036W	2870.15	917.11	44043.9	18446.5	9.00721	7.22164	0.653574	0	ATAACATAGCACG	ATAATATAGCATG	1	0	2	2	0	0	0
2055769	15	256210	15	247319	1	1	YOL036W	2476.19	1460.17	45186	28729.6	9.00721	7.55439	0.794185	0.850744	ATCATTTAATACG	GTCATCTCATACG	1	1	3	4	0	0	1
2055834	15	256272	15	247381	1	1	YOL036W	2165.67	2236.99	30283	31107.8	6.67946	6.67946	0	0	CTCATGTTTTTCG	CTGATGTTTTTCG	0	0	1	1	0	0	0
2057498	15	252823	15	243915	1	1	NOP12	834.777	978.079	11984.8	13657.2	11.2505	11.2505	0.855456	0.877458	ATCACTTAAAACG	ATCACTTGAAACG	1	1	1	0	0	0	1
2062408	15	234101	15	225123	1	1	SPE2	877.003	1701.05	12844.3	24890.4	6.22365	7.78372	0.645719	0	AGCCCTAGGAACG	AACCCTAGGAAGG	1	0	2	2	0	0	0
2062577	15	233936	15	224955	0	1	SPE2	507.317	1610.2	9151.52	26864.4	7.08608	7.91454	0.838181	0.82875	ATCATTGTGTACG	GTCATTATGTACG	1	1	2	3	0	0	1
2065961	15	218810	15	204310	1	1	ARG1	1822.8	965.389	28143.6	18024.6	9.89418	9.89418	0	0	GTAATTCTCCACA	GTAATTTTCCACA	0	0	1	0	0	0	0
2066004	15	218850	15	204350	1	1	ARG1	876.324	732.54	14712.1	13783.3	9.89418	9.89418	0.912016	0.912016	GTCACTACTGACG	GTCACTACTGACG	1	1	0	6	0	0	1
2070882	15	186938	15	172457	1	1	BRX1	2041.15	1204.43	28055.6	17777.8	6.23213	7.44017	0.921446	0.921446	ATCACTGTCCACG	ATCGCTTTCCACG	1	1	2	2	0	0	1
2070979	15	186844	15	172361	1	0	BRX1	1340.06	397.715	20925.2	8650.32	8.01976	8.01976	0	0	AGCATCTAAAATT	AGCATCTAAAATT	0	0	0	1	0	0	0
2073579	15	167937	15	153450	1	0	ATG19	976.905	182.053	15516.8	3669.76	5.12911	8.36088	0	0	TTTTCAGTTTACA	TTTTTACTCTACA	0	0	3	5	0	0	0
2073617	15	167951	15	153488	0	1	ATG19	83.4352	1182.86	1522.67	18169.9	11.3052	10.8755	0.838181	0	TTTAACAA-----	ATTTACAAAATCA	1	0	7	6	0	1	0
2073660	15	167979	15	153528	1	1	ATG19	722.355	1228.97	13890.1	19145.3	11.3052	10.8755	0.838181	0.82875	TTTAACAA-----	ATTTACAAAATCA	1	1	7	6	0	0	1
2075884	15	159077	15	144504	0	1	DUF1	429.314	688.294	5690.23	10870	7.39139	6.00461	0	0	ATCTCAAGATAAG	ATCTCAAGAAAAG	0	0	1	4	0	0	0
2081117	15	128892	15	114287	1	1	IZH4	948.768	1227.9	14616.9	18756.6	6.8447	6.8447	0.631579	0.631579	ATAACTTTTGACG	ATAACTTTTGACG	1	1	0	1	1	0	0
2081581	15	128468	15	113853	1	1	IZH4	2207.13	1429.26	37753.2	25265.2	6.77294	7.71295	0	0	CTTCTGTCAATCG	CTCTTGTTGATCG	0	0	4	0	0	0	0
2081630	15	128419	15	113804	1	1	IZH4	2767.28	2122.9	51305.7	40040.3	7.73473	9.00721	0	0	ATCATTTTTCTCT	ATCATTTTTCCCT	0	0	1	3	0	0	0
2081679	15	128376	15	113755	1	1	IZH4	2886.15	3119.93	50938.2	53403.5	7.73473	9.00721	0.653574	0.631579	ATAGCTATTGACG	ATAGCTATTAACG	1	1	1	5	1	0	0
2081830	15	128225	15	113606	1	0	IZH4	1020.4	662.637	17099.2	10910.4	10.3478	7.45247	0	0	ATCCTCCTTTTCT	ATCCTGCTTTTCT	0	0	1	2	0	0	0
2084062	15	123450	15	108850	0	1	ITR2	7.8088	1846.55	140.389	31456.3	6.23661	8.11754	0	0.877458	ATAATCGTAATAT	ATCATC-----AC	0	1	7	6	0	1	0
2084128	15	123508	15	108893	0	1	ITR2	8.82732	1911.8	193.098	27108.4	6.26389	10.3477	0	0.877458	ATAATCGTAATAT	ATCATC-----AC	0	1	7	6	0	1	0
2084336	15	123688	15	109055	0	1	ITR2	65.3986	1486.62	1091.87	23516	5.03185	5.679	0	0	AGGTTCCGGGATG	-GGTTCCGGAACG	0	0	3	4	0	0	0
2088541	15	99553	15	90139	1	1	MSN1	1783.29	1946.67	27125.4	29284	7.1384	7.1384	0	0	GGAATTCCAAAAT	GGAGGTTCAAAAT	0	0	3	1	0	0	0
2088597	15	99609	15	90195	1	1	MSN1	1713.86	2101.68	26834.6	28733.2	10.3477	10.3477	0.855456	0.855456	ATCACTATAAACG	ATCACTATAAACG	1	1	0	0	0	0	1
2094409	15	83449	15	74017	1	0	MDH2	903.358	599.26	14949.7	10240.5	9.70093	9.70093	0	0	TTTACCATTGAAG	TTTACCATTGAAC	0	0	1	4	0	0	0
2094449	15	83409	15	73977	0	1	MDH2	607.685	859.168	10214.1	14967.9	9.70093	9.70093	0.675569	0.675569	ATAGCGAAGTACG	ATAGCGAAGTACG	1	1	0	0	1	0	0
2094548	15	83310	15	73878	1	1	MDH2	956.576	1039.45	14291.6	15420.7	7.78372	7.78372	0.728987	0.728987	CTCATCATCTACG	CTCATCATCTACG	1	1	0	0	1	0	0
2098378	15	70233	15	60534	0	1	MED7	555.145	1073.57	9491.37	16643.3	6.81411	6.59455	0	0	GTAGCAACCAACA	ATAGTAGCTTATA	0	0	6	2	0	0	0
2114836	15	343484	15	334973	1	0	SLG1	768.614	41.1579	10505.6	596.298	9.80863	10.8755	0	0	TGCACGCCGTATG	TGTACGCCGTATG	0	0	1	1	0	0	0
2121349	15	371046	15	361029	0	1	HSP10	376.477	1560.68	6575.93	24261	7.91454	6.7557	0.838181	0.877458	ATCATTGATGACG	ATCACTAATGACG	1	1	2	2	0	0	1
2121409	15	370987	15	360969	0	1	HSP10	617.446	962.192	11185.5	18000.8	8.16642	10.3477	0.838181	0.877458	ATCATTGATGACG	ATCACTAATGACG	1	1	2	2	0	0	1
2122337	15	378084	15	368052	1	0	AHC1	1043.53	258.59	16927.2	4381.09	7.42202	8.76001	0	0	TATCTGGCGTACG	CATCTGGTGTACG	0	0	2	3	0	0	0
2122373	15	378048	15	368016	1	0	AHC1	1128.67	81.8462	15910.1	1626.47	9.39808	8.54068	0	0	GCTTTTATTGACG	GCTTTTATTGACG	0	0	0	1	0	0	0
2122400	15	378023	15	367992	1	0	AHC1	1292.99	187.597	20617.6	2878.47	9.39808	8.54068	0.921446	0.921446	ATCACGAACGACG	ATCACGAAGGACG	1	1	1	4	0	0	1
2123049	15	380805	15	370773	1	1	STI1	1084.66	1723.93	19424.9	25283.9	9.39237	9.39237	0.838181	0.838181	ATCATACTACACG	ATCATACTACACG	1	1	0	2	0	0	1
2124554	15	385101	15	375082	1	0	CIN5	784.953	12.3046	11112.2	206	8.08055	5.05484	0	0	CGACCCCTCTCCG	CGACCCCTCTCCG	0	0	0	3	0	0	0
2124595	15	385062	15	375042	1	0	CIN5	1677.96	5.26739	26556.8	103.15	8.08055	6.62205	0.899452	0	TCACA-TTCCACG	TCACACTTCCTCA	1	0	3	2	0	1	0
2126361	15	386446	15	376628	1	0	DFG16	1145.47	518.395	17900.1	9513.19	8.37958	11.3052	0.921446	0.899452	ATCACCGAAGACG	ATCACCGAAAACG	1	1	1	4	0	0	1
2127637	15	400257	15	390503	1	1	SHE4	1302.79	1709.47	26128.4	28637.8	9.05234	7.46334	0.860175	0.838181	ATCATGATCGACG	ATCATGATCAACG	1	1	1	2	0	0	1
2127693	15	400201	15	390447	1	1	SHE4	1509.01	1366.64	23010.3	20979.8	7.35343	7.46334	0.860175	0.838181	ATCATGATCGACG	ATCATGATCAACG	1	1	1	2	0	0	1
2129560	15	408240	15	398560	1	1	CUE5	1667.39	1358.11	23994.3	21375.7	7.01038	6.24585	0	0	TTTTTCTCACACT	ACTTTACAATACT	0	0	6	1	0	0	0
2129611	15	408291	15	398609	1	1	CUE5	2124.12	1613.48	35633.1	25988.2	6.25433	7.68371	0.872739	0.872739	GTCATCACAGACG	GTCATCATCGACG	1	1	2	3	0	0	1
2131528	15	413682	15	404022	1	1	TOM6	1316.84	2616.04	21476.3	42374.1	8.36088	7.06681	0	0	ATGTATACATACG	-------------	0	0	13	1	0	0	0
2131578	15	413731	15	404071	1	1	TOM6	1655.38	3334.79	29049	61827.4	11.3052	11.3052	0.868027	0.806756	GTCACTTTATACG	GTCATTTTATACG	1	1	1	3	0	0	1
2133908	15	422085	15	412541	0	1	RAT1	0	1800.78	0	31964.1	9.06283	7.01557	0	0	AGCCTATATCACC	GGGCTAAATCACC	0	0	3	2	0	0	0
2133965	15	422048	15	412489	0	1	RAT1	0	2870.61	0	45179.8	7.84015	6.77294	0	0.816179	-ATTTCGTGAAC-	CATTT--TGAACG	0	1	4	7	0	1	0
2136659	15	432038	15	422467	1	1	NOB1	1897.58	3409.37	32194.8	57283.6	11.2505	10.3477	0	0	TCTCAAGA-TGAG	CATCAAGAATG-G	0	0	4	1	0	0	0
2136695	15	432004	15	422433	1	1	NOB1	1141.1	2303.19	19953.2	41071.2	11.2505	10.3477	0.855456	0.868027	ATCACTATAAACG	-TCACTATATACG	1	1	2	5	0	0	1
2136860	15	431855	15	422286	1	1	NOB1	1024.95	862.69	13960.9	14166.7	5.45767	5.84089	0	0	G-GTTCTATTGAA	GCG-------GGA	0	0	9	3	0	0	0
2138355	15	436654	15	427053	0	1	ASE1	440.645	880.942	6900.85	15626.7	10.7219	7.60215	0	0	GATATGGCAGACA	AATGTGGCAGGT-	0	0	5	5	0	0	0
2138403	15	436606	15	427005	0	1	ASE1	379.236	774.378	6724.68	13149.7	10.7219	7.60215	0.899452	0.899452	ATCACACTGTACG	ATCACACTGTACG	1	1	0	3	0	0	1
2140093	15	444447	15	433550	1	1	YOR062C	1246.44	1658.73	22493.6	31395.4	10.8755	10.8755	0.838181	0.816179	ATCGTTTTGTACG	ATCATTTTGTACG	1	1	1	2	0	0	1
2140131	15	444412	15	433513	0	1	YOR062C	419.34	1138.98	7262	18968.2	6.20894	6.82211	0	0	ATATTACTGTCCG	GTATTACTTTCTA	0	0	4	1	0	0	0
2142297	15	448996	15	438088	0	1	MSA1	76.4752	927.903	1121.79	13041.6	6.82854	7.78372	0.475255	0.588374	CTAGCGCGTTACG	CTAGCGCGTTACG	1	1	0	1	1	0	0
2151777	15	487112	15	476248	1	1	TCB1	1115.09	1918.67	20114.8	30745.1	8.26826	7.42644	0	0	CATTA------TT	CAATATACTCGTT	0	0	7	5	0	0	0
2151824	15	487065	15	476201	0	1	TCB1	617.7	4535.82	10890.1	72040.4	9.06161	10.08	0.877458	0.890021	ATCACTTCTAACG	GTCACTTCTAACG	1	1	1	3	0	0	1
2151864	15	487025	15	476162	0	1	TCB1	552.769	1923.45	10066.2	28695.2	7.75551	7.75551	0	0.570306	ATAATTTTTCATG	ATAATTTTTCACG	0	1	1	0	0	1	0
2152074	15	491060	15	480383	1	1	VPS21	1615.06	2127.19	23638.3	30169.8	8.10111	6.98598	0.912016	0.850744	GTCACCTCATACG	GTCATCTCATACG	1	1	1	3	0	0	1
2152146	15	490988	15	480317	1	1	VPS21	1159.1	1674.03	16389.8	24231.9	6.22365	6.22365	0	0	AAAAAAAAACACG	AAT------CACG	0	0	7	0	0	0	0
2152458	15	493271	15	482601	1	1	PTC5	1048.5	1380.85	18357	22641.3	8.87506	9.78349	0.860175	0.894733	ATCATGTTCGACG	GTCATGTCCGACG	1	1	2	2	0	0	1
2152509	15	493223	15	482551	1	1	PTC5	863.295	1142.95	12993	19819.3	8.87506	9.78349	0.860175	0.894733	ATCATGTTCGACG	GTCATGTCCGACG	1	1	2	2	0	0	1
2152674	15	493062	15	482386	0	1	PTC5	276.957	1245.11	6548.77	21197.3	6.68546	10.3477	0	0	GTCGCCAATACCT	GTTGCCGCTTTTT	0	0	6	2	0	0	0
2153004	15	494548	15	483877	1	0	ECM3	902.721	640.394	14597.4	14199.5	7.22498	8.24355	0.688138	0.978006	ATCACGCAGCACG	GTCACGCGGCACG	1	1	2	3	0	1	0
2153070	15	494612	15	483943	0	1	ECM3	385.516	799.18	6223.48	12063.5	8.09605	9.70093	0	0	AGCATGGGCCGCG	GGCATGGGCCGTG	0	0	2	2	0	0	0
2153961	15	505627	15	494872	0	1	RKI1	196.578	1245.95	3512.55	20541.6	8.11348	8.11348	0	0	ATTCTAACGCAGT	ATTCTAACGTGCT	0	0	3	2	0	0	0
2154022	15	505566	15	494817	0	1	RKI1	128.718	1027.26	2110.2	17344.8	9.49276	9.37556	0.648861	0.670856	GTAGTCTACGACG	GTAGTCCACGACG	1	1	1	1	1	0	0
2154109	15	505489	15	494740	0	1	RKI1	539.273	882.477	8807	13921.5	4.95099	5.49799	0	0	TTCACCAATCACT	TGCACT--TCACT	0	0	4	10	0	0	0
2156086	15	511554	15	500816	1	1	NUP1	2870.66	1544.92	40471.2	24334.3	10.8755	10.8755	0	0	TGGGACAACCACG	TGGG-CGACCACA	0	0	3	3	0	0	0
2156135	15	511510	15	500772	1	1	NUP1	2347.77	1959.91	36383.2	30651.9	10.8755	10.8755	0	0.921446	ATCCACTTGTACG	ATCCCCTTGTACG	0	1	1	3	0	1	0
2156302	15	511347	15	500624	1	1	NUP1	1003.9	1110.17	15694.9	17156.3	7.73473	11.3052	0.868027	0.868027	GTCACATAATACG	GTCACATTATACG	1	1	1	4	0	0	1
2156859	15	514821	15	504038	1	1	CRC1	2388.17	2229.39	42607	42655.2	10.1896	10.1896	0	0	GTAGCAGCGTAGA	GTAGCAGCGTGGA	0	0	1	1	0	0	0
2156930	15	514752	15	503968	1	1	CRC1	3082.86	2894.91	48331.6	43945.6	7.1503	12.1345	0.688138	0.688138	GTAACGGCAAACG	GTAACGCCAAACG	1	1	1	1	1	0	0
2162587	15	533856	15	523188	1	1	AZF1	1167.92	1108.4	19224	17058.2	10.7476	10.7476	0	0	AGGATATATTCAG	AGGATGTATT-AG	0	0	2	2	0	0	0
2162627	15	533896	15	523228	1	0	AZF1	785.42	449.811	11726.6	7159.04	10.7476	10.7476	0.987429	0.987429	ATCGCGGGGCACG	ATCGCGGGGCACG	1	1	0	0	0	0	1
2164306	15	544537	15	533817	1	1	RPO31	731.649	1093.23	11858.7	14719.3	10.3477	7.96853	0.855456	0.912016	ATCACTATATACG	GTCACTCTGTACG	1	1	3	4	0	0	1
2164363	15	544481	15	533762	0	1	RPO31	296.776	967.478	5850.06	15233.2	8.83697	7.91446	0.860175	0.838181	ATCGTGTTTCACG	ATCGTGTTAAACG	1	1	2	2	0	0	1
2165681	15	553129	15	542388	0	1	PFY1	28.9434	768.154	720.191	12804.6	8.28099	7.42363	0	0	ATATATATAAACA	GTGTATACATA--	0	0	6	2	0	0	0
2165733	15	553077	15	542336	0	1	PFY1	273.987	1630.16	4514.92	24859	5.98733	7.32858	0	0	ATACTACAACATG	ATGTTACAACTTG	0	0	3	1	0	0	0
2165813	15	553000	15	542268	0	1	PFY1	307.344	757.685	4894.54	11865.6	6.68546	5.96543	0	0	ATGTCTTTGTACG	ATGTCTTTGTACG	0	0	0	2	0	0	0
2166082	15	554756	15	544008	0	1	LEO1	644.777	927.476	11677.9	13705.3	7.76753	8.16642	0	0	CTATTGCCATAAG	CTTTTGCCGTAAG	0	0	2	2	0	0	0
2166125	15	554714	15	543965	1	1	LEO1	797.515	743.46	12239	13196.3	7.76753	7.76753	0.934017	0.912016	GTCACCCGTAACG	GTCACCCATAACG	1	1	1	1	0	0	1
2172801	15	592692	15	581336	1	1	ARP8	849.715	791.74	14785.5	14065.4	9.80863	10.1896	0.872739	0.860175	GTCATCTTGCACG	ATCATCTTGCACG	1	1	1	0	0	0	1
2173547	15	605207	15	588169	1	0	ELG1	1001.86	531.531	18000.4	9387.97	7.62607	10.1896	0.921446	0.860175	ATCACCGCTAACG	ATCATCGCTAACG	1	1	1	0	0	0	1
2173863	15	606478	15	589456	1	1	PNO1	1732.07	760.22	31606.4	14219.9	8.36088	8.10111	0	0	ATCCCTCCATAGT	A-GCCTCCAGAGT	0	0	3	2	0	0	0
2173925	15	606418	15	589395	1	0	PNO1	1720.18	411.001	28860.5	6110.93	11.3052	11.3052	0	0	ACACAT-TTGACT	GCATATATTG-CT	0	0	4	0	0	0	0
2174038	15	606311	15	589285	0	1	PNO1	106.777	785.022	2087.83	12741.8	7.62607	7.62607	0.899452	0.877458	ATCACCTCTTACG	ATCACCTATAACG	1	1	2	2	0	0	1
2176179	15	617108	15	600082	0	1	RPB2	36.4552	886.553	1037.93	13147.1	7.42644	5.94118	0	0	TGCTTTTAAAACA	TGCTTTTACATCA	0	0	2	3	0	0	0
2176264	15	617037	15	599999	0	1	RPB2	482.617	777.966	8094.62	12614.5	6.77294	6.77294	0.816179	0.794185	ATCATTTTGAACG	ATCATTTTTAACG	1	1	1	1	0	0	1
2177086	15	619099	15	602071	0	1	ATG40	14.2595	1448.87	672.999	26231.7	9.06161	8.04121	0	0	ACAACACCACACG	ACAACACCACATG	0	0	1	2	0	0	0
2177127	15	619058	15	602055	0	1	ATG40	159.656	1839.91	4186.87	25190.9	12.1345	9.87881	0	0	ATCACTTCACACA	---ACTTCACTAT	0	0	6	7	0	0	0
2177169	15	619018	15	602014	0	1	ATG40	57.0805	3171.14	1393.74	46593	5.92682	9.87881	0	0.94344	ATAATAGAAAGCA	ATCACGGACGACG	0	1	7	1	0	1	0
2181421	15	642295	15	625228	1	1	YRR1	1165.42	1525.24	20836.3	26184.9	9.70093	8.04121	0.838181	0.838181	ATCATAGTGAACG	ATCATAGTGAACG	1	1	0	1	0	0	1
2181488	15	642229	15	625163	1	1	YRR1	874.881	1126.04	14202.5	16460.9	6.54181	6.68546	0	0	GGATTTAACTCCG	GGATTTAACTCCG	0	0	0	0	0	0	0
2182403	15	649187	15	632137	1	0	RPS28A	991.334	645.872	16351.5	11148.9	8.13063	10.1408	0.912016	0.912016	GTCACTCTAGACG	GTCACTCTACACG	1	1	1	1	0	0	1
2185501	15	671288	15	654332	0	1	GAC1	461.864	1732.11	6804.68	26433.7	6.2687	6.2687	0	0	CGCCTTTCCTTTG	CATCTTTCCTTTG	0	0	2	3	0	0	0
2185618	15	671177	15	654223	0	1	GAC1	91.244	1629.66	1509.51	21312.3	7.3221	10.3478	0.790259	0.877458	CTCGCTCAATACG	-TCGCTTAATACG	1	1	2	4	0	1	0
2188097	15	675810	15	658976	1	1	DCI1	868.133	1301.82	12527.3	19801.6	6.33498	7.0594	0	0	ATATTGAATGTAG	ATACTAAATGAAG	0	0	3	5	0	0	0
2188163	15	675744	15	658910	1	1	DCI1	1232.85	2595.21	20388.2	45341.8	8.22048	7.73704	0.816179	0.816179	ATCATTGAATACG	ATCATTGAATACG	1	1	0	2	0	0	1
2192826	15	692238	15	675510	0	1	ULS1	235.197	1271.02	3652.14	18538.6	6.84187	6.84187	0.645719	0.623723	AGCACGAGACACG	AGCACGAGATACG	1	1	1	3	1	0	0
2192900	15	692312	15	675578	0	1	ULS1	214.572	1406.33	3817.35	21720.5	7.40892	6.9455	0	0.741555	ATATTACCGGACA	ATACCGCCGGACG	0	1	4	1	0	0	0
2196868	15	712720	15	690131	0	1	TOA1	580.227	995.651	10052.7	17434.3	7.73473	7.84015	0	0.592302	-----AATTAACG	ATACTAATCAACG	0	1	6	1	0	0	0
2196920	15	712672	15	690080	0	1	TOA1	587.06	914.828	9651.37	15339.1	7.73473	7.84015	0.838181	0.899452	ATCATACTTGACG	ATCACACTTCACG	1	1	2	3	0	0	1
2197808	15	721870	15	699243	1	0	MRM1	685.221	538.291	11312	9371.62	10.1896	10.1896	0	0	ATATTCTTCGAAG	ATGTTCTTCGAAG	0	0	1	5	0	0	0
2198170	15	722714	15	700074	1	1	DED1	2674.68	1821.51	42349.6	30701.6	9.44754	9.44754	0.816179	0.877458	ATCATTCTATACG	ATCACCATATACG	1	1	3	4	0	0	1
2198228	15	722769	15	700132	1	1	DED1	1987.72	1130.42	32410.9	20002.1	7.1503	9.80863	0.850744	0.94344	GTCATTCTGAACG	ATCGCCTTGCACG	1	1	6	0	0	0	1
2198616	15	727338	15	704722	1	1	GEP3	812.071	1359.97	16297.8	22209.9	8.87506	8.11754	0.860175	0.882169	--CATCTTCGACG	ATCATCTCCGACG	1	1	3	5	0	0	1
2198915	15	733647	15	711007	1	1	RET1	853.874	1752.16	21978.5	27681	7.14086	7.14086	0	0	ACCTAACAATAAG	TACTAAGAA----	0	0	7	2	0	0	0
2198974	15	733589	15	710948	1	1	RET1	1470.73	2032.5	21976.8	33895.9	11.6091	9.49027	0.94344	0.904163	ATCACGTCGGACG	ATCATGCCCGACG	1	1	3	2	0	0	1
2200610	15	741884	15	719237	1	1	MGM1	1400.06	2554.61	20241	34491.1	8.1643	7.22498	0	0	ATTTCTGTCCATG	AATTTTGAGTATG	0	0	5	2	0	0	0
2200657	15	741837	15	719190	1	1	MGM1	1370.91	1977.29	24518.4	35122.1	8.1643	7.22498	0.838181	0.899452	ATCATCGAATACG	ATCACCGAATACG	1	1	1	1	0	0	1
2202032	15	745514	15	722883	0	1	SAS5	445.143	940.208	8022.26	15909.5	9.89418	9.89418	0	0	ATAACATATAAGC	ATAACATATAAAT	0	0	2	3	0	0	0
2202089	15	745458	15	722827	0	1	SAS5	466.618	1166.77	9344.74	19469.9	13.3884	13.3884	0.934017	0.934017	GTCGCGTTACACG	GTCGCGTTACACG	1	1	0	1	0	0	1
2204831	15	761444	15	738802	1	0	RPB8	923.601	498.156	17096.3	9721.54	9.89418	10.3477	0	0	GTCATAATACTAG	GTCATAATGCTAG	0	0	1	2	0	0	0
2204874	15	761401	15	738760	1	1	RPB8	837.62	1027.81	17136.9	19967.9	9.43675	8.16642	0.921446	0.838181	ATCACGTCTGACG	ATCATTACTGACG	1	1	3	3	0	0	1
2207433	15	772313	15	749663	0	1	MKK1	267.069	1947.86	5816.49	25555	9.89418	10.1896	0	0	GTATTGTTTAATT	CTATGCTTTGGTT	0	0	5	4	0	0	0
2207480	15	772357	15	749709	1	1	MKK1	783.552	2340.2	14551.2	38516.6	10.9008	9.89418	0.890021	0.890021	GTCACTATAC-AC	GTCACTA-ACAAC	1	1	2	4	0	0	1
2207890	15	774336	15	751687	1	1	MGE1	961.202	1900.77	17311	30393.4	9.06283	7.33247	0	0	CTGCTGATTAAAT	CTGCACGTTAAAT	0	0	3	2	0	0	0
2207929	15	774375	15	751726	0	1	MGE1	623.09	1523.77	9072.33	19540.1	9.06283	7.33247	0.877458	0.877458	ATCACTGAATACG	ATCACTGAATACG	1	1	0	3	0	0	1
2210030	15	780733	15	758125	0	1	DFR1	629.626	973.684	9062.69	13389.1	9.49027	9.00721	0.934017	0.877458	-TCGCTCTTGACG	ATCGCTTTTAACG	1	1	3	3	0	0	1
2210091	15	780789	15	758179	1	0	DFR1	842.67	363.36	13228.6	6323.36	7.73704	6.68629	0.485467	0	ATGCCATCTCACG	ATGCCATC---CG	1	0	3	3	0	0	0
2215293	15	807196	15	784438	1	1	SEC63	1091.45	670.313	14885	9891.92	8.26826	7.42488	0.470542	0	CGCTCTTATAACG	CCCTTTTATAACG	1	0	2	1	0	0	0
2215342	15	807147	15	784389	1	0	SEC63	737.888	471.585	10382.2	6539.39	11.6091	11.6091	0.912016	0.912016	GTCACTCGTTACG	GTCACTCATCACG	1	1	2	1	0	0	1
2216480	15	817164	15	794419	1	1	RPN8	1552.72	1117.95	25645.3	18541.5	9.06161	9.06161	0	0	CTCACAATGCAAT	TTAATAATGCAGT	0	0	4	3	0	0	0
2216518	15	817126	15	794381	1	1	RPN8	1506.67	1263.43	25941.9	22396.5	9.06161	9.06161	0.855456	0.855456	ATCACTTATTACG	ATCACTTAATACG	1	1	1	4	0	0	1
2218511	15	825768	15	802908	1	0	HRK1	759.659	76.0671	10122.9	1114.67	11.3052	11.3052	0.498036	0	GTCACAAGCCACG	GACACAAGCCACG	1	0	1	0	0	1	0
2220904	15	830915	15	808066	0	1	VPH1	441.409	780.928	6570.33	13018	8.28099	7.0609	0	0	CTAGTAATCCAGT	TTAATAATTCAGT	0	0	3	2	0	0	0
2223538	15	836977	15	814126	1	0	TPO4	792.507	81.5693	12669.5	1409.37	6.67946	8.11754	0.645719	0.562451	AGCACGCCATACG	AGCATGCTAAACG	1	1	3	1	1	1	0
2229192	15	860562	15	838531	1	0	SNF2	866.733	458.768	13801.5	7753.36	7.16361	6.31879	0	0	GGAATTTTGCAGG	GAAGTCTCACACG	0	0	6	3	0	0	0
2229277	15	860481	15	838446	1	0	SNF2	845.216	417.779	12939.4	7069.48	8.01976	9.06161	0.921446	0.912016	ATCGCGAACAACG	GTCACGAACAACG	1	1	2	4	0	0	1
2233029	15	882285	15	860517	1	0	CPA1	891.178	53.0351	13162.2	724.089	9.87881	9.87881	0.860175	0.921446	ATCATACACGACG	ATCACACACGACG	1	1	1	0	0	0	1
2233632	15	884227	15	862484	1	1	ISW2	1937.39	1657.46	34126.9	27264.6	10.7476	10.7476	0.614297	0	ATACTAAGCAACG	ATGTTAAGCAACG	1	0	2	5	0	0	0
2233673	15	884268	15	862525	1	1	ISW2	1741.1	1363.4	26343.7	21284.5	10.8755	10.7476	0.806756	0.82875	GTCATAATTAACG	GTCATAATCAACG	1	1	1	1	0	0	1
2236568	15	898545	15	876829	1	1	NOP58	682.76	808.842	12027.6	13774.6	8.16642	9.06283	0.838181	0.899452	ATCATTGTGTACG	ATCACTGTGTACG	1	1	1	2	0	0	1
2241128	15	909004	15	887396	0	1	FAA1	174.934	1843.71	3094.74	30442	7.42202	11.3052	0.794185	0.855456	ATCATATAATACG	ATCACATTATACG	1	1	2	2	0	0	1
2241170	15	909046	15	887438	0	1	FAA1	227.431	1389.25	4497.86	18866.8	7.03585	7.03585	0	0	ATCGCATATCAGG	ATCGCATATCAGG	0	0	0	0	0	0	0
2242961	15	921426	15	899861	1	1	LDB19	1634.33	985.628	27069.8	17182.2	10.3478	9.70093	0.877458	0.890021	ATCGCTATTAACG	GTCGCTATTAACG	1	1	1	2	0	0	1
2243006	15	921381	15	899817	1	1	LDB19	1159.48	724.329	18185	11619.1	10.3478	9.70093	0.877458	0.890021	ATCGCTATTAACG	GTCGCTATTAACG	1	1	1	2	0	0	1
2246119	15	943554	15	922018	0	1	MIP1	551.156	732.372	8187.3	10614.5	6.75527	6.75527	0	0	GTTGCAAGAAAAG	GTTGCAAGAAAAG	0	0	0	0	0	0	0
2246186	15	943487	15	921951	0	1	MIP1	501.587	680.679	7869.82	9947.53	6.18504	5.75508	0.978006	0.978006	GTCACCCGCCACG	GTCACCCGCCACG	1	1	0	0	0	0	1
2249456	15	968131	15	946569	1	0	YOR342C	1235.19	376.964	22467.9	6700.85	6.62205	6.62205	0	0	TTTCCTAAATAAG	TTTCCTGAATAAG	0	0	1	0	0	0	0
2251093	15	978615	15	951073	1	1	TYE7	2047.09	752.562	34443.8	12389.6	9.07399	9.07399	0.520031	0.520031	GTGCCCACGTACG	GTGCCCACGTACG	1	1	0	0	1	0	0
2251160	15	978549	15	951006	1	1	TYE7	1121.03	827.883	19061.3	13700.3	7.73704	7.73704	0.899452	0.899452	ATCCCATTGTACG	ATCCCATTGTACG	1	1	0	1	0	0	1
2258073	15	1003403	15	976940	1	0	MSC6	2064.83	599.796	27247.5	13467	8.87506	9.49027	0	0	ATGCCATAAAAGG	-TGCTATAAAGGG	0	0	3	4	0	0	0
2258139	15	1003337	15	976879	1	1	MSC6	2127.43	2082.96	30460.3	30722.5	9.44754	9.44754	0.816179	0.794185	ATCATCATATACG	ATCATTATATACG	1	1	1	3	0	0	1
2258164	15	1003313	15	976855	1	1	MSC6	969.351	1459.75	19238.7	20807.3	6.93902	6.72492	0.544383	0	CTAACTAAGGACG	CTAAGGAAAGCGG	1	0	5	3	0	0	0
2258948	15	1010024	15	983509	1	0	SNX3	1159.48	607.489	18631.6	9763.25	7.07764	5.14925	0	0	ATAGCAGCTAAGG	ATAGTAGCT----	0	0	5	0	0	0	0
2259140	15	1009847	15	983327	1	1	SNX3	1753.16	1082.06	29159.4	17445.3	9.43675	9.06283	0	0	AGAATTGCATAAG	AGAATGGTATGGA	0	0	5	1	0	0	0
2259175	15	1009813	15	983293	1	1	SNX3	1278.86	848.977	23068.8	14680.1	9.43675	9.06283	0.877458	0.877458	ATCACTTAGTACG	ATCACTTAGTACG	1	1	0	2	0	0	1
2260945	15	1015256	15	988734	1	1	PDE2	1366.24	987.632	22893	16173.3	10.8755	10.8755	0.570306	0.816179	ATAATTTTGTACG	ATCATTTTGTACG	1	1	1	1	0	1	0
2261039	15	1015162	15	988640	1	1	PDE2	794.162	668.862	12783.7	11403.7	5.2979	5.2979	0	0	GTCCTTTTCTAGT	GTCTTTTTTTAGT	0	0	2	0	0	0	0
2262899	15	1018927	15	992388	1	1	PRE10	1472.76	1201.1	20828.9	19022.8	9.00721	8.5041	0	0	ATGAGTTGGTAAG	GCGAGTTGGTAAG	0	0	2	4	0	0	0
2262941	15	1018886	15	992346	1	1	PRE10	744.169	985.098	11198.6	14221.4	9.00721	8.5041	0.877458	0.899452	ATCACGTTTAACG	ATCACTGCTAACG	1	1	3	3	0	0	1
2277809	16	554488	16	531171	1	1	SNF8	1531.63	1902.46	26876.8	29655.1	9.06161	9.06161	0	0	TATTTCT---ACT	TTTTGCTCAGACT	0	0	5	5	0	0	0
2277852	16	554445	16	531129	1	1	SNF8	1507.35	1991.64	22525.6	33707.1	9.06161	9.06161	0.855456	0.855456	ATCACTTATAACG	ATCACTTATAACG	1	1	0	3	0	0	1
2280513	16	529503	16	506205	1	1	MRPS16	1117.72	1609.35	19322.4	24910.5	8.16642	8.5041	0.860175	0.838181	ATCATTCAGGACG	ATCATTCAAGACG	1	1	1	2	0	0	1
2280564	16	529452	16	506155	1	1	MRPS16	709.878	1614.04	14025.5	26491.7	7.03474	9.07399	0.860175	0.838181	ATCATTCAGGACG	ATCATTCAAGACG	1	1	1	2	0	0	1
2281585	16	520477	16	497204	1	0	IRC15	739.416	304.244	11300.5	4474.93	9.43675	9.43675	0.899452	0.899452	ATCTCCGATTACG	ATCTCCGATTACG	1	1	0	3	0	0	1
2283858	16	497823	16	474575	1	1	ERG10	1795.26	758.769	27976.8	11077.1	12.1345	12.1345	0	0	ATGGCATCATACC	ATGGTACCATTCT	0	0	4	2	0	0	0
2283901	16	497866	16	474618	1	0	ERG10	874.414	475.57	14345.1	7956.89	12.1345	12.1345	0.868027	0.868027	GTCACTTATAACG	GTCACTTATAACG	1	1	0	1	0	0	1
2283932	16	497897	16	474649	1	0	ERG10	861.386	418.526	12102.2	5751.3	9.39808	6.93902	0.667714	0	AGCCCACCACACG	AACTCACCACATG	1	0	3	0	0	0	0
2284655	16	493353	16	470103	1	0	PHO85	808.21	408.442	12729.4	8918.28	6.5668	6.5668	0	0	ATTTTTAACAATG	A-TTTTAACCATG	0	0	2	1	0	0	0
2284867	16	493145	16	469892	1	0	PHO85	1285.22	387.541	19298.8	7253.98	7.01557	7.01557	0.899452	0.899452	ATCACCATACACG	ATCACCATACACG	1	1	0	0	0	0	1
2285111	16	491950	16	468695	1	1	SVL3	3827.83	676.393	52232.9	12110.8	8.16642	9.21923	0.890021	0	GTCTCATCTTACG	GTATCGTCTTACA	1	0	3	5	0	1	0
2285161	16	491906	16	468656	1	1	SVL3	2886.79	820.081	52031.4	15420.4	9.87881	9.21923	0.890021	0.978006	GTCTTCCGGAACG	GTCCCCCGGAACG	1	1	2	0	0	0	1
2285228	16	491839	16	468590	1	1	SVL3	900.048	817.457	13438.5	12160.2	6.49881	6.49881	0.894733	0.978006	GTCTTCCGGAACG	GTCCCCCGGAACG	1	1	2	0	0	0	1
2286590	16	482114	16	458892	1	1	EGD1	1308.23	1345.77	19625.6	19606.3	7.83518	8.71997	0.816179	0.816179	ATCATTTAGTACG	ATCATTCAATACG	1	1	2	4	0	0	1
2287734	16	475859	16	452640	0	1	MRX11	576.577	712.56	9878.07	11141.6	11.3052	11.3052	0.623723	0.623723	AGCGCGTTATACG	AGCGCGTTATACG	1	1	0	1	1	0	0
2289945	16	462315	16	439730	1	1	MNN9	2330.33	1115.97	36979.4	22057.7	10.6124	10.6124	0	0	AGTTTATCAAACT	-GTTTATCAA-CT	0	0	2	1	0	0	0
2289996	16	462269	16	439684	1	1	MNN9	1559.13	1422.92	23625.1	20851.9	10.6124	10.6124	0.47604	0.47604	GTCACTAGACACG	GTCACTAGACACG	1	1	0	3	1	0	0
2290061	16	462204	16	439629	1	1	MNN9	915.835	1343.55	16111.2	23155.3	6.67946	6.67946	0	0	ATCCGCTACAACG	ATCCGTTACAACG	0	0	1	0	0	0	0
2290647	16	458696	16	436116	0	1	KTR6	600.895	1166.62	10361.7	20181.2	5.89912	7.0609	0	0	ATCTTTCCATATT	ATCTATCCATATC	0	0	2	2	0	0	0
2290723	16	458624	16	436042	1	1	KTR6	719.469	1781.48	9658.24	22832.6	7.4034	7.4353	0.772976	0.750982	CTCGTGAGACACG	CTCGTGAAACACG	1	1	1	0	1	0	0
2296265	16	431801	16	416535	0	1	ALD6	318.59	1435.63	6387.8	27105.4	7.83518	7.07476	0	0	ATAATCCCGGGTG	ATAACTCCGGGTG	0	0	2	4	0	0	0
2296304	16	431839	16	416574	1	0	ALD6	1490.25	487.983	25790.3	8618.89	6.74483	7.07476	0.872739	0	GTCGTATGTGACG	GTCGTATGCGATG	1	0	2	0	0	1	0
2296363	16	431897	16	416633	1	1	ALD6	1834.51	889.111	28403.7	17976.5	7.0594	7.1384	0.872739	0	GTCGTATGTGACG	GTCGTATGCGATG	1	0	2	0	0	1	0
2296405	16	431936	16	416672	1	1	ALD6	841.609	1383.38	14483.9	22742.1	11.6091	7.1384	0.772976	0.772976	CTCATCAGCCACG	CTCATCAGCCACG	1	1	0	2	1	0	0
2296616	16	432146	16	416882	0	1	ALD6	289.901	1287.72	4874.76	21080.6	8.80749	8.80749	0.602514	0.602514	CGCGCCGCGGACG	CGCGCCGCGGACG	1	1	0	1	1	0	0
2296686	16	432214	16	416952	1	1	ALD6	1975.45	2343.83	29457.9	34803.3	10.8161	10.3478	0.816179	0.838181	ATCTTTTTACACG	ATCTTTTCACACG	1	1	1	0	0	0	1
2297856	16	426004	16	410762	0	1	HTC1	178.838	768.455	2729.38	12183.4	8.80749	8.80749	0	0.877458	ATCTATTTTTACG	ATCTCTACATACG	0	1	4	3	0	1	0
2300643	16	412037	16	396792	0	1	GCR1	411.532	1340.69	7507.68	25637.5	8.83697	9.06283	0.794185	0.877458	ATCATTTTTTACG	ATCACTTACTACG	1	1	3	4	0	0	1
2304426	16	386806	16	371454	1	1	ELP3	1207.56	1156.25	20968.1	21019.4	11.2505	10.3477	0	0	GGCATTTTCCACT	GGCATTTTCCATT	0	0	1	2	0	0	0
2304467	16	386765	16	371413	1	1	ELP3	1616.5	1772.72	27250.6	29512.1	11.2505	10.3477	0.855456	0.877458	ATCACTTATAACG	ATCACTAATGACG	1	1	2	4	0	0	1
2305720	16	381578	16	366257	0	1	RLM1	234.9	801.444	4354.16	15109	9.44754	9.87881	0.614297	0.584446	GGCTCTCTTAACG	AGCTTTCTCGACG	1	1	4	0	0	1	0
2308410	16	370761	16	355478	1	1	SEC62	749.092	694.284	10267	9652.22	9.49027	10.7219	0.904163	0.882169	ATCGTGTGCGACG	ATCGTGTACGACG	1	1	1	0	0	0	1
2311044	16	355574	16	340298	1	1	SYH1	828.326	681.468	12074.7	11289.8	6.63937	6.63937	0	0	ATGGCATTGAATG	GTGGTATTGAACG	0	0	3	1	0	0	0
2311084	16	355534	16	340258	0	1	SYH1	662.219	789.693	11636.7	11310.5	6.92455	6.63937	0.626866	0.648861	GTACTTTGGTACG	GTACTCTGGTACG	1	1	1	0	1	0	0
2311611	16	352559	16	337301	1	0	SSE1	708.987	233.126	12891.5	4238.8	6.77294	6.77294	0.816179	0.816179	ATCATTTGTTACG	ATCATTTGTTACG	1	1	0	0	0	0	1
2315999	16	339625	16	324394	0	1	PEX25	359.162	896.425	5747.35	11894.8	10.08	9.91254	0.987429	0.965434	ATCGCGGGCGACG	ATCGCGGGTCACG	1	1	2	1	0	0	1
2316102	16	339523	16	324293	1	0	PEX25	714.589	635.705	12445.6	12288.7	6.79103	5.68507	0	0	GGGGTTTATCAGT	GGGG-TTATCAGT	0	0	1	1	0	0	0
2316132	16	339495	16	324263	0	1	PEX25	576.407	1084.49	9890.3	15384.5	7.45247	7.71295	0.877458	0.921446	ATCACATCATACG	ATCACCTCACACG	1	1	2	4	0	0	1
2316185	16	339442	16	324210	1	1	PEX25	1158.63	1322.05	18393.5	22755.1	7.27776	6.25433	0.877458	0.921446	ATCACATCATACG	ATCACCTCACACG	1	1	2	4	0	0	1
2318573	16	326469	16	311234	1	0	DBP1	1124.8	405.926	18793	6828.49	9.06283	9.06283	0.899452	0.899452	ATCACTGTCAACG	ATCACCATTGACG	1	1	4	1	0	0	1
2318629	16	326415	16	311178	1	0	DBP1	1370.82	388.48	23426.5	5656.69	6.7557	6.7557	0.899452	0.899452	ATCACTGTCAACG	ATCACCATTGACG	1	1	4	1	0	0	1
2322529	16	313098	16	297889	1	1	KAP120	1670.32	954.812	22827	14903.6	7.51679	9.07399	0	0	GAAGCTTTTTACG	GAAGACTTTTACG	0	0	2	0	0	0	0
2322572	16	313141	16	297932	1	0	KAP120	1035.34	558.337	16209.6	8511.26	7.3221	9.07399	0.877458	0.899452	ATCTCTTCATACG	ATCTCTTCGTACG	1	1	1	0	0	0	1
2325248	16	305107	16	289869	1	0	TAF14	1316.84	465.914	20457.6	7695.68	8.5041	7.06681	0	0	TTATTTAAATAAG	CTATTTAAATAAG	0	0	1	2	0	0	0
2325304	16	305161	16	289924	1	0	TAF14	2270.66	494.34	33848.3	8625.41	8.5041	10.0525	0.899452	0.94344	ATCACTCAAGACG	ATCGCTCACGACG	1	1	2	2	0	0	1
2327069	16	297318	16	282095	1	1	GIP3	1092.59	2370.19	17678.5	42509.6	7.46334	7.46334	0	0	ATGATCATACATG	ATGATCATACATG	0	0	0	0	0	0	0
2327120	16	297267	16	282044	1	1	GIP3	1540.88	2322.24	22452.9	34809.4	8.13063	9.96482	0.921446	0.94344	ATCGCCTTTGACG	ATCGCCTCTGACG	1	1	1	0	0	0	1
2333109	16	277729	16	262442	1	1	NOP53	1121.88	707.528	17404.8	14989.3	7.73473	7.73473	0	0	ATATTATCAT---	AGGGCATCATACC	0	0	7	6	0	0	0
2333153	16	277685	16	262401	1	0	NOP53	1282.89	544.943	19813.2	8524.43	7.73473	7.73473	0.82875	0.850744	GTCATATTTGACG	GTCATACTTGACG	1	1	1	2	0	0	1
2334284	16	267696	16	252399	1	1	PRP46	1389.92	2079.74	25955.9	34836.5	6.24759	6.79103	0	0	AACTCGAAATAGG	AACTCGATA-AGG	0	0	2	5	0	0	0
2334335	16	267648	16	252348	1	1	PRP46	1245.46	2349.42	19149.8	35108.3	7.45247	7.45247	0.816179	0.816179	ATCATCTAATACG	ATCATCTAATACG	1	1	0	2	0	0	1
2336934	16	257251	16	241959	1	1	PRM4	1719.04	846.436	25183.3	11540.6	7.76753	10.3478	0	0	ATAATACCA----	ATAATAATAAATT	0	0	6	3	0	0	0
2336977	16	257210	16	241916	1	1	PRM4	2331.39	2437.01	37790.1	43430.4	7.76753	10.3478	0.872739	0.899452	ATCGTTATCCACG	ATCGCTATCAACG	1	1	2	2	0	0	1
2337066	16	257121	16	241829	1	1	PRM4	1445.39	1302.35	23767.8	21146.5	6.72492	6.72492	0	0	GGCGCAGTCTACA	GGCGCAGTCCACA	0	0	1	1	0	0	0
2338028	16	251942	16	236648	1	1	PET20	2480.35	2044.42	45161.8	42005	8.87506	9.06283	0	0	--GGTTCTTATGG	ATGGTTATTATGG	0	0	3	1	0	0	0
2338072	16	251898	16	236604	1	1	PET20	3132.3	2812.26	56730.2	52722.2	9.21923	8.10663	0.921446	0.965434	ATCACCATCGACG	ATCACCCCCGACG	1	1	2	4	0	0	1
2338464	16	246794	16	231513	1	1	BEM4	1948.63	1125.31	30380.8	16113	12.1345	11.3052	0	0	TGCGTGGGTGACT	TGCGTGGGTGACT	0	0	0	1	0	0	0
2338507	16	246751	16	231470	1	1	BEM4	3299.68	1454.97	58849.4	23135.6	12.1345	11.3052	0.746269	0.855456	CTCACTTTATACG	ATCACTTTATACG	1	1	1	2	0	1	0
2343512	16	214831	16	199500	1	0	CUP9	1152.86	117.032	17965.8	2024.54	9.87881	5.51929	0.645719	0	AGCACTACCGACG	AGCA-TACCGACC	1	0	2	0	0	0	0
2346350	16	207777	16	192854	1	1	PPQ1	1332.46	3075.11	22021	43997.2	9.44754	9.44754	0	0	GGAACATACTATG	CGAACATACGCTG	0	0	3	1	0	0	0
2346389	16	207803	16	192893	1	1	PPQ1	1123.36	1835.44	16919.8	26308.4	9.44754	9.44754	0.60487	0.60487	GTACTTCTATACG	GTACTTCTATACG	1	1	0	6	1	0	0
2346437	16	207849	16	192941	1	1	PPQ1	1646.51	1943.17	26999.2	30287	8.16642	6.62205	0.794185	0.816179	ATCATTTATTACG	ATCTTTTGATACG	1	1	3	2	0	0	1
2354370	16	163756	16	148813	1	0	PGC1	932.514	363.829	14285.7	5190.32	11.3052	11.3052	0.855456	0.855456	ATCTCTTTATACG	ATCTCTTTATACG	1	1	0	7	0	0	1
2355332	16	156400	16	141459	1	1	SRP72	1290.66	963.324	22807.6	15819	9.44754	9.37556	0	0	ATCACATA-ATAC	ATCACATACATAC	0	0	1	1	0	0	0
2355375	16	156357	16	141416	1	0	SRP72	893.3	409.869	14784.9	5845.84	9.44754	9.37556	0.877458	0.921446	ATCGCAATATACG	ATCGCAACACACG	1	1	2	2	0	0	1
2360430	16	128404	16	113473	0	1	MMT2	329.964	951.019	6253.99	15087.4	9.89418	8.87506	0.485467	0.498036	GGTCCGTGAAACG	GGCCCGTGAAACG	1	1	1	1	0	0	0
2360492	16	128344	16	113411	0	1	MMT2	585.32	923.786	10499.6	15882.4	6.31622	7.44017	0.485467	0.498036	GGTCCGTGAAACG	GGCCCGTGAAACG	1	1	1	1	0	0	0
2362598	16	118090	16	103131	1	0	CET1	1673.92	358.646	26949.1	6778.67	6.33498	6.79118	0	0	GGCATTATGTATG	GGGATTAAGGACG	0	0	4	4	0	0	0
2362625	16	118110	16	103157	1	1	CET1	840.633	1170.58	13157.1	18761.9	8.16642	9.06283	0	0	ATAACATATAACA	AT---AGATAGCA	0	0	5	5	0	0	0
2362660	16	118145	16	103190	1	0	CET1	2704.43	274.476	46091.8	5772.91	8.16642	9.06283	0.816179	0.877458	ATCATTTGTAACG	ATCACTCTTAACG	1	1	3	4	0	0	1
2362683	16	118156	16	103206	1	1	CET1	985.138	957.033	19047.1	17109	10.0525	7.03585	0.816179	0.877458	ATCATTTGTAACG	ATCACTCTTAACG	1	1	3	4	0	0	1
2362719	16	118190	16	103242	1	0	CET1	2583.56	294.95	34898	5075.14	10.0525	6.57208	0.653574	0	ATAACTTACGACG	ATAACTTACGCCA	1	0	2	1	1	0	0
2363714	16	114420	16	99433	1	1	USV1	2025.11	1320.33	31522.5	21358.2	6.0921	7.75551	0	0	ATAACAAAGTAAT	A-AACAA--TAAT	0	0	3	4	0	0	0
2363760	16	114465	16	99479	1	1	USV1	2918.62	1370.42	45519.2	25945.8	6.72492	10.8755	0.838181	0.838181	ATCATTGTGTACG	ATCGTAATGTACG	1	1	3	3	0	0	1
2365090	16	106837	16	91838	1	1	SSO1	4167.43	2624.15	76814	50155	12.1345	8.36088	0	0	ATCCTCCTCCAGG	CTCTTTCTCCAAA	0	0	5	2	0	0	0
2365132	16	106874	16	91877	1	1	SSO1	2462.74	3870.01	47040.3	59220.8	12.1345	8.36088	0.838181	0.890021	ATCATTTACCACG	GTCACTTAACACG	1	1	3	4	0	0	1
2367307	16	99300	16	84312	1	1	HSP82	1050.07	1297.43	16752.2	18475.3	9.06283	8.16642	0.899452	0.794185	ATCACCATGAACG	ATCATTATAAACG	1	1	3	3	0	0	1
2367356	16	99252	16	84264	1	1	HSP82	816.91	1015.81	12344.9	17291.8	9.06283	8.16642	0.899452	0.794185	ATCACCATGAACG	ATCATTATAAACG	1	1	3	3	0	0	1
2368415	16	95365	16	80408	1	0	IQG1	755.458	220.46	13028.4	4576.31	10.1896	4.89447	0.614297	0	ATATTGAGCTACG	ATATTGAACTACA	1	0	2	5	0	1	0
2368447	16	95339	16	80376	0	1	IQG1	335.863	960.314	5521.96	15815.9	10.3477	9.44754	0.614297	0.609584	ATATTGAGCTACG	ATATTGAACTACA	1	1	2	5	0	0	0
2368491	16	95299	16	80332	1	1	IQG1	966.083	799.927	13961.6	12465.1	10.3477	9.44754	0.855456	0.609584	ATCACTATATACG	ATAACTATATACG	1	1	1	1	0	1	0
2368795	16	88362	16	73419	1	0	HUT1	1759.23	411.278	28270.5	6887.14	5.12828	5.22182	0	0	ATTAGCATAAACG	ATTAGCATAAACG	0	0	0	1	0	0	0
2368854	16	88303	16	73360	1	0	HUT1	1978.98	559.806	30596.1	9214.96	9.43675	12.1345	0.899452	0.899452	ATCACGAACAACG	ATCACGAACAACG	1	1	0	2	0	0	1
2370801	16	75544	16	60564	0	1	ATG41	393.495	768.666	6375.28	11676.2	7.22225	10.0525	0.60487	0.626866	GTAATGAATGACG	GTAATGAACGACG	1	1	1	2	1	0	0
2370990	16	75363	16	60412	0	1	ATG41	50.4176	784.787	1045.66	10336.8	5.24031	7.60481	0	0	AGACTCAACCACA	AGACTCAACCACA	0	0	0	2	0	0	0
2372784	16	69102	16	54216	1	1	HFI1	858.415	1247.99	12611.2	17345.8	10.9008	10.9008	0.899452	0.899452	ATCACTCAACACG	ATCACTCAACACG	1	1	0	1	0	0	1
2372837	16	69155	16	54267	1	1	HFI1	736.318	836.353	12991.9	15691.9	10.9008	10.9008	0.899452	0.899452	ATCACTCAACACG	ATCACTCAACACG	1	1	0	1	0	0	1
2376531	16	52856	16	44466	1	1	APM1	3974.21	2943.21	70430.6	52500.1	10.1896	10.1896	0	0	CGCTTAGTTGAAG	-GCTTCGTTGGAA	0	0	4	2	0	0	0
2376575	16	52812	16	44422	1	1	APM1	3569.68	2518.91	55700.9	41771.4	10.1896	10.1896	0.899452	0.877458	ATCGCTATCAACG	ATCGCTATTAACG	1	1	1	1	0	0	1
2381052	16	30337	16	22067	1	1	MDL2	1876.49	1647.27	29322.5	25256.7	11.3052	11.3052	0	0	CTTTTTTTACTCG	C--TTTGTACTCG	0	0	3	1	0	0	0
2381096	16	30381	16	22111	1	1	MDL2	1992.13	1754.36	29852.5	26803.4	11.3052	11.3052	0.582875	0.570306	GTACTTTTATACG	ATACTTTTATACG	1	1	1	0	0	1	0
2381357	16	29987	16	21717	1	1	PBI1	2945.36	1780.03	40707.9	27567.2	7.13264	5.42179	0	0	ATATCTTGCTAAG	AAATCTTGCTAAG	0	0	1	1	0	0	0
2381426	16	29918	16	21649	1	1	PBI1	939.049	2524.01	29867.9	36115.2	11.3052	11.3052	0.570306	0.570306	ATACTTTTATACG	ATACTTTTATACG	1	1	0	3	1	0	0
2381447	16	29900	16	21631	1	1	PBI1	3062.66	829.55	42902.9	15489.1	7.29213	7.14086	0	0	ATTTTTTAATACT	ATTGTG-AATACT	0	0	3	1	0	0	0
2386262	16	565207	16	541302	1	1	AIM45	898.562	2134.12	16292.8	33601.8	10.7476	10.7476	0	0	GCG--AGCAGACT	GCGTAAGCAGACC	0	0	3	4	0	0	0
2386310	16	565159	16	541254	0	1	AIM45	524.377	2081.55	7803.36	32101.5	10.7476	10.7476	0.806756	0.82875	GTCATAATAAACG	GTCATACTAAACG	1	1	1	0	0	0	1
2386344	16	565133	16	541220	1	0	AIM45	837.832	492.973	13066.1	8250.51	6.57569	8.09605	0	0	AGGGCCTCGAACG	ACAACCTCGAAGG	0	0	4	2	0	0	0
2392620	16	581457	16	558073	1	0	RPA135	972.364	320.155	14043.6	9600.99	6.79103	6.79103	0	0	GGCGCTGAGAATC	GGCGTTAA-----	0	0	7	4	0	0	0
2392664	16	581425	16	558036	1	1	RPA135	726.217	2512.61	10746.5	37064.1	10.1896	10.1896	0.899452	0.921446	ATCGCTAATGACG	ATCGCTAACGACG	1	1	1	6	0	0	1
2392711	16	581382	16	557993	1	1	RPA135	1098.87	4906.53	20763.9	68232.4	10.1896	10.1896	0.899452	0.921446	ATCGCTAATGACG	ATCGCTAACGACG	1	1	1	6	0	0	1
2396677	16	593352	16	570018	1	1	TIF6	1072.35	1781.21	20602.5	25449.8	9.06161	9.89418	0	0	CAAGCTATAGAAG	CAAGCTGTGGAAG	0	0	2	2	0	0	0
2396711	16	593318	16	569984	1	1	TIF6	1561.08	1677.08	30062.2	32058.6	8.23736	8.23736	0.597015	0.597015	GGCATTCTGGACG	GGCATTCTGGACG	1	1	0	1	1	0	0
2397156	16	594210	16	570882	1	1	DSS4	1663.31	1165.63	23154.5	19918.8	9.91254	7.75551	0.636292	0	ATAGTGTCAGACG	TTAGTGCCA-ATG	1	0	4	1	0	0	0
2397335	16	594047	16	570716	1	1	DSS4	1060.68	2130.28	19259.9	36569.3	9.21923	9.07399	0.872739	0.882169	ATCGTTCAGTACG	ATCGTTCGGTACG	1	1	1	3	0	0	1
2397379	16	594009	16	570676	1	1	DSS4	1327.32	2417.4	22652.4	33024.9	7.03585	9.07399	0.860175	0.882169	ATCGTTCAGTACG	ATCGTTCGGTACG	1	1	1	3	0	0	1
2406674	16	639359	16	616653	0	1	HTS1	341.762	788.712	5042.65	13259.7	11.2505	8.10111	0	0	TTTCTTCGAAACG	TTTCTTCGAAACG	0	0	0	0	0	0	0
2406835	16	639200	16	616496	0	1	HTS1	611.887	775.534	10947.5	11527.9	10.8161	10.8161	0	0	ATTATAAGGAAAG	CTTATAAGGAAAG	0	0	1	2	0	0	0
2406877	16	639163	16	616458	0	1	HTS1	506.807	801.251	8813.24	13238	10.8161	10.8161	0.921446	0.860175	ATCGCCTTACACG	ATCGTCTTACACG	1	1	1	6	0	0	1
2408702	16	643624	16	620920	0	1	VMA13	212.408	751.906	4105.05	12244.1	5.58034	7.68371	0	0	CTGCAAAGCGACG	CTGCAAAGTGACG	0	0	1	2	0	0	0
2414063	16	678829	16	656067	1	0	YPR063C	895.21	539.525	16138.8	9690.94	8.76001	10.7476	0	0	GTTATGCTACACC	GTTATGCTTCACC	0	0	1	1	0	0	0
2424416	16	713197	16	690442	1	0	SRP54	722.992	587.443	13195.6	9866.33	9.89418	9.89418	0	0	CTCCTATACTTCA	CTCCTATACTGCA	0	0	1	1	0	0	0
2424439	16	713175	16	690419	0	1	SRP54	523.019	725.184	7948.88	10863.5	7.76753	7.51679	0.921446	0.921446	ATCACCGCTAACG	ATCACCGCTAACG	1	1	0	1	0	0	1
2427737	16	729697	16	707152	1	1	TMH18	1325.75	764.741	21453.7	11124.3	5.94118	6.34578	0	0	ATCAATCAATACG	ATTAATCAAAAGG	0	0	3	2	0	0	0
2427812	16	729622	16	707077	1	1	TMH18	1754.81	1622.25	27804.1	23478.1	7.01038	7.01038	0.899452	0.899452	ATCGCACTATACG	ATCGCACTATACG	1	1	0	3	0	0	1
2429107	16	736861	16	714289	1	0	FHL1	1800.73	652.572	33233.7	13715.3	8.16642	8.16642	0.838181	0.838181	ATCATTCTGAACG	ATCATTCTGAACG	1	1	0	2	0	0	1
2429171	16	736798	16	714225	1	1	FHL1	1323.38	790.205	24519.4	14905.8	8.1643	6.59528	0.838181	0.838181	ATCATTCTGAACG	ATCATTCTGAACG	1	1	0	2	0	0	1
2429988	16	742272	16	719700	1	1	YTH1	1287.94	1357.37	18571	19296.9	9.87881	9.87881	0	0	GGCAAACTTAACT	GGCAAACTTATCT	0	0	1	1	0	0	0
2430032	16	742228	16	719656	1	1	YTH1	1251.4	1860.45	24668.7	33656.7	9.87881	9.87881	0.860175	0.838181	ATCATAACCGACG	ATCATAATCGACG	1	1	1	1	0	0	1
2431504	16	746980	16	724438	0	1	RPC40	632.936	886.872	9817.81	13869.6	9.89418	6.8447	0.868027	0.816179	GTCACTATAAACG	ATCATTCTAAACG	1	1	3	3	0	0	1
2431815	16	752155	16	729598	1	1	MRD1	669.985	715.757	12062.1	12607.8	8.1719	6.5668	0	0	ACCACCTCTCATG	ACCACCTCTCATG	0	0	0	1	0	0	0
2431862	16	752108	16	729551	0	1	MRD1	501.842	925.17	6587.6	12026	8.1719	5.9263	0	0	AATCCTCGAGACG	AATCCTCGAGACG	0	0	0	3	0	0	0
2431926	16	752044	16	729487	1	1	MRD1	702.239	1356.51	10285.1	22022.4	11.6091	11.6091	0.978006	0.978006	GTCGCTCCGCACG	GTCGCTCCGCACG	1	1	0	0	0	0	1
2441064	16	789641	16	768165	0	1	YPR127W	28.0098	927.283	508.038	14658.6	8.23388	6.37164	0	0	ATATTGGCAAAGC	ACATTGCCAATGC	0	0	3	4	0	0	0
2441694	16	792591	16	771158	1	1	ANT1	1090.64	837.954	18850.4	14405.1	10.8161	9.80863	0	0	GTTCT-TTCTGAC	G-TCTATTCTGAC	0	0	2	2	0	0	0
2441748	16	792539	16	771105	1	1	ANT1	1677.53	832.855	24932.7	13877.8	10.8161	9.80863	0.912016	0.921446	GTCACCTTACACG	ATCACCTTGCACG	1	1	2	4	0	0	1
2441775	16	792515	16	771082	1	1	ANT1	829.684	752.953	14232.4	11844.2	7.51679	7.69029	0	0	ATGGTACTGGACT	GTGTTACTG---T	0	0	5	5	0	0	0
2444014	16	802107	16	780633	1	0	RRP9	2636.4	61.5653	43090.8	1750.84	9.21923	7.35254	0.540456	0	TTGA------ACG	TTGATGCACAACC	1	0	7	4	0	0	0
2444036	16	802129	16	780655	1	1	RRP9	1895.71	1072.12	34742.3	16873.2	9.21923	7.35254	0.838181	0.838181	ATCATGTTCAACG	ATCATGTTCAACG	1	1	0	2	0	0	1
2444089	16	802179	16	780708	1	0	RRP9	2051.04	641.652	27874.1	9174.39	6.89315	6.5668	0.838181	0.838181	ATCATGTTCAACG	ATCATGTTCAACG	1	1	0	2	0	0	1
2445941	16	822144	16	794925	0	1	NOC4	504.218	754.356	8374.88	12527.1	13.3884	9.80863	0.812253	0.834247	CTCACGTTGCACG	CTCGCCTTGCACG	1	1	2	2	0	0	0
2448521	16	828343	16	801117	1	1	YPR148C	1481	917.025	24079.4	13988.7	9.00721	9.00721	0.877458	0.877458	ATCGCTTTTAACG	ATCGCTTTTAACG	1	1	0	0	0	0	1
2448571	16	828295	16	801068	1	0	YPR148C	1245.88	619.156	22284.8	10575.3	10.1896	9.00721	0.877458	0.877458	ATCGCTTTTAACG	ATCGCTTTTAACG	1	1	0	0	0	0	1
2449217	16	834395	16	807091	1	1	PIN3	1410.29	1447.38	25710.4	26221.7	9.39808	8.72652	0.94344	0.94344	ATCACGCTGCACG	ATCACGCTGCACG	1	1	0	1	0	0	1
2449280	16	834458	16	807154	1	1	PIN3	1289.43	1047.49	19011.5	16193.7	6.71059	8.37356	0	0	CGAGCCTCCTTCG	CGAGCCTCCTTCG	0	0	0	1	0	0	0
2453122	16	856998	16	817474	1	0	KRE6	888.462	315.869	12361.1	6959.74	11.3052	10.8755	0.548311	0.631579	ATAATTTTATACG	ATAACTTTGTACG	1	1	2	6	1	1	0
2455299	16	866635	16	827122	1	1	SGV1	1828.49	932.189	27501.7	15616.4	7.24026	7.3221	0.94344	0.838181	ATCGCGTCGAACG	ATCGTATCAAACG	1	1	3	4	0	0	1
2455385	16	866551	16	827037	1	0	SGV1	1242.28	640.376	17991.6	9010.79	5.66652	5.98733	0	0	AATTCACAGAG-G	GATTTACAGAGTG	0	0	3	3	0	0	0
2456538	16	870169	16	830665	1	0	TIF3	824.209	473.547	13337.1	7927.21	8.08055	8.08055	0.94344	0.965434	ATCACGCACCACG	ATCACGCCCCACG	1	1	1	0	0	0	1
2456607	16	870100	16	830596	1	0	TIF3	784.741	622.419	9821.16	7551.15	10.1896	10.1896	0	0	AAATTTTTTTGCG	AAATTTTTTTGCG	0	0	0	0	0	0	0
2456794	16	874952	16	835456	0	1	RHO1	475.912	983.304	7864.51	15091.4	8.54068	8.54068	0	0	AGAACACAGTATA	AGAACACAATATA	0	0	1	6	0	0	0
2456818	16	874976	16	835480	1	1	RHO1	909.639	810.462	14615.8	13195.8	9.37556	9.37556	0	0	ATTTCCAA-TAAC	A-TGCCAAGTAAC	0	0	3	0	0	0	0
2456862	16	875020	16	835524	1	1	RHO1	1046.63	1262.47	19443	23231.1	9.37556	9.37556	0.956012	0.978006	GTCACGCTGCACG	GTCACGCCGCACG	1	1	1	0	0	0	1
2458172	16	883652	16	844078	1	1	BSP1	2643.49	3198.59	47045.1	57119.6	12.1345	12.1345	0	0	ATAATACCAAATG	ATAATACCGAATG	0	0	1	1	0	0	0
2458212	16	883688	16	844118	1	1	BSP1	1335.05	1408.74	23169.3	21912.3	12.1345	12.1345	0.912016	0.912016	GTCACATGGAACG	GTCACATGGAACG	1	1	0	0	0	0	1
2458503	16	885635	16	846067	1	1	YPR172W	819.668	1314.55	13127.3	20349.2	10.6124	10.6124	0.934017	0.912016	GTCACTTCCCACG	GTCACTTTGCACG	1	1	2	1	0	0	1
2458563	16	885695	16	846126	0	1	YPR172W	619.823	1133.95	8234.92	14979.5	5.94118	6.76402	0	0	AGCGCAAACGTGG	ATATCAAACGTGC	0	0	4	1	0	0	0
2459410	16	892234	16	852657	1	1	BET2	4187.16	4207.43	69795.7	69408.1	7.91454	13.3884	0.566378	0	CTAGCTCTCTACG	CTTGTTCTTTATG	1	0	4	0	0	0	0
2459454	16	892190	16	852613	1	1	BET2	4394.9	4424.78	67452.9	62998	10.3478	13.3884	0.82875	0.850744	GTCATTAAGTACG	GTCATTCAACACG	1	1	3	1	0	0	1
2460927	16	901657	16	862064	1	0	GDB1	894.361	327.276	13838.8	5395.02	7.86731	7.86731	0.816179	0.816179	ATCATTGTTAACG	ATCATTGTTAACG	1	1	0	2	0	0	1
2461704	16	911144	16	871523	0	1	PZF1	175.952	1295.76	3512.81	18618.8	9.44754	9.44754	0.816179	0.860175	ATCATACTATACG	ATCGTGCTATACG	1	1	2	2	0	0	1
2461757	16	911091	16	871471	0	1	PZF1	387.299	2124.84	7711.01	35064.8	9.44754	9.80863	0.816179	0.860175	ATCATACTATACG	ATCGTGCTATACG	1	1	2	2	0	0	1
2462245	16	919237	16	879619	1	0	RPC82	673.805	629.54	12706.3	11251.5	7.07476	7.07476	0	0	CTCTGAGGAAAGG	CTCTGAGGAAAGG	0	0	0	1	0	0	0
2462322	16	919160	16	879542	1	0	RPC82	759.702	593.138	11414.3	9427.17	7.46334	7.02209	0.860175	0.882169	ATCATTCCCAACG	ATCGTTCCCAACG	1	1	1	1	0	0	1
2470592	8	116057	8	104022	1	0	TIM10	778.884	513.423	13282.5	9887.73	7.46334	12.1345	0.860175	0.860175	ATCATCAGCTACG	ATCATTGGCTACG	1	1	2	2	0	0	1
2487793	8	387045	8	372935	1	1	RPC10	1667.09	3671.03	25249	55879.5	7.81424	10.7476	0.816179	0.816179	ATCATATTCTACG	-TCATATTTCACG	1	1	3	8	0	0	1
2487874	8	387125	8	372993	1	1	RPC10	848.994	3263.33	13755.9	54733	6.5668	5.47769	0	0.816179	GTCGTAGAATATG	CCCGTGAAATATG	0	1	4	7	0	1	0
2489484	3	75962	3	106323	1	0	FRM2	713.486	515.259	11482.7	8398.63	10.8161	8.16642	0.60487	0.60487	GTAATAGCATACG	GTAATAGCATATG	1	1	1	0	0	1	0
2492462	2	47294	2	67141	1	1	SCS22	3301.59	2887.68	53303	45864.4	10.7476	6.8447	0	0.82875	GTATTCATATACC	GTCTTCATATACG	0	1	2	2	0	1	0
2492504	2	47252	2	67101	1	1	SCS22	4178.17	3239.02	67452.9	49753.7	10.7476	6.8447	0.816179	0.816179	ATCATTCTAAACG	ATCATTCTAAACG	1	1	0	2	0	0	1
2493343	13	104510	13	109019	0	1	ATP18	504.261	825.006	10271.1	13643.6	9.80863	6.79103	0	0	GCCACTATGAACG	GCCACTATGAACG	0	0	0	3	0	0	0
2493367	13	104488	13	108997	1	0	ATP18	801.589	189.006	13862.6	3679.27	9.80863	6.62814	0.544383	0	ATCAT--TGCACG	A--ATGCTTCCCG	1	0	6	4	0	0	0
2493534	13	104321	13	108831	1	0	ATP18	1049.86	591.025	18012	10608.9	10.8161	9.05234	0.877458	0.899452	ATCACTCTTAACG	ATCACTCTTCACG	1	1	1	0	0	0	1
2493590	13	104266	13	108775	1	0	ATP18	822.342	616.212	13537	10264.6	5.77343	6.25957	0	0	GGAGATTTATCCG	GGAGATTTATCCG	0	0	0	1	0	0	0
2495671	4	1201962	4	1154548	1	0	SEM1	1181.33	538.141	19496.2	9556.08	6.29847	5.98733	0	0	CTAGTAGGTTACA	CT-GTGAGCAACA	0	0	5	3	0	0	0
2495723	4	1202008	4	1154594	1	1	SEM1	1817.66	896.636	26983.8	16222.8	8.4751	10.7219	0.794185	0.816179	ATCATTATTTACG	ATCATTATGTACG	1	1	1	5	0	0	1
2498045	4	1490588	4	1450597	1	0	SNA2	823.148	73.0391	12114.2	1243.35	7.39139	10.7476	0	0.514532	-ACACTATGCACG	CGCACTATGCACG	0	1	2	1	0	0	0
2498195	12	1014359	12	963345	0	1	LSM3	441.706	777.154	7027.82	11697.8	8.16642	7.4401	0	0	TTTCAGCAA-ACT	ATTCAGCAATA--	0	0	4	1	0	0	0
2498237	12	1014317	12	963303	0	1	LSM3	470.055	858.338	7326.17	14256.9	8.01976	8.01976	0.921446	0.899452	ATCACACAGCACG	ATCACATACCACG	1	1	2	1	0	0	1
2501859	9	321316	9	314438	1	1	VID28	1585.61	1411.41	23474.2	21031.6	8.16642	8.01976	0	0	ATGTCAGTTCGCG	ATGTCAGTTCGCG	0	0	0	2	0	0	0
2502033	9	321151	9	314273	1	1	VID28	2109.01	2089.42	38149	37334.4	9.06161	8.37958	0.675569	0.912016	ATCACTTATAACG	GTCACTTCCAACG	1	1	3	0	0	1	0
2502088	9	321096	9	314218	1	1	VID28	1595.67	1286.23	26103	21326.1	10.3477	10.3477	0.855456	0.912016	ATCACTTATAACG	GTCACTTCCAACG	1	1	3	0	0	0	1
2502476	4	228933	4	230060	0	1	STF1	130.585	1432.75	5693.97	18940.5	7.98357	8.72652	0	0	ATCTCAATTAATT	GTCTCGATT----	0	0	6	2	0	0	0
2502519	4	228974	4	230103	1	1	STF1	1961.66	1795.01	34759.7	30606.6	11.2505	10.3477	0.855456	0.626866	ATCACTATATACG	ATCACTACATACG	1	1	1	3	0	1	0
2502566	4	229018	4	230148	1	1	STF1	2281.65	1443.65	37691.5	23352.5	8.04121	7.51679	0.855456	0.877458	ATCACTATATACG	ATCACTACATACG	1	1	1	3	0	0	1
2509918	13	251665	13	244990	0	1	MRPL39	286.718	777.003	4523.79	13746.3	9.76467	8.16642	0	0	AATTTATCCCACT	AACTTATCCCACT	0	0	1	2	0	0	0
2509954	13	251630	13	244954	1	0	MRPL39	921.819	359.073	15349.2	6221.64	9.76467	6.86523	0.894733	0.978006	GTCGTTTGCCACG	GTCGCTCGCCACG	1	1	2	4	0	0	1
2510193	13	392668	13	376025	1	1	SAM37	2185.78	1487.58	36664.3	26688.7	7.1723	6.54181	0	0	CTCTTTCATCACA	TATTTTCACCACA	0	0	4	2	0	0	0
2510265	13	392603	13	375953	1	1	SAM37	2457.48	1888.54	39100.9	32913.7	8.16642	6.77294	0.794185	0.794185	ATCATTTTAAACG	ATCATTTTAAACG	1	1	0	5	0	0	1
2516863	16	582881	16	559396	1	1	MIN8	1266	1156.91	19071.2	17296.9	7.83518	5.95326	0.816179	0.838181	ATCATAAAGTACG	ATCATAAGGTACG	1	1	1	2	0	0	1
2517087	16	645298	16	622593	1	1	SPO24	1004.79	3165.81	18783.2	48731.9	10.8755	10.8755	0.483111	0	CTACTACTTTACG	CTATTACTTTACG	1	0	1	4	1	0	0
2517130	16	645341	16	622633	1	1	SPO24	1883.45	2344.47	28651.2	37156.6	10.8755	10.8755	0.60487	0.60487	GTAGTTTTGTACG	GTAGTTTTGTACG	1	1	0	0	1	0	0
2518082	16	883095	16	843524	1	1	YPR170W-B	1133.8	852.366	16839	12818.8	10.3478	10.8161	0	0	ATCCTGAACAGCA	ATCTTCAACA---	0	0	5	7	0	0	0
2518122	16	883135	16	843564	1	1	YPR170W-B	1273	1322.37	23077.4	24382.5	10.3478	10.8161	0.921446	0.899452	ATCGCTTTGCACG	ATCGCTTTACACG	1	1	1	0	0	0	1
2520853	2	164983	2	185013	0	1	YBL029C-A	464.326	1344.15	8047	21876	6.48377	8.1643	0	0	AAAAGCATTGTCG	AATAGCATTGTCG	0	0	1	1	0	0	0
2521192	2	356741	2	366906	1	1	TSC3	2476.7	1720.6	43196	28429.2	8.83697	7.89996	0.894733	0.894733	GTCATCTCGCACG	GTCATGTGGCACG	1	1	2	2	0	0	1
2521244	2	356689	2	366854	1	1	TSC3	1873.51	2217.69	28864.6	31351.4	9.00721	9.00721	0.894733	0.498036	GTCATCTCGCACG	GTCATGTGGCACG	1	1	2	2	0	1	0
2522777	2	625533	2	641250	1	0	MIN7	1161.3	88.6486	20797.9	1644.19	6.19424	5.79635	0	0	ATTTCCTTATAAG	ATTTCCTTATAGG	0	0	1	0	0	0	0
2522823	2	625488	2	641205	1	0	MIN7	1459.69	133.069	25059.3	2606.41	6.19424	6.7025	0	0	GCCTCGA-AAAAA	GCCTCGAGAAAAA	0	0	1	2	0	0	0
2523104	2	625216	2	640935	1	0	MIN7	861.513	432.901	13870.1	8254.06	10.0525	7.22164	0	0	CTCTCAGACAAAT	CTCTCTGACAACA	0	0	3	4	0	0	0
2523148	2	625173	2	640891	0	1	MIN7	350.122	1088.95	5559.56	15202.4	10.8755	10.8755	0.768264	0.768264	CTCACTGATTACG	CTCACTGATTACG	1	1	0	5	1	0	0
2524716	3	24698	3	55224	0	1	MIC10	338.409	876.295	5752.61	14387.2	11.3052	6.70963	0	0	ATAGGAAGGAATG	ATAGGAAGGAATG	0	0	0	2	0	0	0
2530688	4	477334	4	478764	0	1	HED1	0	723.607	0	12346.3	5.83166	7.68371	0	0.850744	GCCATTCAGAATG	GTCATTCACAACG	0	1	3	1	0	1	0
2530733	4	477379	4	478809	0	1	HED1	3.18293	1180.09	52.8791	17814.9	11.6091	7.68371	0	0.850744	GCCATTCAGAATG	GTCATTCACAACG	0	1	3	1	0	1	0
2532463	4	950455	4	919212	0	1	PRP28	92.0928	783.595	1666.88	13737	5.92958	7.11491	0	0.688138	GTACCCTCTTCCG	GTACCCTCTTACG	0	1	1	2	1	1	0
2532894	4	952557	4	921332	1	1	MNN10	1537.06	1970.3	21034.2	29472.5	8.92661	10.1896	0	0	ATGTTTTCCAAGG	ATACTTTCCAAGG	0	0	2	3	0	0	0
2532934	4	952586	4	921372	1	1	MNN10	918.339	1307.04	14918.4	19276.8	8.92661	7.51679	0.850744	0.816179	GTCGTCCATAATG	CTCGTCTATAATG	1	1	2	7	0	0	1
2534830	4	1224619	4	1171284	0	1	WIP1	209.522	1143.63	4012.91	17243.9	9.06283	9.06283	0.921446	0.921446	ATCACTCCTCACG	ATCACCTCACACG	1	1	3	3	0	0	1
2534894	4	1224681	4	1171348	0	1	WIP1	219.452	862.112	3846.51	12805.9	10.1896	7.75551	0	0	TT--CTGGGGAAA	TTAACTGGAGAAA	0	0	3	1	0	0	0
2536518	4	1385987	4	1340083	0	1	CMI8	509.269	1762.93	7781.71	22869.7	6.21672	8.11754	0	0	AT--TTGCAGATT	ATCATTACA--TT	0	0	5	1	0	0	0
2536555	4	1385950	4	1340051	1	1	CMI8	1183.71	2052.06	20030.3	31336.6	8.7433	7.3221	0.956012	0.912016	GTCGCCCCATACG	GTCGCTACATACG	1	1	2	3	0	0	1
2536631	4	1385874	4	1339975	1	1	CMI8	1278.94	2478.56	24629.9	40172.1	7.39139	7.39139	0.890021	0.921446	GTCACTGTATACG	ATCACTGTGCACG	1	1	3	1	0	0	1
2541474	8	241460	8	226730	1	1	NOP10	2431.76	2023.48	35117.1	33591.7	10.8161	8.11754	0.860175	0.882169	ATCCTTTAGCACG	ATCCTTTGGCACG	1	1	1	3	0	0	1
2541532	8	241517	8	226784	1	1	NOP10	1418.27	1252.3	25315.4	22674.8	8.04121	6.54196	0.860175	0.882169	ATCCTTTAGCACG	ATCCTTTGGCACG	1	1	1	3	0	0	1
2543737	9	173736	9	167817	1	1	YIL102C-A	3678.79	3763.36	50402.2	51888.2	13.3884	13.3884	0.636292	0.636292	ATAGTTTCGCACG	ATAGTTTGGCACG	1	1	1	0	1	0	0
2543776	9	173697	9	167778	1	1	YIL102C-A	2278.98	2161.82	36227.9	36152.8	13.3884	13.3884	0	0	ATGCTAGCGGAAA	ATGCTAGCGAAAA	0	0	1	0	0	0	0

## Sheet: REB1
locs	chr_cer	pos_cer	chr_par	pos_par	peak_cer	peak_par	gene	height_cer	height_par	sum_cer	sum_par	max_score_cer	max_score_par	max_PWMscore_cer	max_PWMscore_par	seq_cer	seq_par	motif_cer	motif_par	seqDistMotif	seqDistFlank	motif_com_alt	motif_uni_alt	motif_com_cons
5873	1	124672	1	114677	1	1	TPD3	1669.79	737.143	30337.3	12761.9	41.5523	41.5523	0.0465067	0.0465067	CGATAATACCCGGAATG	CGTCAATACCCGGAATG	0	0	0	2	1	0	0
5936	1	124734	1	114740	1	0	TPD3	913.478	190.583	14932.5	2679.55	10.602	6.15014	0.00129768	0.00166629	CTTAGTTCCCTAACACT	CTTAGTTCCCCAACACT	0	0	1	0	0	0	0
7537	1	119789	1	109791	1	1	PSK1	2303	1653.27	40344.4	30056.9	46.3069	46.3069	0.93458	0.93458	ATTTATTACCCGCCATG	TTATATTACCCGCCATG	1	1	0	2	0	0	1
7838	1	114687	1	104732	0	1	ATS1	342.215	685.948	5624.28	11543.9	51.0961	51.0961	0.0534458	0.0534458	CTGCGTTACCCCCGTCG	CTGCGTTACCCCCGTCG	1	1	0	0	1	0	0
11071	1	92644	1	82740	1	1	MYO4	1177.44	824.271	16419.8	11987.2	38.2066	38.2066	0.132343	0.132343	ATGGATAACCCGGAGAG	ATAGATAACCCGGACCA	1	1	0	4	1	0	0
11377	1	87186	1	77252	1	1	GIP4	1276.59	958.957	20981.2	16179	51.0961	51.0961	1	1	GTCTGTTACCCTGCAAT	-TTGGTTACCCTGGAAT	1	1	0	4	0	0	1
12853	1	70992	1	61127	1	0	CYC3	903.054	414.339	15781.5	8727.33	31.3451	31.3451	0.129291	0.129291	GGGCGCTACCCTGACCG	AGGCGCTACCCTGACGG	1	1	0	2	1	0	0
17969	1	45600	1	35833	1	0	ACS1	1417.78	79.0496	19820.3	4036.18	5.93408	5.93408	0.0935439	0.0935439	TAAAATTAACCTTGCTG	TAAAATTAACCTTGCTG	1	1	0	0	1	0	0
18001	1	45573	1	35801	1	0	ACS1	1376.18	244.99	23244.4	8367.86	46.3069	46.3069	0.93458	0.93458	GTTTATTACCCGACATT	GGTTATTACCCGAC-CT	1	1	0	3	0	0	1
18033	1	45541	1	35770	0	1	ACS1	398.245	570.039	6401.88	9096.64	46.3069	46.3069	0.93458	0.93458	GTTTATTACCCGACATT	GGTTATTACCCGAC-CT	1	1	0	3	0	0	1
19117	1	39081	1	29301	1	1	GPB2	1051.92	1038.87	16424.4	17989.9	46.3069	46.3069	0.93458	0.93458	AATACTTACCCGATGTT	CATGCTTACCCGATGTT	1	1	0	2	0	0	1
19164	1	39128	1	29348	0	1	GPB2	283.594	579.186	5585.66	8683.37	15.8448	15.8448	0.00658566	0.00658566	AAGAAAAACCCGTAATT	AAGAAAAACCCGTAATT	0	0	0	0	1	0	0
20786	1	33106	1	23331	0	1	BDH2	143.623	754.29	2493.02	11696	17.0242	17.0242	0.0935439	0.0935439	GATGATTAACCTAGGCA	GATGATTAACCTAGGCG	1	1	0	1	1	0	0
25152	1	169115	1	153317	1	0	BUD14	675.317	499.231	10143.5	8368.93	26.6005	26.6005	0.0566279	0.0566279	AAGGGTCACCCGAAGCT	AAGGGTCACCCGAAGCT	1	1	0	0	1	0	0
37756	2	227344	2	242058	1	1	UTP20	2329.79	864.546	38197.5	12053	5.07174	7.38437	5.24835e-05	0.00737155	CTCATTTAAAGCTAATG	CTCATTCA---CCCATG	0	0	4	2	0	0	0
37802	2	227390	2	242104	1	1	UTP20	2891.96	1338.44	49625	23046.7	38.2066	38.2066	0.0566279	0.00732148	TAATGTCACCCGGACTT	TAGTGCCACCCGGACGC	1	0	1	3	0	1	0
39478	2	203244	2	223931	1	1	SCT1	8451	4686.32	125128	63427.2	37.9012	37.9012	0.132343	0.132343	TCCTGTAACCCGGCTCT	TCTTGTAACCCGGCTCT	1	1	0	1	1	0	0
39852	2	201939	2	222642	1	1	RRN6	1901.74	2242.79	32008.9	39173.6	7.48552	7.06313	0.000489777	0.000366824	AGCGCTTACTCCTCTCC	AGCGCTTACAC----CC	0	0	2	3	0	0	0
39899	2	201896	2	222595	1	1	RRN6	2716.69	3588.44	47040.1	55332.1	51.0961	51.0961	1	0.0534458	ATGGGTTACCCTGTGGG	AGAGGTTACCCCGAGGG	1	1	1	3	0	1	0
41331	2	193751	2	213785	1	0	ACH1	604.534	436.344	11329.4	8188.67	15.1208	15.1208	0.00323838	0.00323838	ATGGATCACCCCTTGTG	ATGGATCACCCCTTGTA	0	0	0	1	1	0	0
41400	2	193820	2	213854	1	1	ACH1	801.079	863.722	14303.4	15774.1	16.6752	16.6752	0.0713724	0.0713724	GCGCATTGCCCGCCTTT	GCGCATTGCCCGCCTTT	1	1	0	0	1	0	0
49861	2	158633	2	178622	1	1	STU1	887.435	794.902	12892.4	12516.5	9.13416	9.13416	0.000129291	6.73188e-05	TTATGCTACACTTGTGT	TTATGCTACAGTTGTTT	0	0	1	1	0	0	0
49904	2	158591	2	178579	1	1	STU1	2221.26	2007.98	36188.3	32882.5	51.0961	51.0961	0.0534458	0.0534458	ATGCGTTACCCCGTCGG	GTACGTTACCCCGTCGG	1	1	0	2	1	0	0
50574	2	151336	2	171310	1	1	YBL036C	932.716	1580.66	12511.3	20824.6	46.3069	46.3069	0.93458	0.93458	CTTTATTACCCGGATAC	AACTATTACCCGGATAT	1	1	0	4	0	0	1
53191	2	135901	2	155689	1	1	ECM13	14681.5	13862.6	241172	238508	51.0961	51.0961	1	0.121659	ACATGTTACCCTACCC-	TCGTGTTACCC-ACCCT	1	1	1	3	0	1	0
53262	2	135966	2	155755	1	1	ECM13	6380.73	8855.69	106443	135742	4.82915	4.86992	0.000829886	0.000616909	CTTTTTCCCCCTGGT--	CTTTTT--------TTT	0	0	6	4	0	0	0
55144	2	132321	2	152109	1	1	EDE1	2635.72	2927.01	43973.4	50972.8	46.3069	46.3069	0.93458	0.93458	AATCATTACCCGTCGGC	GGTTATTACCCGTCGAT	1	1	0	5	0	0	1
55211	2	132261	2	152042	1	1	EDE1	1115.74	1238.5	14836.3	15927.5	9.13418	7.32181	0.000922021	0.000922021	TAGATTTCTCCTATAAT	TAGATTTCTCCTATAAT	0	0	0	0	1	0	0
56257	2	122211	2	142000	1	1	SAS3	826.323	706.408	12848.4	11492.3	51.0961	51.0961	0.93458	0.93458	TATTGTTACCCGACTTT	TATTGTTACCCGACTGA	1	1	0	2	0	0	1
56907	2	117080	2	136903	1	1	YBL055C	6980.75	2378.37	108223	38322.8	9.25214	7.89871	7.63683e-05	0.000130792	TAGCGCAAGTCTTCTGG	TAGCGCAGACCTCCTGG	0	0	3	1	0	0	0
56993	2	116994	2	136817	0	1	YBL055C	526.493	2958.1	7549.36	48888.9	37.9012	51.0961	0.132343	0.93458	CCGGGTTAC---TTAGA	CCGCGTTACCCGT--GA	1	1	3	3	0	1	0
57032	2	116959	2	136781	1	1	YBL055C	9266.86	566.169	163035	9343.97	37.9012	51.0961	0.132343	0.93458	CCGGGTTAC---TTAGA	CCGCGTTACCCGT--GA	1	1	3	3	0	1	0
58378	2	111280	2	131050	1	1	SHP1	1206.53	896.291	16870.5	16195.2	51.0961	46.3069	0.93458	0.93458	ATGTGTTACCCGCATTA	ACGTCTTACCCGCTCTA	1	1	0	4	0	0	1
58411	2	111313	2	131083	0	1	SHP1	503.729	659.027	9941.35	12829.6	51.0961	46.3069	0.93458	0.93458	ATGTGTTACCCGCATTA	ACGTCTTACCCGCTCTA	1	1	0	4	0	0	1
59611	2	101432	2	121209	1	1	PRX1	1630.09	1038.76	23500.4	19253.3	21.3438	21.3438	0.00737155	0.00737155	AAAGGTCACCCAGGACG	AAAGGTCACCCAGGACG	0	0	0	0	1	0	0
59706	2	101339	2	121116	1	1	PRX1	1638.36	1265.24	25714.4	24119.4	17.8849	29.3794	0.0128003	0.00427545	ATGGGTTCCCCGGCAAA	ATGGGTTTCCCGGCAAA	0	0	1	0	0	0	0
63728	2	84421	2	104244	1	1	ILS1	1007.56	1484.31	17035.2	24850.3	46.3069	46.3069	0.93458	0.93458	ATAGATTACCCGCCATC	ATGGATTACCCGCCATC	1	1	0	1	0	0	1
63794	2	84355	2	104183	0	1	ILS1	266.602	817.823	5840.8	15091.7	4.03216	5.10367	9.35439e-05	0.000244344	AGTCATCATTGTTTCGA	AGTCATCATCGTTTCGA	0	0	1	0	0	0	0
64125	2	80904	2	100728	0	1	ATG8	466.473	1165.57	8135.7	17976.9	38.2066	38.2066	0.0566279	0.0566279	TATCATCACCCGGAGGC	TATCATCACCCGGAGAC	1	1	0	1	1	0	0
65493	2	69668	2	89498	0	1	CDC27	485.605	993.117	8849.76	18290.3	46.3069	46.3069	0.93458	0.93458	CGTTATTACCCGCGCTT	TGTTATTACCCGCGCTC	1	1	0	2	0	0	1
65578	2	69586	2	89419	0	1	CDC27	136.707	548.935	3330.42	8555.82	6.61801	6.61801	0.00318007	0.0524835	TACTTTCAGCCTGTTCC	CACTTT-AGCCTACTGT	0	1	1	5	0	0	0
66654	2	62791	2	82651	1	1	YBL086C	3109.06	1491.66	52273.3	24026.5	46.3069	46.3069	0.93458	0.93458	GTTCTTTACCCGGAAAT	GTCCTTTACCCGGAAAT	1	1	0	1	0	0	1
66704	2	62741	2	82607	1	1	YBL086C	2756.6	1455.7	43939.9	23501.5	16.6304	16.6304	0.00362966	0.000107297	CGTTGTCACCGTACTTG	CACTGTCACTGAACTTG	0	0	2	2	0	0	0
71229	2	36496	2	56394	0	1	ATP1	172.142	623.351	2954.91	9786.38	5.74984	9.25214	6.78565e-06	0.000120833	TTTTGCTAGCA-TTCTT	TTTTTCTA-CACGTCTT	0	0	2	2	0	0	0
74763	2	18077	2	44468	1	1	PKC1	877.212	804.216	13679.8	12905.8	41.7646	41.7646	0.121659	0.121659	CTTCATTACCCAGCCCG	-TTCATTACCCAGCCCG	1	1	0	1	1	0	0
75550	2	10709	2	37105	1	0	MIX23	695.347	200.908	10956.4	3428.82	51.0961	51.0961	0.121659	0.121659	GCTTGTTACCCAGAA-T	GCTTGTTACCCAGAAGT	1	1	0	1	1	0	0
75991	2	241537	2	256409	1	1	NTH2	1769.63	1313.38	33376.2	25826	41.7646	41.7646	0.0534458	0.0534458	TCAAATTACCCCGCGCG	TCAAATTACCCCGCGCG	1	1	0	0	1	0	0
76068	2	241462	2	256332	1	0	NTH2	917.254	342.391	15507.7	7006.78	7.78159	7.53341	0.000449494	6.93556e-05	ATACATTAGTCGAATAT	ATATATCAATCAAAATT	0	0	3	3	0	0	0
76354	2	242719	2	257590	1	1	RER2	1542.88	1214.59	22541.6	18160.8	51.0961	51.0961	1	1	CCCTGTTACCCTCGCTC	CCCTGTTACCCTCGCTC	1	1	0	0	0	0	1
84202	2	273897	2	283327	1	1	KAP104	15583.3	19965.8	284932	376231	41.7646	41.7646	1	1	TGTTATTACCCTCTTTT	CGTTATTACCCTC-TCT	1	1	0	3	0	0	1
84258	2	273842	2	283274	1	1	KAP104	17830.3	19395.6	315898	249195	38.2066	38.2066	0.132343	0.132343	CTCTATAACCCGGATCA	CTCTATAACCCGGATCA	1	1	0	0	1	0	0
88646	2	288237	2	297652	1	0	CHS3	727.686	479.059	10891.8	7625.78	23.9194	23.9194	0.0101068	0.001	ACAGTTAGCCCGCA---	ACAATTAGCTCGCAGGG	0	0	1	4	0	0	0
91657	2	306152	2	315605	1	1	HMT1	1513.2	2582.06	27804.4	46370.2	41.7646	41.7646	1	1	ACATATTACCCTATAGG	ACATATTACCCTGTAGG	1	1	0	1	0	0	1
91736	2	306075	2	315529	1	1	HMT1	633.441	1364.11	10337.8	19508.1	10.1867	16.075	0.001	0.001	TATAATTTCCCTTTGTG	TACAGTTTCCCTTTGTG	0	0	0	2	1	0	0
93315	2	307113	2	316573	1	1	PDX3	969.713	1509.44	14329.5	22089.1	12.8262	23.0326	4.90501e-05	0.00222739	CTTAGCAGCCAGATAGA	CTCACCAACCCAATAGT	0	0	3	3	0	0	0
93360	2	307069	2	316528	1	1	PDX3	1702.7	2552.21	29257.2	43093.8	46.3069	46.3069	0.93458	0.93458	ACAATTTACCCGGCGCT	ACAATTTACCCGGGCCT	1	1	0	2	0	0	1
93588	2	310524	2	319977	1	1	CSG2	2006.46	2265	32356	36678.2	36.8576	36.8576	0.132343	0.132343	CGCTATAACCCGTTCTT	TGCTATAACCCGTTTTA	1	1	0	3	1	0	0
93614	2	310499	2	319954	1	1	CSG2	3204.25	3129.45	51101.2	47419.7	37.9012	37.9012	0.132343	0.132343	CGCTATAACCCGTTCTT	TGCTATAACCCGTTTTA	1	1	0	3	0	0	0
100078	2	337101	2	346854	1	1	REB1	33491.1	30573	614738	565140	51.0961	51.0961	0.93458	0.93458	CTTTGTTACCCGTCTTT	TTTTGTTACCCG-CATT	1	1	0	3	0	0	1
100143	2	337036	2	346790	1	1	REB1	16545.4	17364.2	240168	248432	37.9012	38.2066	0.129291	0.129291	GGGACCTACCCTCACAA	GGGACCTACCCTCACAA	1	1	0	0	1	0	0
100212	2	336967	2	346721	1	1	REB1	23658.6	26393.6	336556	375887	41.7646	41.7646	1	1	TGTTATTACCCTGCTGT	TTTTATTACCCTGCTGT	1	1	0	1	0	0	1
102637	2	340889	2	350685	1	0	YBR053C	3705.61	449.428	63361.7	14665.5	46.3069	46.3069	0.93458	0.93458	---GTTTACCCGGTCGG	AAGGATTACCC-GCCGG	1	1	1	5	0	0	1
102704	2	340828	2	350623	1	0	YBR053C	1466.61	439.56	26564.7	8061.93	6.32095	6.32095	0.0136963	0.0136963	TTGGCTTCCCCTTAAAG	CTTGCTTCCCCTTAAAT	0	0	0	3	1	0	0
108244	2	369899	2	380155	1	0	ECM2	4620.29	254.88	67970.1	4906.28	38.2066	9.77684	0.0171107	4.385e-05	AGTCACAACCCGGAGGG	-GTTAAGACTCGAAGGA	0	0	3	4	0	0	0
108287	2	369856	2	380114	1	1	ECM2	6308.94	1010.04	113331	18727.2	41.7646	41.7646	1	1	CGGGATTACCCTCTCCT	AGGGATTACCCTCTATT	1	1	0	3	0	0	1
111493	2	376292	2	386499	0	1	BAP2	57.9155	581.453	1118.44	10171.1	10.1185	51.0961	0.00161155	0.121659	GTTGGTTT---ATATGA	----GTTACCCATATGA	0	1	4	4	0	0	0
116607	2	392434	2	402496	1	1	SLM4	3514.54	2429.88	53094.6	37007.4	51.0961	26.6005	0.121659	0.0566279	ACCTGTTACCCAGAGGG	ACGTATCACCCGAAGAG	1	1	2	4	0	0	0
116657	2	392384	2	402447	1	1	SLM4	2611.63	1514.84	35771.4	21645.8	6.93558	6.93558	0.000129291	0.000129291	CTTATCTTCCCTTAATT	CTTATCTTCCCTTAATT	0	0	0	0	1	0	0
118900	2	405471	2	415530	1	0	SPT7	913.321	421.33	13671.9	7284.14	51.0961	51.0961	0.93458	0.93458	GAAAGTTACCCGTACCA	GTAAGTTACCCGTATTA	1	1	0	3	0	0	1
122436	2	427605	2	437597	1	1	TIM12	2077.13	1435.92	33871.3	24634.3	51.0961	41.7646	1	1	ACTCGTTACCCTACTAG	TCTCATTACCCTACTTG	1	1	0	3	0	0	1
122492	2	427550	2	437541	1	1	TIM12	1133.92	570.351	16937.5	7560.14	5.73893	11.0904	0.000187544	8.01941e-05	AATAGATATCGGAGCTC	AATAGGTCCCAGAGCTC	0	0	4	0	0	0	0
124383	2	435849	2	445846	1	1	RXT2	1156.62	663.498	17845.3	11776.3	41.5523	41.5523	0.120833	0.120833	GTTCGCTACCCGGCTTC	ACTCGCTACCCGGCGTC	1	1	0	3	1	0	0
124427	2	435805	2	445802	1	1	RXT2	2552.11	1569.7	39160.2	21653.9	41.5523	41.5523	0.120833	0.120833	GTTCGCTACCCGGCTTC	ACTCGCTACCCGGCGTC	1	1	0	3	0	0	0
128581	2	466936	2	477217	1	1	CYC8	777.282	831.946	13642.3	11766.5	51.0961	51.0961	1	1	ATCTGTTACCCTT-TTC	TTTTGTTACCCTTCTTT	1	1	0	4	0	0	1
135969	2	490679	2	500985	1	1	TPS1	2744.01	2676.09	42638.1	39901.2	23.9194	23.9194	0.00381212	0.00381212	GGCCCTCATCCGCAGGC	GCCCCTCATCCGCAGGC	0	0	0	1	1	0	0
136058	2	490590	2	500897	1	1	TPS1	1045.51	1349.16	15911.3	21217.2	6.26566	6.26566	0.000625453	0.000274766	GCAGTTTGTCCATGGCG	GCAGTTTGTCCCTGGCG	0	0	1	0	0	0	0
136340	2	493015	2	503337	1	1	VMA2	990.322	1079.61	12996.1	14478.7	46.3069	46.3069	0.93458	0.93458	GGTTCTTACCCGAATGC	GGTTCTTACCCGAATGC	1	1	0	0	0	0	1
136377	2	492978	2	503300	1	1	VMA2	2303.94	2556.33	37748.8	41433.5	46.3069	46.3069	0.93458	0.93458	GGTTCTTACCCGAATGC	GGTTCTTACCCGAATGC	1	1	0	0	0	0	1
137323	2	497047	2	507382	1	1	SHE3	3531.12	2311.81	64590	42495.5	51.0961	51.0961	0.93458	0.93458	AATAGTTACCCGCTCGT	AATAGTTACCCGCGTGT	1	1	0	2	0	0	1
137379	2	496991	2	507328	1	1	SHE3	1815.1	1166.51	29793.2	18348.3	12.755	12.755	0.00432458	0.00432458	AGCTCTCGCCCGAACAA	AGCTTTCGCCCGAACAA	0	0	0	1	1	0	0
137989	2	504681	2	514998	0	1	HSL7	23.2346	595.651	2415.43	8795.08	36.8576	46.3069	0.132343	0.93458	TTTTATAACCCGCCTTT	CTTCATTACCCGCCTTT	1	1	1	2	0	1	0
139509	2	527050	2	537369	1	1	IRA1	959.888	2151.79	15651.3	34692.9	41.7646	41.7646	1	1	TGGTATTACCCTCTAAG	TGGCATTACCCTCTAGA	1	1	0	3	0	0	1
141474	2	532404	2	542713	1	0	SUP45	668.059	271.16	10627.7	4590.52	46.3069	51.0961	0.93458	0.93458	CTTTATTACCCGGATTA	CTTTGTTACCCGAATTA	1	1	0	2	0	0	1
144179	2	536306	2	546632	1	0	RTC2	606.776	53.9024	9493.34	1168.9	35.6684	16.6898	0.0566279	0.00732148	TCCTCTCACCCGCAAAG	TCCTTCCACCCGCGAAC	1	0	1	3	0	1	0
151201	2	561093	2	571409	1	0	CSH1	909.025	413.812	13556.7	6996.19	51.0961	36.8576	0.121659	0.132343	TGGAGTTACCCATCATA	TGCTGTAACCCGTCATA	1	1	2	2	0	0	0
151314	2	561204	2	571518	1	0	CSH1	568.301	114.875	9074.61	1796.49	11.6662	9.12079	0.0072878	0.000591471	CGTATTTACCGAGGTCG	CGTA-CTGCCGTGGTCG	0	0	3	1	0	0	0
152330	2	565513	2	575874	1	1	EXO5	1030.99	773.1	18471.7	13502.5	46.3069	46.3069	0.93458	0.93458	CAGTATTACCCGCGTTG	CAGTATTACCCGCATCG	1	1	0	2	0	0	1
152633	2	568692	2	579111	1	1	ARL1	1659.38	2311.48	30507.1	40900.5	6.83301	6.12867	0.0935439	0.0935439	A-TATTTAACCTACTCT	AGTATTTAACCTGCTCT	1	1	0	2	1	0	0
152693	2	568636	2	579055	1	1	ARL1	2813.08	4375.66	45309.5	67594.4	51.0961	51.0961	0.93458	0.93458	CTCTGTTACCCGTCCTG	CTTTGTTACCCGTCCTG	1	1	0	1	0	0	1
154143	2	578262	2	588699	1	1	NPL4	571.3	712.501	8316.12	10519.5	6.08321	6.14421	0.000427937	0.000427937	AACTTTTGACGTTTTTT	AACTTTTGACGTATCTC	0	0	0	3	0	0	0
154204	2	578202	2	588638	1	1	NPL4	1650.43	1481.1	29244.1	23395.1	46.3069	46.3069	0.93458	0.93458	TCTTATTACCCGCCAAA	TCTCATTACCCGCCGAG	1	1	0	3	0	0	1
154470	2	581651	2	592078	1	1	SMY2	1011.91	633.77	16294.5	10252.4	10.4533	8.44811	0.000110833	0.000110833	CTAATCTAATCTTTTCA	CTAATCTAATCTTTTCG	0	0	0	1	0	0	0
154504	2	581617	2	592046	1	1	SMY2	2441.77	1910.32	39108.4	29701.7	41.7646	41.7646	1	1	CGCAATTACCCTATGCC	CGCAATTACCCTATGCC	1	1	0	0	0	0	1
154581	2	581545	2	591977	1	1	SMY2	928.871	697.441	14521.9	11215.6	5.95015	5.95015	0.00566799	0.00566799	TCAAATCAACCTATAAG	TCAAATCAACCTATAAA	0	0	0	1	1	0	0
154814	2	582278	2	592700	1	1	UMP1	1082.12	1063.88	16732.7	17764	51.0961	41.5523	0.93458	0.120833	CATGGTTACCCGAGGAG	GGTAGTCACCCGGAGAG	1	1	1	5	0	1	0
157162	2	589380	2	599803	1	1	FZO1	955.982	782.663	14499.3	13186.3	10.4533	10.4533	0.00121279	0.0935439	AGGGATCACAAGGAATT	AGGGATTAACCTGAAAT	0	1	5	1	0	0	0
157225	2	589317	2	599740	0	1	FZO1	305.94	926.951	4969.83	14370.2	46.3069	46.3069	0.93458	0.93458	TGTATTTACCCGGACTG	TATATTTACCCGGACTG	1	1	0	1	0	0	1
157259	2	589283	2	599706	1	1	FZO1	1450.56	1711	26554	28360.5	46.3069	46.3069	0.93458	0.93458	TGTATTTACCCGGACTG	TATATTTACCCGGACTG	1	1	0	1	0	0	1
158045	2	595724	2	610532	1	0	YPC1	2148.53	11.6188	35467.6	561.263	51.0961	13.1977	1	0.00280502	-----CCCTTCTGACCA	CCCGCCCCGCC---CCA	1	0	3	7	0	1	0
158236	2	595887	2	610715	0	1	YPC1	216.996	757.254	4072.63	12257	11.3895	11.3895	0.00792778	0.00792778	ATATATAACCGGAGACA	ATATATAACCGGAGACA	0	0	0	0	1	0	0
158275	2	595926	2	610754	1	1	YPC1	1040.36	657.546	15687.5	9199.23	30.9576	30.9576	0.120833	0.120833	AAATGCTACCCGAATTC	AAGTGCTACCCGAATTC	1	1	0	1	1	0	0
158308	2	595958	2	610786	1	1	YPC1	1342.43	1561.7	19149.5	21006	30.9576	30.9576	0.120833	0.120833	AAATGCTACCCGAATTC	AAGTGCTACCCGAATTC	1	1	0	1	0	0	0
165837	2	620676	2	636271	1	1	BEM1	1052.25	1199.89	16948.3	19124.9	41.7646	41.7646	1	1	TAATATTACCCTAAACG	TAATATTACCCTAAACG	1	1	0	0	0	0	1
165888	2	620727	2	636322	1	1	BEM1	582.745	586.129	8502.6	8813.44	7.91603	7.91603	0.0048047	0.0048047	GCCATTTGTCCGTTTAG	GCCATTTGTCCGTTTAG	0	0	0	0	1	0	0
174147	2	662818	2	679333	0	1	PYC2	6.86771	627.707	121.329	9412.48	5.70056	19.1351	0.00359791	0.000922021	TCACATTATCCCAGTTT	TCA-----------TTT	0	0	7	4	0	0	0
174214	2	662755	2	679268	0	1	PYC2	68.6907	1164.27	1305.12	18009.4	5.3411	14.6407	0.00147139	0.001	AA--ACTAACCACGATT	AAGGAATATCGAATATT	0	0	3	4	0	0	0
178102	2	679361	2	695874	0	1	ROT2	472.026	628.823	7194.49	9353.73	46.3069	46.3069	0.93458	0.93458	T-GTTTTACCCGGACCA	TATTTTTACCCGCACTG	1	1	0	5	0	0	1
179071	2	686746	2	703275	1	1	ARC40	889.183	1153	14703.9	18808.6	26.6005	26.6005	0.0566279	0.0566279	TCTTGTCACCCGCCCGC	TCTTGTCACCCGCCCGC	1	1	0	0	1	0	0
179117	2	686700	2	703230	0	1	ARC40	516.005	800.995	7546.73	11264	26.6005	26.6005	0.0566279	0.0566279	TCTTGTCACCCGCCCGC	TCTTGTCACCCGCCCGC	1	1	0	0	0	0	0
179396	2	691812	2	708327	1	1	ABD1	829.993	1120.16	13930.7	17167.7	46.3069	46.3069	0.93458	0.93458	TACCATTACCCGGATTA	TACCATTACCCGGATTC	1	1	0	1	0	0	1
187049	2	723099	2	739518	1	1	SRB6	749.787	571.107	12783.3	9892.28	42.3227	42.3227	0.0673188	0.00403263	TGGATTTATCCTGATTT	TCAGTTTATCGTGATAT	1	0	1	4	0	1	0
187596	2	728798	2	745210	0	1	RIB5	77.1972	545.766	1514.55	7956.93	4.72143	6.4576	0.000699839	0.000861703	TATTGCTCTCCGCTTAT	CATTGTTCTCCGTCTAT	0	0	1	3	0	0	0
187665	2	728730	2	745144	0	1	RIB5	365.701	899.279	5684.29	13507.6	46.3069	46.3069	0.93458	0.93458	CTTT-TTACCCGGTCCG	TTTTATTACCCGGTCCC	1	1	0	3	0	0	1
188181	2	728240	2	744653	1	0	RIB5	950.469	487.195	14330.3	8728.42	41.5523	41.5523	0.0072878	0.00093458	GGAAATTACCGAAAAAA	GGAAATTACAGAAAAAA	0	0	1	0	0	0	0
199044	2	792266	2	808284	1	0	PCA1	1028.1	286.826	17541.5	5061.49	51.0961	51.0961	1	1	AAAAGTTACCCTG-TAC	-AAAGTTACCCTGAAAT	1	1	0	4	0	0	1
203708	3	107953	3	132729	1	1	LDB16	892.655	716.782	14738.5	11982.1	37.9012	37.9012	0.0566279	0.0566279	GTTGCTCACCCGGCAGC	GTTGCTCACCCGGCAGC	1	1	0	0	1	0	0
205537	3	94533	3	119346	0	1	NFS1	2.28924	851.895	3092.48	15105.5	8.27394	8.27394	0.000496244	0.00818995	TCACGTCATCCACTATT	TCACGTTATCCACTATC	0	0	1	1	0	0	0
205573	3	94499	3	119312	1	1	NFS1	911.018	2093.68	12452.7	30716.4	46.3069	46.3069	0.93458	0.93458	CCCTATTACCCGCAATA	CCCTATTACCCGCACTC	1	1	0	2	0	0	1
212103	3	50496	3	80993	1	1	GLK1	2206.39	2336.07	37809.3	42735.3	51.0961	41.7646	1	1	ATATGTTACCCTGTCGG	CTCTATTACCCTATCGG	1	1	0	4	0	0	1
212182	3	50575	3	81037	1	0	GLK1	623.437	2.32375	9734.19	639.684	6.74769	3.55341	0.00093458	4.90501e-05	TGTTATTTCCCGTTTTT	-----------------	0	0	7	10	0	0	0
212229	3	50622	3	81073	0	1	GLK1	522.33	846.278	7238.95	12540.3	25.604	25.604	0.00667645	0.000234354	AGGGGTTGACCGTCCGT	AGGGGC--ACCGTCCGT	0	0	3	0	0	0	0
214130	3	40933	3	71417	1	0	YCL049C	768.847	2.32375	12313.4	254.616	30.9576	7.60056	0.0465067	0.000625453	CTGGGATACCCGAATGT	CTAGAATACTCGAATGT	0	0	1	2	0	1	0
217130	3	31274	3	61744	1	1	SPB1	1435.92	1033.94	23279.8	16435.9	51.0961	36.8576	0.132343	0.132343	CTGGGTAACCCGCTTTT	AAAGGTAACCCGGTTT-	1	1	0	5	1	0	0
217162	3	31305	3	61773	0	1	SPB1	296.123	2094	4426.08	30424.1	51.0961	36.8576	0.132343	0.132343	CTGGGTAACCCGCTTTT	AAAGGTAACCCGGTTT-	1	1	0	5	0	0	0
219667	3	120727	3	146129	0	1	YCP4	92.8932	1469.46	2104.01	27479	8.64956	6.13448	0.000509487	0.0673188	ACGCATTATTTTTATAA	ACGCATTATCCTCACGA	0	1	2	3	0	0	0
219770	3	120628	3	146027	1	1	YCP4	1010.27	1819.03	19941.1	26797.2	46.3069	46.3069	0.93458	0.93458	TTT---TACCCGGA-GG	TATGCTTACCCGAATGG	1	1	1	5	0	0	1
222791	3	132266	3	158612	1	0	RVS161	910.278	97.1476	14438.6	1189.56	41.7646	14.3496	1	0.141607	AAAGATTACCCTTTCAG	AAAGATAACCCTTTCGG	1	1	1	1	0	1	0
224731	3	137174	3	163525	1	1	ADP1	5194.36	3766.47	87937.7	67959.7	51.0961	41.7646	1	1	G-ATGTTACCCTCATAA	GGAT--TACCCTCATAT	1	1	1	3	0	0	1
224757	3	137148	3	163499	1	1	ADP1	3697.95	568.971	58563.3	11242.8	13.5554	13.5554	0.0605918	0.0605918	TGGCTTCACCCTCATAC	TGGCTTCACCCTCATAC	1	1	0	0	1	0	0
224812	3	137093	3	163444	1	1	ADP1	609.151	1316.59	10999.6	20766.2	9.12079	5.42015	4.65067e-05	0.000103582	GCGCCCAAATCGGCATC	GCGCCCTAATCGATATC	0	0	1	2	0	0	0
228437	3	147771	3	175466	1	1	CWH43	2626.03	1746.09	41809.2	28965.3	46.3069	46.3069	0.93458	0.93458	ACTTCTTACCCGAACTA	ACCTCTTACCCGAACTA	1	1	0	1	0	0	1
228477	3	147731	3	175426	0	1	CWH43	433.985	815.804	7021.47	12423.5	18.0334	18.0334	0.000121659	0.000121659	ATAAGTTACCAAGTCAA	ATAAGTTACCAAGTCAA	0	0	0	0	1	0	0
234872	3	168292	3	195884	1	0	RHB1	687.107	516.707	12470.3	10074.5	41.5523	41.5523	0.120833	0.120833	AGGTCCTACCCGGATTC	AGGTCCTACCCGGATTC	1	1	0	0	1	0	0
234924	3	168245	3	195837	0	1	RHB1	232.004	593.256	4142.76	7695.49	7.08063	10.3996	6.63317e-05	0.001	ATTTTT--CACTATCTT	ATTTTTTACACTGTCCT	0	0	2	2	0	0	0
236894	3	179328	3	206874	1	1	RPS14A	1408.88	1439.23	22249.9	23845.7	46.3069	46.3069	0.93458	0.93458	CCCCATTACCCGGATTA	-CCCATTACCCGGATTG	1	1	0	2	0	0	1
237284	3	178970	3	206515	1	0	RPS14A	5410.68	503.04	82436.1	9731.79	35.0841	35.0841	0.00093458	0.00093458	CATTGTTACCTG-----	CA-TGTTACCTGTTAGT	0	0	0	6	1	0	0
237330	3	178933	3	206481	0	1	RPS14A	463.34	3494.94	6993.87	54476.1	46.3069	51.0961	0.93458	0.93458	TA---TTACCCGGCCCT	TAACGTTACCCGGACAT	1	1	0	5	0	0	1
237365	3	178901	3	206449	1	1	RPS14A	6554.73	2883.53	124744	50547.6	46.3069	51.0961	0.93458	0.93458	TA---TTACCCGGCCCT	TAACGTTACCCGGACAT	1	1	0	5	0	0	1
237389	3	178877	3	206430	0	1	RPS14A	138.045	4685.24	2551.01	75524.7	18.0195	13.5554	0.00605402	0.00380025	A---TATACCCAGATAT	ACGTTAT---CAG---G	0	0	3	7	0	0	0
238306	3	186161	3	213707	1	0	SNT1	1346.01	528.984	21134.4	8557.73	41.5523	41.5523	0.0465067	0.0465067	AAAAAATACCCGGCGTT	AAAAA-TACCCGGCGTT	0	0	1	0	0	0	0
241891	3	205524	3	233040	1	1	TAF2	1221.76	895.704	18802.9	13632.5	51.0961	46.3069	0.93458	0.93458	A-GTGTTACCCGGTTAC	ATGTATTACCCGGATAT	1	1	0	4	0	0	1
241927	3	205488	3	233004	1	1	TAF2	897.822	634	13096.5	8828.18	7.86857	11.0547	0.00408157	0.00408157	ACCAATTGCCCCATTCG	ACCAATTGCCCCATTCG	0	0	0	0	1	0	0
243259	3	211746	3	239298	1	1	BUD23	740.784	937.345	14207.4	17100.4	41.5523	41.5523	0.0465067	0.0465067	ATCAAATACCCGGCCGT	ATCAAATACCCGGCCGT	0	0	0	0	1	0	0
243671	3	213933	3	241476	1	0	YCR051W	920.082	237.717	14817.7	6049.92	46.3069	46.3069	0.93458	0.93458	AAGTATTACCCGAAACT	AACTATTACCCGCAAAA	1	1	0	4	0	0	1
243706	3	213968	3	241506	1	1	YCR051W	1993.19	1363.7	28522.8	20979.5	46.3069	46.3069	0.93458	0.93458	AAGTATTACCCGAAACT	AACTATTACCCGCAAAA	1	1	0	4	0	0	1
248786	3	236961	3	264581	1	0	SED4	885.839	65.5867	13337.5	2901.93	51.0961	51.0961	0.93458	0.93458	CGCAGTTACCCGCACCT	TGCCGTTACCCGCAACA	1	1	0	4	0	0	1
250101	3	242513	3	270155	1	1	RSA4	912.373	1010.08	13464	15473.9	51.0961	51.0961	0.93458	0.93458	AGCTGTTACCCGAGAAA	GGCCGTTACCCGAGAAA	1	1	0	2	0	0	1
256459	3	286568	3	314288	1	1	CDC50	1227.79	2064.46	21359	33496.3	5.67465	6.49493	0.000801155	0.000548955	AAAAGTTAATCGAAATT	AAAAGTAAATGGAAAT-	0	0	2	1	0	0	0
256491	3	286600	3	314317	1	1	CDC50	2130.69	2965.76	37749.4	51676.5	51.0961	51.0961	0.93458	0.93458	A-GTGTTACCCGTATTA	ACGTGTTACCCGTATTA	1	1	0	1	0	0	1
256778	3	289412	3	317136	0	1	OCA4	178.324	1099.89	4928.6	13790.5	46.3069	51.0961	0.93458	0.93458	TATTATTACCCGGAT--	------TACCCGGACTC	1	1	1	8	0	0	1
256822	3	289383	3	317102	0	1	OCA4	341.351	1797.28	12500.6	27993.4	46.3069	51.0961	0.93458	0.93458	TATTATTACCCGGAT--	------TACCCGGACTC	1	1	1	8	0	0	1
256854	3	289357	3	317070	1	1	OCA4	709.382	855.447	12164.8	13164.2	7.7253	8.21082	0.001	0.001	TTC-TTTACCTTACTGT	TTCATTTACCTTACCTT	0	0	0	3	1	0	0
263669	4	442494	4	444465	1	1	MED2	1901.25	991.513	29075.5	15216.4	46.3069	46.3069	0.93458	0.93458	GGATATTACCCGCTTGT	GACTATTACCCGCTTAT	1	1	0	3	0	0	1
263772	4	442392	4	444371	1	0	MED2	781.768	50.1671	12156.5	802.673	11.2333	7.17166	0.0183085	0.00818995	TCCAGCAACCCTCTCTA	---AGCACCTCTCTTTA	0	0	2	4	0	0	0
265789	4	437904	4	439919	1	1	RPT2	2811.95	2072.33	49177.8	30920.3	51.0961	51.0961	0.93458	0.93458	----GTTACCCGGA---	ATTTGTTACCCGGAATT	1	1	0	7	0	0	1
265850	4	437964	4	439979	1	1	RPT2	1442.5	951.985	24553.3	14191	6.08321	9.34415	0.0935439	0.000101791	CACATT-AACCTTCTTT	CACATAGAACTTTCTTG	1	0	3	1	0	0	0
273359	4	410986	4	413484	1	1	GPD1	1262.63	1238.41	22082.7	20126.2	7.611	7.611	0.000120833	0.000406483	AAAGCCAAGCGTGTAGA	AAAGACTAGCGTGTAGA	0	0	1	1	0	0	0
276890	4	407497	4	410199	1	1	RTK1	2597.77	3439.35	39290.3	55925.8	46.3069	46.3069	0.93458	0.93458	CGATATTACCCGAACTG	CGATATTACCCGAACTG	1	1	0	0	0	0	1
276931	4	407456	4	410158	1	1	RTK1	1362.51	1207.01	22978.1	20792.4	6.57974	6.57974	0.0136963	0.0136963	AGCTTTTCCCCTTATAG	AGCTTTTCCCCTTATAG	0	0	0	0	1	0	0
277313	4	405127	4	407818	1	0	MRX9	1353.08	229.289	22236.2	3631.13	7.8632	10.1867	0.00031732	0.000445203	TTATTTAAGCGCTT-TT	TTATTTAAGCGTTTATT	0	0	1	1	1	0	0
277339	4	405107	4	407792	0	1	MRX9	180.07	1891.19	2968.33	31947.9	30.3954	30.3954	0.0566279	0.0566279	TGAAGTCACCCGACGCA	TGAAGTCACCCGACGCA	1	1	0	0	1	0	0
277393	4	405061	4	407741	1	1	MRX9	714.833	833.159	9504.32	13266.6	6.61198	9.83852	0.00177081	0.00177081	GTCTCCTCCCCTATAAA	ATCTCCTCCCCTACAAA	0	0	0	2	1	0	0
277983	4	399182	4	401848	0	1	ARP2	386.38	831.392	7165.19	14594.3	5.17957	7.04591	7.97608e-05	0.00403263	---ATTCTTAGTAATGA	CGGATTTATCGTAACGG	0	0	3	5	0	0	0
278008	4	399191	4	401873	1	1	ARP2	1903.76	1955.54	30087.1	31793.8	46.3069	46.3069	0.93458	0.93458	CCTTATTACCCGT----	CCTTATTACCCGTCGCA	1	1	0	4	0	0	1
278078	4	399254	4	401936	1	0	ARP2	989.767	533.028	18795	10215.9	5.67009	5.55209	0.000718832	0.000239092	TGTTTTTCGCCTTTCAA	TGTTTT-CGCATTTCAA	0	0	2	0	0	0	0
278753	4	394040	4	396718	1	1	SLM3	1466.14	1403.51	27556.6	27136	41.5523	41.5523	0.120833	0.120833	GTT-ACTACCCGGCGCT	GTTTACTACCCGGCGCT	1	1	0	1	1	0	0
278796	4	393997	4	396678	1	1	SLM3	884.265	743.213	14581.3	13662.4	4.70795	8.03515	5.24835e-05	0.0183085	GTTTCCAAACTTTCATT	GCTGCCAACCCTTCATT	0	0	2	2	0	0	0
281074	4	381618	4	383087	0	1	NAT1	214.841	580.264	2965.32	7706.03	34.2135	34.2135	1	1	ACTTTTTACCCTGCTCC	ATTTTTTACCCTGCACC	1	1	0	2	0	0	1
283801	4	369397	4	370880	1	1	STP4	6235.56	1915.14	91387.3	32707.1	46.3069	46.3069	0.93458	0.93458	ACTTATTACCCGCAGAA	ACTTATTACCCGCAGAA	1	1	0	0	0	0	1
283851	4	369349	4	370830	1	0	STP4	4018.76	363.023	65732.1	6039.65	51.0961	51.0961	0.93458	0.93458	TCATGTTACCCGCGGCT	CCACGTTACCCGCGGCT	1	1	0	2	0	0	1
293005	4	330628	4	331789	1	1	YET3	3373.37	2734.7	53451.7	44727.1	23.9194	51.0961	0.0605918	0.0534458	GAGGGTCACCCTGCCTG	GA-CGTTACCCCGCCTG	1	1	2	2	0	0	0
293080	4	330555	4	331715	1	1	YET3	1478.81	1042.8	20616.3	14540.4	7.24675	9.2241	0.0136963	0.0136963	TCTTCTTCCCCTTAATG	TCTTCTTCCCCTTAGCG	0	0	0	2	1	0	0
297716	4	304931	4	306069	1	1	SUB2	1780.33	1656.98	30167.7	28671	51.0961	51.0961	1	1	TCGCGTTACCCTTACTC	TCGCGTTACCCTTACTC	1	1	0	0	0	0	1
297771	4	304985	4	306124	1	0	SUB2	881.189	462.534	13267.7	9582.47	7.18172	8.31873	0.000681729	6.37557e-05	TACCCTTACTCGTTAAC	TACCCTTACTCGTTCAA	0	0	0	2	1	0	0
298084	4	301342	4	302483	0	1	LUC7	511.327	944.593	7433.11	14660.1	8.82165	8.82165	0.00376881	0.00376881	AAATTTTATCGGAAAAA	AAATTTTATCGGCAAAA	0	0	0	1	1	0	0
298120	4	301306	4	302447	0	1	LUC7	469.253	813.818	7882.67	13066.2	8.19908	8.19908	0.00376881	0.00376881	AAATTTTATCGGAAAAA	AAATTTTATCGGCAAAA	0	0	0	1	0	0	0
298309	4	301124	4	302266	1	0	LUC7	655.639	370.585	9559.78	5638.89	46.3069	46.3069	0.93458	0.93458	ATGTATTACCCGAATAA	GTATATTACCCGAATAA	1	1	0	2	0	0	1
298500	4	300253	4	301373	1	1	ASM4	1543.96	1633.21	23779	29246.6	41.5523	41.5523	0.120833	0.120833	CTACACTACCCGGAAGA	CTGCACTACCCGGAAGA	1	1	0	1	1	0	0
298554	4	300199	4	301319	1	0	ASM4	813.252	278.225	11485.2	5492.92	10.2673	7.96927	0.000119209	0.00278591	AAATGATGCTAGAAAAA	AAATAATACCGGAAAAA	0	0	3	1	0	0	0
300606	4	286952	4	288121	1	0	RPN6	675.182	331.886	10049.2	5632.03	8.62677	14.3496	0.000240098	0.0172277	GAAAATAA-TCAAGATC	GAAAATAACCCAAGATC	0	0	2	0	0	0	0
300733	4	286828	4	288000	1	1	RPN6	1864.94	1096.22	33479.2	17737.5	15.1487	51.0961	0.0763683	0.121659	CGGGGTTGCCCTGCCCA	CTGCGTTACCCAGCCCA	1	1	2	2	0	0	0
306098	4	255250	4	256466	1	1	IWR1	906.726	1739.34	13997.4	28887.2	38.2066	38.2066	0.132343	0.132343	AGAGATAACCCGGAATC	AGAGATAACCCGGAATC	1	1	0	0	1	0	0
306154	4	255194	4	256410	0	1	IWR1	118.289	860.863	2908.33	15548.1	9.16519	29.905	9.04829e-05	0.0171107	ATCAATAACTTGTCTTG	ATTACCAACCCGTCTTC	0	0	3	3	0	0	0
308458	4	241254	4	242443	0	1	SNA4	341.102	1361.51	9271.98	21229.5	51.0961	41.7646	0.121659	1	GTTTATCACCCCGTTAC	TTTTATTACCCTGCTGC	1	1	2	3	0	1	0
308537	4	241333	4	242521	1	1	SNA4	634.793	644.96	11160	10494.5	11.5141	11.5141	0.00278591	0.0763683	TTTGATGGCCTTTTATA	TT-GATTGCCCTTTATA	0	1	2	1	0	0	0
308709	4	240202	4	241395	1	0	HNT1	597.045	352.766	10091	6630.98	51.0961	51.0961	1	1	TTGTGTTACCCTAAAG-	TTATGTTACCCTAAAAC	1	1	0	3	0	0	1
308839	4	240090	4	241281	1	0	HNT1	601.129	109.295	8615.8	1872.46	9.6083	9.06739	0.00856449	0.00177081	CTCCTTTACTCGTATTT	CTCCCCTGCTCGTATTT	0	0	2	1	0	0	0
308917	4	240013	4	241203	1	0	HNT1	820.957	308.799	12843.4	4115.38	11.3895	11.3895	0.0874242	0.0874242	GAGAATTAACCGGAAAA	GAGAATTAACCGGAACA	1	1	0	1	1	0	0
309437	4	238850	4	240041	1	1	CDC48	1345.62	1123.57	23215.3	20564.5	41.5523	41.5523	0.120833	0.120833	GCGCACTACCCGGCAAC	GCGCACTACCCGGAATC	1	1	0	2	1	0	0
309510	4	238779	4	239969	1	0	CDC48	640.705	359.385	8578.26	7525.65	13.5554	13.5554	0.000255828	0.000255828	TATAT--GTCCTTTTTT	TATATATGTCCTTTTTT	0	0	2	0	0	0	0
310030	4	234236	4	235390	1	1	PCL2	1194.82	1110.25	21100.1	16135.5	51.0961	41.7646	1	1	TAACGTTACCCTGAACA	TAGCATTACCCTGAACC	1	1	0	3	0	0	1
310123	4	234318	4	235470	1	0	PCL2	586.29	92.4507	9251.7	3050.25	4.90588	6.69245	9.70363e-06	0.00261169	GTCTCATGATCTATTCA	GTCTCATAGCCTCTTTA	0	0	3	2	0	0	0
311802	4	230717	4	231873	0	1	YDL129W	14.6207	598.809	260.364	9740.14	20.0161	20.0161	0.000577977	0.00756828	CGGGATAGCCCCTGGTT	CGGGATAACCCCTGGTT	0	0	1	0	0	0	0
313527	4	223843	4	225026	1	1	CDC53	597.951	1667.78	8732.52	26441.4	24.6438	7.65178	0.00658566	0.000199451	---ACCCGCCGTTAATG	GGCACTCTCCATTGGAG	0	0	3	6	0	0	0
313570	4	223882	4	225065	1	1	CDC53	1245.97	4088.35	22556.8	72433.2	46.3069	46.3069	0.93458	0.93458	ATGTATTACCCGAAGGG	AAAACTTACCCGAATGG	1	1	0	5	0	0	1
314011	4	222018	4	223206	1	1	SRF1	620.957	637.536	11421.7	9106.58	46.3069	46.3069	0.93458	0.93458	TCCATTTACCCGTCATC	TCCATTTACCCGTCATC	1	1	0	0	0	0	1
314685	4	221453	4	222626	1	0	PPH21	667.108	33.5386	11284.9	1112.05	41.7646	41.7646	0.121659	0.000616909	TAGCATTACCCAAGAG-	CAGCAATAGTACAGAGT	1	0	5	2	0	0	0
314779	4	221364	4	222538	1	0	PPH21	586.552	68.7571	9055.2	1067.58	24.6438	29.905	0.0673188	0.00658566	TGATTTTATCCTTAAAA	TGATTTCATCCTTAAAA	1	0	1	0	0	1	0
315199	4	219454	4	220627	1	1	RDI1	1194.64	649.764	16654.8	9518.81	38.2066	38.2066	0.0566279	0.0566279	CCGTTTCACCCGGAGTA	CCGTTTCACCCGGAGTA	1	1	0	0	1	0	0
315255	4	219400	4	220573	1	0	RDI1	650.4	173.416	10820.8	2602.25	13.5554	8.44811	0.001	6.54656e-05	--ACGTTTCCCTGATCT	TTAC--TTCCTTGATCT	0	0	2	3	0	0	0
315650	4	215852	4	216993	1	1	ARF2	2701	1217.83	43818.9	20460.7	46.3069	46.3069	0.93458	0.93458	---TATTACCCGGAT--	ATTTATTACCCGGTTGA	1	1	0	6	0	0	1
315717	4	215910	4	217059	0	1	ARF2	490.658	825.243	8495.08	12684.9	35.6684	29.6713	0.0171107	0.0559846	CTAAATCACCGGGTTCC	CTAAATTACCGGGTTCT	0	1	1	1	0	1	0
315754	4	215947	4	217096	1	0	ARF2	873.84	327.598	13438.9	5007.5	35.6684	29.6713	0.0171107	0.0559846	CTAAATCACCGGGTTCC	CTAAATTACCGGGTTCT	0	1	1	1	0	0	0
315790	4	215983	4	217132	1	1	ARF2	853.504	684.493	14344.4	11667.8	11.0247	7.47668	0.0497621	0.000445203	CACATATACCCTTACAG	CACATATACGCTTACAG	1	0	1	0	0	1	0
317302	4	211302	4	212484	1	1	RPO21	1338.86	1062.66	19970.7	16603.8	38.2066	38.2066	0.132343	0.132343	TACGGTAACCCGGACCT	TATGGTAACCCGGA-CT	1	1	0	2	1	0	0
317424	4	211184	4	212365	1	1	RPO21	613.104	556.845	8417.75	6927.96	9.9732	9.9732	0.000922021	0.000922021	GTCGGTTCTCCTTAGTT	GTCGGTTCTCCTTAGTT	0	0	0	0	1	0	0
320028	4	176485	4	177698	1	1	CLB3	1156.2	860.493	17060.5	13074.5	51.0961	51.0961	0.93458	0.93458	CTCAGTTACCCGCACTG	CTCCGTTACCCGCA-GG	1	1	0	3	0	0	1
320753	4	172358	4	173577	1	1	STE7	1268.36	1150.15	22794.7	20338.4	51.0961	51.0961	0.0534458	0.0534458	CGCCGTTACCCCACGAA	CGCTGTTACCCCACGAA	1	1	0	1	1	0	0
321319	4	167625	4	168834	0	1	CDC9	287.287	699.326	5257.72	10919.4	46.3069	46.3069	0.93458	0.93458	ATC-ATTACCCGGATGA	-TCTATTACCCGGATGA	1	1	0	2	0	0	1
323928	4	148044	4	149337	1	1	DLD1	835.508	1933.64	16502.9	31687.3	51.0961	51.0961	1	1	TAGGGTTACCCTGACAG	T-GGGTTACCCTGACAA	1	1	0	2	0	0	1
323966	4	148010	4	149305	0	1	DLD1	106.29	642.087	1762.19	10878.6	9.69058	8.44811	0.000621205	0.00678565	AGGAACTCGTCTGGTTA	---AACTAGCCTGATTG	0	0	2	5	0	0	0
324086	4	147895	4	149186	0	1	DLD1	322.169	645.737	4923.66	9258.83	9.60735	9.81251	0.00222739	0.00171264	CTTGTCAACCCAGGTCC	CTTACAAACCTGGGTCC	0	0	3	2	0	0	0
324652	4	145634	4	146949	1	1	AIR2	2120.71	782.622	32369.3	19188.6	41.5523	41.5523	0.120833	0.120833	AGGCACTACCCGGAT-C	AATCGCTACCCGGATTC	1	1	0	4	1	0	0
326961	4	134835	4	136187	1	1	INH1	2529.82	1143.93	43572.9	20317	17.8849	17.8849	0.00916399	0.0048047	AAGATTTACTCTCCCGT	AAGATTTACCTTCCCGT	0	0	2	0	0	0	0
327060	4	134934	4	136282	1	1	INH1	4748.07	3274.97	79062.2	53543	42.4042	42.4042	0.00093458	0.00105889	ACCAAATATCCAGATAT	ACCAGCTATCCAGATAT	0	0	1	1	0	0	0
329213	4	125321	4	127958	1	1	PPH22	3199.23	3322.84	43198.9	52905.4	41.7646	41.7646	1	1	GTGTATTACCCTGACAT	GTTTATTACCCTGAGGT	1	1	0	3	0	0	1
329268	4	125268	4	127906	1	1	PPH22	3922.49	3486.26	68983.2	62677.9	46.3069	46.3069	0.93458	0.93458	CTAGATTACCCGG--TC	CTA--TTACCCGGAGT-	1	1	0	5	0	0	1
330487	4	117491	4	120094	1	1	RPL35A	594.5	726.65	10385.8	11716.7	38.2066	38.2066	0.0566279	0.0566279	GGGGTTCACCCGGAGAG	AAGGTTCACCCGGACAG	1	1	0	3	1	0	0
330980	4	116038	4	118636	1	1	ARF1	674.914	1089.83	11158.8	18251.7	41.7646	41.7646	1	1	TGTTATTACCCTTCCCT	TGTTATTACCCTTCCCT	1	1	0	0	0	0	1
335532	4	88137	4	90654	1	1	GLE1	1264.85	888.268	22284.7	15137.1	51.0961	51.0961	0.93458	0.93458	CCCGGTTACCCGAAAAG	TTCGGTTACCCGAACAG	1	1	0	3	0	0	1
335580	4	88183	4	90698	1	0	GLE1	657.519	514.444	10557.5	9293.07	5.07174	5.66949	1.32464e-05	0.000119209	------TCTCTTGTTAT	GCTCGCTCTCCTGCT-T	0	0	2	7	0	0	0
335731	4	87423	4	89940	1	1	CWC2	552.861	684.709	9297.89	10318.4	4.0167	4.45449	3.29712e-05	8.01941e-05	GTAAAAAA-CGAATGCA	GTAAAAAAACCAAAACA	0	0	2	2	0	0	0
335771	4	87386	4	89902	0	1	CWC2	107.39	1487.3	2916.23	20348.6	9.6591	9.6591	3.15915e-05	0.000521382	GCATTCCATCGTTACAT	GGATTCTATCGTTACAT	0	0	1	1	0	0	0
335830	4	87327	4	89846	1	1	CWC2	1372.66	3177.79	21698.6	49356.9	46.3069	46.3069	0.93458	0.93458	CATCATTACCCGCATAT	GATCATTACCCGCATAT	1	1	0	1	0	0	1
338027	4	78105	4	80647	1	0	NOP6	672.468	424.489	10294.1	6367.12	46.3069	46.3069	0.93458	0.93458	C--GTTTACCCGGCATT	CAAATTTACCCGGCATT	1	1	0	3	0	0	1
339098	4	74312	4	76886	1	1	GDH2	846.594	616.305	12582.1	9608.61	9.2241	8.40394	0.0599034	0.0599034	TTTATTTACCGTCGGAA	TTTATTTACCGTCGGAA	1	1	0	0	1	0	0
339123	4	74287	4	76861	1	1	GDH2	1247.82	2010.24	18855.2	32476.5	51.0961	51.0961	0.141607	0.141607	ATGGGTAACCCTTTTCA	AGGGGTAACCCTTTTCC	1	1	0	2	1	0	0
339237	4	74175	4	76747	0	1	GDH2	403.018	582.887	7535.96	9606.62	17.5047	5.91172	0.0534458	0.00514103	TATTTTTACCCCAATTG	TATTTTTACTCCAACAG	1	0	1	2	0	1	0
339908	4	68883	4	71433	1	1	TIM22	1001.81	1448.34	18457.2	25543.3	31.8197	31.8197	0.0566279	0.0566279	AATTGTCACCCGGTATA	AATTGTCACCCGGTATA	1	1	0	0	1	0	0
339945	4	68846	4	71396	1	1	TIM22	694.924	758.095	13369.5	14040	8.15394	8.05043	0.000260605	0.00403263	TGATATTTTCGTACGCC	TTGTATTATCGTGCAAC	0	0	1	5	0	0	0
342257	4	56869	4	59476	1	1	WHI4	2026.27	3256.71	33006.9	52021.3	41.7646	46.3069	0.121659	0.93458	GTGCATTACCCAGCGTT	GTGTATTACCCGACTTT	1	1	1	3	0	1	0
342288	4	56838	4	59445	1	1	WHI4	2658.55	3260.06	42478.7	48373.9	46.3069	46.3069	0.93458	0.93458	TTTCATTACCCGGACGT	AATCATTACCCGAATAT	1	1	0	5	0	0	1
342603	4	52322	4	54926	1	1	GCS1	860.995	1171.79	13409.9	18025	51.0961	51.0961	0.93458	0.93458	CGCGGTTACCCGCAAGC	CGCGGTTACCCGCAAAC	1	1	0	1	0	0	1
344036	4	34174	4	36657	1	1	YPD1	1116.78	1007.54	16291.7	16281.2	36.8576	36.8576	0.132343	0.132343	ATCCGTAACCCGCCCGA	CTCCGTAACCCGCCCGA	1	1	0	1	1	0	0
349103	4	453867	4	455821	1	0	RCR2	2144.74	157.783	40267.8	2586.03	7.04591	5.21029	0.00147139	0.0120944	TTGAGCTAATCTCCATG	TTAAGCTAACCTACATG	0	0	1	2	0	0	0
349184	4	453938	4	455894	1	1	RCR2	5010.58	1249.29	83270.1	20858.1	46.3069	51.0961	0.93458	0.121659	TA---TTACCCGGAAAC	TACCGTTACCCAG---C	1	1	1	6	0	1	0
350174	4	461504	4	463488	1	1	SOK1	2809.36	3093.71	37029.2	41161.3	35.6684	35.6684	0.0566279	0.0566279	GCCGCTCACCCGCACGG	GCCGCTCACCCGCACGG	1	1	0	0	1	0	0
350258	4	461420	4	463404	1	1	SOK1	960.729	1213.82	14787.4	18293.2	7.65178	7.75828	0.000591471	0.000591471	CGGGGCTGCCGTTTGAA	CGGGGCTGCCGTCTGAA	0	0	0	1	0	0	0
351891	4	465442	4	467300	1	0	SNQ2	1033.6	178.635	15068	3009.39	18.0195	8.8036	0.00605402	0.00097851	TACCAATACCCAGCGGG	TACCAACACCCAGTGGG	0	0	1	1	0	0	0
351925	4	465476	4	467333	1	0	SNQ2	910.779	113.052	15039.6	2075.46	18.0195	10.4533	0.00605402	0.00097851	TACCAATACCCAGCGGG	TACCAACACCCAGTGGG	0	0	1	1	0	0	0
354622	4	478855	4	480333	1	1	DAD1	1017.6	665.001	16896.6	11462.3	46.3069	46.3069	0.93458	0.93458	GACTTTTACCCGGAGGT	TGCCTTTACCCGGGAGT	1	1	0	5	0	0	1
357896	4	488753	4	490227	0	1	ATG31	31.5026	752.199	504.041	11975.4	6.94155	7.91603	0.00783398	0.0673188	GACGTTTATCTTGGATA	AATGTT-ATCCTGGGCA	0	1	2	4	0	0	0
357938	4	488711	4	490188	0	1	ATG31	2.28924	701.556	138.736	11605.1	12.3557	7.86857	0.0559846	0.0673188	GACGTTTATCTTGGATA	AATGTT-ATCCTGGGCA	1	1	2	4	0	0	0
359662	4	501727	4	503863	1	1	REG1	840.204	1476.94	15600	23130.1	9.0794	5.95047	0.000227648	0.00293827	TAGTCTTCGCGGCTCTT	TAGTCTTAGCGGCTCTT	0	0	1	0	0	0	0
359703	4	501696	4	503822	1	1	REG1	3375.75	2272.96	58775.3	35527.9	46.3069	46.3069	0.93458	0.93458	TTGTATTACCCGGAAAC	---TATTACCCGGAAA-	1	1	0	4	0	0	1
359758	4	501642	4	503777	1	1	REG1	2245.13	612.216	35124.8	9665.05	7.9181	11.9696	2.86904e-05	1.57294e-05	GTTGTATATTCGTGTGT	GTTTTATGTTCGTGCGT	0	0	1	2	0	0	0
361888	4	504996	4	507154	1	1	PST2	1599.41	2969.94	24246.9	43877	46.3069	46.3069	0.93458	0.93458	ATCGCTTACCCGTCT-C	GCCCATTACCCGTCTGC	1	1	0	5	0	0	1
361936	4	504951	4	507109	1	1	PST2	595.628	701.035	7759.11	9217.49	46.3069	46.3069	0.93458	0.93458	ATCGCTTACCCGTCT-C	GCCCATTACCCGTCTGC	1	1	0	5	0	0	1
362026	4	504863	4	507021	0	1	PST2	476.529	1210.57	9230.22	20141.4	8.8036	13.3898	0.00916399	0.00916399	TACAGTTACTCTCTGGA	TAC--TTACTCTCTGAA	0	0	0	3	1	0	0
366862	4	539690	4	527303	1	1	RSM10	957.301	1768.42	16311.3	30811.6	46.3069	46.3069	0.93458	0.93458	GG-TATTACCCGCCTG-	CGCTATTACCCGCCCGA	1	1	0	4	0	0	1
366918	4	539730	4	527357	0	1	RSM10	197.17	774.462	3602.81	12213.7	5.42015	9.25214	0.00380025	0.000509487	---GCCCTTTCTTGCAT	TACGCCCTTTCTTGCTT	0	0	0	4	0	0	0
372476	4	556944	4	544488	1	1	TPI1	13750.7	26310.7	208320	394020	15.1208	15.1208	0.0605918	0.0605918	CGGTATCACCCTACTTA	CGGCATCACCCTACTTA	1	1	0	1	1	0	0
372530	4	556890	4	544434	1	1	TPI1	11282.9	28832.7	184139	420148	46.3069	46.3069	0.93458	0.93458	GAAGATTACCCGTTCTA	---GATTACCCGTTCTA	1	1	0	3	0	0	1
374090	4	560909	4	548453	1	0	DBF4	915.866	338.442	15459.3	6383.66	46.3069	46.3069	0.93458	0.93458	ATATTTTACCCGCAGT-	ATATTTTACCCGCAATA	1	1	0	2	0	0	1
374768	4	563032	4	550591	1	0	CDC34	896.283	199.825	11968.3	3030.2	27.9074	27.9074	0.00165497	0.00093458	TAGCACTCCCCGTTGAC	AAGCACTCCC--TTGAC	0	0	2	1	0	0	0
374903	4	562900	4	550460	1	0	CDC34	607.436	234.373	9243.75	3594.61	16.6898	6.62367	0.00732148	0.000492873	GGGGCCCACCCGCGGAA	GGGGCCCATCCGCGGAA	0	0	1	0	0	0	0
374964	4	562841	4	550403	1	0	CDC34	782.913	476.666	10261.5	7610.48	35.6684	12.9729	0.0713724	0.0713724	AGTAATTGCCCGCTTTT	AGTAATTGCCCGCTTTT	1	1	0	0	1	0	0
376531	4	570444	4	558454	1	0	UBC5	1469.29	465.847	21851.1	7612.49	51.0961	51.0961	0.93458	0.93458	TTCCGTTACCCGTTGCA	CAATGTTACCCGCTGAA	1	1	0	6	0	0	1
377369	4	569971	4	557638	0	1	UBC5	11.4462	1014.85	785.999	17075.4	42.4042	42.4042	1.92522e-05	0.00055913	ATTACCCGCTCGCAGTG	GTTACCCGCCCGCAGTG	0	0	1	1	0	0	0
377428	4	569924	4	557579	1	1	UBC5	1214.4	2357.88	18660.4	33419.1	46.3069	51.0961	0.93458	0.93458	CTTTATTACCCGCTCGC	CTTTGTTACCCGCCCGC	1	1	0	2	0	0	1
381523	4	589650	4	577655	1	0	PAA1	1080.09	443.48	16490.4	6822.31	10.1469	10.1469	0.141607	0.141607	CAGGTTAACCCTTTATT	CAGGTTAACCCTTGATT	1	1	0	1	1	0	0
381876	4	592303	4	580307	0	1	IPT1	537.681	601.455	8744.79	9842.53	8.44811	8.5643	0.000112172	2.96765e-05	GTCTGTTCTCCACTCCG	GTCTGTTTTTCACTCCG	0	0	2	0	0	0	0
381938	4	592241	4	580248	1	1	IPT1	1378.66	903.609	19353.2	17760.7	51.0961	41.5523	0.93458	0.00093458	GATTGTTACCCGGC---	--TTGGTACCCGGCCGA	1	0	1	5	0	1	0
382206	4	592003	4	579992	1	0	IPT1	1497.08	42.2837	23250.7	1369.45	15.7877	6.55931	0.0673188	0.00856449	CGGGGTTATCCTTGGTT	TGGGGCTATTCATGATT	1	0	3	2	0	0	0
382269	4	591940	4	579934	1	0	IPT1	1137.56	4.64751	21150.6	616.034	31.3451	11.0547	0.0497621	0.000156803	GTAGAATACCCTGCTGC	ACGGAATACCTTGCTGC	1	0	1	3	0	1	0
383407	4	593482	4	581452	0	1	TPS2	471.69	723.332	8366.09	13159.4	9.49625	9.49625	0.00667645	0.00667645	AGGGGTTGACCGTTGGA	AGGGGTTGACCGTCGGA	0	0	0	1	1	0	0
385147	4	600163	4	588123	0	1	SED1	0	951.014	30.8596	15779	36.3043	46.3069	0.120833	0.93458	GAGGATTACCTTTTTCG	-AGGATTACCCGTTTCG	1	1	2	1	0	1	0
387791	4	617402	4	605378	1	1	SSS1	588.13	767.027	11162.5	12694.1	41.7646	41.7646	1	1	ATTCATTACCCTCTGTG	AATCATTACCCTCTATG	1	1	0	2	0	0	1
390517	4	626287	4	613966	0	1	ILT1	432.854	1559.84	6834.55	24106.4	9.16519	8.31873	0.000793506	0.00115975	A---AACGTTCAGTAAT	AGATAA--TCCATTGAT	0	0	3	5	0	0	0
390615	4	626189	4	613872	1	1	ILT1	2595.3	3620.93	45581.7	61235.9	46.3069	46.3069	0.93458	0.93458	TCATATTACCCGAAGCA	TCCTATTACCCGAATCA	1	1	0	2	0	0	1
392188	4	628717	4	616410	1	1	RLI1	678.257	756.29	10269	10927.7	41.5523	41.5523	0.120833	0.120833	CAAAACTACCCGGCTAG	-AAAACTACCCGGCTAC	1	1	0	2	1	0	0
392425	4	636179	4	624023	1	1	GIS1	2593.45	3369.52	46837.5	55678.5	37.9012	37.9012	0.0566279	0.0566279	GTGTATCACCCGGCACG	GTGGATCACCCGGCACG	1	1	0	1	1	0	0
394552	4	644065	4	631879	1	1	MSH6	1542.03	985.682	24415.6	16094.7	18.0587	18.0587	0.0713724	0.0713724	-ACCATTGCCCGGA-GA	TACTATTGCCCGGAGGA	1	1	0	3	1	0	0
394642	4	643977	4	631792	1	0	MSH6	623.661	92.9068	8716.32	2212.88	6.12885	5.85667	0.00035549	0.00035549	TGGCGATGACCTATACA	TGACGATGACCTTT-CA	0	0	0	3	0	0	0
405617	4	694261	4	675302	1	0	KIN1	601.623	319.982	9257.12	5536.68	24.1353	6.90322	0.000244344	0.000681729	TGCAAATAACGACGATG	TACTATTAACGAAGATG	0	0	1	3	0	0	0
405679	4	694322	4	675364	1	1	KIN1	1557.77	1928.72	22684.8	30343.9	29.1592	29.1592	0.0128003	0.0128003	TTGGGTTCCCCGGCTTG	GTGGGTTCCCCGGCTTA	0	0	0	2	1	0	0
408395	4	709386	4	690488	1	1	MTC5	647.927	558.195	10954.5	9280.99	51.0961	51.0961	1	1	ACAAGTTACCCTTACAT	GTAAGTTACCCTTACAT	1	1	0	2	0	0	1
411176	4	730356	4	711523	1	0	HPR1	1448.69	16.7224	23096	355.361	12.3557	16.4181	0.0874242	0.0171107	GTTAGTTAACCGGCTTT	GTTAATCAACCCGTTTC	1	0	2	3	0	0	0
411215	4	730395	4	711559	1	0	HPR1	1038.97	19.0461	15494.9	346.109	12.3557	16.4181	0.0874242	0.0171107	GTTAGTTAACCGGCTTT	GTTAATCAACCCGTTTC	1	0	2	3	0	0	0
413285	4	746549	4	727685	0	1	MKC7	281.741	1766.22	4275.47	25216.5	46.3069	46.3069	0.93458	0.93458	CTGTATTACCCGGGCAG	CCGCATTACCCGGGCAG	1	1	0	2	0	0	1
413429	4	746409	4	727544	0	1	MKC7	310.646	1489.68	4730.05	21977.3	19.966	11.0247	0.000445203	5.40662e-05	TCTAGTAAGCGTAGCGA	TCTAGTAAGGGTAGCAA	0	0	1	1	0	1	0
413821	4	751442	4	732677	1	1	SWI5	2540.56	1428.81	31330.4	21405.5	41.5523	41.5523	0.120833	0.120833	TTTGGCTACCCGGAGGT	CTCGGCTACCCGGAGGT	1	1	0	2	1	0	0
413861	4	751403	4	732637	1	1	SWI5	1621	635.515	25534	11952.1	7.75828	10.3996	0.00362966	0.00774498	TATCATCACCG-TTTTC	TGCCACTACCGTTTTTC	0	0	3	2	0	0	0
414212	4	751080	4	732295	1	1	SWI5	874.422	1155.09	14505.8	17662.5	29.3794	31.5163	0.0935439	0.0935439	GTACTTTAACCTGTTTA	GTGCTTTAACCTGATTA	1	1	0	2	1	0	0
414575	4	755493	4	736727	1	0	KGD2	565.463	429.623	8651.39	7268.13	35.6684	35.6684	0.00732148	0.00732148	TCCAGCCACCCGCATCT	TCCAGCCACCCGCATCG	0	0	0	1	1	0	0
415147	4	765602	4	749381	0	1	CTH1	84.6495	1086.97	1660.81	15225.9	9.19339	5.58959	8.81414e-05	0.00566799	TAAAGCCAATCTAACGA	CGAAGTCAACCTTAAGA	0	0	2	4	0	0	0
415179	4	765570	4	749349	1	1	CTH1	635.312	1738.77	9739.56	27585	51.0961	51.0961	0.93458	0.93458	TTCTGTTACCCGAGTTT	CTTTGTTACCCGATTTT	1	1	0	3	0	0	1
415702	4	768295	4	752066	1	1	ENT5	1165.83	1587.44	17465.7	22296.3	41.5523	41.5523	0.00093458	0.00093458	GGGCGGTACCCGGCGGC	GGTCGGTACCCGGCGGC	0	0	0	1	1	0	0
416099	4	769396	4	753166	1	1	CPR1	4498.44	4213.28	73683.2	69405.4	46.3069	46.3069	0.93458	0.93458	TATGCTTACCCGTCGC-	TACTCTTACCCGCCCCA	1	1	0	5	0	0	1
416238	4	769260	4	753029	1	1	CPR1	5244.74	4590.03	66844.9	65615.3	19.966	13.7478	0.000502936	5.66344e-05	CGTGGAAGCCCGTCTAG	CGTGGAAGGCCGTCTAA	0	0	1	1	0	0	0
417959	4	778839	4	762543	1	0	ACL4	693.295	90.7993	11109	1261.9	5.53009	5.38314	0.000121659	4.90501e-05	CTGCTTTACGCACTAGA	GTGCCTTACGTAGTTGA	0	0	1	4	0	0	0
418039	4	778907	4	762609	1	0	ACL4	1446.64	102.763	25597.4	3145.59	5.95339	6.02055	0.00035549	0.00035549	ATGAGATGACCTTAGTA	ATGAGATGACCTTAGCA	0	0	0	1	0	0	0
418086	4	778954	4	762654	1	0	ACL4	712.668	90.6807	11375.1	1720.21	6.38437	10.0769	0.0935439	0.00035549	AACTATTAACCTACTAA	AACTAGTAACCTGCTAA	1	0	1	1	0	1	0
425314	4	808070	4	788852	0	1	SUP35	48.4162	1586.76	857.414	26699.1	11.197	11.5715	0.001	0.0497621	AGCATGTACCTCTTTTG	AGCAGATACCCTTTTT-	0	1	3	2	0	0	0
425375	4	808129	4	788913	0	1	SUP35	193.246	2335.77	3245.3	33015.2	41.5523	41.5523	0.0465067	0.0465067	ATATAATACCCGGTTGT	ATTTAATACCCGGTTGG	0	0	0	2	1	0	0
425912	4	811817	4	792608	1	1	ARG82	11898.8	3449.18	220698	64320.3	51.0961	51.0961	0.93458	0.93458	AAATATTACCCGACTCG	TTTCATCACCCGACACG	1	1	1	5	0	0	1
425954	4	811777	4	792567	1	1	ARG82	10406.7	1727	163061	43425.5	51.0961	51.0961	0.121659	0.93458	T--AGTTACCCAGCCTA	TTGAGTTACCCGGAGTC	1	1	1	5	0	1	0
427067	4	817764	4	798553	1	0	SDH4	753.356	9.29502	12412.7	405.51	19.8031	19.8031	0.000922021	0.00435042	CTTATATAACTAAATTG	CTTATATAACCGAATTG	0	0	2	0	0	0	0
431251	4	842150	4	822752	0	1	RVB1	416.531	706.053	6703.28	12423.8	46.3069	46.3069	0.93458	0.93458	CTCCATTACCCGCAGAG	C---ATTACCCGCAGAT	1	1	0	4	0	0	1
435677	4	867891	4	848468	0	1	UME6	122.833	607.544	2547.41	10696.9	6.90899	16.075	0.00929091	0.0713724	CCCACTTGCCCAAAACA	CCCACTTGCCCGCAAGA	0	1	1	2	0	0	0
439163	4	892541	4	861448	1	1	AHA1	1006.51	1159.47	15678.1	19342.3	51.0961	51.0961	0.121659	0.121659	TTGTGTTACCCAGTTCA	TTGTGTTACCCAGCGCA	1	1	0	2	1	0	0
439270	4	892643	4	861553	1	1	AHA1	561.773	959.439	9699.12	16376.3	9.58096	7.54986	0.00320159	0.0599034	CCTACTTACCGCATTGT	CCTACTTACCGTATTGT	0	1	1	0	0	1	0
441903	4	907224	4	876109	0	1	MFB1	295.345	890.862	5531.26	14916.4	46.3069	46.3069	0.93458	0.93458	AATACTTACCCGGCCAT	CATTCTTACCCGGCCGT	1	1	0	3	0	0	1
441944	4	907185	4	876068	1	1	MFB1	2106.79	1963.43	33078.5	31407.7	46.3069	46.3069	0.93458	0.93458	AATACTTACCCGGCCAT	CATTCTTACCCGGCCGT	1	1	0	3	0	0	1
442020	4	907111	4	875992	1	0	MFB1	943.629	234.422	14857.8	3903.33	18.0195	5.34119	0.0157294	0.000728003	TGCACCTACC--CAGTA	CACACCTGCCAAAATTA	0	0	3	4	0	0	0
445646	4	924627	4	893248	0	1	PCF11	150.771	670.896	2712.65	11631.3	25.604	25.604	0.0713724	0.0713724	TTCTTTTGCCCGCATTG	T--CTTTGCCCGCATTG	1	1	0	3	1	0	0
446227	4	924062	4	892689	1	1	PCF11	2943.34	2230.2	45720.2	33838.7	46.3069	46.3069	0.93458	1	TCCCTTTATCACCAAAT	TCTCTTTACCCTCATAC	1	1	3	3	0	0	1
446286	4	924003	4	892632	1	1	PCF11	1528.2	831.716	19119.6	14998.4	5.95023	7.06943	0.00400808	0.00929091	GCTTTCTTCCCATGCCT	GCATTTTGCCCAAGC--	0	0	2	4	0	0	0
446698	4	927026	4	895640	1	1	COX20	2909.23	2086.76	49219.3	37241.3	34.2135	34.2135	1	1	ACGGCTTACCCTACCGC	ACGGCTTACCCTACCAC	1	1	0	1	0	0	1
446736	4	926988	4	895605	1	1	COX20	1390.97	1079.23	22046.7	16987.4	11.7913	10.0337	0.0072878	0.00362966	ATGCTTTACCGAGCAGT	ATGCTTCACCGTGCTGT	0	0	2	1	0	0	0
448545	4	936046	4	904681	1	0	FMN1	1091.49	518.664	16391	8454.26	41.7646	41.7646	1	1	ACGCATTACCCTCCTGC	CTGTATTACCCTCCCGC	1	1	0	4	0	0	1
448579	4	936012	4	904647	1	1	FMN1	1887.33	1025.95	29183.9	16036.7	41.7646	41.7646	1	1	ACGCATTACCCTCCTGC	CTGTATTACCCTCCCGC	1	1	0	4	0	0	1
453589	4	964978	4	933731	1	0	MET32	964.137	497.703	17640.3	8782.64	21.2083	21.2083	0.0713724	0.0713724	ATCTATTGCCCGACTGG	ATCTATTGCCCGACTGG	1	1	0	0	1	0	0
453661	4	964907	4	933665	1	0	MET32	547.799	239.611	9493.32	3085.68	7.50877	8.90513	0.000445203	1.66486e-05	CGTACTAAGCGTACTAA	CGCACTAAG--------	0	0	3	6	0	0	0
455705	4	971630	4	940393	0	1	RKM4	48.4162	734.293	930.7	10843.6	6.28099	5.93408	0.00129768	0.0120944	AAATG-TAATCTTCGAG	AAGTGCTAACCTTCGAG	0	0	2	1	0	0	0
455762	4	971575	4	940336	1	1	RKM4	747.549	1195.2	12370.2	19526.3	46.3069	46.3069	0.93458	0.93458	GTGTATTACCCGCAGTA	GAGTATTACCCGCAGAA	1	1	0	2	0	0	1
459895	4	998499	4	958251	1	1	AKR1	1260.37	834.924	17176.4	12090	38.2066	38.2066	0.0566279	0.0566279	CTTTATCACCCGGAGTG	TCTTATCACCCGGAGTG	1	1	0	2	1	0	0
459922	4	998472	4	958224	0	1	AKR1	458.595	788.058	7041.32	11676.2	11.0822	9.13416	0.00301518	0.000230264	TTATTACACCCTCATAT	TCATTACGCCCTCATAT	0	0	1	1	0	0	0
461728	4	1008822	4	968567	1	0	GLO2	1833.14	264.89	24935.5	4405.39	46.3069	46.3069	0.93458	0.93458	TCGTATTACCCGTC-GG	TTGCATTACCCGTCAGT	1	1	0	4	0	0	1
462663	4	1011519	4	971277	1	1	BSC2	919.296	552.99	16139.6	12728.9	16.6752	17.8849	0.00514103	0.129291	CGGCGCTAAC-TTCCTG	CGGCACTACCCTTCCTG	0	1	2	1	0	0	0
462840	4	1011692	4	971442	0	1	BSC2	71.1526	1126.17	1319.41	16732.9	14.4607	37.9012	0.00658566	0.0113805	TATTG---ACCACAAAA	-ATTGTTAACCACAAAA	0	0	3	1	0	0	0
475955	4	1056032	4	1014648	1	0	SUR2	733.416	232.399	12550.6	4059.26	42.4042	42.4042	0.0465067	0.0465067	TGCGGATACCCGCACAG	TACGGATACCCGCACAG	0	0	0	1	1	0	0
476137	4	1056207	4	1014814	1	0	SUR2	614.85	488.606	10662.1	9019.08	15.7877	15.7877	0.00323838	0.00714379	C-TTTTCGACCTCCTG-	CTTTTTTGACCTCCTGT	0	0	1	2	0	0	0
476704	4	1059448	4	1018029	1	1	ATP5	1148.88	676.067	20165.7	10658.4	51.0961	51.0961	0.93458	0.93458	GATCGTTACCCGAATTT	ACTTGTTACCCGAGTTT	1	1	0	4	0	0	1
477076	4	1059086	4	1017675	1	1	ATP5	1046.98	875.388	17889.8	14326.7	46.3069	46.3069	0.93458	0.93458	ATCATTTACCCGGGCCC	ATCGTTTACCCGGGCCT	1	1	0	2	0	0	1
479639	4	1075295	4	1033890	1	1	PFU1	592.428	1693.49	9020.95	25054.9	37.9012	37.9012	0.132343	0.132343	AGAGGTAACCCGGCCGC	CACGGTAACCCGGCCGC	1	1	0	3	1	0	0
482835	4	1090337	4	1048896	0	1	PIB1	192.748	1055.59	7352.89	17545.3	5.3786	6.94039	0.000112172	0.00380025	GC-ACAGGC--TTCCAT	GCTATATGCCCTTCTAT	0	0	3	3	0	0	0
482866	4	1090307	4	1048866	1	1	PIB1	1646.55	647.307	25630.4	9807.67	8.96278	13.0336	0.000490606	0.0874242	CTATTTCACTGGCCCTT	CTATTTTAACCGTTCTT	0	1	4	2	0	0	0
482938	4	1090239	4	1048800	1	1	PIB1	2571.53	2855.1	43025.8	49970	46.3069	46.3069	0.93458	0.93458	GCCCATTACCCGGATTC	GCCCATTACCCGG---C	1	1	0	3	0	0	1
488404	4	1114212	4	1066701	0	1	PEP7	44.6572	621.353	785.549	11607.9	8.57596	7.58616	0.000555263	0.00115975	TTTTGTAATTCAGGAAT	TTTC-TAATCCAGAAAT	0	0	1	3	0	0	0
488477	4	1114139	4	1066629	0	1	PEP7	308.772	1008.8	5567.88	15697.3	41.7646	41.7646	1	1	AAGTATTACCCTGCCTG	AAGCATTACCCTGCCTG	1	1	0	1	0	0	1
490733	4	1126194	4	1078692	1	1	SKP1	2399.86	1770.88	44352.6	31773	41.7646	41.7646	1	1	TGACATTACCCTGCAGC	TAGCATTACCCTGCAAC	1	1	0	3	0	0	1
490808	4	1126122	4	1078617	1	0	SKP1	1169.25	483.584	19284.1	10270.8	4.99309	7.45441	0.00987374	0.0136963	ATTTCTTCCCTTTCTCT	ACTTCTTCCCCTTCTCT	0	0	1	1	0	0	0
491331	4	1129422	4	1081892	1	0	GPI8	612.464	477.643	9048.38	6034.86	41.5523	41.5523	0.0465067	0.0465067	CGGAAATACCCGGATAT	CGGAAATACCCGGATTT	0	0	0	1	1	0	0
491953	4	1135621	4	1088097	1	1	RQC1	3511.18	2881.37	60764.2	50600.6	41.7646	41.7646	1	1	AAGTATTACCCTCCCTT	AACTATTA----CCCTT	1	1	4	1	0	0	1
492023	4	1135555	4	1088031	1	1	RQC1	5038.21	4074.83	91111.6	74234.9	51.0961	41.7646	0.93458	1	TAATGTTACCCGTTTAT	TAATATTACCCTGTTAT	1	1	1	2	0	0	1
492485	4	1140700	4	1093176	1	1	MSN5	769.84	794.423	9614.7	9715.34	31.8197	31.8197	0.0566279	0.0566279	CGCCATCACCCGGTAAA	CGCCATCACCCGGTAAA	1	1	0	0	1	0	0
499412	4	1174935	4	1127630	1	0	YPS7	764.204	0	12785.9	129.047	41.7646	8.44811	1	0.00128121	G--GATTACCCTGTTTC	GTATATTCACCTGTTTC	1	0	2	3	0	1	0
500101	4	1174395	4	1127010	1	1	YPS7	1145.16	1252.54	18149.5	19267.8	51.0961	51.0961	0.0534458	0.0534458	CCTCGTTACCCCGAACA	CGTCGTTACCCCGAACA	1	1	0	1	1	0	0
501520	4	1183111	4	1135047	1	1	TRR1	1056.75	664.734	18210.3	11910.6	24.6438	24.6438	0.0172277	0.0172277	GAAGCTAACCCAGCCAA	GAAGCTAACCCAGCCAA	0	0	0	0	1	0	0
502340	4	1185938	4	1137888	1	1	SPC110	791.954	995.777	12929.3	17899.1	41.7646	41.7646	1	1	GAACATTACCCTAATTA	GAACATTACCCTAATTA	1	1	0	0	0	0	1
503991	4	1198973	4	1150865	1	0	TFC6	583.397	121.452	10552.1	1728.66	9.49625	25.1529	4.19228e-05	0.00093458	CTCCTCTGCCTGTCATT	TTCCGTTACCTGTCATT	0	0	2	2	0	0	0
504025	4	1198939	4	1150831	1	0	TFC6	1026.55	452.237	15853.6	6897.25	38.2066	38.2066	0.0566279	0.0566279	CAGTATCACCCGGAAAG	CAGTATCACCCGGAAAG	1	1	0	0	1	0	0
506998	4	1219264	4	1165879	1	1	DXO1	1094.79	836.822	17192.2	13522.4	41.7646	41.7646	0.0534458	0.0534458	TGGGATTACCCCACTAT	TGGGATTACCCCACCAT	1	1	0	1	1	0	0
507289	4	1222604	4	1169231	1	1	VPS74	1527.44	2646.31	21632.1	37196.3	51.0961	51.0961	1	1	AAGAGTTACCCTT---T	AAGCGTTACCCTTTTAT	1	1	0	4	0	0	1
507406	4	1222494	4	1169117	0	1	VPS74	374.855	980.835	5479.78	12595.2	7.31456	11.0904	0.0524835	0.0524835	ACCCATTAGCCTCTTTT	ATCCATTAGCCTCTTTT	1	1	0	1	1	0	0
507746	4	1226682	4	1173349	1	1	BCS1	738.603	1941.64	12300.9	33629	51.0961	51.0961	1	1	TTGAGTTACCCTTAAAG	CTGAGTTACCCTT--AG	1	1	0	3	0	0	1
507832	4	1226598	4	1173266	0	1	BCS1	217.96	814.57	2876.71	11607.8	9.18802	8.51252	7.17905e-05	0.001	GATTTCCACTCTT--CT	GATTTTTAC-CTTTCCT	0	0	3	2	0	0	0
508462	4	1229970	4	1176656	1	1	LSM6	3424.06	2317.74	50135.1	33160.1	46.3069	46.3069	0.93458	0.93458	ACTGTTTACCCGAATGG	ACTGTTTACCCGAATGG	1	1	0	0	0	0	1
508521	4	1229912	4	1176597	1	1	LSM6	7735.25	3224.62	126785	55848.8	9.13416	8.21168	0.000427937	0.000496244	GTGCTTAA----ATCGT	GTGATTCATCCAAT-GT	0	0	5	2	0	0	0
508685	4	1229759	4	1176445	1	1	LSM6	6591.19	3460.79	123921	60381.3	46.3069	46.3069	0.93458	0.93458	ACATTTTACCCGGGGGC	ACACTTTACCCGGGGGC	1	1	0	1	0	0	1
509929	4	1242870	4	1189585	1	0	ATO3	779.311	85.9355	12344.5	1534.26	6.13448	6.22564	0.0935439	0.0016006	ACGCATTAACCTGACAA	ACGCATTAATCAGACAA	1	0	2	0	0	0	0
511040	4	1245985	4	1192692	0	1	MUS81	20.6031	709.338	363.988	10748.7	18.4253	15.1487	0.0072878	0.0713724	GTTGATGACGCGAATAG	GTTGGTTGCCCGC---G	0	1	3	5	0	0	0
511684	4	1251783	4	1198447	1	1	SAC7	2242.52	1420.36	37910.8	20852.4	41.7646	34.2135	1	1	GCATATTACCCTACTGA	GCACCTTACCCTACTAA	1	1	0	3	0	0	1
515981	4	1269882	4	1217105	1	1	HPT1	968.697	830.482	14218.7	12058.4	30.9576	30.9576	0.120833	0.120833	CATCGCTACCCGATTTG	CATCGCTACCCGATTTG	1	1	0	0	1	0	0
518278	4	1294554	4	1241891	1	1	DFM1	584.813	735.301	7392.56	10905.6	46.3069	46.3069	0.93458	0.93458	CCTACTTACCCGTTCGC	CTCGCTTACCCGTACGC	1	1	0	4	0	0	1
521388	4	1305532	4	1252922	0	1	HKR1	0	1209.03	0	16391.3	12.665	41.7646	0.000141607	1	-----------------	CTGGATTACCCTCTCCT	0	1	7	10	0	1	0
521471	4	1305535	4	1253005	0	1	HKR1	0	567.356	0	8799.61	3.53001	31.3451	1.56947e-05	0.0497621	-----------------	ACAAGATACCCTGGTAT	0	1	7	10	0	0	0
525014	4	1322057	4	1269848	1	1	RPN9	876.032	598.079	14676.4	9329.91	46.3069	46.3069	0.93458	0.93458	CATTCTTACCCGCTCCC	CATTCTTACCCGCTTCC	1	1	0	1	0	0	1
531887	4	1350075	4	1298056	1	1	SSN2	619.561	1218.49	9981.82	18826.3	41.5523	41.5523	0.120833	0.120833	CGGCACTACCCGGTCCC	CGGCACTACCCGGTCCC	1	1	0	0	1	0	0
532792	4	1359719	4	1313853	0	1	UTP6	313.973	1122.42	6004.56	21914.6	8.05983	13.9221	0.0136963	0.001	CGCAGTTCCCCTGAGCG	TGCAGTTTCCCTGAGCG	0	0	1	1	0	0	0
533443	4	1359084	4	1313231	1	0	UTP6	620.756	131.117	9856.56	2056.27	6.98264	6.92037	6.73188e-05	0.000904172	AGATATAAGCTTCATTA	AAACATAAGCCACATCG	0	0	2	4	0	0	0
533503	4	1359025	4	1313177	1	0	UTP6	720.047	225.578	11192.7	3479.07	41.5523	41.5523	0.0465067	0.0465067	AGAGAATACCCGGATGA	AAACA-TACCCGGATGG	0	0	1	3	0	0	0
533833	4	1362611	4	1316730	0	1	YHP1	415.698	1659.91	6214.84	28057.5	46.3069	46.3069	0.93458	0.93458	GACCATTACCCGACTAT	CATCATTACCCGACAGT	1	1	0	4	0	0	1
533925	4	1362520	4	1316638	0	1	YHP1	102.244	663.798	2103.45	11267.9	6.16669	6.16669	0.00244084	0.0120944	ATCTGCCCACCTGTGCG	ATCTGCTAACCTGTGCG	0	0	2	0	0	0	0
534705	4	1365918	4	1320057	0	1	TSA2	241.683	575.456	3400.4	7069.97	12.8749	9.49625	0.00432458	0.000116901	GAGCCTCGCCCGCTCCT	GGGCCTCGCCTGTTCCT	0	0	1	2	0	0	0
534748	4	1365875	4	1320014	1	1	TSA2	2100.6	1251.9	30755.2	19173.9	51.0961	51.0961	0.93458	0.93458	GTTTGTTACCCGAGTAA	GTTTGTTACCCGAGTAA	1	1	0	0	0	0	1
535895	4	1369543	4	1323672	1	1	TOM1	897.725	671.792	13898.1	12893.2	51.0961	51.0961	0.93458	0.93458	GCACGTTACCCGACT--	TCCTGTTACCCGACTTA	1	1	0	5	0	0	1
537713	4	1394978	4	1349081	0	1	RMT2	53.0531	803.579	1013.04	12494.6	5.46881	5.99482	0.000616909	0.00334993	CTATTAT-TCTGTTTCC	CTACTATATC-CTTTCA	0	0	3	2	0	0	0
537793	4	1394898	4	1349003	0	1	RMT2	378.254	914.723	5102.43	14108.3	46.3069	46.3069	0.93458	0.93458	CATGCTTACCCGCGCGG	CATACTTACCCGCGCGG	1	1	0	1	0	0	1
542106	4	1412033	4	1365848	1	1	YDR476C	724.092	612.417	10979.1	9866.92	11.197	6.39446	0.0056036	0.0056036	AATTTTTAACGTAAAAG	AATTTTTAACGTAAAAG	0	0	0	0	1	0	0
542176	4	1411963	4	1365778	1	1	YDR476C	1444.94	1411.15	23628.2	22729.8	51.0961	51.0961	1	1	CATAGTTACCCTCTGCA	TGTGGTTACCCTCGGCA	1	1	0	4	0	0	1
543626	4	1417245	4	1371052	1	1	PEX29	913.1	737.066	13593.8	10588.8	37.9012	37.9012	0.0566279	0.0566279	-TTCATCACCCGGCGGA	ATTCATCACCCGGCGGA	1	1	0	1	1	0	0
543670	4	1417202	4	1371008	1	1	PEX29	1732.51	1679.83	29018.3	28057.3	37.9012	37.9012	0.0566279	0.0566279	-TTCATCACCCGGCGGA	ATTCATCACCCGGCGGA	1	1	0	1	0	0	0
543839	4	1417036	4	1370843	0	1	PEX29	519.439	1542.22	12743.1	28611.7	51.0961	51.0961	0.0534458	0.0534458	AGGGGTTACCCCTTCTT	CGGGGTTACCCCTTCCT	1	1	0	2	1	0	0
543879	4	1416996	4	1370804	0	1	PEX29	289.618	1595.41	5411.91	27976.2	51.0961	51.0961	0.0534458	0.0534458	AGGGGTTACCCCTTCTT	CGGGGTTACCCCTTCCT	1	1	0	2	0	0	0
544507	4	1420957	4	1374773	1	0	CWC21	715.988	379.822	11653.6	6666.66	46.3069	46.3069	0.93458	0.93458	-GCCTTTACCCGCACGC	TGCCTTTACCCGCACGC	1	1	0	1	0	0	1
545762	4	1429151	4	1383020	1	1	RIB3	1279.63	2075.04	21421.7	30900.8	26.6005	26.6005	0.0566279	0.0566279	TATGCTCACCCGCCTCG	---GCTCACCCGCCTCG	1	1	0	3	1	0	0
545807	4	1429106	4	1382975	1	1	RIB3	817.669	1271.13	14871.5	22883.8	7.48552	7.48552	0.00261169	0.00261169	TAATAATAGCCTTGCTT	TAATAATAGCCTTGGTT	0	0	0	1	1	0	0
548111	4	1443582	4	1397439	1	1	PUF6	1009.21	542.113	16227.9	11317.5	37.9012	38.2066	0.132343	0.132343	TTAACTAACCCGGCATT	TGAACTAACCCGGAGTT	1	1	0	3	1	0	0
549462	4	1447170	4	1401037	0	1	SEC20	45.7325	618.753	819.105	10017.1	7.7253	7.7253	0.00093458	0.0935439	ATCAATAAATCACCTGC	ACCTAT---TAACCTTC	0	1	4	3	0	0	0
549514	4	1447121	4	1400989	0	1	SEC20	381.422	888.967	6676.75	14804.6	46.3069	46.3069	0.93458	0.93458	TCTATTTACCCGGACAG	TCTATTTACCCGGACTG	1	1	0	1	0	0	1
554169	4	1469183	4	1429161	1	1	GNP1	782.724	755.714	13155.6	13676.7	51.0961	41.7646	0.121659	0.121659	TTGGGTTACCCAGCTTT	T--GATTACCCAGCCTT	1	1	0	4	1	0	0
557575	4	1480265	4	1440275	1	1	FPR2	1679.55	1413.67	26008.9	26398	51.0961	51.0961	0.93458	0.93458	ACCAGTTACCCGTTTAT	ATGTGTTACCCGTTCAT	1	1	0	4	0	0	1
557664	4	1480343	4	1440364	1	1	FPR2	951.929	546.687	13565.9	8834.99	14.3496	8.21082	0.141607	0.00465494	TACTATAACCCTAAGA-	TAGCATAA-CCTAAGAA	1	0	1	3	0	0	0
559148	4	1483686	4	1443687	0	1	URC2	470.052	1628.98	7653.56	25068	10.9936	36.3043	0.00131565	0.0465067	CATAAAAAGCTGATGCT	TGTGAATACCCGTTGCT	0	0	3	4	0	0	0
559195	4	1483639	4	1443640	1	1	URC2	1748.16	2764.14	30939.5	39440.2	51.0961	51.0961	1	1	AACTGTTACCCTCCTTT	--CAGTTACCCT--TCT	1	1	0	6	0	0	1
561903	4	1494166	4	1454202	1	1	HLR1	2114	2141.51	37355.5	36808.9	46.3069	46.3069	0.93458	0.93458	AAATCTTACCCGAACTT	AAATCTTACCCGAACTT	1	1	0	0	0	0	1
562127	4	1496777	4	1456785	0	1	QCR7	280.277	1488.02	6831.94	22061.5	6.19217	15.1012	0.0063851	0.0157294	ATTGTCT----ATAGAT	ATAGCCTACCCATAAAT	0	0	4	3	0	0	0
562228	4	1496680	4	1456688	1	1	QCR7	1029.96	2170.32	20934.4	39811.9	27.9074	27.9074	0.00376881	0.00376881	GCTTTTTATCGGGTCAC	GCTTTTTATCGGGTCAC	0	0	0	0	1	0	0
570128	5	151092	5	148803	1	1	IRC22	1047.37	2163.11	16526.6	33684.4	46.3069	46.3069	0.93458	0.93458	ATTACTTACCCGAACTA	ATCACTTACCCGG-CTA	1	1	0	3	0	0	1
570174	5	151046	5	148758	0	1	IRC22	528.479	844.652	9184.18	13328.5	4.92962	4.88067	0.0113805	0.0113805	TTTGTTTAACCACTAGT	TTTTTTTAACCATTAGT	0	0	0	2	1	0	0
570415	5	150203	5	147916	0	1	WBP1	283.436	1114.79	4858.44	19207.8	36.8576	36.8576	0.132343	0.132343	TTCAATAACCCGCCCTG	TGCGGTAACCCGCCCTG	1	1	0	3	1	0	0
570453	5	150165	5	147878	1	1	WBP1	761.997	2778.87	15021.9	46344.5	41.7646	36.8576	1	0.132343	ATGCATTACCCTAAGCT	ACGCATTATTGTAAGTT	1	1	3	2	0	1	0
572837	5	132728	5	129697	0	1	GLC3	10.0422	931.597	540.208	14960.5	7.31456	7.91603	0.0136963	0.0136963	TGCCCTTCCCCTGGATG	-GCCCTTCCCCTGGTTG	0	0	0	2	1	0	0
572887	5	132778	5	129740	0	1	GLC3	137.119	695.05	2507.38	11109.6	7.67588	8.05043	0.0136963	0.0136963	TGCCCTTCCCCTGGATG	-GCCCTTCCCCTGGTTG	0	0	0	2	0	0	0
573868	5	131072	5	127883	0	1	UBC8	255.815	557.488	4305.54	7567.66	46.3069	46.3069	0.93458	0.93458	AGGTCTTACCCGGATTC	AGGTCTTACCCGGATTC	1	1	0	0	0	0	1
574515	5	131515	5	128509	0	1	UBC8	361.75	952.751	6350.73	14028.4	46.3069	51.0961	0.93458	0.93458	-AGCATTACCCGGTGGA	TAG--TTACCCGGTAGT	1	1	0	5	0	0	1
574561	5	131559	5	128553	1	1	UBC8	1314.52	2333.75	19288.2	34132	46.3069	51.0961	0.93458	0.93458	-AGCATTACCCGGTGGA	TAG--TTACCCGGTAGT	1	1	0	5	0	0	1
574601	5	131599	5	128583	0	1	UBC8	408.741	944.476	8814.24	15248.4	8.29962	15.1012	0.0605918	0.0605918	GGTGCTCACCCTTTTTT	GCTGCTCACCCTTTTTT	1	1	0	1	1	0	0
574913	5	128415	5	125209	1	1	VAC8	1762.98	940.024	32170.7	17136.3	25.1529	25.1529	0.00298092	0.00298092	CTGTTATACCGTTACCT	CAGTTATACCGTTACCT	0	0	0	1	1	0	0
574975	5	128477	5	125270	1	1	VAC8	5554.28	4028.01	78882.7	58210.8	46.3069	46.3069	0.93458	0.93458	GCTCATTACCCGGGAAA	GCTCATTACCCGGGAAA	1	1	0	0	0	0	1
575036	5	128537	5	125331	1	1	VAC8	1041.75	1184.62	16172.6	19980.6	7.34944	7.34944	0.000513042	0.000513042	ATCAATTACTGGAAAGG	ATCAATTACTGGAAAGG	0	0	0	0	1	0	0
575351	5	126440	5	123230	1	1	NPP2	898.651	1028.72	15499.2	17718.8	41.7646	41.7646	1	1	TATTA---CCCTGGATT	TATTATTACCCTGGATT	1	1	3	0	0	0	1
576007	5	123465	5	120280	0	1	GTT3	52.9947	652.543	734.716	10236.8	6.49493	8.18161	0.00093458	0.0874242	GCACATTAACAGCTCGG	GCGCATTAACCGCTCGG	0	1	1	1	0	1	0
577136	5	111260	5	107826	1	1	YEL023C	2714.29	2935.81	46228.4	48060.3	8.62677	9.65883	0.000240098	0.000120833	-TACATTGGCGTTTAAA	CTATATTGGTGTTGGAA	0	0	1	4	0	0	0
577197	5	111199	5	107765	1	1	YEL023C	5099.84	4999.11	74570.7	74851	46.3069	46.3069	0.93458	0.93458	TTTCATTACCCGACTTG	TTTCATTACCCGACTTG	1	1	0	0	0	0	1
578874	5	101606	5	98161	1	1	SNU13	675.67	603.036	10467.5	9931.35	6.63698	23.9194	0.000732821	0.000732821	GAGGCCCAACCTTATCA	GTGACCCAACCTTATCG	0	0	0	3	0	0	0
578934	5	101663	5	98221	1	1	SNU13	2041.06	2074.7	37370.7	38340	46.3069	46.3069	0.93458	0.93458	ATTTATTACCCGGATAA	ACGTATTACCCGGATAG	1	1	0	3	0	0	1
580749	5	100489	5	97049	1	0	VMA3	543.29	121.399	9937.72	2259.52	6.47874	7.27342	0.00053044	6.29148e-05	TGAAATAGGCCGTCTAC	TGAAAT--------CAA	0	0	6	4	0	0	0
580783	5	100523	5	97075	0	1	VMA3	414.05	786.042	8678.23	13394	6.47874	7.27342	0.00053044	2.63958e-05	TGGAATAGGCCGTAGAC	TGAACAAGGCCGTGGAC	0	0	1	3	0	0	0
583345	5	84813	5	80856	1	1	HYP2	3245.55	1678.26	49409.9	28078	13.7478	15.1487	0.00432458	0.0713724	TGGGGTCGCCCGCCTTG	TACGGTTGCCCGCCTTG	0	1	1	2	0	1	0
583376	5	84844	5	80886	1	1	HYP2	1321.71	561.778	20671.7	12482.8	13.3898	5.79604	0.00161155	0.000857289	TTGATTAAA-CCAACAT	TTGTTTAAACCCAACGT	0	0	1	2	0	0	0
583588	5	85054	5	81087	1	0	HYP2	1090.93	47.8755	18646	930.833	34.2135	11.0247	1	0.129291	AAAGTT-TACCCTTTCT	AAAGTTCTACCCTTTCT	1	1	1	0	0	1	0
585851	5	80302	5	76332	1	1	CYC7	6902.51	3970.54	111536	67525.3	37.9012	37.9012	0.132343	0.132343	CGCTATAACCCGGCTGC	CGCAATAACCCGGCTGC	1	1	0	1	1	0	0
585926	5	80228	5	76258	1	1	CYC7	3443.93	2084.26	56732.8	34667.9	13.4395	13.4395	0.00380025	0.00380025	AATAAATGCCCTCGCTA	AA-AAATGCCCTCGCTA	0	0	0	1	1	0	0
587408	5	73468	5	69529	1	1	GDA1	654.362	994.038	9256.76	17195.1	51.0961	51.0961	1	1	TACCGTTACCCTATTGA	TACGGTTACCCTATCG-	1	1	0	3	0	0	1
592157	5	58216	5	56228	1	1	VMA8	1587.85	1594.21	26909.7	26530.3	51.0961	51.0961	0.93458	0.93458	TTT-GTTACCCGAATGC	TTTCGTTACCCGAACGA	1	1	0	3	0	0	1
592190	5	58248	5	56261	1	0	VMA8	917.032	498.034	12670.6	6131.16	51.0961	51.0961	0.93458	0.93458	TTT-GTTACCCGAATGC	TTTCGTTACCCGAACGA	1	1	0	3	0	0	1
597985	5	33805	5	31988	1	1	CAN1	782.646	1840.97	11665.6	27673.3	38.2066	38.2066	0.0566279	0.0566279	ATGACTCACCCGGAAAC	ATGACTCACCCGGAATT	1	1	0	2	1	0	0
598022	5	33768	5	31951	0	1	CAN1	388.935	793.671	5532.96	10164.1	5.93408	5.93408	0.0935439	0.0935439	TTATCTTAACCTTATCG	TTATCTTAACCTTATCG	1	1	0	0	1	0	0
602727	5	13509	5	5343	0	1	RMD6	171.536	972.089	2313.04	14736.2	29.6543	7.99372	0.000132343	0.00465494	GATCAATAACTTTACTT	GAACGATAAC-CTACTT	0	0	2	2	0	0	0
602829	5	13607	5	5441	0	1	RMD6	4.57847	1709.88	68.6771	26491.7	5.25323	46.3069	0.00916399	0.93458	ACTGTTTTGT-GCATAT	GGTGTTTACCCGCATAT	0	1	4	2	0	1	0
603836	5	156565	5	154330	1	0	NOP16	1332.92	13.9425	19616.7	260.261	18.0195	6.39894	0.121659	0.0935439	ATTTTAC--CCAGCACG	CTTTTATTGCTGGCATG	1	1	5	2	0	0	0
603881	5	156605	5	154375	1	1	NOP16	2710.13	759.403	47729.2	11761.1	51.0961	51.0961	0.93458	0.93458	AAACGTTACCCGAACAG	AAGAGTTACCCGTACAT	1	1	0	4	0	0	1
605730	5	172027	5	169803	1	0	SEC3	942.967	163.532	15896.6	3922.21	5.74053	6.47418	0.00318007	0.00376881	CTTACTTATCAGCCTAA	GTTGCTTATCGGCCTGA	0	0	1	3	0	0	0
605770	5	171987	5	169763	1	1	SEC3	2491.29	1345.4	32913.6	18203	31.8197	36.8576	0.0566279	0.132343	CTATGTCACCCGGTATT	CCATGTAACCCGGTATT	1	1	1	1	0	0	0
609716	5	178666	5	176175	1	1	PRP22	663.994	1198.4	11441.5	18808.2	51.0961	51.0961	0.93458	0.93458	TTATGTTACCCGCATGA	TTATGTTACCCGTATAA	1	1	0	2	0	0	1
609779	5	178723	5	176238	0	1	PRP22	271.363	759.637	4812.24	11893.5	10.2673	6.82776	0.0108143	0.0108143	----GTAGCCCTACATT	TTATGTATCCTTCGATT	0	0	2	6	0	0	0
612304	5	196771	5	193400	1	1	RPN3	568.929	735.649	9473.58	10869.3	51.0961	51.0961	0.93458	0.93458	TTTTGTTACCCGGGATA	TT--GTTACCCGGGTTA	1	1	0	3	0	0	1
612343	5	196810	5	193437	1	1	RPN3	2263.56	2851.71	33111.5	44996.2	51.0961	51.0961	0.93458	0.93458	TTTTGTTACCCGGGATA	TT--GTTACCCGGGTTA	1	1	0	3	0	0	1
613633	5	205074	5	201664	1	1	GCD11	939.985	601.519	14861.3	8072.05	38.2066	42.3227	0.132343	0.00093458	GTCAGTAACCCGGACCA	GACAGTGACCCGGCCGG	1	0	1	4	0	0	0
616555	5	221672	5	218471	1	1	ZRG8	710.136	5714.03	12980.7	88483	41.5523	42.4042	0.0874242	0.120833	AACCGATACCCGGATTG	GAC-GCTACCCGCCTTT	1	1	1	5	0	0	0
616631	5	221596	5	218395	0	1	ZRG8	405.154	5125.26	7838.54	99209.4	36.3043	46.3069	0.120833	0.93458	CTTC--TACCCGTTTGG	-TTCTTTACCCGTTTGG	1	1	1	2	0	1	0
618143	5	229583	5	226308	0	1	GLN3	510.22	694.777	8017.55	9980.28	46.3069	38.2066	0.93458	0.132343	CTCTATTACCCGGCGGA	CTGTA--ACCCGGAGGA	1	1	2	2	0	1	0
626114	5	254590	5	251024	1	0	RSM18	1171.6	163.678	18723.2	2819.82	15.1208	10.1469	0.00737155	0.141607	TCTTCTTACTCATTATA	TCTTTTAACCCTTTGCA	0	1	3	3	0	0	0
626175	5	254530	5	250963	1	1	RSM18	2631.54	1154.79	37291.8	18993	51.0961	51.0961	1	1	ACAGGTTACCCTACAAT	ACCCGTTACCCTACAAC	1	1	0	3	0	0	1
627950	5	260191	5	256612	1	1	PIC2	958.659	602.092	14185.5	8556.07	41.7646	41.7646	1	1	TACCATTACCCTCTCAG	CGCCATTACCCTCTCGG	1	1	0	3	0	0	1
628236	5	259930	5	256343	0	1	PIC2	175.253	640.611	3799.5	9539.26	9.6631	46.3069	0.0490501	0.93458	TTTGGTTAGCCGAGATC	TTTGCTTACCCGAGATC	1	1	1	1	0	1	0
629730	5	266236	5	262663	0	1	HIS1	161.135	1155.11	2687.78	14414.4	8.21082	7.04591	0.000566316	9.16399e-06	GTCACATAACCACTAGT	------------CTA--	0	0	7	7	0	0	0
629763	5	266203	5	262655	1	1	HIS1	4032.19	1047.47	61403.9	19902.1	37.9012	37.9012	0.132343	0.132343	AGATGTAACCCGGCAAC	ATTTAT--------AAC	1	1	6	5	0	0	0
629830	5	266136	5	262596	1	0	HIS1	1969.91	228.199	33201	4227.69	7.58211	7.91603	0.000282051	0.000857235	TTTAATTAATTTTTTGA	T--AATTAATCTCTCGA	0	0	1	4	0	0	0
629863	5	266103	5	262565	1	1	HIS1	671.067	1005.61	11256.2	15633.7	5.22507	6.59917	1.13805e-05	0.000857235	TTTAATTAATTTTTTGA	T--AATTAATCTCTCGA	0	0	1	4	0	0	0
631762	5	271630	5	268080	1	1	HMF1	891.674	869.549	15631.6	14619.1	51.0961	51.0961	0.0534458	0.0534458	CGGGGTTACCCCTAAAT	CGGGGTTACCCCTAAAT	1	1	0	0	1	0	0
634037	5	281481	5	277990	1	1	GPP2	2302.94	1540	36993.7	25033.7	46.3069	46.3069	0.93458	0.93458	TTTTATTACCCGG--CG	TTTTATTACCCGGACCC	1	1	0	3	0	0	1
634077	5	281441	5	277951	1	0	GPP2	1000.67	231.499	14930.8	3855.73	13.0336	10.5306	0.0935439	0.00566799	ATTGCTTAACCTAC---	ATTAGTCAACCTCCTTA	1	0	1	6	0	1	0
634217	5	281307	5	277812	0	1	GPP2	11.4462	2185.02	199.163	36914.5	7.92456	9.25214	0.00362966	0.000474372	GTTTTTCACCGTTTCCC	GTTGTTCACTGTTTTTC	0	0	1	3	0	0	0
634252	5	281274	5	277778	0	1	GPP2	74.7353	1569.94	1353.01	28524.6	7.92456	9.25214	0.000869107	0.00265958	ATGTTATA--CCCTCTC	GTATTATACCCCCTCTC	0	0	2	2	0	0	0
634349	5	281179	5	277685	0	1	GPP2	6.34898	4879.03	317.387	82195.7	8.11653	34.2135	0.0046273	1	GCACCTCGCCCTGAACG	GCACCTTACCCTGGACG	0	1	2	1	0	1	0
635369	5	284805	5	281258	0	1	VHR2	209.005	804.049	3845.42	13968.5	51.0961	51.0961	0.93458	0.93458	ATCGGTTACCCGTTTGC	ATTGGTTACCCGTTTTC	1	1	0	2	0	0	1
635404	5	284770	5	281223	1	1	VHR2	992.321	2385.2	15456.5	34768.2	51.0961	51.0961	0.93458	0.93458	ATCGGTTACCCGTTTGC	ATTGGTTACCCGTTTTC	1	1	0	2	0	0	1
635448	5	284726	5	281179	0	1	VHR2	267.598	1009.54	4358.04	15700.3	5.94319	5.94319	0.000699839	0.000556557	GCCTTTTGCTCTTGAGA	GCCTTTTGCTTTTTAGA	0	0	1	1	0	0	0
637277	5	287546	5	284035	0	1	ICL1	354.408	796.532	7826.84	12041.3	6.94039	8.44811	0.000654056	0.000654056	TTCCCTTGCTCGCAACT	TTCTTTTGCTCGCAACT	0	0	0	2	1	0	0
637447	5	287405	5	283880	1	1	ICL1	997.863	2484.15	18458	31767.6	38.2066	38.2066	0.132343	0.132343	TCTCGTAACCCGGATGC	TCAGCTAACCCGGATGG	1	1	0	4	1	0	0
637545	5	287318	5	283788	0	1	ICL1	246.489	829.501	3288.34	10610.8	11.9696	6.70388	0.00408157	0.00408157	CCCTTTTGCCCCAGGTT	CCCTTTTGCCCCAGATT	0	0	0	1	1	0	0
637577	5	287286	5	283756	0	1	ICL1	320.349	746.288	4868.51	11707.4	11.9696	6.19962	0.00381212	0.00381212	TCCATTCATCCGAGCGA	TCCATTCATCCGAGAGG	0	0	0	2	1	0	0
639370	5	292775	5	288689	1	1	MOT2	4887.66	14646.7	142292	228001	46.3069	51.0961	0.93458	0.93458	TGCTATTACCCGAAC-T	--CTGTTACCCGAACTT	1	1	0	4	0	0	1
639441	5	292840	5	288752	1	1	MOT2	12384.8	13467	204596	219583	51.0961	38.2066	0.93458	0.0566279	AT--GTTACCCGGGAAG	ATTTGTCACCCGGAAAT	1	1	1	4	0	1	0
640887	5	298543	5	294424	1	1	RNR1	7592.63	5967.48	128308	96017.5	46.3069	46.3069	0.93458	0.93458	TGAACTTACCCGAC-AC	TGGCCTTACCCGACCAC	1	1	0	3	0	0	1
641011	5	298667	5	294547	1	1	RNR1	4592.13	3604.62	63985.8	46852.9	5.97399	5.97399	0.00093458	0.00093458	CGTTTTTACGCGTCCTC	CGTTTTTACGCGTCCTC	0	0	0	0	1	0	0
648834	5	326151	5	322082	1	1	UTP7	1015.16	568.873	16390.6	9056.95	36.8576	36.8576	0.132343	0.132343	TCTCATAACCCGACATT	TCTCATAACCCGACATT	1	1	0	0	1	0	0
648912	5	326074	5	322007	1	0	UTP7	670.123	293.186	10120.7	4071.97	11.197	4.99587	0.0599034	5.4163e-05	TTTTCTTACCGTTTTTC	TTTTCTTTTC-TTTTTC	1	0	3	0	0	0	0
649575	5	327174	5	323112	1	1	GET2	1297.11	1651.56	18559.3	24192.7	23.9194	23.9194	0.00323838	0.00323838	CGGGGTCACCCCAAATT	CGGGGTCACCCCAAATT	0	0	0	0	1	0	0
649622	5	327127	5	323065	1	0	GET2	674.709	370.908	10521	7865.08	23.9194	23.9194	0.000274766	0.000699839	TATTCTTGTTCTTTTGT	-----TTGCTCTTTTGT	0	0	1	5	0	0	0
649657	5	327092	5	323037	0	1	GET2	419.578	804.343	7739.65	13115.4	5.04779	6.43964	0.000407549	0.000407549	TGTACATATCCATATCA	TGTACATATCCATATCG	0	0	0	1	0	0	0
649918	5	328312	5	324260	1	1	YER085C	1016.35	1706.97	17393.8	27419.5	42.4042	42.4042	0.120833	0.120833	ATTTGCTACCCGCTGCG	ACTTGCTACCCGCTGCG	1	1	0	1	1	0	0
649961	5	328269	5	324220	0	1	YER085C	235.828	563.978	4446.57	9250.6	42.4042	42.4042	0.120833	0.120833	ATTTGCTACCCGCTGCG	ACTTGCTACCCGCTGCG	1	1	0	1	0	0	0
652596	5	349750	5	345662	1	1	PUP3	2130.12	1148.75	34514.5	18517.4	51.0961	51.0961	1	1	CTTCGTTACCCTATGCT	CTTCGTTACCCTATGCT	1	1	0	0	0	0	1
652751	5	349600	5	345521	1	0	PUP3	1103.54	334.055	18116	12139.9	11.9696	10.3996	0.0599034	0.000945428	AACATTTACCGTCCATT	--CATTT-CGGTCTATT	1	0	2	3	0	0	0
660110	5	372174	5	368251	1	1	NUP157	920.245	1077.61	14462	16264.9	46.3069	51.0961	0.93458	0.93458	AAGTATTACCCGACTTT	A--TGTTACCCGGATTT	1	1	0	5	0	0	1
660192	5	372094	5	368175	1	1	NUP157	678.978	720.188	10973.7	11989.6	8.44339	4.79242	0.000616909	0.000616909	AGATTTTATTCTTAATT	AGATTTTATTCTCATTT	0	0	0	2	1	0	0
661646	5	387054	5	383108	0	1	SWI4	180.475	543.141	2906.54	7821.52	4.30802	29.6543	0.000122023	0.00848272	TCGTGAAATCGTAGTAT	TGGT--AACCGTAATAA	0	0	2	4	0	0	0
662339	5	386408	5	382461	0	1	SWI4	334.815	1190.84	5318.26	19837.4	51.0961	51.0961	0.93458	1	TACAATTACCTTCGGCG	TACGTTTACCCTCGGCG	1	1	1	2	0	0	1
668789	5	422743	5	418710	1	0	COM2	721.793	498.565	12189.5	7746.62	11.8934	7.25495	0.00848272	0.00109674	ACTCGTAACCGTAAATG	ACTTGCAACCGTAACTG	0	0	1	2	1	0	0
668869	5	422663	5	418631	1	1	COM2	2247.5	2594.22	32206.9	34886.7	17.2226	18.0587	0.0713724	0.0713724	AGTTGTTGCCCGGCGCG	GGTTGTTGCCCGGAGCG	1	1	0	2	1	0	0
668933	5	422599	5	418567	1	1	COM2	581.163	849.021	9021.76	12466.6	8.81745	7.78159	0.000562953	0.00105889	GTCGCCCATTCAGCTAT	CTCGCCTATCCAGCTAT	0	0	2	1	0	0	0
670764	5	439288	5	440708	1	0	YER134C	2435.87	0	47420.5	0	51.0961	5.36374	1	0.00045602	TTAGGTTACCCTTATGT	TTA--------TTTTGT	1	0	6	3	0	1	0
670790	5	439262	5	440703	1	0	YER134C	1619.45	16.7224	26646.7	284.28	7.12088	5.36374	0.00818995	0.00045602	CTCTATTATCCAACA--	CTATATTTTTGAAAAAT	0	0	3	4	0	0	0
674299	5	439400	5	441770	0	1	GDI1	215.674	555.776	3747.53	9100.88	8.91939	8.91939	0.00359791	0.00359791	CTGATTTATCCCGATTT	CTGATTTATCCCGATTT	0	0	0	0	1	0	0
675667	5	442341	5	444720	1	1	YER137C	762.638	803.425	13356.6	14235.5	27.9074	27.9074	0.00818995	0.00818995	GAGTTTTATCCAGCGTC	GAGTTTTATCCAGCGTC	0	0	0	0	1	0	0
676623	5	453283	5	449289	1	1	COX15	1002.76	637.384	15478.7	10538.6	18.9347	16.6304	0.00704664	0.00704664	AAAAGAAACCCTGCTTA	AAAAGAAACCCTGATTA	0	0	0	1	1	0	0
676662	5	453321	5	449328	1	0	COX15	601.519	301.268	9661.64	4588.74	18.9347	16.6304	0.00704664	0.00704664	AAAAGAAACCCTGCTTA	AAAAGAAACCCTGATTA	0	0	0	1	0	0	0
677668	5	462469	5	458463	1	1	FTR1	2326.66	6234.52	65225.3	89755.1	41.5523	41.5523	0.120833	0.00181261	TTTTGCTACCCGG----	---GGGTACCCGGGACT	1	0	1	8	0	0	0
677756	5	462394	5	458391	1	1	FTR1	5326.26	5392.96	78805.1	79178.5	46.3069	41.5523	0.93458	0.120833	TTTTATTACCCGGATGC	CTTTGCTACCCGGATGT	1	1	1	3	0	1	0
680760	5	472607	5	468785	1	1	UBP3	928.126	871.447	15480.9	14933.3	41.7646	51.0961	1	1	AAAAATTACCCTCTT--	CAGGGTTACCCTCTTTT	1	1	0	6	0	0	1
682072	5	484638	5	480850	1	0	YER156C	1506.91	169.352	24642.4	2939.5	51.0961	51.0961	1	1	TGAGGTTACCCTGTATA	TGTAGTTACCCTGCAGA	1	1	0	4	0	0	1
682229	5	484491	5	480697	1	1	YER156C	878.135	1323.31	18014.6	22343.1	13.3898	7.54986	0.00115975	0.001	G----TAATCCAAAGAC	TGTGATACTTCAAAGAT	0	0	2	6	0	0	0
682323	5	484408	5	480609	0	1	YER156C	84.1308	702.554	1674.11	10531.5	9.13416	5.75637	0.000339532	0.000577977	TTCGATAGTATTAACAC	GTCGATAGCCCCAACAC	0	0	4	1	0	0	0
684954	5	492332	5	488028	1	1	BUR6	4426.95	2756.7	62011.6	50232.3	37.9012	46.3069	0.132343	0.93458	ACAGATGCCGGGTTACG	----ATACCGGGT----	1	1	1	8	0	1	0
685066	5	492238	5	487934	1	1	BUR6	561.894	1603.73	16286.2	23647.7	4.58094	4.98592	0.000922021	0.000922021	AATTCTTCTCCTTAAAT	AATTCTTCTCCTTAAAT	0	0	0	0	1	0	0
685116	5	492188	5	487885	1	1	BUR6	3575.35	815.041	58047	20540.7	7.83054	7.83054	0.00400808	0.0072383	TCACGCTACCTGACAAA	TCACGCTACCGGACCAA	0	0	1	1	0	0	0
685649	5	503058	5	493506	1	0	RAD4	649.003	146.599	10640.1	2139.56	5.76601	4.57128	0.00128121	0.000282051	TTTCATTCACCTGTATT	-TTCGATCACTTGTATT	0	0	2	2	0	0	0
685681	5	503026	5	493477	1	0	RAD4	601.354	193.502	8505.34	2517.25	8.37315	8.37315	0.000922021	0.001	CTTTTCTACCATCTATA	CTTTTTTACCATCTATA	0	0	1	0	0	0	0
685736	5	502971	5	493422	1	0	RAD4	961.488	39.9599	12909.3	993.402	9.58096	5.10824	0.0874242	0.0120944	GGTACTTAACCGCATTT	GCTACCTAACCTCAATT	1	0	2	2	0	0	0
686051	5	504924	5	495361	1	0	GCG1	1081.13	526.401	15910.9	11910.5	51.0961	51.0961	1	1	TACTGTTACCCTCTCGT	TACTGTTACCCTCTCGT	1	1	0	0	0	0	1
687018	5	503989	5	494431	1	1	GCG1	877.529	542.854	14077.9	9706.84	8.19908	5.4782	0.00161155	0.00161155	TCATATAAACCACTAGG	TCATATAAACCACTGGG	0	0	0	1	0	0	0
687078	5	503929	5	494376	0	1	GCG1	168.442	1049.22	2415.54	13303.9	12.8749	6.70388	0.00359791	0.000857289	CC-AATTATCCCGCTCC	CCGAATTTTTCCGCTCC	0	0	2	1	0	0	0
687131	5	503878	5	494323	1	1	GCG1	1893.19	2298.3	31703.8	37366.1	51.0961	51.0961	0.121659	0.93458	TAGCGTTACCCAGAATA	TAGCGTTACCCGAAACA	1	1	1	2	0	1	0
688563	5	517645	5	508091	1	1	BCK2	3555.11	992.567	56717.5	14097.1	38.2066	38.2066	0.132343	0.132343	CCGGTTAACCCGGATCG	GCAATTAACCCGGATCG	1	1	0	3	1	0	0
688602	5	517684	5	508130	1	0	BCK2	2883.28	403.19	34953.7	5742.88	38.2066	38.2066	0.132343	0.132343	CCGGTTAACCCGGATCG	GCAATTAACCCGGATCG	1	1	0	3	0	0	0
692779	5	541571	5	532054	1	1	ECM32	1551.27	939.757	24750.3	15632.5	46.3069	46.3069	0.93458	0.93458	ATCCATTACCCGACTAC	AGCCATTACCCGGCCTC	1	1	0	4	0	0	1
692814	5	541606	5	532088	1	0	ECM32	772.838	304.598	12253.4	5071.71	4.72166	6.93943	0.000555263	0.00566799	CATTTTAAGACTCTAAA	CATTTTCAACCTTTAAC	0	0	3	2	0	0	0
692986	5	545068	5	535565	0	1	BMH1	0	2700.04	27.4708	39399.4	9.44277	41.5523	0.00634173	0.120833	-CCGCCTAGCCGGCTAG	CCCGCCTACCCGGCTAG	0	1	1	1	0	1	0
693836	5	546648	5	537137	1	0	PDA1	829.529	16.7224	11178.2	386.026	46.3069	46.3069	0.93458	0.93458	GACATTTACCCGGTTGA	GACATTTACCCGG----	1	1	0	4	0	0	1
693874	5	546682	5	537171	1	1	PDA1	1249.87	593.276	17078.2	7874.2	46.3069	46.3069	0.93458	0.93458	GACATTTACCCGGTTGA	GACATTTACCCGG----	1	1	0	4	0	0	1
698300	6	130063	6	150792	1	1	SEC4	1521.15	1490.68	26662.8	25233.3	46.3069	46.3069	0.93458	0.93458	ATTTATTACCCGGCAC-	AATTATTACCCGGCACC	1	1	0	2	0	0	1
698367	6	130129	6	150859	1	1	SEC4	816.301	556.195	14566.3	9946.96	8.05043	7.31456	0.001	0.00465494	TTGGTATAACGTTTCCC	TTGGTATAACCTTTCCC	0	0	1	0	0	0	0
698640	6	123208	6	143929	0	1	BLM10	304.55	1173.37	5061.94	16416.7	51.0961	27.9074	1	0.0605918	TTGGGTTACCCT-GGAA	TCGGGTCACCCTTGGCA	1	1	1	3	0	1	0
698662	6	123229	6	143948	1	0	BLM10	1377.61	134.565	20661.3	6011.69	51.0961	27.9074	1	0.0605918	TTGGGTTACCCT-GGAA	TCGGGTCACCCTTGGCA	1	1	1	3	0	1	0
698701	6	123268	6	143987	1	0	BLM10	1043.17	321.798	14729.9	4710.46	13.0336	11.6662	0.000953075	0.000953075	GGCCGCCACCCACCACA	GGGCGCCACCCACCGCG	0	0	0	3	0	0	0
700751	6	110089	6	130970	0	1	IES1	208.274	561.873	4507.1	9035.61	10.0769	10.0769	0.00280502	0.000200672	TTTTCTTAGCCCATATT	TTTTCTTGGGCCATATT	0	0	2	0	0	0	0
701106	6	106423	6	127293	1	1	HSP12	16025.8	17752.4	259801	272626	41.7646	41.7646	1	1	ACATATTACCCTTCTTT	ACATATTACCCTCCTTT	1	1	0	1	0	0	1
701140	6	106455	6	127327	1	1	HSP12	14284.2	17536.5	259265	280668	51.0961	51.0961	1	1	ACATATTACCCTTCTTT	ACATATTACCCTCCTTT	1	1	0	1	0	0	1
701173	6	106488	6	127356	1	1	HSP12	13500.9	24991.5	215223	396988	51.0961	51.0961	1	1	-TCTGTTACCCT---CT	ATATGTTACCCTGACC-	1	1	0	6	0	0	1
704254	6	95596	6	116029	1	1	FRS2	1805.48	1569.29	29676.4	27293.2	38.2066	38.2066	0.0171107	0.0171107	ACCAGCAACCCGGATCT	ATGAGCAACCCGGATCT	0	0	0	2	1	0	0
704540	6	95416	6	115764	1	1	FRS2	12608	811.959	211468	11278.7	10.4495	8.16613	0.00929091	0.000157875	CTAGCTTGCCCAA----	CTAACAT----AACTCA	0	0	5	5	0	0	0
704606	6	95351	6	115701	1	1	FRS2	19127.1	7139.72	305750	115779	42.3227	27.9074	0.00093458	0.00093458	TTAGGTGACCCGGCTTT	TTAGGTGACCCGCCTTT	0	0	0	1	1	0	0
704636	6	95321	6	115671	1	1	FRS2	25291.4	6555.45	414498	118424	46.3069	51.0961	0.93458	0.93458	GGGT-TTACCCGGTCGA	-GGTGTTACCCGCTTGA	1	1	0	4	0	0	1
704673	6	95285	6	115639	1	1	FRS2	1742.16	1165.98	25770.6	16213.8	46.3069	51.0961	0.93458	0.93458	GGGT-TTACCCGGTCGA	-GGTGTTACCCGCTTGA	1	1	0	4	0	0	1
704742	6	95220	6	115582	1	1	FRS2	3923.79	1150.02	58943.9	19675.8	5.0144	8.51252	0.000125513	0.000125513	CTTTGTTCCTCTCTACG	CTTTGTTCCTCTCTACG	0	0	0	0	0	0	0
705113	6	90874	6	111276	1	0	EPL1	630.08	384.716	9592.81	6096.03	51.0961	46.3069	0.93458	0.93458	TAGGGTTACCCGTATAT	TAATATTACCCGTATAT	1	1	0	3	0	0	1
705221	6	90769	6	111169	1	0	EPL1	573.056	118.049	9315.1	2536.6	8.40394	8.03374	0.000861703	0.000616909	AAATTTTCTCCGTCGGC	AAATTTTCTCGGTCGGC	0	0	1	0	0	0	0
709490	6	58452	6	78846	1	0	RPO41	685.913	60.8737	11699	1097.59	18.0195	11.4372	0.121659	0.00818995	ACAATTTACCCAGAATT	ACAATTTATCCAAAAAA	1	0	1	3	0	1	0
710247	6	55209	6	75627	1	1	ACT1	9534.7	18129.9	161623	313805	46.3069	46.3069	0.93458	0.93458	CA-GCTTACCCGCTTCC	CATGCTTACCCGCTCCC	1	1	0	2	0	0	1
710377	6	55083	6	75502	1	1	ACT1	8566.25	16424.3	118207	218192	46.3069	46.3069	0.93458	0.93458	CTTCTTTACCCGCCACG	CCTCTTTACCCGCCACG	1	1	0	1	0	0	1
713818	6	27701	6	26891	0	1	ZNF1	30.1024	559.279	404.381	9251.78	9.19339	8.15394	0.00129768	0.00093458	CTAAGTAACTCTCGAGC	CTAAGAAACTCTCGAGC	0	0	1	0	0	0	0
713879	6	27762	6	26951	0	1	ZNF1	24.4206	1131.6	439.163	18685.6	9.0794	38.2066	0.00065917	0.00792778	TGTAATAATCGGGAATA	TCTAATAA-CCGGTATA	0	0	2	2	0	0	0
717512	6	149896	6	163783	0	1	NIC96	362.348	749.219	6129.12	11805	46.3069	46.3069	0.93458	0.93458	TATTATTACCCGGTCTT	AATCATTACCCGGTATT	1	1	0	3	0	0	1
727068	6	183091	6	197181	0	1	IGD1	69.0193	636.115	1617.1	11903.6	13.5554	13.5554	0.000829886	0.000418693	CAT-CTCCCCCTGATCT	CATCCCCCCCCTGATCT	0	0	1	1	0	0	0
734276	6	224894	6	238612	0	1	QCR6	156.21	577.053	2308.09	9628.92	29.6713	29.6713	0.00987374	0.00987374	CAATACTGCCCTTAAGA	CAATACTGCCCTTAAGA	0	0	0	0	1	0	0
734700	6	226115	6	239840	1	1	PHO4	2372.57	2195.28	40899	39408.3	42.3227	42.3227	0.00318007	0.00318007	CCGGGTCAGCCTTTCGC	CCGGGTCAGCCTTTCGC	0	0	0	0	1	0	0
734766	6	226049	6	239774	1	1	PHO4	1124.58	959.953	17270.7	14430.1	7.38437	7.38437	0.000869107	0.00048762	GAGTCTTGACCATAGAA	GAGTCTTGGCCATAGAA	0	0	1	0	0	0	0
735571	6	229322	6	242952	0	1	RSC8	402.713	554.496	8022.9	9812.31	26.6005	26.6005	0.0566279	0.0566279	-TTTGTCACCCGCTTGA	GTTTGTCACCCGCTTGA	1	1	0	1	1	0	0
739053	6	250043	6	263611	1	1	PRE4	1207.1	1480.8	20109.9	24096.4	51.0961	51.0961	0.93458	0.93458	AG-GGTTACCCGTCAAT	-GCGGTTACCCGTCAGT	1	1	0	3	0	0	1
739087	6	250010	6	263580	1	0	PRE4	670.31	160.752	11945.2	4522.02	51.0961	51.0961	0.93458	0.93458	AG-GGTTACCCGTCAAT	-GCGGTTACCCGTCAGT	1	1	0	3	0	0	1
739110	6	249987	6	263557	0	1	PRE4	230.572	579.235	4376.04	8768.98	7.87807	7.87807	0.00161155	0.00334993	TAAAGATGTTCCAGCTT	TGAAGATATCCTAGCTT	0	0	3	1	0	0	0
739333	6	252429	6	266000	0	1	RET2	353.847	571.67	5952.51	8917.58	12.3557	11.3895	0.001	0.00792778	AATTTCAATGGGTGGCA	AACTATAACCGGTGGCA	0	0	3	2	0	0	0
739406	6	252359	6	265934	1	1	RET2	1109.9	678.172	18906.4	13768.3	41.7646	34.2135	1	1	CTTTATTACCCTGTCGG	CTTGCTTACCCTGTCGG	1	1	0	2	0	0	1
739828	6	251970	6	265549	1	1	RET2	1229.54	900.233	20931.7	15369	46.3069	46.3069	0.93458	0.93458	TATTATTACCCGCCCTG	TACCATTACCCGCCCTG	1	1	0	2	0	0	1
743108	7	494395	7	495590	1	1	CDH1	903.625	1332.47	13417	19943.5	46.3069	46.3069	0.93458	0.93458	GTTTCTTACCCGAAGAA	GTTTCTTACCCGAAGAA	1	1	0	0	0	0	1
748867	7	448711	7	449941	1	0	TRP5	2927.83	348.883	51431.7	7087.64	46.3069	46.3069	0.93458	0.93458	CCTTATTACCCGAAAGG	-CTTATTACCCGAAAGG	1	1	0	1	0	0	1
748956	7	448624	7	449858	1	0	TRP5	1690.93	473.526	26087.7	7128.28	7.32072	7.32072	0.00667645	0.00667645	C-TTCTTGACCGTGGAA	CTTTTTTGACCGTGGTA	0	0	0	3	1	0	0
752900	7	433906	7	434421	1	0	MIG1	945.21	332.707	15598	6256.39	6.32774	5.94884	0.000548955	0.0136963	GCACGTTTCCTTCGCGC	ACACGTTCCCCTCGCGC	0	0	2	1	0	0	0
753755	7	428517	7	429081	1	1	PNC1	757.296	1186.34	12433.2	18409.7	8.16613	8.16613	0.001	0.001	TCCTCTTTCCCTACGAT	TCCT-TTTCCCTAGGAT	0	0	0	2	1	0	0
753813	7	428460	7	429023	1	1	PNC1	564.467	876.579	8808.55	14481.8	41.7646	51.0961	1	0.0534458	TTTCATTACCCTGTGTG	AGACGTTACCCCGTATG	1	1	1	5	0	1	0
753853	7	428420	7	428983	1	1	PNC1	1572.88	3106.14	24092.3	57667.2	41.7646	51.0961	1	0.0534458	TTTCATTACCCTGTGTG	AGACGTTACCCCGTATG	1	1	1	5	0	1	0
756542	7	420764	7	422020	1	1	HEM2	1132.56	1029.2	17493.6	15619.7	46.3069	46.3069	0.93458	0.93458	CTCGTTTACCCGTATTT	CTCGTTTACCCGTAGTT	1	1	0	1	0	0	1
756843	7	417397	7	418657	1	0	RNA15	549.953	383.263	7499.94	5571.25	5.46863	9.48234	0.000518938	0.000518938	AGTGATCACTCGATGAT	AGTGATCACTCGATGAT	0	0	0	0	1	0	0
756904	7	417337	7	418596	1	1	RNA15	1069.07	839.141	16567.3	11910.2	46.3069	46.3069	0.93458	0.93458	AACTCTTACCCG-CCCC	ACCTCTTACCCGTCCCC	1	1	0	2	0	0	1
763473	7	398162	7	395985	1	1	SDS23	1203.56	1679.93	18207.2	24743.8	30.9576	30.9576	0.0465067	0.0465067	CTGGGATACCCGAAATA	CTGGGATACCCGAAATA	0	0	0	0	1	0	0
763547	7	398088	7	395912	0	1	SDS23	535.114	871.556	9012.45	13936.4	17.7399	17.7399	0.00756828	0.00756828	CCCGCTAACCCCGGGAC	CCCGCTAACCCCGGGAC	0	0	0	0	1	0	0
763701	7	397936	7	395761	1	1	SDS23	790.883	2595.36	14233.4	47079.1	38.2066	51.0961	0.132343	0.141607	GAGGGTGTCA-TATCTA	G--GGTAACCCTCTCCA	1	1	4	4	0	0	0
763754	7	397883	7	395708	0	1	SDS23	178.086	854.798	3106.17	14443.4	38.2066	38.2066	0.132343	0.132343	TGGTATAACCCGGACTG	TTTTATAACCCGGACTG	1	1	0	2	1	0	0
764398	7	393760	7	391619	1	1	RAD6	3797.78	4711.75	58822.7	86442.5	29.3794	12.1226	0.00890915	0.0629148	CTACATTTCCCGGATTA	CTACATTATCCGGAATG	0	1	2	2	0	0	0
764463	7	393824	7	391681	1	1	RAD6	5282.35	5489.91	85006.3	83910	41.5523	41.5523	0.120833	0.120833	C-CGGCTACCCGGAGGT	CTCGGCTACCCGGAGGT	1	1	0	1	1	0	0
766360	7	377302	7	375163	1	1	SGF73	1677.96	1242.37	27264.9	20345.8	51.0961	51.0961	0.93458	0.93458	CTCAGTTACCCGAAGAA	GTTGGTTACCCGAACAT	1	1	0	5	0	0	1
766420	7	377362	7	375219	1	0	SGF73	719.372	354.083	10886.9	6650.03	5.74984	6.90832	0.000202978	0.000149945	ATCTAACATCCTATATT	ATCCAAAATTCTATATT	0	0	2	1	0	0	0
767164	7	374929	7	372776	1	1	RPB9	684.666	727.592	12092.7	12221.8	46.3069	46.3069	0.93458	0.93458	TCAACTTACCCGCCCTA	TCAACTTACCCGCCCTA	1	1	0	0	0	0	1
772441	7	352392	7	350286	1	1	GUP1	750.768	673.201	12334.5	12479.5	34.2135	34.2135	1	1	TATTCTTACCCTTTCAG	TACTCTTACCCTTTCAG	1	1	0	1	0	0	1
775634	7	347042	7	344945	1	1	MMS2	868.329	1137.49	13318.2	20356	51.0961	51.0961	1	1	GCGTGTTACCCTAGGAA	TCGCGTTACCCTAGGAA	1	1	0	2	0	0	1
775981	7	343179	7	341099	1	0	NBP35	659.615	431.91	10993.5	7164.34	41.5523	41.5523	0.00093458	0.00115187	TTAATGAATCCGAAAAA	TTAATCAATCCGAAAAA	0	0	1	0	0	0	0
776528	7	334799	7	332722	0	1	PAN2	221.352	684.389	3487.47	11588.7	6.12867	7.75747	0.0524835	0.00261169	TCTAATTAGCCTTTGTT	TTTGAATAGCCTTTGTT	1	0	1	2	0	1	0
776591	7	334743	7	332663	1	1	PAN2	781.998	1329.17	12637.6	21249.3	24.6438	24.6438	0.00732148	0.00732148	-GGCGCCACCCGCCCCG	AGGCGCCACCCGCCCCG	0	0	0	1	1	0	0
777001	7	330894	7	328852	1	0	VPS45	1866.14	4.65986	28832.5	547.785	34.2135	11.0247	1	0.0497621	AGGTCTTACCCTTGTTT	AGGTTATACCCTTGTTC	1	1	1	2	0	1	0
777106	7	330806	7	328754	0	1	VPS45	251.347	830.867	4330.96	15405.8	6.12885	12.1226	8.74525e-05	0.00278591	ACTGTA----------T	GCTGGATACCGGATACT	0	0	6	6	0	0	0
777179	7	330740	7	328681	1	1	VPS45	3816.63	2372.71	57562.8	38969.2	51.0961	51.0961	1	1	TGACGTTACCCTTTCCT	TGACGTTACCCTTTCCT	1	1	0	0	0	0	1
780771	7	321604	7	319459	1	0	SRM1	943.43	414.353	14622.5	6563.25	46.3069	46.3069	0.93458	0.93458	ATTCATTACCCGCACA-	AACCATTACCCGCACAG	1	1	0	3	0	0	1
781119	7	316649	7	315592	1	1	USE1	1061.77	1021.64	14848.8	16687.3	51.0961	51.0961	0.93458	0.93458	GTTCGTTACCCGGACAA	CACCGTTACCCGGACAA	1	1	0	3	0	0	1
785730	7	299866	7	298850	0	1	TAF6	134.988	604.583	2988.23	10890.2	41.5523	41.5523	0.0465067	0.00093458	AAAAAATACCCGGAAAC	AAAAAGTACCCGGATAC	0	0	1	1	0	0	0
790685	7	280722	7	278968	0	1	NAB2	41.2062	1309.77	599.627	18589.1	5.23734	10.9936	9.35439e-05	0.00093458	TTGTA-TTCTCGTACAT	TTGTATTTCCCGTATAT	0	0	2	1	0	0	0
790756	7	280653	7	278901	0	1	NAB2	34.6808	1779.92	441.009	31493.4	9.45862	51.0961	0.0128003	0.0534458	ACTATTT-CCCCGCTTC	--TAGTTACCCCCCTTC	0	1	1	4	0	0	0
795978	7	249739	7	248060	1	1	SEC27	915.189	982.332	14305	15519.6	46.3069	46.3069	0.93458	0.93458	GTTTATTACCCGCTCAT	GTTTATTACCCGCTCAT	1	1	0	0	0	0	1
796266	7	245304	7	243650	1	1	YGL140C	3055.94	1233.58	50101.3	21037.1	41.7646	41.7646	1	1	AACCATTACCCTCCTCA	AACCATTACCCTGC-CA	1	1	0	2	0	0	1
796301	7	245269	7	243617	1	0	YGL140C	1177.52	171.947	17575.1	2916.6	41.7646	41.7646	1	1	AACCATTACCCTCCTCA	AACCATTACCCTGC-CA	1	1	0	2	0	0	1
800037	7	217368	7	215771	0	1	NUT1	522.005	1405.2	8724.61	21935.4	51.0961	46.3069	0.93458	1	-ACATTCAATCTGATTG	AACGCTTACCCTAACTA	1	1	3	6	0	0	1
801104	7	210167	7	208556	0	1	AMS1	468.387	690.225	8226.33	9973.54	6.65417	6.36153	0.000562953	0.00105889	T--ATCTATTC--AAAT	TGCATCTATCCAGAAA-	0	0	2	4	0	0	0
801198	7	210259	7	208645	1	1	AMS1	1942.53	2395.85	35934.6	45195.9	41.7646	41.7646	1	1	AGGGATTACCCTCGCGC	GGGGATTACCCTCGCGT	1	1	0	2	0	0	1
804289	7	200375	7	199479	1	1	YIP5	1110.9	662.639	16794.8	11485.7	12.8262	10.4533	0.000362657	0.000362657	CCGTAATACCGATATAC	CCGTAATACCGATATAC	0	0	0	0	0	0	0
804321	7	200343	7	199448	1	1	YIP5	3455.54	4951.51	57742.5	71886.6	46.3069	46.3069	0.93458	0.93458	GCTATTTACCCGGCTGT	ACTATTTACCCGGCTGT	1	1	0	1	0	0	1
804393	7	200271	7	199376	1	1	YIP5	949.876	2159.04	17503	34827.4	9.18802	5.5052	0.00987374	0.00566799	GGTCGCTGCCCTTGG-C	GGTCGCTGTCCTTGGAC	0	0	1	1	0	0	0
806698	7	191073	7	190259	1	1	PMR1	989.909	3177.32	15346.7	41887.7	7.95319	36.8576	0.000898031	0.132343	TTTATCAAGCCGCCGTC	TTTGTTAACCCGCCATC	0	1	2	2	0	0	0
806741	7	191030	7	190216	1	1	PMR1	2070.94	4380.21	44269.9	76005.8	34.2135	34.2135	1	1	GGCTCTTACCCTGCGTG	GGCTCTTACCCTGTATG	1	1	0	2	0	0	1
811281	7	165327	7	164458	1	1	TOS3	1531.77	864.6	22301.1	12903.4	41.5523	41.5523	0.0465067	0.0465067	TGAGCATACCCGGTCCC	TGAGCATACCCGGTCCC	0	0	0	0	1	0	0
811358	7	165250	7	164382	1	1	TOS3	1461.76	909.84	18946.2	11412.5	23.0326	23.0326	0.0629148	0.0629148	CTTACTTATCCGCGCGG	CTTACTTATCCGCGCGG	1	1	0	0	1	0	0
813328	7	157734	7	156873	0	1	GTS1	425.775	1911.54	7168.33	28712.9	46.3069	38.2066	0.93458	0.132343	ATCGATTACCCGGATCC	ATGGATAACCCGGAGGC	1	1	1	3	0	1	0
813356	7	157762	7	156901	1	1	GTS1	2095.25	1988.93	38678.4	34711	38.2066	38.2066	0.000490606	0.00818995	ATCGATTACCCGGATCC	ATGGATAACCCGGAGGC	0	0	1	3	0	0	0
817327	7	144227	7	143421	1	0	COX13	780.252	385.389	14372.5	7241.35	46.3069	41.5523	0.93458	0.120833	ATTTATTACCCGGATGT	AGTTGCTACCCGGA--T	1	1	1	4	0	1	0
817710	7	144561	7	143772	1	0	COX13	748.673	187.914	10472.9	3327.84	46.3069	46.3069	0.93458	0.93458	AAAAATTACCCGAAATT	AAAAATTACCCGAAGAT	1	1	0	2	0	0	1
817752	7	144603	7	143814	1	1	COX13	1101.97	1008.11	17912.2	17095.1	46.3069	46.3069	0.93458	0.93458	AAAAATTACCCGAAATT	AAAAATTACCCGAAGAT	1	1	0	2	0	0	1
817777	7	144628	7	143839	1	1	COX13	717.807	721.838	12943.9	13367.4	14.3496	12.665	0.00756828	0.000945428	AAAAATAACCCCCAGCT	AAAAATGACCCCCAGCT	0	0	1	0	0	0	0
820431	7	123469	7	122684	1	1	EMP24	2446.53	3266.04	44985.6	54368	46.3069	41.5523	0.93458	0.0465067	TTGGATTACCCGGAGTG	TTGGAT-ACCCGGCGTA	1	0	1	2	0	1	0
820485	7	123415	7	122631	1	1	EMP24	1280.77	2483.86	16090.5	30938.7	11.1852	11.1852	0.000158247	0.0123798	AATGTTTAAGCGACCCG	AATGCTAAACCGACCCG	0	0	2	1	0	0	0
822692	7	115791	7	117503	1	1	KEX1	773.779	1358.21	14815.3	20639.7	38.2066	41.5523	0.132343	0.00093458	TAAGGTAACCCGGATGT	TAAGGT-ACCCGGATGT	1	0	1	0	0	0	0
827336	7	92420	7	91840	1	0	NCS6	640.806	329.68	11800.4	6182.73	38.2066	38.2066	0.132343	0.132343	ATTTGTAACCCGGA-TA	AGCCGTAACCCGGAGTG	1	1	0	5	1	0	0
827893	7	87402	7	86727	0	1	CLG1	371.058	570.815	7245.49	10514.5	38.2066	38.2066	0.132343	0.132343	TCCCGTAACCCGGAATT	CTCCGTAACCCGGAGTT	1	1	0	3	1	0	0
830231	7	79110	7	78455	1	1	SDT1	1158.63	898.75	18421.8	15959	42.4042	42.4042	0.00111488	0.00093458	TCAAATTACTCAATTAA	TCAAATTACGCAATTAA	0	0	1	0	0	0	0
830301	7	79046	7	78385	1	0	SDT1	608.76	83.6316	10522.5	1769.73	4.86736	5.55209	6.73188e-05	0.000366824	TATCAACGCCCATACCA	----AACACCCATATCA	0	0	1	5	0	0	0
831896	7	76543	7	75928	0	1	VRG4	83.0448	11857.3	1514.13	211355	7.42339	41.7646	0.0490501	1	TTAAATTTCCCTTTTTA	TTAAATTACCCTTCTCT	1	1	1	3	0	1	0
831978	7	76624	7	76008	1	0	VRG4	611.898	279.408	11219.4	5448.2	9.13416	6.12885	0.00093458	7.13724e-05	ATTCATTACGCGTTTAG	ATTCATTGCACGTTTTG	0	0	2	1	0	0	0
832019	7	76665	7	76049	1	1	VRG4	2091.14	15891.9	32655.4	293227	24.4544	24.4544	0.121659	0.121659	TCCTCTTACCCAGCCTT	TTCTCTTACCCAGCCTA	1	1	0	2	1	0	0
832134	7	76776	7	76158	1	0	VRG4	611.934	492.503	10202.4	7886.7	6.39206	6.39206	0.000960892	0.000960892	GCTGCCAAGCCTATTTC	GCTGCCAAGCCTA-TTC	0	0	0	1	0	0	0
836237	7	53726	7	54930	1	1	HAP2	1282.25	2888.13	19546.5	43836.5	46.3069	46.3069	0.93458	0.93458	CAATCTTACCCGGAAAA	GACTCTTACCCGGAAAA	1	1	0	2	0	0	1
836274	7	53689	7	54893	0	1	HAP2	342.588	1982.47	6981.03	30669.5	46.3069	46.3069	0.93458	0.93458	CAATCTTACCCGGAAAA	GACTCTTACCCGGAAAA	1	1	0	2	0	0	1
836472	7	49385	7	50634	1	1	CSE1	624.505	635.86	9961.24	10427.1	41.7646	41.7646	1	1	TGCTATTACCCTGCCTT	CGCTATTACCCTGCCTT	1	1	0	1	0	0	1
837626	7	41313	7	42559	1	1	RTF1	815.395	1124	14730.1	16290.8	6.4316	5.56415	5.99034e-05	9.35439e-05	AA-CTTTGAC-TGT---	AACCTTTAACATGTGCG	0	0	2	4	0	0	0
837657	7	41327	7	42590	1	1	RTF1	626.971	1818.51	8988.5	27203.2	46.3069	46.3069	0.93458	0.93458	ATCCATTACCCGG-TTT	ATCCATTACCCGGAGTT	1	1	0	2	0	0	1
838234	7	36800	7	38041	1	1	BRR6	2174.06	2725.89	38075.8	45305.1	46.3069	46.3069	0.93458	0.93458	ATTCATTACCCGGGAGC	AACCATTACCCGGAAGT	1	1	0	4	0	0	1
838292	7	36858	7	38099	1	1	BRR6	729.304	2171.3	11403.5	32344.9	5.22507	35.0841	0.000157875	0.00093458	AGTTACTACTAGTATTT	AGTTGTTACCAGTACTT	0	0	2	2	0	0	0
839639	7	35210	7	36431	1	0	PDE1	655.348	531.84	10050.3	9356.98	51.0961	51.0961	0.93458	0.93458	GATCGTTACCCGGTAAA	GATCGTTACCCGGTTAA	1	1	0	1	0	0	1
842815	7	27893	7	29108	0	1	RTG2	2.28924	3941.38	36.6278	57373.7	41.7646	41.7646	0.0534458	1	-TTCATTACCCCAATCC	TTTCATTACCCTGATTC	1	1	1	3	0	1	0
842858	7	27853	7	29065	0	1	RTG2	2.28924	2683.55	36.6278	36814.8	41.7646	41.7646	0.0534458	1	-TTCATTACCCCAATCC	TTTCATTACCCTGATTC	1	1	1	3	0	1	0
843078	7	27637	7	28852	1	1	RTG2	2797.28	1209.64	53971	20932.9	42.3227	42.3227	0.0673188	0.0559846	AAAGTTA-TCCTATCTC	AAAGTTACTCC-ATCTC	1	1	2	0	0	0	0
843107	7	27609	7	28824	1	0	RTG2	1280.99	131.552	21716.5	2222.97	8.81745	8.51252	0.0673188	0.0559846	AAAGTTA-TCCTATCTC	AAAGTTACTCC-ATCTC	1	1	2	0	0	0	0
848660	7	499998	7	501089	1	1	SWC4	1061.25	2467.45	17367.6	41937.2	41.5523	51.0961	0.120833	0.93458	AATAGCTACCCGGAGTT	GAT-GTTACCCGGAATT	1	1	1	3	0	1	0
848703	7	499961	7	501048	0	1	SWC4	430.277	1596.55	7909.86	23495.1	7.48552	7.1746	0.00376881	0.000699839	TCGTATTATCGGAGAAA	TGGTATCATCGAAAGAA	0	0	2	3	0	0	0
850858	7	511346	7	512436	0	1	SEC9	223.992	1000.23	3949.25	15694.1	5.68525	8.91939	0.000426187	0.000147895	-TACCATACTCGCTGTC	GTACCACATTCGCAGTC	0	0	2	2	0	0	0
850982	7	511223	7	512312	1	0	SEC9	619.194	141.425	10066.3	2674.94	12.4013	12.665	0.000426187	0.0599034	GTATTTTACATTCCATA	GTACTTTACCGTCCATA	0	1	2	1	0	0	0
851016	7	511189	7	512280	1	1	SEC9	1623.28	829.955	27456.6	18829.4	46.3069	46.3069	0.93458	0.93458	TTCTATTACCCGTCTTT	TTCTATTACCCGTCTTT	1	1	0	0	0	0	1
851445	7	512990	7	514072	1	1	MCY1	928.266	1037.04	15088.3	15838.1	12.665	10.0769	0.00110731	0.000699839	TTGATCTACTCGCGTTA	TTGCTCTGCACACATTA	0	0	3	2	0	0	0
851507	7	513052	7	514134	1	1	MCY1	1916.97	2723.27	27533	42231.3	46.3069	46.3069	0.93458	0.93458	GATCATTACCCGCATTA	GATCATTACCCGCATTG	1	1	0	1	0	0	1
851546	7	513091	7	514173	0	1	MCY1	468.766	1034.69	6708.99	14710	9.89617	9.89617	0.000227648	6.73188e-05	TAACAATGCCGTATAAT	TAACAATGTGGCATAAT	0	0	3	0	0	0	0
854635	7	532753	7	534328	1	1	THG1	869.94	933.126	15929.8	16871.4	46.3069	46.3069	0.93458	0.93458	CAGTTTTACCCGGATTG	--GTTTTACCCGGATTG	1	1	0	2	0	0	1
857412	7	547459	7	543623	0	1	GSC2	114.019	1175.27	2639.76	17777.5	18.0587	18.0587	0.00953278	0.00922781	GCCTTTAATCCTCGTGC	GCCTTTAGTCCTCGTGC	0	0	1	0	0	0	0
860739	7	560449	7	556607	1	0	ACB1	839.169	125.553	14252.7	4230.74	51.0961	51.0961	0.93458	0.93458	AGCCGTTACCCGACAAC	A--CGTTACCCGACCAC	1	1	0	3	0	0	1
860789	7	560402	7	556559	1	1	ACB1	2701.72	1774.18	42640.3	27998.5	51.0961	51.0961	0.93458	0.93458	AGCCGTTACCCGACAAC	A--CGTTACCCGACCAC	1	1	0	3	0	0	1
860941	7	560256	7	556410	1	1	ACB1	1103.97	563.317	16604.8	7849.69	8.40394	8.44811	0.000332234	0.00171264	TGCCACAAACTCTCGTA	TTCTACAAAC-CTCGTA	0	0	1	2	0	0	0
864511	7	584702	7	569906	1	0	RME1	565.082	227.582	7864.28	4159.44	46.3069	51.0961	0.93458	0.93458	TTCTCTTACCCGACATG	TCTTGTTACCCGG----	1	1	0	8	0	0	1
864547	7	584669	7	569875	1	1	RME1	826.04	738.009	13554.8	11593.1	46.3069	51.0961	0.93458	0.93458	TTCTCTTACCCGACATG	TCTTGTTACCCGG----	1	1	0	8	0	0	1
867634	7	592692	7	577913	1	1	FMP48	1776.67	1702.81	30281.6	29828.9	26.6005	26.6005	0.0566279	0.0566279	TTTCGTCACCCGCTCGA	TTTCGTCACCCGCTTCA	1	1	0	2	1	0	0
870504	7	601462	7	586711	1	1	RSC1	782.317	865.879	10807.7	12811.3	34.2135	34.2135	1	1	CTCCCTTACCCTCTTTC	TTCCCTTACCCTCTTTC	1	1	0	1	0	0	1
872236	7	609792	7	595039	0	1	ERG25	282.629	2280.62	4653.69	43054.6	5.24128	13.3898	0.000242857	0.0123798	AGGCC------GAAAAG	AGCCCTAAACCGAAAAG	0	0	6	1	0	0	0
872345	7	609894	7	595132	1	1	ERG25	1180.24	2547.84	19540.2	44302.6	51.0961	51.0961	0.93458	0.93458	ATTCGTTACCCGGTGTA	A-AGGTTACCCGGTACA	1	1	0	5	0	0	1
878309	7	641946	7	627245	1	1	PAC10	667.545	767.836	10389.2	11606.7	5.63721	8.18161	0.000625453	0.00870372	CTGCACTCTCTTTGTCC	CCGCGCTATCCTTTTCT	0	0	2	4	0	0	0
878363	7	641903	7	627192	1	1	PAC10	1665.24	1728.81	28463.9	29495.9	51.0961	51.0961	1	1	ACAAGTTACCCTAACAC	A-AAGTTACCCTAACAC	1	1	0	1	0	0	1
878414	7	641855	7	627142	0	1	PAC10	479.064	916.921	7484.27	13922.2	9.0794	12.8262	0.000141607	0.000141607	TACCCTAACACTGTATA	TACCCTAACACTGAATA	0	0	0	1	1	0	0
879779	7	640514	7	625812	0	1	PAC10	361.245	1108.61	6376.07	17840.5	51.0961	51.0961	0.93458	0.93458	ATGTGTTACCCGTCCT-	AAA-GTTACCCGACCTT	1	1	0	5	0	0	1
881710	7	643922	7	629226	0	1	SLX9	139.518	1091.02	2420.46	17765.3	7.27342	7.8632	0.00128121	0.000671806	AATATTTCACCTTGATA	AATATTTCACACTGATA	0	0	2	0	0	0	0
881763	7	643871	7	629174	0	1	SLX9	76.2293	1079.82	1432.44	15347.2	21.3438	26.6005	0.00323838	0.0566279	TGCGTCACCCCGTTCAG	TGCGTCACCC-GTTCAG	0	1	1	0	0	0	0
882040	7	647032	7	632317	0	1	GCD2	401.911	715.514	7470.43	11684.5	46.3069	46.3069	0.93458	0.93458	TATATTTACCCGGGAAT	CATATTTACCCGGGAAT	1	1	0	1	0	0	1
897401	7	718713	7	699148	1	1	DAM1	1013.78	1339.08	17273.2	18552.8	31.5163	31.5163	0.0713724	0.0713724	GCGCGTTGCCCGGACAA	GCGCGTTGCCCGGACAA	1	1	0	0	1	0	0
897918	7	720204	7	700633	1	1	SPT6	746.069	627.964	11000.9	9951.56	46.3069	46.3069	0.93458	0.93458	AAATATTACCCGAATTT	AAGTATTACCCGAAGTT	1	1	0	2	0	0	1
897955	7	720241	7	700670	1	1	SPT6	1846.47	1172.13	31654.7	18755.9	46.3069	46.3069	0.93458	0.93458	AAATATTACCCGAATTT	AAGTATTACCCGAAGTT	1	1	0	2	0	0	1
904508	7	754121	7	734408	1	0	YGR130C	820.545	467.473	12168.7	6747.17	9.34415	5.5402	0.00297203	0.00297203	CCTGTTCAGCCGTTTAA	CTTGCTCAGCCGTTTAA	0	0	0	2	1	0	0
904584	7	754047	7	734332	1	1	YGR130C	2621.21	2306.41	41537.2	38233.9	41.5523	41.5523	0.120833	0.120833	ACTCGCTACCCGGCCGC	GCTTGCTACCCGGCCAC	1	1	0	3	1	0	0
904642	7	753991	7	734275	0	1	YGR130C	362.653	983.544	6831.54	13851.8	13.5473	13.5473	0.00818995	0.00818995	CATTCTTATCCATCGTT	CATCCTTATCCATCGTT	0	0	0	1	1	0	0
904902	7	757506	7	737789	1	1	PHB1	996.456	1266.92	16898.3	22879.5	46.3069	46.3069	0.93458	0.93458	CTACCTTACCCGGGCAG	ATATCTTACCCGGACGG	1	1	0	4	0	0	1
905555	7	756854	7	737137	1	1	PHB1	10065	4505.81	143547	68588.7	37.9012	37.9012	0.132343	0.132343	CAGCATAACCCGGCCAG	CAGCATAACCCGGCCAG	1	1	0	0	1	0	0
905609	7	756800	7	737083	1	1	PHB1	7091.86	1301.03	131590	34667.4	13.2937	13.2937	0.000484308	0.000484308	GCAGACTGGCCGGGTTA	GCAGACTGGCCGGGTTA	0	0	0	0	0	0	0
905761	7	756650	7	736939	1	1	PHB1	1742.65	565.654	25606.2	9186.46	51.0961	51.0961	0.93458	0.93458	TCGCGTTACCCGTATCA	TCGCGTTACCCGTATCA	1	1	0	0	0	0	1
905799	7	756613	7	736902	1	1	PHB1	2850.63	1809.06	45037.5	28511.3	51.0961	51.0961	0.93458	0.93458	TCGCGTTACCCGTATCA	TCGCGTTACCCGTATCA	1	1	0	0	0	0	1
907328	7	761207	7	741500	1	1	PRE9	844.181	1247.59	13586.4	19893.1	51.0961	51.0961	1	1	ATTCGTTACCCTGCAGG	ATCCGTTACCCTGCAGG	1	1	0	1	0	0	1
910869	7	770381	7	750729	0	1	VPS62	63.8321	2284.07	7120.79	38672.8	8.06649	6.69596	0.00109674	0.00120123	TTCCGGCAGCCT-----	----GGCAGCCTAGAAT	0	0	0	9	0	0	0
910946	7	770440	7	750799	1	1	VPS62	4414.28	4531.46	61397.8	60297.7	51.0961	46.3069	0.93458	0.93458	AGGTGTTACCCGATTTT	AGGTATTACCCGACTTG	1	1	0	3	0	0	1
910984	7	770478	7	750837	1	1	VPS62	1898.09	774.157	31130.2	13718.3	9.19339	5.4295	0.00101161	0.000432855	GTTGGTAGACCTGGTAA	GCTGGCAGACTTCATAG	0	0	2	4	0	0	0
911187	7	771995	7	752358	1	0	BTN2	1780.11	38.1454	34187.1	994.882	41.7646	7.06313	1	0.0673188	ATTAC----CCTGTAAA	ATTAGTTATCCTGTAAA	1	1	4	1	0	1	0
915364	7	781633	7	761612	0	1	ENP2	428.037	903.464	7222.49	14996	51.0961	51.0961	0.93458	0.93458	TTTGGTTACCCGACCAT	TTCAGTTACCCGACTTG	1	1	0	5	0	0	1
915909	7	787167	7	767150	0	1	NAT2	237.06	1007.88	3240.81	17490.2	12.665	12.1286	0.000339532	0.00314394	-CTTTATGACGTTTTCA	GCTTTTAG-CGTGTTCA	0	0	3	2	0	0	0
915962	7	787115	7	767098	1	1	NAT2	1761.32	3523.73	31883.1	58827.8	51.0961	51.0961	0.93458	0.93458	ATC-GTTACCCGGCTTC	AACAGTTACCCG-----	1	1	0	7	0	0	1
920525	7	800256	7	780446	1	1	PTI1	1250.75	1209.37	19159.3	19604.7	46.3069	46.3069	0.93458	0.93458	TGCTCTTACCCGACTCT	TGCTCTTACCCGACCCT	1	1	0	1	0	0	1
922358	7	808008	7	788133	0	1	NSR1	371.532	1457.8	6218.33	22754.3	41.7646	41.7646	1	1	GTTAATTACCCTTTGAT	CTT-ATTACCCTT----	1	1	0	6	0	0	1
922440	7	807928	7	788060	1	1	NSR1	577.893	1452.69	8235.85	20433.3	24.4544	24.4544	0.0534458	0.0534458	GGCACTTACCCCCAGGA	GGCGCTTACCCCCCGGA	1	1	0	2	1	0	0
929358	7	843690	7	813878	1	1	YIP1	901.756	2228.04	15478.6	35240.3	51.0961	46.3069	0.93458	0.93458	AATGGTTACCCGAAGTG	CATGATTACCCGCAGCG	1	1	0	4	0	0	1
929389	7	843659	7	813847	1	1	YIP1	671.71	1642.78	10921	28708.6	18.0334	29.6543	6.75528e-05	0.000647811	TT-TGTAGCTGTTATAA	TTCTGTAGCCGTTATAA	0	0	1	1	0	0	0
930731	7	853609	7	824029	1	1	PBP1	4544.34	2629.33	57140.9	36871.8	38.2066	38.2066	0.132343	0.132343	TTACGTAACCCGGATGC	TTACGTAACCCGGATGC	1	1	0	0	1	0	0
930768	7	853572	7	823992	1	1	PBP1	2806.79	4830.05	47506.7	81261.5	38.2066	38.2066	0.132343	0.132343	TTACGTAACCCGGATGC	TTACGTAACCCGGATGC	1	1	0	0	0	0	0
930795	7	853545	7	823965	1	1	PBP1	4019.48	2618.33	71169	45545.5	6.30591	6.7007	0.00065917	7.33817e-05	CTCAGAAAACCTTGGAG	CTCAGAAGACCTTGGAG	0	0	1	0	0	0	0
931175	7	855106	7	825526	1	1	OKP1	826.469	596.242	12022.9	7939.51	5.79191	11.197	0.001	0.000121659	-----TTTCCCTTATCT	AAGTTTTTCTCTTACCT	0	0	1	6	0	0	0
931249	7	855041	7	825466	1	1	OKP1	686.739	3083.5	19336.5	42838.8	51.0961	46.3069	0.93458	0.93458	-----TTACCCGGAGAG	GTATATTACCCGGAGCG	1	1	0	6	0	0	1
931311	7	854996	7	825410	0	1	OKP1	477.667	1270.5	9640.02	20960.1	8.07251	6.90832	0.000953075	0.00890915	GGTGGA--CCGTATTGT	-----AATCCGTATTGT	0	0	2	5	0	0	0
933819	7	866238	7	837091	1	1	UBR1	580.713	2484.47	11108.7	46911.6	46.3069	46.3069	0.93458	0.93458	TACACTTACCCGGTTAT	TACGCTTACCCGGTG-T	1	1	0	3	0	0	1
933852	7	866207	7	837059	0	1	UBR1	150.885	1196.37	4023.96	22507.1	7.42897	9.81251	0.0123798	0.00048762	AAATAAAC--CGTCGCA	AAA-AAACGCCGTCGCA	0	0	2	1	0	0	0
936847	7	879704	7	849709	0	1	CRH1	0	1434.31	0	23908.9	11.197	21.3438	0.0599034	0.0605918	--TTCTCA----ATTCT	AATTGTCACCCTATCCT	1	1	4	4	0	0	0
937189	7	879523	7	849384	0	1	CRH1	520.567	655.459	7459.77	11117.7	41.5523	36.8576	0.120833	0.132343	CTTGGTGTCCC-ATTTT	TTTGGTAACCCGTTTTT	1	1	3	2	0	0	0
937218	7	879496	7	849355	0	1	CRH1	92.5963	566.516	1868.49	10322.4	11.8934	36.8576	0.000141607	0.132343	CTTGGTGTCCC-ATTTT	TTTGGTAACCCGTTTTT	0	1	3	2	0	0	0
938680	7	884427	7	855953	1	1	TDH3	655.721	699.631	13450.1	11925.3	5.02392	9.13416	6.73188e-05	6.73188e-05	AGTGATTTTCCTAACTT	AATGATTTTCCTAACTT	0	0	0	1	1	0	0
938715	7	884392	7	855918	1	0	TDH3	6252.53	79.4761	97359.9	2128.71	36.8576	6.62367	0.132343	0.000492873	TGCTGTAACCCGTACAT	TGCTGCCATCCGTAAAT	1	0	3	1	0	0	0
938776	7	884335	7	855863	1	1	TDH3	7252.62	2368.95	125158	41434.1	36.8576	36.8576	0.132343	0.132343	CTGTGTAACCCGCCC--	TTGTGTAACCCGCTCAA	1	1	0	4	1	0	0
939828	7	888681	7	859968	1	1	XKS1	665.297	1101.66	10338.1	16774.5	51.0961	51.0961	0.93458	0.93458	CCGCGTTACCCGAAGAT	CCTCGTTACCCGAAGAG	1	1	0	2	0	0	1
939865	7	888644	7	859931	0	1	XKS1	199.173	731.86	3826.71	11490.9	51.0961	51.0961	0.93458	0.93458	CCGCGTTACCCGAAGAT	CCTCGTTACCCGAAGAG	1	1	0	2	0	0	1
940230	7	892331	7	863622	1	1	FYV8	1104.74	2554.45	18102.4	34954.2	41.5523	46.3069	0.120833	0.93458	AATAGCTACCCGG----	AAT---TACCCGGGGTT	1	1	1	6	0	1	0
940549	7	894527	7	865826	0	1	SNG1	25.458	1029.92	496.981	15282.6	6.74769	26.6005	0.0123798	0.0566279	ACCGAT-TCCCGTTTAG	ACCGGTCACCCGTACA-	0	1	2	4	0	0	0
940930	7	897229	7	868533	0	1	PMT6	0	950.685	52.6524	16078.2	5.18213	5.60463	6.73188e-05	8.08654e-05	AGTATCTTTACACCAGA	AGTATCTGTCCACCAGA	0	0	2	0	0	0	0
941040	7	897334	7	868583	1	1	PMT6	975.556	1773.98	16696.3	34130.4	51.0961	51.0961	0.93458	0.93458	TTAGGTTACCCGTTTTT	TTAAGTTACCCG-TATT	1	1	0	3	0	0	1
942011	7	905174	7	876398	1	0	PCT1	588.769	199.22	8630.12	3574.34	5.72803	11.6819	5.22121e-05	0.0629148	CACAGCTATCTATACTG	CACAGTTATCCGTACTG	0	1	3	0	0	0	0
942098	7	905091	7	876312	1	1	PCT1	2828.04	1334.26	52932.3	17998.8	46.3069	46.3069	0.93458	0.93458	-TGCATTACCCGTATT-	TTGTATTACCCGTATTA	1	1	0	3	0	0	1
942228	7	904968	7	876188	1	0	PCT1	735.611	198.181	12201.9	3839.23	8.21168	11.197	0.001	0.001	CGTTTTTACGCTTCGTT	CCTTTTTACGCTTCGTT	0	0	0	1	1	0	0
942634	7	905791	7	877014	1	0	ADE3	627.414	90.2123	9804.46	1449.16	36.8576	8.81518	0.132343	4.65067e-05	CTCCATAA-CCCGTAAC	CTCCATAATTCCGTAAC	1	0	2	0	0	0	0
944537	7	914981	7	886147	0	1	YGR210C	0	1802.61	0	28685.8	12.2375	41.7646	0.141607	1	AAG-----CCCTTA---	AAGGATTACCCTTATTT	1	1	3	5	0	1	0
944578	7	914966	7	886107	0	1	YGR210C	232.799	3192.44	5406	54037.4	7.50877	41.7646	0.00128121	1	AAG-----CCCTTA---	AAGGATTACCCTTATTT	0	1	3	5	0	1	0
948615	7	932104	7	902700	1	1	CRM1	2119.45	3218.88	32934	47403.9	46.3069	51.0961	0.93458	0.93458	CATCATTACCCGGAGAT	AATTGTTACCCGGCGGT	1	1	0	5	0	0	1
948670	7	932159	7	902754	1	1	CRM1	722.742	1955.31	12303.8	33170.4	4.79242	12.5571	0.001	0.001	GCAGATTTCCCTGGCTT	GCAGATTTCCCTGACTT	0	0	0	1	1	0	0
948972	7	937023	7	907624	1	0	MRPL9	648.296	257.113	8464.39	3690.23	9.13418	9.60735	0.000922021	5.99034e-05	GCCATTTCTC-CTATTA	--CATCTCTCTTTATTA	0	0	3	2	0	0	0
949027	7	936971	7	907572	1	1	MRPL9	1279	1281.83	19077.6	20156.5	46.3069	46.3069	0.93458	0.93458	--GGATTACCCGAAAAC	TTGGATTACCCGAAAT-	1	1	0	4	0	0	1
952496	7	953831	7	924577	1	1	PHB2	896.073	1868.8	13865.9	31825.1	46.3069	46.3069	0.93458	0.93458	CT--CTTACCCGGCTGT	CTTGCTTACCCGGCTGT	1	1	0	2	0	0	1
952639	7	953693	7	924438	1	1	PHB2	813.218	912.156	11417.2	14239.2	7.48552	5.671	0.000741595	7.50526e-05	TCGACTAAACGGATACG	CAGATTCAACATATACG	0	0	3	3	0	0	0
954903	7	962190	7	932970	1	1	MIC26	1263.95	2498.63	30937.1	36452.5	51.0961	51.0961	0.93458	0.93458	AACGGTTACCCGCGCTT	AATGGTTACCCGCGCTT	1	1	0	1	0	0	1
955470	7	965868	7	936675	1	1	YGR237C	649.552	611.41	8553.87	7837.84	46.3069	46.3069	0.93458	0.93458	GCTCTTTACCCGGCGAA	GTTCTTTACCCGGCGAA	1	1	0	1	0	0	1
955509	7	965829	7	936636	1	1	YGR237C	2011.38	1449.63	33557	25187.7	46.3069	46.3069	0.93458	0.93458	GCTCTTTACCCGGCGAA	GTTCTTTACCCGGCGAA	1	1	0	1	0	0	1
955543	7	965795	7	936602	1	0	YGR237C	852.735	346.607	13626	8031.5	7.65178	6.97352	0.000681729	0.000681729	GACCCTTAACGAAGCGA	GACCCTTAACGAAGCGA	0	0	0	0	0	0	0
957254	7	974733	7	945532	1	0	PFK1	1672.1	111.953	26630.4	1940.84	34.2135	6.09316	1	0.000129291	AATTTTTACCCTGATCT	CAGTCCTTCTGTGAT--	1	0	4	5	0	1	0
957342	7	974645	7	945448	1	0	PFK1	842.348	228.788	14183.3	3799.78	36.8576	13.3898	0.132343	0.00890915	GACTGTAACCCGTAGAT	AAATGTAATCCGTAGAT	1	0	1	2	0	1	0
958476	7	976966	7	947753	1	1	YAP1802	28807	40280.2	483248	659832	51.0961	46.3069	0.93458	0.93458	AAATGTTACCCGACTAT	AAATATTACCCGGATAT	1	1	0	3	0	0	1
958540	7	976902	7	947698	1	1	YAP1802	14950.5	43136.1	295141	697540	51.0961	51.0961	1	0.0534458	AAAGGTTACCCTGCAGT	----GTTACCCCGCAAT	1	1	1	5	0	1	0
960933	7	986939	7	957718	0	1	MGA1	78.5186	864.73	1117.23	11772.5	11.7913	7.42339	0.00566799	0.00566799	CAAACTCAACCTTAAAA	CAAACTCAACCTTAAAA	0	0	0	0	1	0	0
960971	7	986977	7	957756	0	1	MGA1	490.067	2639.12	7700.18	41474.5	31.8197	31.8197	0.0566279	0.0566279	ATAGCTCACCCGGTGAT	ACCACTCACCCGGTGAT	1	1	0	3	1	0	0
964291	7	1000443	7	971005	1	1	PUP2	1309.51	1069.01	16347.9	12403.8	36.8576	42.3227	0.132343	0.0171107	GTAGATAACCCGCCTAG	GTAGATGACCCGGCTAG	1	0	1	1	0	0	0
965535	7	999246	7	969867	1	0	PUP2	1009.44	6.97126	16923.9	216.171	19.2656	14.6407	0.141607	0.00161155	TATGATAACCCTGTATA	TAGAAGAACCCTGTATA	1	0	1	2	0	1	0
969474	7	1022537	7	993172	1	1	MES1	806.755	581.871	12473.9	10279.1	10.9936	10.9936	0.00376881	0.00376881	TATTTTTATCGGCACGG	TATTTTTATCGGCACGG	0	0	0	0	1	0	0
969504	7	1022507	7	993142	1	1	MES1	1301.89	1903.8	22922.1	31724.7	46.3069	46.3069	0.93458	0.93458	TGGTATTACCCGACGCT	TGACATTACC---CGGT	1	1	2	4	0	0	1
969605	7	1022414	7	993051	0	1	MES1	199.027	1398.5	3225.14	24844.3	6.41002	8.82011	0.0172277	0.0172277	-AACTTAACCCAGAAGG	GAACT-AACCCAGAAGG	0	0	1	1	0	0	0
970237	7	1026096	7	996742	1	0	FOL2	2254.1	458.576	35573	8873.47	15.1208	15.7877	0.00737155	0.000411155	AATTATCACCCAGCCTC	AATTATCTCCCAGCCTC	0	0	1	0	0	0	0
970280	7	1026053	7	996699	1	1	FOL2	3585.65	4516.48	47662	64935.1	42.3227	42.3227	0.00737155	0.00093458	AATTATCACCCAGCCTC	AATTATCTCCCAGCCTC	0	0	1	0	0	0	0
973477	7	1031611	7	1002285	1	1	SLH1	812.645	775.595	11942.1	10545.8	8.27394	5.60463	0.00012139	0.0132464	AAAACCACACCTTGTAT	AAGACTAAACCTTGTAT	0	0	2	1	0	0	0
973564	7	1031690	7	1002369	1	1	SLH1	1648.74	1720.63	26367.9	28332.4	46.3069	46.3069	0.93458	0.93458	GGTCATTACCCGAAAC-	AGTCATTACCCGAAGCC	1	1	0	3	0	0	1
976346	7	1051841	7	1022539	0	1	PXR1	437.343	628.216	8113.07	10110.2	51.0961	46.3069	0.93458	0.93458	GACTGTTACCCGGTTGT	GGCTCTTACCCGGTTGT	1	1	0	2	0	0	1
977685	7	1061807	7	1032548	1	1	ERV29	1541.35	1929.1	25673.8	30731.9	6.08321	6.49493	3.06987e-05	7.97608e-05	ATATTCTATTCCATTTC	ATATTCTATTCTATTTC	0	0	1	0	0	0	0
977748	7	1061746	7	1032486	1	1	ERV29	2711.89	3289.53	46227.9	52783.6	51.0961	51.0961	0.93458	0.93458	AACCGTTACCCGAACCT	AACTGTTACCCGAGCCC	1	1	0	3	0	0	1
978345	7	1063485	7	1034220	1	0	ZUO1	622.178	188.888	10275.1	4528.35	5.12535	6.08321	0.00566799	0.000699839	ATATGTCAACCTTTT--	-----TCA---TGTTGC	0	0	3	8	0	0	0
978523	7	1063326	7	1034062	1	1	ZUO1	1693.18	1818.29	28585.4	29481.9	46.3069	46.3069	0.93458	0.93458	AAATATTACCCGCAAAT	AATTATTACCCGCCATT	1	1	0	3	0	0	1
978617	7	1063232	7	1033972	0	1	ZUO1	291.305	705.299	8860.55	11786.9	6.0714	10.8895	0.000942247	1.32464e-05	TTTTCCTA-CCGATGCT	ATTTTCTAGCTCAGGCT	0	0	3	3	0	0	0
980722	7	1070120	7	1053165	1	0	IMA1	1490.24	0	25233.7	266.645	38.2066	13.0941	0.0566279	0.00362966	CCAGGTCACCCGGACTT	C---GTCAC----ACTT	1	0	3	4	0	0	0
980755	7	1070087	7	1053148	1	0	IMA1	1033.45	0	17309.5	9.29502	38.2066	46.3069	0.0566279	0.93458	GGACTTTATATGCC-AA	--ACTTTACCCGCCGAA	1	1	3	3	0	1	0
980977	7	1069961	7	1052939	0	1	IMA1	2.28924	602.527	128.197	11457.5	6.90827	26.346	0.000654056	0.0534458	CATAAACATACAGCCCC	CCTTACC---CCGCCCC	0	1	5	2	0	0	0
984241	8	98925	8	86843	1	1	MRP4	1428.3	3083.61	24321.6	50919.8	26.6005	26.6005	0.0566279	0.0566279	AATACTCACCCGCTTGC	AATACTCACCCGCTTGC	1	1	0	0	1	0	0
984360	8	99038	8	86956	1	1	MRP4	2154.85	4586.25	35479.2	73551.6	42.3227	42.3227	0.0072878	0.00093458	TTCACTTACCGAATTGA	TTCACTTACTGGATTGA	0	0	2	0	0	0	0
991136	8	75249	8	69335	1	0	RPS20	964.614	9.29502	14684.4	274.203	51.0961	46.3069	0.93458	0.93458	TATCGTTACCCGAACTT	GATTTTTACCCGAAATT	1	1	0	4	0	0	1
993003	8	67625	8	61695	1	1	OPI1	648.605	965.732	11193.4	15454.2	46.3069	46.3069	0.93458	0.93458	CGATTTTACCCGGTTGC	CGATTTTACCCGGTTGC	1	1	0	0	0	0	1
995409	8	56005	8	50083	1	0	RIM4	567.486	113.002	8679.55	1881.68	8.27394	5.56395	5.77116e-05	5.77116e-05	TGCACAAATCCACTATG	TGCAAAAATCCAGAATG	0	0	0	3	0	0	0
995474	8	56065	8	50138	1	1	RIM4	992.918	646.441	17332.7	11199.9	51.0961	51.0961	0.0534458	0.0534458	TGTTGTTACCCCCTTGC	TTTTGTTACCCCCTTGT	1	1	0	2	1	0	0
996726	8	50585	8	44628	0	1	RIM101	2.28924	665.091	48.0739	9713.64	19.1351	46.3069	0.0490501	0.93458	GTTCATTAGCCGCAGAA	GTTCATTACCCGCAGAA	1	1	1	0	0	1	0
998162	8	39982	8	34030	1	1	GOS1	619.369	2106.95	11765.2	33365.5	9.54676	7.87807	0.00093458	0.000129291	AGAGCTTACCAGCTTCT	AGTGCTGACTAACTTCT	0	0	3	1	0	0	0
998231	8	39913	8	33965	1	1	GOS1	1381.82	2444.07	22779	42201	51.0961	51.0961	0.93458	0.93458	ATGTGTTACCCGGTATA	AT-TGTTACCCGGCATG	1	1	0	3	0	0	1
1013780	8	150956	8	138474	1	0	YHR022C	781.352	55.7701	13354.5	1134.41	12.665	12.665	6.37557e-05	0.00465494	AACGCATCACCTCCTTC	AACGCATAACCTCCCTA	0	0	1	2	0	0	0
1013881	8	150857	8	138381	1	0	YHR022C	1036.44	35.7685	18812.6	791.554	46.3069	12.1286	0.93458	0.0136963	AGATCTTACCCGAATAC	------TACGCGAATCT	1	0	2	7	0	1	0
1014064	8	151352	8	138875	1	1	MYO1	3133.25	639.032	47425.1	12282.8	38.2066	7.4592	0.132343	6.73188e-05	GCTTTAAC-CCGGAAGA	ACTTCAAATCCAGAAGA	1	0	3	2	0	0	0
1014141	8	151422	8	138943	1	1	MYO1	7426.21	2889.01	138274	53035.4	41.7646	41.7646	1	1	CAGCATTACCCTG----	AAGTATTACCCTGCATT	1	1	0	6	0	0	1
1014227	8	151504	8	139028	1	1	MYO1	2676.62	1558.07	41059.2	23200.8	41.7646	41.7646	1	1	CGCAATTACCCTTTTGG	CGCAATTACCCTTTTGG	1	1	0	0	0	0	1
1014867	8	160593	8	148121	1	1	VMA16	1162.3	787.244	19616.2	13277.4	51.0961	51.0961	0.93458	0.93458	TTCCGTTACCCGTCTTT	TGCAGTTACCCGTATTT	1	1	0	3	0	0	1
1014903	8	160629	8	148157	1	0	VMA16	555.068	344.965	9501.84	5793.78	51.0961	51.0961	0.93458	0.93458	TTCCGTTACCCGTCTTT	TGCAGTTACCCGTATTT	1	1	0	3	0	0	1
1016826	8	173113	8	160601	1	1	RRM3	1238.28	937.038	20118.4	14560.5	36.8576	26.6005	0.132343	0.0566279	GGGGCTAACCCGAATGC	AGGGCTCACCCGAATGC	1	1	1	1	0	0	0
1023724	8	207344	8	194282	0	1	SMF2	316.642	969.253	6080.25	18432.1	16.6752	16.6752	0.00756828	0.00756828	GCTGCTAACCCCGCCCG	GAAGCTAACCCCGCCCG	0	0	0	2	1	0	0
1026505	8	222811	8	207771	1	0	GIC1	552.768	6.97126	7413.55	76.6839	41.5523	10.9936	0.120833	6.73188e-05	TA---CTACCCGGGTAC	-AGCGCTAT---GGTGT	1	0	4	6	0	0	0
1033940	8	249816	8	235100	1	0	PPE1	803.8	188.283	12020.8	2932.82	8.44811	6.34065	0.0136963	0.00856449	CTATGTTCCCCTAT--G	CTATGTT---CTGTTCG	0	0	3	3	0	0	0
1033992	8	249767	8	235052	1	1	PPE1	1341.87	583.214	20384	9190.07	46.3069	46.3069	0.93458	0.93458	ATATATTACCCGAATTA	-TATATTACCCGAATGA	1	1	0	2	0	0	1
1035560	8	262091	8	247259	0	1	IRE1	273.019	643.19	5323.96	11973.6	9.13416	6.56816	6.73188e-05	0.00694581	AGTAATGAACTTAAATG	AGTAGTAAGCCGAAGCG	0	0	4	3	0	0	0
1035637	8	262016	8	247183	1	1	IRE1	2046.03	926.633	30243.9	13684.7	41.7646	41.7646	1	1	TTTTATTACCCTCTGTT	TTTTATTACCCTCTGTT	1	1	0	0	0	0	1
1035744	8	261914	8	247076	1	0	IRE1	3213.49	479.374	61739.3	9128.98	12.9729	12.9729	0.0713724	0.0713724	AGGTATTGCCCGAAGAG	AGGAATTGCCCGAAGGT	1	1	0	3	1	0	0
1036549	8	272547	8	257765	1	1	KSP1	4004.2	1424.34	61778.5	21089.2	51.0961	51.0961	1	1	TCCCGTTACCCTCATCG	CTACGTTACCCTCACCG	1	1	0	4	0	0	1
1036640	8	272456	8	257676	1	1	KSP1	1890.58	855.631	28466.8	13505.9	13.7478	19.966	0.000274766	0.00115187	TTTAACAATTTGTCCCT	TTTAGCAATCCGTCCCT	0	0	2	1	0	0	0
1038229	8	277804	8	263022	1	1	NAM8	1229.91	1190.46	20183.8	21622.6	51.0961	51.0961	1	1	TTTTGTTACCCTCAGGA	TTCTGTTACCCTCACAA	1	1	0	3	0	0	1
1039190	8	280426	8	265618	0	1	RTC3	518.298	2258.77	7062.51	30064.7	7.19224	29.6713	0.00566799	0.0123798	TCTTCTGAACGGAGTTT	TG--CTAAACCGGGTTT	0	0	2	4	0	0	0
1039287	8	280523	8	265712	1	1	RTC3	1061.62	849.648	17133.4	15109.4	7.50877	8.58096	0.000616909	0.00514103	CGCAATTGTCCCTTTCT	CGCAATTGT-CCTTTCT	0	0	1	0	0	0	0
1039339	8	280574	8	265764	1	1	RTC3	2135.22	2933.67	35356.3	43126.4	31.3451	31.3451	0.129291	0.129291	---CACTACCCTGTTGG	ATCCACTACCCTGCTGG	1	1	0	4	1	0	0
1056622	8	360776	8	346585	1	0	YHR127W	1015.21	330.702	16680.1	6724.51	46.3069	51.0961	0.93458	0.93458	TTCCCTTACCCGGTTGC	AACCGTTACCCGATTAT	1	1	0	6	0	0	1
1056659	8	360813	8	346613	1	0	YHR127W	656.638	121.834	9269.92	3413.88	7.38437	7.58616	0.00018062	0.00115975	ATCTCTAATCAATTCA-	ATTTCTAATCCATTCAT	0	0	1	2	0	0	0
1059400	8	374582	8	360445	1	1	YCK1	1029.03	1550.41	15438.5	21734.9	51.0961	51.0961	0.0534458	1	TGATGTTACCCCGCCTG	TGACGTTACCCTGCCAG	1	1	1	2	0	1	0
1059523	8	374463	8	360322	1	1	YCK1	895.671	538.538	11301.5	8386.55	11.9696	5.95152	4.71123e-05	5.4163e-05	GAAGCAAGCAGAAATCA	GAAGTAAGC-GAAATCA	0	0	1	1	0	0	0
1064222	8	390116	8	375710	1	1	DCD1	9664.23	5829.99	171054	106042	51.0961	51.0961	0.93458	0.93458	GTGTGTTACCCGTTAGG	GCGTGTTACCCGTTGAG	1	1	0	3	0	0	1
1064277	8	390061	8	375655	1	1	DCD1	7507.38	4211.85	117698	71158	8.07251	18.9347	8.01941e-05	0.00743201	GTAAATG---CTATGTA	-TACATAAGCCTATATA	0	0	4	3	0	0	0
1065929	8	393398	8	378917	0	1	MRPL6	302.487	1011.34	4531.69	16819.2	41.7646	41.7646	1	1	-TTCATTACCCTCTACT	CTTCATTACCCTCTGTT	1	1	0	3	0	0	1
1065957	8	393370	8	378889	0	1	MRPL6	193.838	791.062	3283.81	14083.4	8.45349	9.58538	0.00848272	0.00017904	CTCTATAACCGTAGCGT	CTCTATAACAGTATCGT	0	0	1	1	0	0	0
1067230	8	402810	8	388369	1	1	SPO16	1074.24	584.258	15769.4	10811.6	34.2135	34.2135	1	1	ATAGCTTACCCTGTTAA	GT-CCTTACCCTGTTAA	1	1	0	3	0	0	1
1068202	8	406889	8	392377	1	1	LAM1	977.007	1492.57	13985.1	22171.5	46.3069	51.0961	0.93458	0.93458	ACCTATTACCCGAACTT	ACCTGTTACCCGAAATT	1	1	0	2	0	0	1
1070953	8	439176	8	424680	1	1	CDC23	807.765	678.861	14901.7	12401	46.3069	46.3069	0.93458	0.93458	TTGTTTTACCCGAAGTG	TTGTTT-ACCCGAGGTA	1	1	1	2	0	0	1
1071890	8	443613	8	429123	1	0	NMD3	1124.02	267.431	18082.6	4502.01	51.0961	46.3069	0.93458	0.93458	-TAAGTTACCCGTCGGT	CTA--TTACCCGTCGGA	1	1	0	4	0	0	1
1071929	8	443650	8	429160	1	1	NMD3	1774.05	839.905	24191.4	14198.7	51.0961	46.3069	0.93458	0.93458	-TAAGTTACCCGTCGGT	CTA--TTACCCGTCGGA	1	1	0	4	0	0	1
1073135	8	448094	8	433639	0	1	SPC97	282.55	1024.52	9908.69	13199.5	41.7646	41.7646	1	1	TGCTATTACCCTTCCCC	TGCTATTACCCTTACTC	1	1	0	2	0	0	1
1073204	8	448162	8	433708	0	1	SPC97	467.485	751.157	8822.56	14116.1	9.13416	8.62677	0.000240098	0.000240098	TATTTT-GGCGTTTTTT	TATTTTTGGCGTTTTTT	0	0	1	0	0	0	0
1076613	8	456341	8	441923	0	1	ROF1	48.4162	1725.27	722.007	27033.4	5.63945	7.58616	0.000616909	0.00115975	ATG-ATAATTGCAGTTA	GTGAATAA-TCCAGTTA	0	0	2	2	0	0	0
1076684	8	456412	8	441993	0	1	ROF1	537.771	1877.8	10407.9	27702.8	46.3069	46.3069	0.93458	0.93458	ATGAATTACCCGCCTAC	TTGAATTACCCGCCTAC	1	1	0	1	0	0	1
1078116	8	459078	8	444668	1	0	STB5	541.315	498.586	6947.08	6393.52	35.6684	37.9012	0.0566279	0.0566279	CGCCATCACCCGCAGGG	CACTATCACCCGCCGGG	1	1	0	3	1	0	0
1080611	8	480890	8	466974	1	1	KOG1	803.618	1206.24	14248.5	21177.3	35.6684	27.9074	0.00465494	0.00093458	CCATTATAACCTCTGGA	CCATTATAAACTCTGGA	0	0	1	0	0	0	0
1080646	8	480855	8	466939	0	1	KOG1	148.08	586.493	3338.5	8207.04	35.6684	27.9074	0.00093458	0.00407897	GATTATCATCTCATAGT	GATTGTCATCCTATAGG	0	0	2	2	0	0	0
1085054	8	506194	8	492257	0	1	RPS4B	420.72	1037.17	6879.56	15398	51.0961	51.0961	0.93458	0.93458	AATCGTTACCCGTCGTT	AGTGGTTACCCGTCTTC	1	1	0	4	0	0	1
1085859	8	508765	8	494841	1	1	SCH9	677.02	882.39	11842.9	13994.9	51.0961	51.0961	1	1	TTTCGTTACCCTCGGTA	ATTCGTTACCCTCGGTA	1	1	0	1	0	0	1
1096647	9	310920	9	304057	1	0	YKE4	626.823	390.89	8606.64	7569.93	51.0961	51.0961	0.93458	0.93458	TTCAGTTACCCGGCCGG	----GTTACCCGGATGG	1	1	0	6	0	0	1
1109957	9	254500	9	247461	1	1	GPP1	1273.22	729.444	19830.5	12224.6	14.6407	14.6407	0.00457473	0.00457473	TGTCATTGCCGTGGACT	TGTCATTGCCGTGGACT	0	0	0	0	1	0	0
1110023	9	254566	9	247525	1	1	GPP1	2898.1	1660.6	47762.6	24877.1	26.346	26.346	0.0534458	0.0534458	GGGTCTTACCCCGCCAC	GGGTCTTACCCCGCCAC	1	1	0	0	1	0	0
1112291	9	249330	9	242320	1	0	RGI2	798.797	153.981	13418.9	2569.24	42.4042	42.4042	0.120833	0.120833	GGCAGCTACCCGCCCGC	GGCAGCTACCCGCCCGC	1	1	0	0	1	0	0
1113409	9	244630	9	239512	1	1	ARC15	1037.71	1686.28	16899.8	27622.1	46.3069	46.3069	0.93458	0.93458	TATGATTACCCGCACAT	TATAATTACCCGCACAT	1	1	0	1	0	0	1
1113471	9	244568	9	239450	0	1	ARC15	417.476	937.811	7381.93	13113.6	6.65691	11.0247	0.00408157	0.00408157	AGACTTTGCCCCTATAA	GGGCTTTGCCCCTATAA	0	0	0	2	1	0	0
1117447	9	232606	9	227510	1	1	RPS24B	881.887	987.897	14791.8	17848.9	23.9194	23.9194	0.00774498	0.001	ACTCTCTACCGTGAATT	ACTCT--ACCACGCATT	0	0	4	1	0	0	0
1118034	9	231268	9	226198	0	1	MAM33	455.594	1373.03	8424.44	22141.7	41.5523	41.5523	0.0465067	0.0465067	TACCAATACCCGGCGGT	TACCGATACCCGGCGGC	0	0	0	2	1	0	0
1120462	9	220851	9	215762	1	1	RPN2	1795.21	3593.93	30948.9	60090.7	46.3069	46.3069	0.93458	0.93458	TGCTATTACCCGCACTA	TGATATTACCCGCATTA	1	1	0	2	0	0	1
1120519	9	220795	9	215705	1	1	RPN2	918.819	1388.56	16318	24123.1	9.18802	8.90513	0.001	0.001	TTTTTTTTCCCTTGGAT	CATTTTTTCCCTTAGAT	0	0	0	3	1	0	0
1123492	9	204865	9	204861	0	1	CAB2	173.487	626.684	2803.14	11099.5	27.9074	27.9074	0.00605402	0.00093458	GAAA-ATACCCAAAACA	GGAAGATATCTAAAACG	0	0	2	3	0	0	0
1127544	9	169943	9	164057	0	1	SLM1	409.678	3050.89	9263.78	37014.3	10.602	10.602	0.0056036	0.0056036	ATTGATTAACGTTCCTG	A--GATTAACGTTCCTG	0	0	0	2	1	0	0
1127575	9	169912	9	164028	1	1	SLM1	1024.31	3263.63	16876.8	53977.7	51.0961	51.0961	1	1	TGG-GTTACCCTTCTCT	TGGTGTTACCCTTCATT	1	1	0	3	0	0	1
1127967	9	166241	9	160374	1	1	PFK26	909.182	1607.55	15769.1	23042.5	41.7646	41.7646	1	1	TAGTATTACCCTTCTTT	TAGTATTACCCTTCTTT	1	1	0	0	0	0	1
1128010	9	166199	9	160332	1	1	PFK26	817.454	1801.36	12572.1	27466.6	41.7646	41.7646	1	1	TAGTATTACCCTTCTTT	TAGTATTACCCTTCTTT	1	1	0	0	0	0	1
1128704	9	160556	9	154650	1	0	SEC24	719.03	189.38	11330.3	2731.49	51.0961	51.0961	0.93458	0.93458	TTTTGTTACCCGGC---	GTTGGTTACCCGGACTG	1	1	0	6	0	0	1
1130254	9	151484	9	145615	1	1	HOS4	1816.71	701.065	29814.8	14216.7	51.0961	51.0961	0.93458	0.93458	-CTTGTTACCCGGAAT-	CC--GTTACCCG--ATG	1	1	0	6	0	0	1
1131645	9	142735	9	136666	1	1	PRM5	4130.11	6702.13	70240.6	111416	34.2135	34.2135	1	1	GTTTCTTACCCTGACAT	ATTTCTTACCCTGA--T	1	1	0	3	0	0	1
1131701	9	142682	9	136611	1	1	PRM5	2398.28	727.921	35588	11726.9	5.9422	10.3996	5.8513e-05	0.000120833	CTAAACTACCAATTTTC	CTAAACTACCAGTTTTG	0	0	1	1	0	0	0
1131790	9	142594	9	136523	1	1	PRM5	2471.92	4797.99	45776.3	87055.6	5.56576	9.0794	0.00890915	0.000307965	ATGACTAATCCGAAGTT	ATGACTAATCAGAAATC	0	0	1	2	0	0	0
1132973	9	139495	9	133419	1	1	RPI1	11003.3	4373.57	209788	76459.3	46.3069	46.3069	0.93458	0.93458	TGCCATTACCCGTTAA-	TGCCATTACCCGTTAAA	1	1	0	1	0	0	1
1133004	9	139464	9	133388	1	1	RPI1	11319.2	12719.1	183133	209530	46.3069	46.3069	0.93458	0.93458	CAGGATTACCCGTCATA	CAGGATTACCCGAAATT	1	1	0	3	0	0	1
1134728	9	131856	9	125761	1	0	QDR2	573.72	165.021	7973.14	2414.21	6.93943	6.93943	0.00334993	6.73188e-05	TATCAATATCCTGTTTA	AATTAGTATCCTGTTTT	0	0	1	3	0	0	0
1134770	9	131898	9	125801	1	1	QDR2	988.05	877.592	16484.3	14937.4	46.3069	46.3069	0.93458	0.93458	GTTC-TTACCCGTCTGA	GCACTTTACCCGACTGA	1	1	0	4	0	0	1
1135626	9	129980	9	123885	0	1	POG1	238.436	637.496	3345.45	10049.7	8.81745	7.47668	0.000681559	0.001	CACAATATCCCCTTTGA	CACAATTTCCCTTTTAA	0	0	2	1	0	0	0
1135716	9	130070	9	123975	1	0	POG1	943.224	308.421	16766.4	5172.48	8.62698	16.6752	0.000255828	0.000465177	CCTTCATGTCCTGATTC	CCTTACTATCCCGATTT	0	0	3	2	0	0	0
1135765	9	130119	9	124022	1	1	POG1	1814.94	2280.08	26626.6	33314.7	46.3069	46.3069	0.93458	0.93458	CGCCATTACCCGTA-AA	CGCCATTACCCGTAGAA	1	1	0	1	0	0	1
1137993	9	122258	9	116202	1	1	KGD1	3595.11	5934.39	70032.6	100773	46.3069	26.6005	0.93458	0.0566279	AATAATTACCCGGCGGC	ATGTATCACCCGCCCGA	1	1	1	6	0	1	0
1138068	9	122333	9	116277	1	1	KGD1	1575.8	2040.55	21802.7	26357.6	19.8031	19.8031	0.00280502	0.00667645	TAGCTTCGACCGTTTGC	TAGCTTTGACCGTTTGC	0	0	1	0	0	0	0
1138397	9	117788	9	111746	1	0	RRT14	874.223	47.3872	10479.9	682.511	23.9194	41.5523	0.001	0.0465067	CCCTAATGCTC--TTTG	-CTTTATACCCGGTTTG	0	0	3	4	0	0	0
1138803	9	113455	9	107418	1	0	TAO3	767.627	352.545	12697.3	7124.24	6.28971	5.51597	0.00147139	0.000432855	-ATCACTAACCACGAAA	GATCACTAATTACGAAG	0	0	2	2	0	0	0
1138866	9	113400	9	107360	1	0	TAO3	830.275	451.548	15425.2	7569.47	5.91027	5.76488	0.00953278	0.00359791	TTGCCTAATCCTTTATC	TTACCGAATCCTTTATC	0	0	1	1	0	0	0
1143942	9	77818	9	71751	1	1	PAN6	556.628	676.24	9488.9	12131	51.0961	51.0961	0.141607	1	-AGGGTTACCCATACTG	GAAGGTTACCCTTTCTG	1	1	1	3	0	1	0
1144269	9	77500	9	71432	1	0	PAN6	2083.25	458.943	36583.6	8465.66	9.81251	12.8262	9.35439e-05	0.00111488	TACAGATA-TCACTCCT	TGCTGTTACTCACTTCT	0	0	2	3	0	0	0
1144298	9	77471	9	71403	1	1	PAN6	1572.8	1222.71	29758.7	21058.6	46.3069	46.3069	0.93458	0.93458	AACATTTACCCGGATAT	AACATTTACCCGGATTT	1	1	0	1	0	0	1
1144338	9	77434	9	71363	1	1	PAN6	3959.18	1717.67	65962.8	29507.9	46.3069	46.3069	0.93458	0.93458	AACATTTACCCGGATAT	AACATTTACCCGGATTT	1	1	0	1	0	0	1
1145294	9	73786	9	67718	1	1	SLN1	551.384	579.901	7285.84	7785.89	46.3069	46.3069	0.93458	0.93458	CCAAATTACCCGATCTT	CCAAATTACCCGATCTT	1	1	0	0	0	0	1
1148582	9	39324	9	33220	1	1	YIL161W	949.367	1741.71	16146.2	30387	46.3069	46.3069	0.93458	0.93458	ATACTTTACCCGGTTTC	ATACTTTACCCGGTTGC	1	1	0	1	0	0	1
1155641	9	360550	9	354680	1	1	MPH1	1018.31	650.057	16608.8	12933	51.0961	46.3069	0.93458	0.93458	AGCCGTTACCCGGTTTA	CGCA-TTACCCGGTTTA	1	1	0	3	0	0	1
1159810	9	380981	9	375136	1	1	VLD1	2334.56	2071.78	41779.5	36460.9	46.3069	51.0961	0.93458	0.93458	TATA-TTACCCGGTTTA	-ATCGTTACCCGGTTTT	1	1	0	4	0	0	1
1159855	9	381026	9	375180	1	1	VLD1	930.904	904.842	13418.6	13622.4	5.35823	6.20331	0.00743201	0.00743201	TCATCTAAGCCTTCGTC	TAATCTAAGCCTTCATC	0	0	0	2	1	0	0
1160815	9	384192	9	378291	0	1	MET28	358.022	736.978	5753.9	11577.6	20.2692	20.2692	0.00922781	0.00922781	ATTGGCTGCCCGGCCTT	ATTGGCTGCCCGGCCTT	0	0	0	0	1	0	0
1171962	10	434791	10	432605	1	1	OST1	1943.41	1558.17	28493.9	23272.1	34.2135	34.2135	1	1	CATACTTACCCTGCTCG	CATACTTACCCTGTTCG	1	1	0	1	0	0	1
1172011	10	434745	10	432556	1	1	OST1	1268.66	648.014	18885.9	14309.8	5.31959	9.0794	5.13513e-05	1.32464e-05	ACAAATTAATGTTTGCT	ACATAGTAGTAATTGCT	0	0	4	1	0	0	0
1172238	10	432519	10	430332	1	1	SYS1	761.838	770.954	11894.4	10427	37.9012	37.9012	0.132343	0.132343	GGCCATAACCCGGCTTT	GGCCATAACCCGGCTTT	1	1	0	0	1	0	0
1173288	10	424419	10	422242	1	0	CTK2	757.668	259.981	13246.7	4491.23	5.64761	11.0904	0.00514103	0.00115187	ATTTTTTGTC--CTTAT	AATTTTTGTCTTTTTAT	0	0	2	2	0	0	0
1173353	10	424365	10	422183	0	1	CTK2	163.175	1598.78	4105.33	22015.2	8.6975	8.0895	0.000898031	0.000825536	TGCATCAAGCCGTAGAC	TACAT-AAG--GTGGA-	0	0	3	3	0	0	0
1173449	10	424273	10	422091	1	1	CTK2	3420.4	3604.89	60486.2	59307.3	46.3069	46.3069	0.93458	0.93458	GAGCATTACCCGCCACA	GA-CATTACCCGCCACA	1	1	0	1	0	0	1
1173526	10	424201	10	422017	1	0	CTK2	922.434	130.23	14505.9	1890.62	10.4198	8.2888	0.000664688	6.36513e-05	AAGTAC----TGTCCTG	AAATACTTTATTTCTTG	0	0	5	2	0	0	0
1184084	10	383659	10	381864	1	1	HCA4	1408.05	596.586	24835.3	10083.5	34.2135	34.2135	1	1	TTTTCTTACCCTGATAA	TTTTCTTACCCTGATGA	1	1	0	1	0	0	1
1184514	10	381122	10	379335	1	0	TAD2	704.037	222.538	10708.7	3236.77	37.9012	37.9012	0.0566279	0.0566279	AATTT-CACCCGGCGCG	AATTTTCACCCGGCGCG	1	1	1	0	0	0	0
1186323	10	378642	10	376864	1	1	SNX4	1046.17	805.52	17179.9	12818.2	41.5523	41.5523	0.0465067	0.0465067	GGCGAATACCCGGCAGG	GGCGAATACCCGGCAGA	0	0	0	1	1	0	0
1189629	10	374060	10	353574	1	1	NUP192	1082.58	831.82	17525.5	13792	41.5523	41.5523	0.120833	0.120833	TCATACTACCCGGCCCG	TTCCGCTACCCGGCCCG	1	1	0	4	1	0	0
1190013	10	359891	10	367658	1	1	MHP1	780.429	1313.17	15802.6	22161.4	51.0961	46.3069	0.93458	0.93458	TTATGTTACCCGCTTCT	TGGCATTACCCGCCTCT	1	1	0	5	0	0	1
1191022	10	360888	10	366670	1	0	MHP1	713.85	514.319	11303	8195.73	18.1339	18.1339	0.0101068	0.0101068	AATGGTAGCCCGGGCCT	AATGGTAGCCCGGGCCT	0	0	0	0	1	0	0
1191071	10	360929	10	366621	1	0	MHP1	1244.37	227.353	15317.7	3406.33	18.1339	18.1339	0.00053044	0.00053044	TCTTTTAGGCCGTCGGC	TCTTTTAGGCCGCCGGG	0	0	0	2	0	0	0
1196448	10	339467	10	336475	0	1	IRC8	206.57	551.45	3547.02	7394.79	41.7646	41.7646	1	1	ATATATTACCCTGAACG	ATGTATTACCCTGAATA	1	1	0	3	0	0	1
1210134	10	265260	10	262278	1	1	DPB11	3989.4	1565.55	53461.8	22854.5	34.2135	34.2135	1	1	AAAACTTACCCTCATCA	CAAACTTACCCTCACCA	1	1	0	2	0	0	1
1210215	10	265181	10	262197	1	1	DPB11	2529.08	1045.58	46559.5	20566.1	18.4253	7.75747	0.00093458	0.0132464	CCTGGTAAAGCTATATA	CCTGGTAAACCTATATA	0	0	1	0	1	0	0
1214301	10	246324	10	243335	1	0	MRPL49	977.294	134.862	15717.8	2306.16	5.66949	10.4495	0.0113805	0.00278591	CGCTCTTAACCATAATC	CTATCTTAATTAT-ATC	0	0	2	3	0	0	0
1214371	10	246394	10	243404	1	0	MRPL49	1427.99	53.0199	21606.6	1156.54	23.9599	10.8246	0.129291	0.00890915	TTCGGCTACCCTTCGCA	TCCGGCTACTCTTCGCA	1	0	1	1	0	1	0
1215029	10	241731	10	238720	1	1	SAP185	559.736	956.194	9060.52	15979.2	51.0961	51.0961	1	1	TACCCTTACCCTCAGTC	TACCCTTACTCTCGGCC	1	1	1	2	0	0	1
1217788	10	223590	10	220598	1	0	SET4	1375.71	403.553	20878.2	6263.61	7.25725	7.25725	0.00714379	0.000699839	TTTTTTTGACCTCTTGA	TTTTTCAGACCTTTTTA	0	0	2	2	0	0	0
1217821	10	223622	10	220631	1	1	SET4	2190.81	876.317	32881	12117.4	51.0961	51.0961	0.93458	0.93458	TTCGGTTACCC-GGCTC	TT--GTTACCCGGGCTG	1	1	1	3	0	0	1
1218454	10	220765	10	217771	1	1	YJL107C	611.118	1182.09	14115.2	16202.8	46.3069	46.3069	0.93458	0.93458	ATGTATTACCCGCTGGT	GTATATTACCCGCCGGT	1	1	0	3	0	0	1
1218659	10	220574	10	217578	1	0	YJL107C	635.826	94.819	9666.89	1691.39	7.63549	9.18802	0.000857289	0.0136963	TTTCGTTCCCTTTGGCT	TTTCCTTCCCCTTGGCT	0	0	1	1	0	0	0
1218749	10	220504	10	217492	1	0	YJL107C	1379.81	119.425	21780.1	2271.4	46.3069	46.3069	0.93458	0.93458	AAATTTTACCCGGCTTA	ATATTTTACCCGG----	1	1	0	5	0	0	1
1220412	10	207634	10	204632	1	1	CCT7	997.598	1732.95	18644.3	29143.7	15.1487	8.21082	0.0763683	0.00848272	AGATGTTGCCCTGTCAT	GGATATGGCCCTATCAT	1	0	1	3	0	1	0
1220442	10	207664	10	204662	1	1	CCT7	2495.85	2677.21	44754.4	47221.6	46.3069	46.3069	0.93458	0.93458	TATCCTTACCCGGAAA-	TCTACTTACCCGGTGAA	1	1	0	5	0	0	1
1223102	10	195637	10	199260	1	0	NCA3	828.967	13.9425	12104.6	206.814	13.9221	24.9591	0.00432458	0.00566799	AACTTTCAACAACCGGG	AACTTTCAACCTCCGGT	0	0	2	1	0	0	0
1223240	10	195506	10	199123	1	1	NCA3	2248.19	1282.37	35527.3	21411.3	51.0961	51.0961	0.121659	0.121659	TCCCGTTACCCATCTAT	TCCCGTTACCCATGTAT	1	1	0	1	1	0	0
1223354	10	195393	10	199009	1	0	NCA3	669.467	445.55	11958.8	7882.1	6.03655	15.1012	0.00457473	0.129291	CTCTCATACCATATTAA	CTCTCCTACCCTATTAA	0	1	2	0	0	0	0
1223794	10	192308	10	195915	1	1	PHO86	1085.49	1140.12	17043.9	17147.2	41.7646	41.7646	0.121659	0.121659	CCGCATTACCCAGCGCG	CCGCATTACCCAGCGCG	1	1	0	0	1	0	0
1223846	10	192360	10	195967	0	1	PHO86	461.943	561.072	7375.82	8424.04	14.565	14.565	7.50526e-05	7.50526e-05	GGTCGTTATTCATTATA	GGTCGTTATTCATTATA	0	0	0	0	0	0	0
1225117	10	187934	10	191549	1	1	LSM1	632.013	2095.44	11045.8	35932.3	51.0961	51.0961	0.93458	0.93458	ACTTGTTACCCGCGTTC	ATTTGTTACCCGCGTCC	1	1	0	2	0	0	1
1232365	10	150663	10	154357	0	1	YAK1	0	1085.05	0	19875.2	10.1469	33.3162	0.141607	0.141607	TTTATTAACCCTAACCG	TGTAGTAACCCTACCTG	1	1	0	4	1	0	0
1232447	10	150584	10	154275	0	1	YAK1	72.2075	739.372	1230.49	12257.4	17.5047	17.5047	0.0534458	0.0534458	CAGATTTACCCCTTCTG	CAGATTTACCCCTTCTG	1	1	0	0	1	0	0
1232870	10	146878	10	150576	1	1	TIM17	1343.76	807.419	21060.7	14433.1	20.0645	4.49079	0.00281793	0.000181428	A---TACACCCGAAGAT	ACAGTACACCTGTAGAT	0	0	1	4	0	0	0
1232904	10	146908	10	150608	1	1	TIM17	1123.68	1203.31	19122.4	18441.3	20.0645	8.16627	0.00281793	0.000181428	A---TACACCCGAAGAT	ACAGTACACCTGTAGAT	0	0	1	4	0	0	0
1232945	10	146943	10	150646	1	1	TIM17	2128.26	2992.86	41469.4	49716	51.0961	31.8197	0.132343	0.0566279	GTGGGTAACCCGGCATT	--GAGTCACCCGG-TTT	1	1	1	5	0	0	0
1236084	10	137224	10	140887	1	1	SNA3	2324.27	2601.02	39692	41353.6	41.7646	41.7646	1	1	AAGTATTACCCTACTTT	AGATATTACCCTGCTGT	1	1	0	4	0	0	1
1236125	10	137185	10	140846	1	1	SNA3	909.219	1056.13	15508.1	13902.1	8.57596	6.39625	0.001	0.0136963	CCCTTTTCCTCTACTTG	CCCTTTTCCCCTACTTG	0	0	1	0	0	0	0
1239060	10	123526	10	127282	1	1	CIS3	990.646	2600.06	17999.3	39699.9	51.0961	51.0961	0.93458	0.93458	GAGGGTTACCCGGCTGC	TAATGTTACCCGG-TGT	1	1	0	5	0	0	1
1239214	10	123382	10	127145	0	1	CIS3	173.456	935.251	2264.37	14749.4	6.98036	6.98036	5.77116e-05	0.000443338	CCTGCAAATCCACGGCT	CTTGCAAATCCGCGGCT	0	0	1	1	0	0	0
1244516	10	106276	10	109470	0	1	QCR8	96.8325	547.023	1897.15	8856.49	36.3043	36.3043	0.120833	0.121659	AAATTTTATTCATATAA	AAAATTTACCCATATAA	1	1	2	1	0	0	0
1250383	10	83340	10	86494	1	0	ATG36	704.334	189.781	8997.83	3161.15	46.3069	41.5523	0.93458	0.120833	ATTT--TACCCGGATCT	ATTTGCTACCCGGCTCT	1	1	1	2	0	1	0
1250426	10	83301	10	86457	1	1	ATG36	1028.92	917.075	14779.2	15020.9	46.3069	41.5523	0.93458	0.120833	ATTT--TACCCGGATCT	ATTTGCTACCCGGCTCT	1	1	1	2	0	1	0
1250583	10	83150	10	86304	0	1	ATG36	294.656	5435.44	6079.34	76996.5	10.1185	9.13416	0.000299489	1.86602e-05	GTATCTTAACGCGAATG	--ATTTTAATT-GAATA	0	0	3	4	0	0	0
1250658	10	83078	10	86230	0	1	ATG36	78.4906	4329.65	2259.67	84523	13.3898	29.3794	0.001	0.129291	AAATCTATCCCTTCAAA	A--TCTA-CCCTTCAAA	0	1	1	2	0	0	0
1253747	10	69081	10	72136	1	1	ELO1	1040.18	1728.33	17134.9	25210.9	41.7646	41.7646	0.121659	0.121659	CTGAATTACCCAAAGAA	CTGGATTACCCAAAGAA	1	1	0	1	1	0	0
1253868	10	68963	10	72016	1	1	ELO1	4109.04	3627.3	60006.3	48499.7	46.3069	46.3069	0.93458	0.93458	TTGGCTTACCCGCGTCG	TTGACTTACCCGCGTCG	1	1	0	1	0	0	1
1254522	10	60205	10	63137	1	0	PHO90	9964.29	4.64751	182017	72.0364	51.0961	7.22381	1	0.00400808	TTATGTTACCCTTTTTT	ATA----ACTTTTTTTT	1	0	4	3	0	1	0
1254608	10	60287	10	63219	1	0	PHO90	9528.37	316.431	170010	5965.6	51.0961	46.3069	0.93458	0.93458	TGCTGTTACCCGCTATC	TGCCATTACCCGCGATT	1	1	0	4	0	0	1
1260871	10	26449	10	27609	0	1	IMA5	4.57847	1580.93	50.3632	25468.4	8.40702	8.31873	0.001	0.00115975	TCGGATTATCTAGCTTT	TCATATAATCCAGTTTT	0	0	2	3	0	0	0
1263604	10	442785	10	440604	0	1	MRX12	476.193	940.6	9141.02	17490.9	7.56344	34.2135	0.0673188	1	AGTTCTTATCCTTTTCC	AGTTCTTACCCTTTTCC	1	1	1	0	0	1	0
1263707	10	442693	10	440505	1	1	MRX12	2254.59	1209.93	37416.1	20348.9	46.3069	46.3069	0.93458	0.93458	T-TCATTACCCGAAGGC	TCCCATTACCCGAAGAC	1	1	0	3	0	0	1
1263762	10	442648	10	440451	1	0	MRX12	706.918	311.079	10039.1	6148.43	8.91412	8.91412	0.000158247	0.000904172	CTACTGAAAC-------	CTACTTAAGCCACTCAA	0	0	4	5	0	0	0
1264064	10	445782	10	443588	1	1	SAG1	904.213	1018.06	11866.8	14812.9	41.5523	41.5523	0.0465067	0.0465067	GAGCGATACCCGGAAGA	GAGCGATACCCGGCAGG	0	0	0	2	1	0	0
1266547	10	450784	10	448590	1	1	SUI2	1067.75	2038.4	15621.6	30028.7	46.3069	46.3069	0.93458	0.93458	TTTTCTTACCCGCAGTC	ATTTCTTACCCGCCGTT	1	1	0	3	0	0	1
1267553	10	455910	10	453750	0	1	TDH2	241.634	550.984	4745.04	6774.55	12.7196	9.58096	0.000379891	0.000157875	--ATTCTAGCGGTCCCT	GAAT----GCGGTTCCC	0	0	3	5	0	0	0
1267678	10	455804	10	453636	0	1	TDH2	155.405	743.762	2358.94	11186.6	7.47668	51.0961	1.71107e-05	0.0534458	TAGCG-----CCAACGC	AACCGTTACCCCAATAT	0	1	5	5	0	0	0
1268387	10	455179	10	452969	1	0	TDH2	890.812	210.773	13549.6	4603.73	41.7646	41.7646	1	1	CATCATTACCCTGGAAA	CAACATTACCCTGGAAA	1	1	0	1	0	0	1
1279140	10	525923	10	513660	1	1	ANB1	1314.13	1374.33	20917.4	24254.9	51.0961	51.0961	1	1	TACTGTTACCCTGAATC	AATTGTTACCCTGTATC	1	1	0	3	0	0	1
1285425	10	545654	10	539778	1	0	APS2	1681.35	129.815	26442	2482.17	12.1226	11.197	0.0599034	0.0599034	TGCTTTTACCGTCAACC	AGCTCTTACCGTCAACT	1	1	0	3	1	0	0
1285567	10	545512	10	539637	1	0	APS2	2937.22	293.013	47385.1	4259.79	21.3438	21.3438	0.00929091	0.00465494	CGCCTTTGCCCAAGAGG	GGTTTTTGCTCAAGAGG	0	0	1	3	0	0	0
1285600	10	545479	10	539604	1	1	APS2	1559.66	619.401	22451.3	8265.46	21.3438	21.3438	0.00323838	0.00323838	TACGGTCACCCCATCTA	CACGGTCACCCCACCTA	0	0	0	2	1	0	0
1288172	10	559306	10	553371	1	1	ARP3	3184.9	2864.99	59473.3	51825	37.9012	37.9012	0.0566279	0.0566279	AGTAGTCACCCGGCTGT	AACGGTCACCCGGCCAT	1	1	0	5	1	0	0
1288235	10	559244	10	553309	1	1	ARP3	1810.76	2164.66	28854.8	31158.3	7.32181	7.32181	0.00118482	0.000167779	TTAAACTACTCTCATAT	CTAAACAACTCTCATAT	0	0	1	1	0	0	0
1290892	10	576965	10	571068	1	0	CDC11	762.436	196.806	12899.1	3387.34	7.65657	7.65657	0.00704664	0.00704664	CCGTTAAACCCTTTGCT	CCGTTAAACCCTTTGCT	0	0	0	0	1	0	0
1291079	10	576797	10	570893	1	1	CDC11	1269.61	1721.12	21912.8	24257.5	51.0961	51.0961	0.93458	0.93458	GGTCGTTACCCGACC-A	GTTTGTTACCCGACCTT	1	1	0	4	0	0	1
1291150	10	576728	10	570822	1	1	CDC11	652.604	986.092	10947.3	16828.7	9.2007	9.2007	6.29148e-05	6.29148e-05	TTTATTTTTCCGCCTTC	TTCATTTTTCCGCCTTC	0	0	0	1	1	0	0
1294479	10	585915	10	580006	0	1	TMH11	234.137	858.033	4918.77	15217.3	51.0961	51.0961	0.93458	0.93458	CCCTGTTACCCGGTT-T	CTCTGTTACCCGGATAT	1	1	0	3	0	0	1
1295661	10	594800	10	588913	1	0	GRR1	2463.63	85.1544	36931.7	1806.41	41.7646	4.55765	0.121659	0.00381212	ATTTATTACCC--AGAT	ACTTATCATCCGAAGAT	1	0	3	2	0	0	0
1295731	10	594738	10	588847	1	1	GRR1	3543.28	1431.1	60449.5	20017.4	51.0961	51.0961	0.93458	0.93458	TGAGGTTACCCGCCTAT	CAGGGTTACCCGCAGAT	1	1	0	5	0	0	1
1296142	10	598505	10	592619	1	1	JSN1	2279.4	2824.78	37175	44898.3	46.3069	46.3069	0.93458	0.93458	ACAAATTACCCGCCGAC	ACAAATTACCCGCCGAC	1	1	0	0	0	0	1
1296225	10	598423	10	592537	1	1	JSN1	1771.35	1648.9	26828	24821.5	5.85685	5.85685	0.00407897	0.00407897	ATTGGTCATCCTACGAG	ATTGGTCATCCTACGAG	0	0	0	0	1	0	0
1299964	10	612208	10	606394	0	1	JJJ3	289.086	1933.42	3785.3	31926.4	51.0961	51.0961	0.93458	0.93458	----GTTACCCGCTCAT	ACGGGTAACT-----AT	1	1	4	7	0	0	1
1300008	10	612240	10	606428	1	0	JJJ3	692.378	58.1272	11965.3	1066.43	51.0961	51.0961	0.93458	0.93458	----GTTACCCGCTCAT	ACGGGTAACT-----AT	1	1	4	7	0	0	1
1300047	10	612279	10	606467	0	1	JJJ3	143.302	1337.42	2610.9	21483.4	11.197	10.0769	0.001	0.00953278	GTTACTAGTCTTACCAT	GTTACTAATCCTATCAC	0	0	2	2	0	0	0
1308632	10	647285	10	642194	1	1	JHD2	3419.08	3551.57	54173.3	58403.4	37.9012	37.9012	0.00732148	0.00732148	GGGGCCCACCCGGCACG	GGGGCCCACCCGGCACG	0	0	0	0	1	0	0
1308763	10	647154	10	642063	1	1	JHD2	1275.96	3490.8	20160.9	54345.6	37.9012	37.9012	0.0490501	0.0490501	CGCAATTAGCCGCCCAT	CGCAATTAGCCGCCCAT	1	1	0	0	1	0	0
1309168	10	646788	10	641686	0	1	JHD2	35.0231	15957.2	971.477	217807	10.2673	51.0961	0.000538141	1	GGT--TACACCTAGGGT	GGTGTTAC-CCT----T	0	1	1	6	0	1	0
1309243	10	646716	10	641613	1	1	JHD2	2800.41	2408.88	37433.9	37623.7	13.2196	13.2196	0.0497621	0.0497621	AGCCCATACCCTACACA	GGCCCATACCCTATGTA	1	1	0	4	1	0	0
1309293	10	646666	10	641563	1	1	JHD2	3154.66	16051.6	54560.3	279369	33.3162	33.3162	0.141607	0.141607	TAAAGTAACCCTGGAAT	TAAAGTAACCCTGGAAT	1	1	0	0	1	0	0
1311069	10	649576	10	644493	0	1	IBA57	514.637	1413.41	7830.25	21905	41.7646	41.7646	1	1	GTGTATTACCCTGATTT	TTGTATTACCCTGATTT	1	1	0	1	0	0	1
1314531	10	663706	10	658586	1	1	RSF2	796.442	682.529	13674.6	9982.52	6.12867	5.6884	8.73583e-05	0.000566316	TAGAATTAACAAAT-AA	TA-AAATAACCAATGAA	0	0	2	2	0	0	0
1314629	10	663616	10	658501	1	1	RSF2	987.094	1627.24	18015.7	25607.2	51.0961	51.0961	1	1	CTCGGTTACCCT-TCAA	TTCCGTTACCCTATCAA	1	1	0	3	0	0	1
1318326	10	683604	10	678544	1	0	MET5	994.734	252.987	16422.9	4888.36	41.7646	41.7646	0.000625453	0.00890915	AGAGATAATACGCACGT	AGAGATAATCCGCACGT	0	0	1	0	0	0	0
1321778	10	705437	10	700389	1	1	BAT2	1164.51	1161.41	18976.7	18930.1	26.6005	26.6005	0.0566279	0.0566279	AAGTGTCACCCGAAAGC	AAGTGTCACCCGAAAGC	1	1	0	0	1	0	0
1330082	11	437670	11	459383	0	1	MRP17	314.71	722.245	5944.02	12933.2	5.97921	6.12867	0.00407897	0.0673188	GGACTTCGTCTCCTCCT	GGTCTTTATCCTCTCCT	0	1	4	1	0	0	0
1330117	11	437635	11	459349	1	1	MRP17	1018.69	2057.15	18565.8	34356.3	38.2066	38.2066	0.132343	0.132343	TCATCTAACCCGGAAAA	TCATCTAACCCGGAGAA	1	1	0	1	1	0	0
1330195	11	437558	11	459271	0	1	MRP17	288.902	723.561	4773.33	10892.3	6.28971	6.97324	0.0524835	0.0132464	AGACTTTAGCCTTTTAA	AGACTTTAGCCATATAA	1	0	1	1	0	1	0
1330715	11	429224	11	450929	1	1	LAC1	858.877	1121.08	11155.2	15858	7.34944	7.11293	0.000825536	0.00678565	CAGTACTAGCC-ACTGT	TACTACTAGCCTACTAC	0	0	1	4	0	0	0
1330755	11	429185	11	450889	1	1	LAC1	1611.75	1736.35	25077.5	27486.6	37.9012	38.2066	0.132343	0.132343	GATCATAACCCGGCTAT	GTTGGTAACCCGGATAT	1	1	0	4	1	0	0
1333245	11	408231	11	429955	0	1	ATP7	487.121	898.279	7664.9	13757	36.8576	36.8576	0.132343	0.132343	TCTTGTAACCCGC--TC	TATAGTAACCCGCCCTC	1	1	0	4	1	0	0
1333290	11	408186	11	429910	0	1	ATP7	400.764	576.11	5862.03	7614.2	6.82776	7.27342	0.000407549	0.00400808	GGATATTTGTCTTGATG	GGATATTGGCCTTGATG	0	0	2	0	0	0	0
1334796	11	392443	11	414141	1	1	PAN3	546.274	1051.71	7928.52	15907.7	5.81832	5.81832	0.00380025	0.00380025	ATTATATGCCCTCCCCT	ATTATATGCCCTTCCCT	0	0	0	1	1	0	0
1334857	11	392386	11	414084	1	1	PAN3	912.179	1752.32	14775.1	28242	51.0961	51.0961	1	1	TAAGGTTACCCTGT--A	TAGGGTTACCCTAACAA	1	1	0	5	0	0	1
1335230	11	390081	11	406395	1	0	GPX1	876.319	82.309	13696.3	1408.63	34.2135	34.2135	1	1	ATCGCTTACCCTATAGA	CTCGCTTACCCTATAAA	1	1	0	2	0	0	1
1337205	11	382468	11	398016	0	1	IXR1	32.3916	613.303	885.334	9466.19	6.93558	35.0841	0.0599034	0.00093458	GATAATTACCGTTCTTG	AATGATTACTGTTCTTG	1	0	1	2	0	1	0
1338253	11	371549	11	387499	0	1	TUL1	380.821	687.251	7499.6	11839	5.0837	15.1012	8.73583e-05	0.0157294	AATTCTTCACTCACGTC	AGTTCCT-ACCCACATC	0	0	3	2	0	0	0
1338310	11	371605	11	387553	1	1	TUL1	709.078	632.182	10947.1	10147.2	26.346	26.346	0.0534458	0.0534458	GACCCTTACCCCGCCAA	AACCCTTACCCCGCCAA	1	1	0	1	1	0	0
1338356	11	371650	11	387598	1	1	TUL1	1472.69	2166.07	22293	33687.2	26.346	26.346	0.0534458	0.0673188	TACGTTTATTCTATTTC	TACGTTTATCCTATTTC	1	1	1	0	0	1	0
1345956	11	352993	11	368955	1	1	DCW1	1324.59	725.809	23748.4	13522.8	31.8197	31.8197	0.0566279	0.0566279	TCCCGTCACCCGGTTTT	TCCCGTCACCCGGTTTC	1	1	0	1	1	0	0
1346075	11	352876	11	368836	1	0	DCW1	613.191	449.188	8917	8221.82	6.97324	10.89	0.000443338	0.000443338	TCATGAAATCCGAGCTT	TCAGGAAATCCGAGCTT	0	0	0	1	0	0	0
1347854	11	340806	11	356695	1	1	ASK1	1833.08	759.014	25933.6	13974.6	10.8067	10.8067	0.000239092	0.0136963	CTCCGTTCCTCTATGAC	CTCCGTTCCCCTATGAC	0	0	1	0	0	0	0
1347933	11	340727	11	356616	1	1	ASK1	2507.85	3031.03	45098.4	53525.1	51.0961	51.0961	0.93458	0.93458	TTCTGTTACCCGCGCGG	TTCTGTTACCCGCGCGG	1	1	0	0	0	0	1
1349830	11	334163	11	350080	1	1	NUP120	1226.37	1773.76	19892.6	26561.8	41.7646	41.7646	1	1	TTCCATTACCCTACAGA	TTTCATTACCCTACATA	1	1	0	2	0	0	1
1349891	11	334103	11	350019	0	1	NUP120	160.595	864.664	3071.61	15002.9	4.97075	4.70918	0.000112172	1.06279e-05	TCTTTTTCTCCAATTAC	TCTTTCTCTTCAATTAT	0	0	2	1	0	0	0
1350157	11	330077	11	345996	0	1	MPE1	441.932	2155.38	10668.6	39120.7	9.9732	9.9732	0.000576551	0.000801155	ATTCCTTATTCGGTCGA	ATTCCTTAATCGGTCGA	0	0	1	0	0	0	0
1350192	11	330042	11	345961	1	1	MPE1	2802.29	4609.94	52466.6	84522	46.3069	51.0961	0.93458	0.93458	TTAGCTTACCCGGCAAT	ATAGGTTACCCGACAGC	1	1	0	5	0	0	1
1350374	11	329875	11	345789	0	1	MPE1	356.334	1410.59	4474.69	20561.3	7.04591	6.32095	0.0113805	0.00131565	TG---TTAACCAAAGAA	TTCCCTTAACTAA-GAA	0	0	1	5	0	0	0
1350636	11	329630	11	345551	1	0	MPE1	806.914	285.18	11858	5190.75	6.11598	6.38437	0.00465494	0.00129768	-TGCAATAAC-CTTCCT	CTATAATAACTCTT-CA	0	0	1	5	0	0	0
1350694	11	329576	11	345493	1	1	MPE1	830.093	1608.84	14139	24537.9	51.0961	46.3069	0.93458	0.93458	TAAAGTTACCCGCCTGA	AGATATTACCCGCTTGA	1	1	0	5	0	0	1
1352110	11	325641	11	341484	1	1	BLI1	1365.05	951.655	23081.4	17010.6	41.7646	41.7646	1	1	TATTATTACCCTCTTAT	TA-TATTACCCTCATTT	1	1	0	3	0	0	1
1352183	11	325710	11	341556	1	0	BLI1	1133.62	146.562	19874.7	3326.24	41.7646	23.9194	0.121659	0.001	GTCCATTACCCAGCGCT	ATGC-TTAGTTAGCGCT	1	0	3	3	0	0	0
1352928	11	322589	11	338447	0	1	YKL063C	18.3139	1258.51	352.542	20046	12.8498	42.4042	0.000121659	0.00093458	CAACAGTACCCACCAGC	CAACAGTACCCGCCAGC	0	0	1	0	0	0	0
1352989	11	322528	11	338389	0	1	YKL063C	30.1024	2660.12	453.482	42100.9	8.5643	15.1487	0.00457473	0.0763683	TGCGGTTGCCGTTCCTT	TGCGGTTGCCCTTCTTT	0	1	1	1	0	1	0
1353626	11	321909	11	337764	1	0	YKL063C	1040.61	338.927	18480.7	6450.23	23.9599	15.1012	0.129291	0.129291	AAGGGCTACCCTTAAAA	AAGGCCTACCCTTAAAA	1	1	0	1	1	0	0
1354093	11	317423	11	333345	0	1	YET1	454.024	1717.89	8435.23	28347.7	6.34966	5.64195	0.00065917	0.00065917	CCATAAAAACCTAGATA	-CATAAAACCTTAGATA	0	0	2	1	0	0	0
1354257	11	317283	11	333197	1	1	YET1	1254.16	1908.31	17575.5	31853.9	36.8576	36.8576	0.132343	0.132343	ACATGTAACCCGCAGCT	GCGCGTAACCCGCAGCT	1	1	0	3	1	0	0
1357104	11	309957	11	325840	1	1	NUP100	2006.74	836.595	33710.6	13971.1	51.0961	51.0961	0.121659	0.121659	AAGTGTTACCCATCTTG	AAGTGTTACCCATCTTG	1	1	0	0	1	0	0
1357199	11	310052	11	325934	1	0	NUP100	696.168	171.118	12587.4	3306.7	6.93943	5.19588	6.73188e-05	4.32486e-05	CATATTTATGCTGAAGT	CATATCAATGCTGAAGT	0	0	2	0	0	0	0
1360774	11	299241	11	313513	1	1	STB6	3633.35	974.007	60461.3	16077.7	38.2066	51.0961	0.0566279	0.93458	TTTAGTCACCCGGACAT	TCTTGTTACCCGATTGT	1	1	1	6	0	1	0
1363157	11	284752	11	299152	1	1	VMA5	1349.79	1618.39	16118	20902.5	8.45349	8.45349	0.000203108	0.000566316	CGAAAAAAACAATTTTC	CGAAAATAACCATTTTC	0	0	2	0	0	0	0
1363201	11	284796	11	299196	1	1	VMA5	2620.71	3535.36	37670.2	51293.9	51.0961	51.0961	0.93458	0.93458	GTATGTTACCCGAACTG	GCACGTTACCCGAACTG	1	1	0	2	0	0	1
1363575	11	282739	11	297145	0	1	RRP14	527.747	685.112	8607.42	10665.5	41.7646	21.3438	1	0.0605918	GCGCATTACCCTGCCGG	GCGCGTCACCCTGCCGG	1	1	1	1	0	1	0
1365197	11	278060	11	292505	1	1	CYT2	1568.96	3146.28	21284.1	58635.2	51.0961	51.0961	0.93458	0.93458	-GCCGTTACCCGTTGCG	CGCCGTTACCCGCCGTT	1	1	0	5	0	0	1
1365236	11	278021	11	292466	1	1	CYT2	730.319	1093.5	12122.4	17594.2	6.56816	6.56816	0.00743201	0.00743201	GTTTGTAAGCCTT--CT	GTTTGTAAGCCTTTACT	0	0	0	2	1	0	0
1373649	11	245771	11	260079	1	1	GFA1	2636.91	1678.4	50326.4	31001.5	51.0961	51.0961	0.93458	0.93458	GCGCGTTACCCGGATTG	GCACGTTACCCGACGTA	1	1	0	5	0	0	1
1373758	11	245662	11	259970	1	0	GFA1	1041.86	301.743	16507.6	4957.15	5.9161	5.9161	0.000129291	0.000922021	GCGACTTTTCCTCTTCT	GCGACTTCTCCTCTTCT	0	0	1	0	0	0	0
1374255	11	242920	11	257221	0	1	SEG2	373.393	568.34	6219.46	10213.5	46.3069	46.3069	0.93458	0.93458	GCGTTTTACCCGCAGGA	CCTTTTTACCCGCAGGA	1	1	0	2	0	0	1
1377531	11	226377	11	240678	1	1	RAD27	762.549	750.4	15216.9	13912.4	10.3996	6.97324	0.001	0.000681729	ACTTCTTTCCCTGTTCT	ACTTCTTCCTCTGTTCT	0	0	2	0	0	0	0
1377615	11	226293	11	240594	1	1	RAD27	2441.47	1615.69	32669.7	23620.8	41.5523	41.5523	0.00297203	0.0490501	GTGATTCAGCCGGGTAC	TTTTTT-AGCCGGGTAC	0	1	1	3	0	0	0
1377681	11	226228	11	240529	1	0	RAD27	1477.04	271.024	24824.9	4067.56	37.9012	37.9012	0.0465067	0.00281793	GACAGATACCCGATTGG	ATGAGACACCCGATTGG	0	0	1	3	0	1	0
1379000	11	220134	11	234398	1	0	VPH2	805.579	338.401	13850.8	6636.9	42.4042	42.4042	0.120833	0.120833	TAATGCTACCCGCCTTC	TAATGCTACCCGCCTTC	1	1	0	0	1	0	0
1381522	11	213124	11	228004	1	1	SRP21	1343.98	1846.5	20798.9	27207.8	34.2135	34.2135	1	1	GCGGCTTACCCTGCCTT	GCAGCTTACCCTGCCAT	1	1	0	2	0	0	1
1381561	11	213085	11	227965	1	0	SRP21	724.765	122.396	11868.5	2900.23	6.82776	5.63316	0.000381806	4.71123e-05	TTCGATTGACCCAAATA	TTCAAGTGGCCCAAATA	0	0	2	1	0	0	0
1382418	11	207967	11	222850	1	1	RRN3	1553.14	1040.48	27782.1	18639.8	34.2135	34.2135	1	1	CTCTCTTACCCTTCCGA	CCCTCTTACCCTTCCGA	1	1	0	1	0	0	1
1382512	11	208058	11	222944	1	1	RRN3	790.47	634.458	14241	11733.3	5.91172	5.91172	0.000922021	0.000922021	AAATTTTCTCCTTGTAT	AAATTTTCTCCTTGTAT	0	0	0	0	1	0	0
1389698	11	178291	11	192644	1	0	MRP8	1050.91	432.403	15976.8	5927.74	46.3069	46.3069	0.93458	0.93458	AATTATTACCCGG----	ATTTCTTACCCGGAATA	1	1	0	6	0	0	1
1390439	11	173995	11	188351	1	1	RPT1	2843.92	700.844	37513.3	10756.3	46.3069	46.3069	0.93458	0.93458	TGAGTTTACCCGGACGA	TGGATTTACCCGGACTT	1	1	0	4	0	0	1
1390485	11	174041	11	188397	1	1	RPT1	2582.04	638.085	40348.2	11484.6	46.3069	46.3069	0.93458	0.93458	TGAGTTTACCCGGACGA	TGGATTTACCCGGACTT	1	1	0	4	0	0	1
1390860	11	171643	11	185988	1	0	SDH1	1791.03	444.922	27960.4	10369.6	51.0961	46.3069	0.93458	0.93458	TTGG-TTACCCGGTCGG	--GGATTACCCGGATGA	1	1	0	6	0	0	1
1390918	11	171592	11	185935	1	1	SDH1	551.298	566.705	7131.34	7509.47	9.0794	5.32538	0.00111488	0.000728003	AGGATTTACTCATACAG	AAGATTCGCTCATACGC	0	0	2	3	0	0	0
1391024	11	171486	11	185831	0	1	SDH1	436.596	887.033	6754.92	12771.6	13.1977	13.1977	0.00407897	0.000598268	GAGGATCATCCTCTATT	--TGACCATCCTCTATC	0	0	1	4	0	0	0
1406770	11	99750	11	111842	1	1	FAS1	819.678	604.813	12232.9	11528.7	9.78459	9.78459	0.00743201	0.00743201	TTAACTAAGCCTTCGCG	TTAACTAAGCCTTCGCG	0	0	0	0	1	0	0
1406902	11	99882	11	111974	1	1	FAS1	1069.23	2101.14	15749.7	36291.7	37.9012	46.3069	0.132343	0.93458	TGCTATAACCCGGCCTC	TACTATTACCCGGCCTT	1	1	1	2	0	1	0
1412864	11	82810	11	94605	1	1	CNB1	1035.49	1496.42	17209.9	22995.7	41.5523	41.5523	0.0465067	0.0559846	CTTTTTTAGCGGAATGC	CTTTTTTACCGGAATGC	0	1	1	0	0	1	0
1412905	11	82851	11	94646	0	1	CNB1	534.876	786.937	8576.06	11499.3	6.2054	8.06649	0.00293827	0.0559846	CTTTTTTAGCGGAATGC	CTTTTTTACCGGAATGC	0	1	1	0	0	0	0
1417550	11	63659	11	69909	0	1	TOR2	331.377	795.082	4946.14	12538	46.3069	46.3069	0.93458	0.93458	AATATTTACCCGGATAT	GAAATTTACCCGGATAT	1	1	0	2	0	0	1
1427885	11	442920	11	464583	1	0	VPS1	1760.18	329.323	22024.2	5438.27	42.3227	37.9012	0.00737155	0.0566279	TTGGGTGACCCGGCCAC	CCAGGTCACCCGGCTGG	0	1	1	6	0	0	0
1427922	11	442883	11	464546	1	1	VPS1	2815.17	1109	43717.1	17727.3	42.3227	37.9012	0.00737155	0.0566279	TTGGGTGACCCGGCCAC	CCAGGTCACCCGGCTGG	0	1	1	6	0	0	0
1429802	11	451313	11	472965	1	1	YKR005C	965.229	1146.04	15770.4	20536.6	42.4042	42.4042	0.120833	0.120833	GTCAGCTACCCGCCTCA	GCCGGCTACCCGCCTCA	1	1	0	2	1	0	0
1433723	11	462944	11	484787	1	0	YKR011C	1167.21	253.016	18273.9	4710.32	46.3069	51.0961	0.93458	0.93458	AATCATTACCCGGCCT-	AAT-GTTACCCGGAATA	1	1	0	5	0	0	1
1433761	11	462909	11	484750	1	0	YKR011C	949.489	95.3851	17656.7	1621.55	46.3069	51.0961	0.93458	0.93458	AATCATTACCCGGCCT-	AAT-GTTACCCGGAATA	1	1	0	5	0	0	1
1436906	11	483302	11	505108	1	1	NTR2	569.533	816.794	8159.03	11462.3	41.5523	41.5523	0.0465067	0.0465067	GTCCGATACCCGGCAAG	GCGCGATACCCGGCAAG	0	0	0	2	1	0	0
1439444	11	493714	11	515392	1	1	SAP190	691.415	1182.93	12066.1	16705.7	4.88195	5.29757	0.000625453	0.00244084	GCATTATCGCCGTAAAT	GAATTATAGCCGTGAAT	0	0	1	2	0	0	0
1439510	11	493780	11	515458	1	1	SAP190	2558.36	2789.57	40651.2	43616.6	46.3069	46.3069	0.93458	0.93458	GGATATTACCCGCGCTA	GGATATTACCCGCGCTA	1	1	0	0	0	0	1
1439570	11	493840	11	515518	1	1	SAP190	756.411	859.874	10643	12180.5	11.0247	11.0247	0.0497621	0.0497621	CTAGTATACCCTTGACG	CTAGTATACCCTTGACG	1	1	0	0	1	0	0
1446958	11	526780	11	548198	1	0	NAP1	956.602	441.046	16501.1	6018.79	46.3069	46.3069	0.93458	0.93458	TTGTATTACCCGCGTAA	TGGTATTACCCGCGGAA	1	1	0	2	0	0	1
1453701	11	559466	11	580848	1	0	TFA2	1414.73	516.359	19464.7	7568.83	7.06313	7.06313	0.000345638	4.49935e-05	CTATAAAAGCCGTGAA-	CTATAAAAGCCA-GAAG	0	0	1	2	0	0	0
1453765	11	559529	11	580912	1	1	TFA2	2684.13	2196.11	43097.4	32281.8	46.3069	46.3069	0.93458	0.93458	ACTTCTTACCCGAAGTA	ACTTCTTACCCGAAGTT	1	1	0	1	0	0	1
1454017	11	562433	11	583813	1	1	LAS1	848.887	1489.39	15445.3	27483.3	46.3069	46.3069	0.93458	0.93458	AAAAATTACCCGAATGT	AAAAATTACCCGAATGT	1	1	0	0	0	0	1
[truncated: 823 more rows]

## Sheet: RAP1
locs	chr_cer	pos_cer	chr_par	pos_par	peak_cer	peak_par	gene	height_cer	height_par	sum_cer	sum_par	max_score_cer	max_score_par	max_PWMscore_cer	max_PWMscore_par	seq_cer	seq_par	motif_cer	motif_par	seqDistMotif	seqDistFlank	motif_com_alt	motif_uni_alt	motif_com_cons
[truncated: 1,296 more rows]

[truncated: 24 more sheets: DOT6, TOD6, FHL1, TBF1, STB3, PHO4, PHO2, HAP4, MBP1, SWI4, SKN7, PHD1, SOK2, HMS2, ASH1, MSN2, GCR2, MIG1, RGT1, SUT1 …]
